# Supplementary material for: Mapping immune variation and var gene switching in naive hosts infected with Plasmodium falciparum
Source: eLife journal article supplement (doi:10.7554/elife.62800), 2021-03-01

uninfected control A

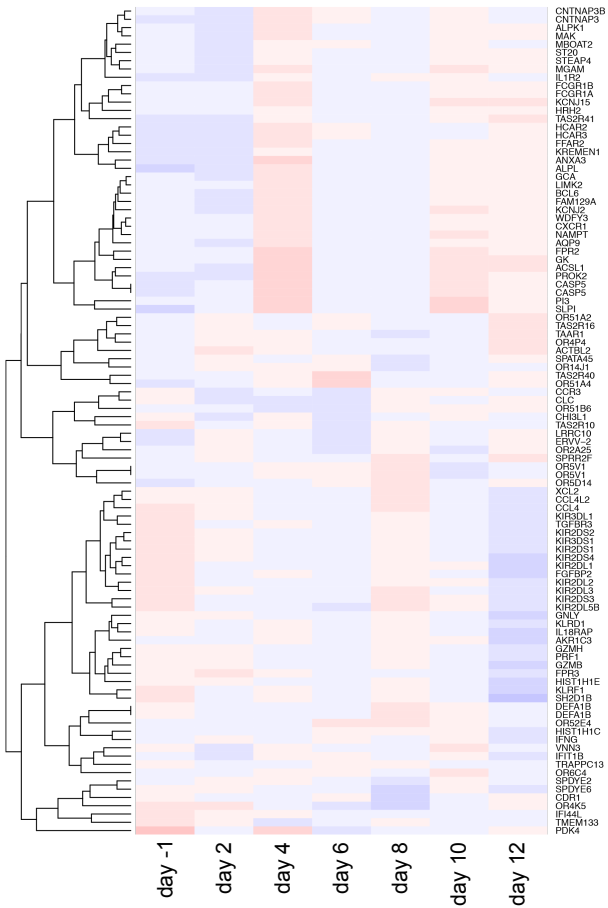

uninfected control B

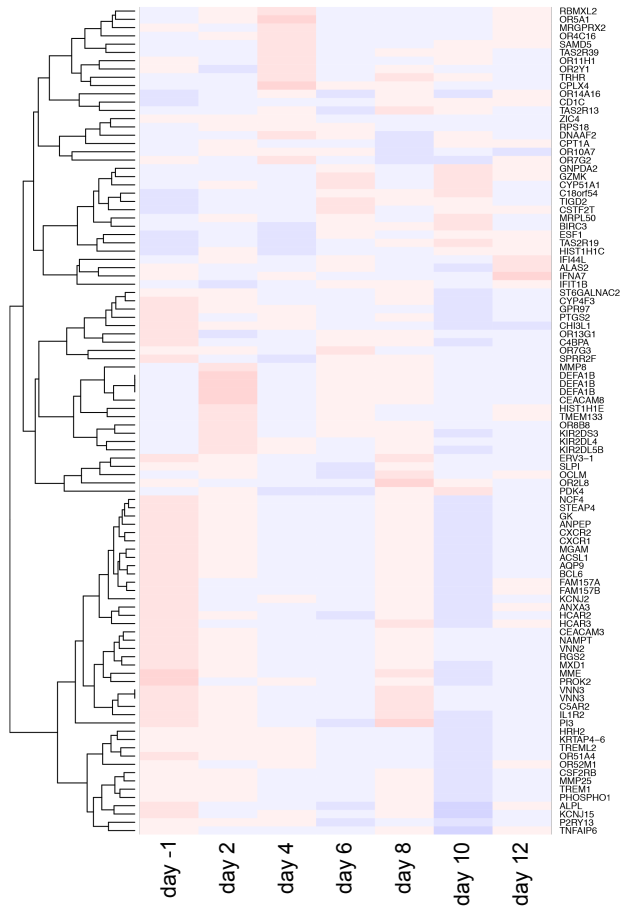

uninfected control C

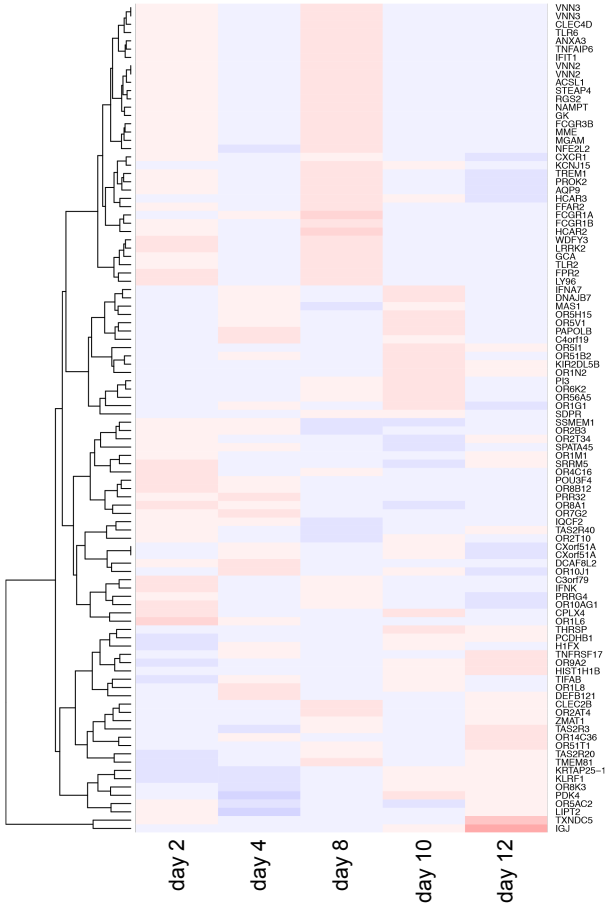

uninfected control D

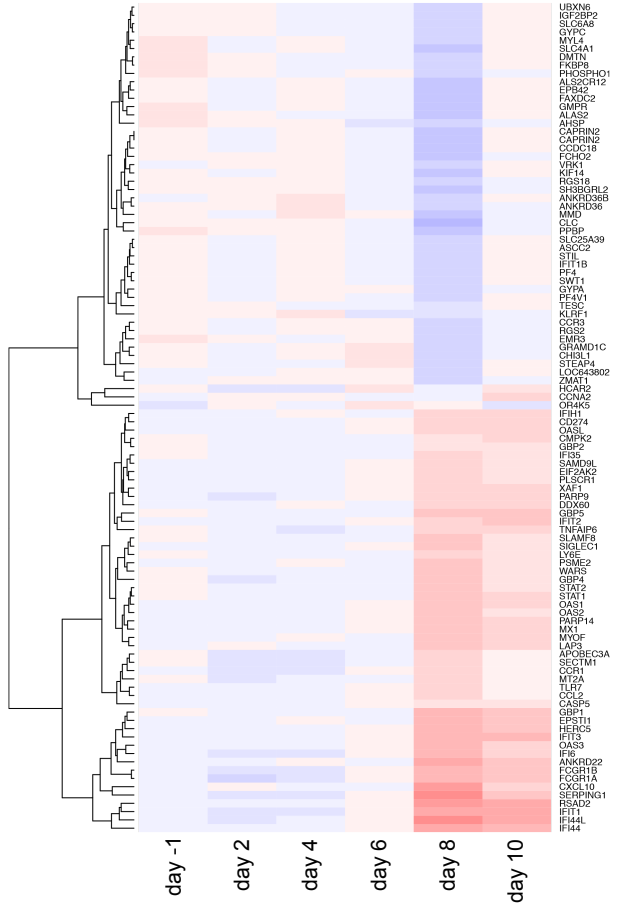

unresponsive v018

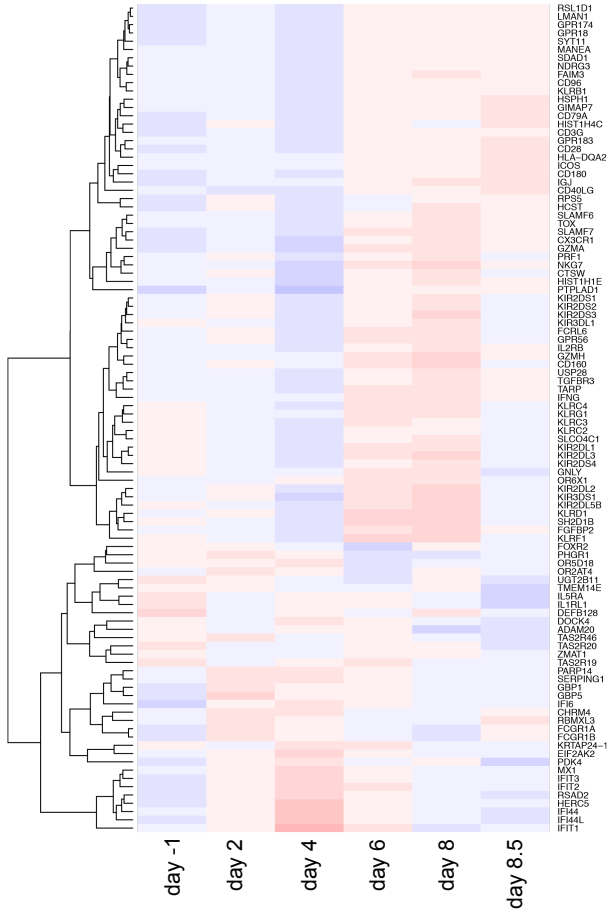

unresponsive v012

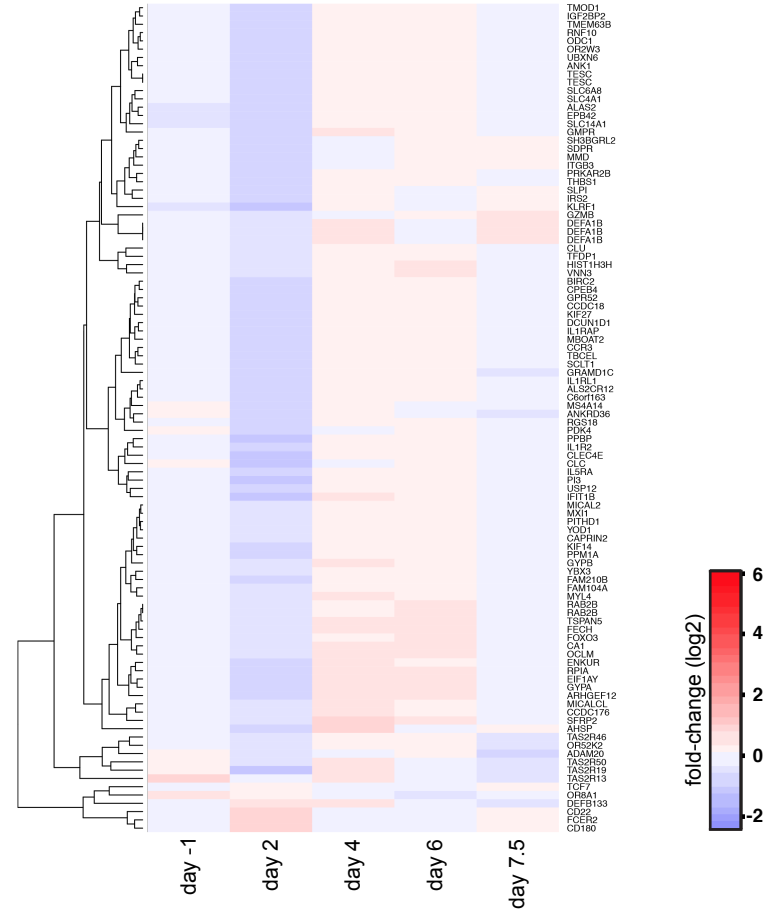

unresponsive v208

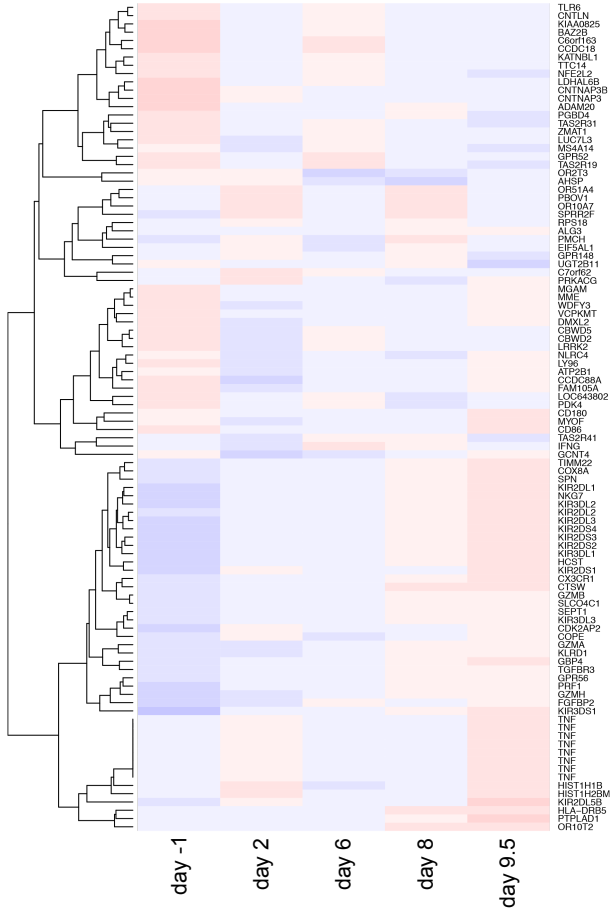

unresponsive v020

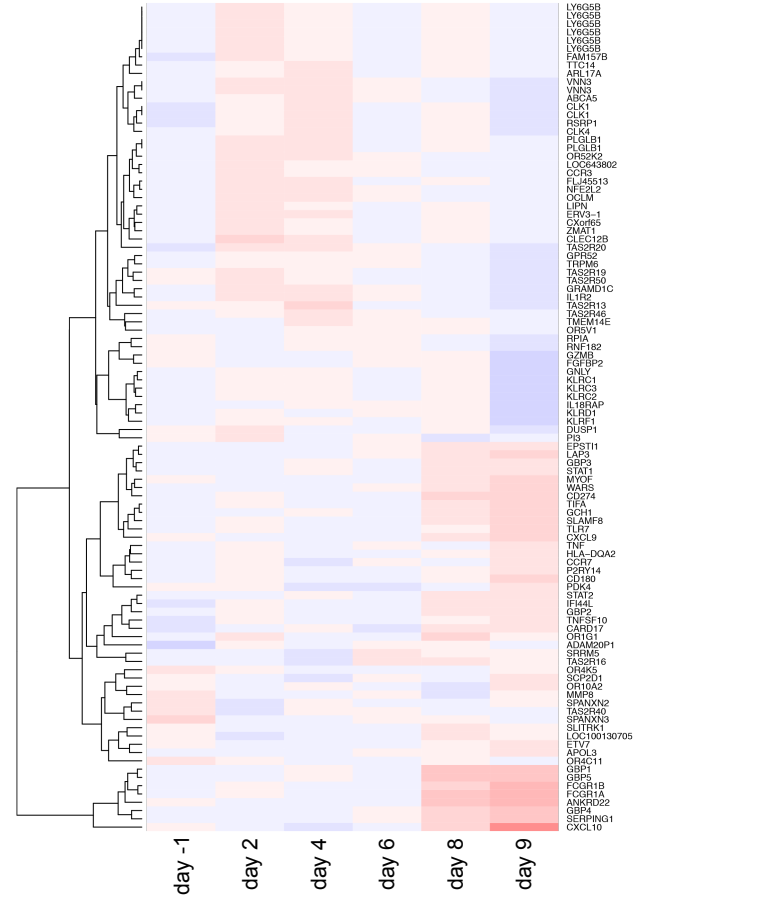





suppressor v022

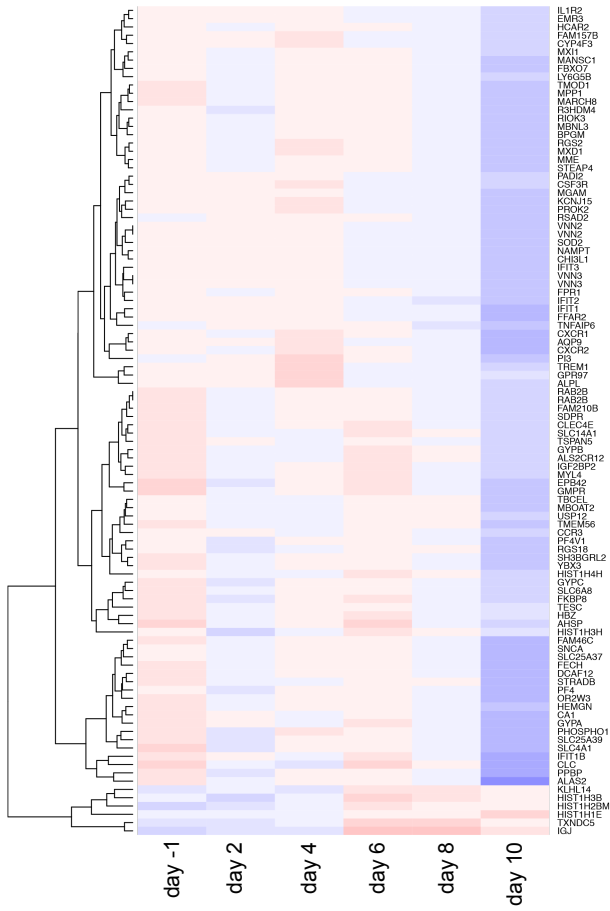

suppressor v019

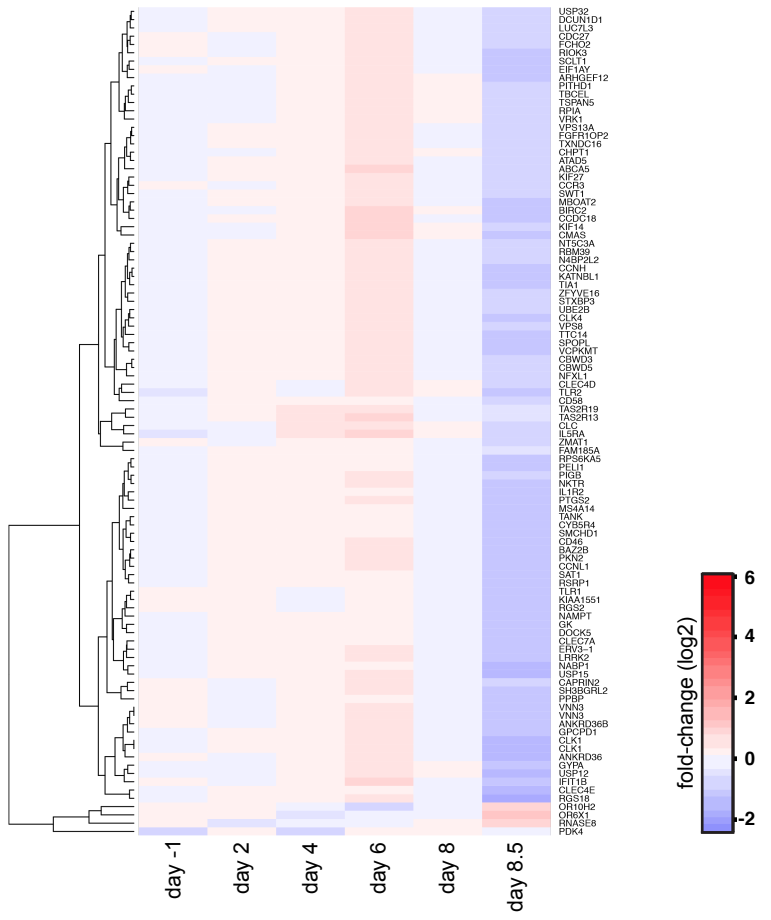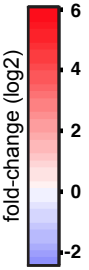

Supplement: fig1-data1 [file elife-62800-fig1-data1-v1.pdf]
