# Supplementary material for: Mapping immune variation and var gene switching in naive hosts infected with Plasmodium falciparum
Source: eLife. 2021 Mar 2;10:e62800. doi: 10.7554/eLife.62800 (PMC7924948; doi:10.7554/eLife.62800)
Supplement: Figure 4—source data 1. [file elife-62800-fig4-data1.xlsx]

## Sheet: var genes
						inoculum										in vitro		in vitro
		v013	v016	v018	v019	rep 1	rep 2	v024	v026	v027	v104	v106	v206	v017	v012	8000	v020	2000	v1037	v1068	v1073	v1074	v1076
	PF3D7_0100100	2.37531	3.65445	0.392878	1.55612	0.439466	7.62689	1.88533	1.30483	3.47898	3.80168	1.23376	1.32607	1.17753	1.66042	1.82437	0.208132	4.29436	4.81879	5.88155	1.03697	6.04017	7.81532
	PF3D7_0100300	-3.83614	-3.87557	-3.87413	-3.87461	-3.87328	-3.87413	-3.87557	-3.87216	-3.87552	-3.8754	-3.87546	-3.8581	-3.87376	-3.86783	-3.84921	-3.87554	-3.84675	-3.86192	-3.86983	-3.86298	-3.8755	-3.85813
	PF3D7_0115700	1.61234	-0.239388	-0.450746	0.982369	2.16912	1.02653	0.330493	-0.346256	-0.946243	-0.517691	-0.67019	0.393211	-0.431513	3.3552	0.787656	2.23836	0.87858	6.73659	0.859586	1.45511	6.76237	3.67708
	PF3D7_0200100	6.36907	5.85049	6.12195	6.26279	5.73236	8.17122	3.6388	4.94934	2.17035	6.08179	6.97858	6.80029	3.17709	4.78994	4.29782	6.32645	4.51385	6.24364	2.18987	8.12509	5.98789	2.77499
	PF3D7_0223500	2.79532	4.04752	0.331682	1.0572	5.87999	0.331248	1.88895	1.2482	1.96323	4.88255	2.44865	2.44022	3.14263	0.677129	3.24407	2.04513	1.8372	6.57496	2.27691	0.954457	7.02653	1.23261
	PF3D7_0300100	6.00363	5.1713	4.76855	7.08132	6.36523	7.12488	5.53428	4.57682	4.02837	5.56303	4.22269	5.25063	5.59376	4.63019	5.20985	5.45022	5.07424	7.38283	7.49982	2.51575	5.6913	2.77124
	PF3D7_0324900	0.206768	0.645083	-1.03561	1.35667	-1.00405	-1.03591	-0.132886	-0.961755	-1.36786	0.769385	2.67806	-0.433796	-1.02208	-0.795226	-0.140136	-1.46033	-0.0584792	3.51682	6.14334	-0.609673	-0.11072	-0.434987
	PF3D7_0400100	1.33242	2.48962	1.61727	0.964921	5.39654	0.989043	1.71528	1.09163	0.548488	5.75334	3.94122	1.90944	2.04114	5.29503	2.4451	3.38902	2.58705	6.37306	6.59684	9.36674	7.24497	5.41728
	PF3D7_0400400	1.15742	1.58812	-0.100613	-0.12857	-0.0516643	5.51531	2.90518	0.0135704	-0.644868	2.45211	-0.340761	0.828741	-0.0795931	0.267881	1.28133	1.70036	1.38975	4.10756	6.54838	7.597	6.75994	0.826819
	PF3D7_0412400	1.62811	0.250579	0.150802	2.07337	-0.683092	-0.708879	1.84599	0.283826	1.18816	-0.746038	-0.117554	-0.180032	-0.697715	-0.507751	2.09967	0.856963	0.174603	4.69684	0.982228	-0.343343	-0.907802	-0.181164
	PF3D7_0412700	-0.130055	-0.0183198	-1.22308	-1.23129	-1.20843	-0.434474	0.644578	-1.18842	-0.914036	0.710601	-1.28972	-0.910522	0.30948	-1.10578	-0.687322	-1.39204	-0.615348	1.5591	-1.14498	-1.00773	0.440087	-0.911191
	PF3D7_0412900	1.09819	-2.75673	-1.40445	-1.42981	-1.36052	-1.40488	0.548105	-1.30293	1.8763	-1.47127	-1.62901	-0.677314	-1.38551	1.85819	3.51395	-2.12156	6.07854	-0.825151	-1.18617	-0.869517	4.03632	-0.678569
	PF3D7_0413100	-0.190257	-0.624269	-1.72414	0.469942	-1.71523	-1.72422	-1.68319	-1.70302	-1.40866	-0.0274733	-1.76427	-1.53075	-1.72034	-1.65227	-1.31373	-1.82403	-1.2493	-1.57876	-1.67639	-1.59193	-1.32111	-1.53117
	PF3D7_0420700	2.33197	1.25076	-0.824086	-0.840191	-0.795662	1.97896	3.22005	1.76989	-1.11496	-0.866035	-0.95887	-0.262967	-0.811914	-0.604707	3.41911	1.92409	0.0941017	-0.393722	-0.676177	-0.43113	1.89018	-0.264119
	PF3D7_0420900	-1.48695	-1.48299	-1.02516	2.73759	-0.996666	4.76029	-0.566579	-0.957881	0.842358	-1.06666	-1.15573	1.27598	-1.01299	0.463136	-0.164932	-1.35666	-0.0797881	2.1224	3.34449	-0.618198	1.21079	-0.445148
	PF3D7_0421100	6.8681	7.42667	6.70051	6.82207	7.16138	6.96663	5.43746	6.03582	6.84394	6.1241	6.71271	5.87299	4.84522	6.62161	3.71679	6.9105	5.33055	5.98247	6.29465	3.54924	5.6674	3.23064
	PF3D7_0421300	6.21753	6.42101	6.79781	6.80985	6.78845	7.0853	5.64356	6.47887	6.36842	6.21226	5.81603	5.03626	4.76246	6.14315	6.29194	6.5597	5.15396	2.70728	6.79352	3.67938	2.00668	2.90731
	PF3D7_0425800	2.48179	2.20714	-0.172625	-0.200873	0.795023	1.23141	2.71318	-0.0574211	1.60465	-0.246607	-0.415845	0.75783	-0.151397	0.198247	1.20443	2.54934	1.31052	5.82882	4.12944	0.482182	6.60168	5.78327
	PF3D7_0426000	1.89741	0.800678	2.89294	1.46978	0.305681	1.51261	2.67807	1.20756	1.15131	0.187384	0.0280335	2.42733	0.278506	0.621611	3.24226	2.24235	1.81368	5.56361	5.38651	7.76598	7.46863	1.19662
	PF3D7_0500100	0.533628	-0.964374	-1.38571	0.311777	-1.37155	-1.38584	-0.184944	-1.35226	-1.51981	1.26608	-1.45053	-1.09058	0.758596	-1.27321	-0.864493	-1.55143	-0.793161	0.707828	-1.31059	-1.18076	-1.49301	-1.09122
	PF3D7_0533100	0.191409	1.13829	2.49596	3.42083	-0.461925	0.745256	1.06375	-0.429171	0.775955	0.649667	1.11609	0.0278338	-0.475701	-0.294627	0.293273	1.32561	0.37253	2.70415	-0.358378	-0.134456	2.62878	0.0266976
	PF3D7_0600200	-1.30456	1.49152	-0.502964	-0.527729	2.5521	0.978411	1.88634	-0.401768	-0.981529	0.352179	-0.715281	0.313316	-0.484341	2.8892	0.691355	-0.537581	0.777819	2.59535	5.13157	4.7391	-0.871891	6.62526
	PF3D7_0600400	-4.40955	-4.39427	-3.74463	-3.75958	-3.7186	-3.74489	-4.3794	-3.68413	-3.9951	-3.7827	-3.85089	-3.25215	-3.73344	-3.55113	-2.9791	-4.086	-2.90366	-3.36971	-3.61274	-3.40227	-3.93232	2.57436
	PF3D7_0617400	2.02568	0.868746	3.20337	0.826567	-0.585453	0.86962	2.35544	-0.530463	3.39602	3.95048	-0.829467	0.140094	1.266	-0.317171	0.483325	-1.22399	0.560262	-0.0329004	2.3681	5.4447	-0.979441	0.138574
	PF3D7_0632500	5.18252	6.50628	4.64359	4.02107	7.22813	5.86242	5.55765	2.85867	4.2839	7.10534	4.59878	4.57184	4.17024	4.12245	4.82336	6.18947	5.45514	6.32818	7.02918	6.1001	7.53774	2.7518
	PF3D7_0632800	6.65599	5.11873	5.61061	5.97016	8.01781	8.71596	5.06916	2.58402	5.85413	5.72076	6.30445	4.58168	5.24353	6.24152	5.70857	5.38819	4.7837	7.67892	6.97434	5.42363	8.59416	5.45466
	PF3D7_0700100	-0.903114	-0.530946	-0.811529	-1.35881	-1.35159	-0.811872	-0.16322	-1.34499	-1.39378	-1.36279	-1.37585	-1.2143	-1.35428	-1.31503	-1.02846	-0.079721	-0.977115	-1.26352	-0.209241	-1.27352	-0.273771	-1.21503
	PF3D7_0711700	2.36888	-1.88767	0.751661	2.01131	-0.915552	0.750849	1.69827	-0.852821	3.67827	0.626336	1.73001	-0.125582	-0.942601	1.82286	0.224473	-1.69957	0.313094	-0.30695	-0.723882	9.4304	-1.38413	-0.127156
	PF3D7_0712000	0.74829	-1.93592	-0.912438	-0.936266	6.39828	3.11934	-0.316005	-0.815453	-1.37901	2.65032	-0.184786	1.55415	6.61132	-0.602009	0.179461	-1.52322	0.265814	-0.321045	0.516211	-0.369929	2.12046	-0.154196
	PF3D7_0712300	2.24857	0.734757	3.44999	0.70889	1.83242	0.741857	1.72033	0.0433868	1.53293	3.35476	-0.195515	0.665052	1.78738	1.20257	1.03408	1.9116	1.12339	4.16935	3.58704	0.445501	0.615864	4.78771
	PF3D7_0712400	1.94936	0.861575	1.2956	-0.529227	-0.466629	-0.506893	0.286553	-0.413309	0.616741	2.56233	-0.700013	0.256204	-0.489397	2.45084	0.613628	0.484429	0.696232	4.04534	4.45072	0.0298112	3.70972	0.254646
	PF3D7_0712600	-0.740561	-0.837044	1.42913	-0.110099	-0.0291766	0.682347	1.61662	-0.849083	-0.606314	-0.923002	-0.983425	-0.481504	-0.886588	0.326258	-0.23845	2.37385	-0.162513	-0.58251	2.18918	-0.611006	-1.04159	-0.482403
	PF3D7_0712800	7.92704	7.006	3.4188	8.11622	7.13893	3.41814	4.57904	8.16163	6.90065	6.31781	6.46719	5.84165	6.78437	3.57419	5.81738	7.05267	5.18025	6.98556	5.15191	7.67482	2.00726	2.93103
	PF3D7_0712900	1.13748	0.393943	-0.830782	-0.842606	4.13294	-0.830984	2.00709	-0.780985	0.638787	-0.861413	-0.249334	1.17719	1.78693	1.67552	-0.119658	-0.692376	-0.0433036	-0.490225	-0.718714	-0.521397	-0.990534	-0.380494
	PF3D7_0733000	3.56081	3.27205	2.54649	1.63725	5.08309	6.90179	1.38093	1.16741	4.34773	5.61114	0.900432	3.83698	3.18133	5.07888	3.70185	4.31631	2.58	6.60502	6.07382	4.74328	6.77516	2.91631
	PF3D7_0800100	4.19197	6.96977	2.93966	6.86192	6.0682	4.65407	3.88727	2.08797	3.18875	5.30477	4.34456	5.24079	3.47586	3.52513	5.48118	5.14675	4.77483	6.60767	6.56981	1.97736	6.00103	2.24951
	PF3D7_0800200	-2.38677	-1.38535	-2.40076	-2.40155	-2.3993	-2.40077	-2.37955	-2.39723	-2.412	-2.40278	-2.40673	-2.28608	-2.40015	-2.38748	-2.18368	-1.78259	-2.1554	-2.33016	-2.39235	-2.34237	-1.81191	-2.28648
	PF3D7_0800300	1.17688	-0.295947	-1.05381	-1.07616	-1.01476	-1.05419	-0.646584	-0.962844	1.91849	0.49095	-1.24622	-0.344793	-1.03703	-0.762734	-0.0298167	0.311851	0.0553832	-0.500516	3.53134	-0.545973	4.43182	7.05145
	PF3D7_0808600	-1.468	-2.15581	-2.38499	-2.38566	-2.38376	-2.385	-1.86128	-2.382	-2.3944	-2.38669	-2.08359	-2.27948	-2.38447	-2.37366	-2.18427	-2.26241	-2.15797	-2.32047	-2.37784	-2.33183	-2.39281	-2.27985
	PF3D7_0808700	1.74346	-0.152804	-1.06412	-1.07913	-1.03765	-1.06438	2.51024	0.0262001	1.51529	-1.10322	2.23944	-0.549396	-1.05278	-0.86064	1.83471	-1.4084	2.95934	-0.667384	0.193857	-0.701419	-1.27764	-0.550428
	PF3D7_0809100	3.27077	4.90206	5.78762	3.66447	4.32271	2.4174	2.92539	7.42927	2.88532	3.44486	6.02124	3.34055	1.53083	3.80624	4.98458	4.96892	2.36654	4.32952	1.07929	1.45122	4.75848	1.72808
	PF3D7_0833500	1.26927	1.31364	-0.660891	-0.689431	-0.611107	-0.661374	-1.31626	-0.545122	2.29082	-0.735769	1.39921	0.243764	-0.639483	0.9456	0.644437	-1.41761	0.735084	5.86057	-0.408676	8.10082	0.228531	6.57135
	PF3D7_0900100	1.72779	-1.09128	-1.00957	0.00963922	-0.972683	0.60335	2.41778	-0.923537	-1.4144	-1.0647	-1.19001	-0.329716	0.0764453	-0.732927	-0.0206818	0.45076	0.0637987	1.0648	-0.821178	-0.524619	3.39759	1.39725
	PF3D7_0937600	-1.21369	-1.89089	-2.11709	-2.1192	-2.11328	-1.10083	-0.705553	-2.10799	-2.14978	-2.12252	-2.13368	-2.00671	-2.11547	-2.08512	-1.8198	-2.15655	-1.76816	-2.04766	-2.09616	-2.05495	-2.14376	-2.00745
	PF3D7_0937800	3.99117	4.28702	5.27103	4.01156	6.43273	7.85722	3.82415	2.98823	4.65443	5.83861	3.27738	5.99319	2.62507	5.42607	3.14358	5.24259	4.99531	7.04226	7.82527	2.34855	6.91141	2.61428
	PF3D7_1000100	0.313403	1.8616	2.24707	1.42128	-0.908384	1.47347	1.46801	-0.843722	-0.681774	2.46463	2.38878	-0.0972768	-0.936286	-0.598369	0.259871	-1.72476	0.34899	1.2847	-0.711001	10.0488	-1.39399	-0.0988886
	PF3D7_1041300	10.3453	10.3009	9.58694	9.97614	10.0709	10.1732	10.6121	10.0734	8.01512	9.69847	9.61325	8.79503	8.58931	9.3614	9.47447	10.1871	8.91042	7.48238	7.87195	10.8011	7.8889	5.49316
	PF3D7_1100100	4.94603	6.34386	4.52962	6.97239	8.18593	6.95208	5.85061	7.76448	4.17103	7.20009	6.3722	6.0694	5.58281	5.78908	5.04974	6.37951	5.2846	5.89498	6.98709	5.83217	6.94942	3.1317
	PF3D7_1100200	0.47889	1.06213	1.60578	1.82135	-0.046368	1.26149	3.31763	0.0147495	1.9012	1.14736	-0.314431	0.791836	2.93842	1.29146	2.94938	-0.208377	1.33572	1.80403	6.33453	0.525477	6.19355	5.54268
	PF3D7_1150400	-1.93886	-1.93115	-1.33182	-1.34823	-1.30299	-1.3321	-1.92343	-1.26441	-0.227117	0.555294	0.543575	-0.794372	-1.31945	-1.11354	2.97474	-1.72254	-0.427387	1.4801	1.43783	-0.947938	-1.57013	1.88946
	PF3D7_1200100	8.16527	8.79032	7.65381	8.14405	7.46666	9.49099	8.38144	8.79341	8.1417	7.95349	7.85556	6.4501	6.83022	7.41262	7.71951	7.49891	7.02563	7.00512	6.90932	3.77159	6.22138	3.96365
	PF3D7_1200400	4.41387	3.90627	6.04185	2.13151	6.86316	6.58733	4.17652	2.3227	6.52285	3.31486	3.11034	3.56135	1.26634	4.28046	4.43367	4.79813	4.03188	5.95855	6.34416	2.62932	6.51061	2.08278
	PF3D7_1200600	5.50504	7.48844	4.84503	5.68435	6.37129	4.53827	6.30836	6.86991	4.59834	4.06712	4.42496	5.39584	5.52965	4.52486	6.8063	4.667	6.76909	7.37404	6.44279	7.16879	6.39833	4.50278
	PF3D7_1219300	0.911597	1.40306	0.915478	-0.714097	-0.67774	0.128552	1.29745	-0.64607	0.864872	-0.734952	-0.808287	1.30456	1.19943	0.558364	2.03783	0.459337	0.13451	4.25345	-0.577727	-0.362854	-0.879663	-0.209967
	PF3D7_1240300	0.455638	2.21169	-0.157997	1.44881	-1.0068	-1.02858	-0.321808	-0.977574	1.65082	-1.06001	-1.12903	-0.591588	0.661282	-0.859607	1.6567	-1.29467	-0.27031	-0.694317	2.05182	-0.723714	-1.19713	-0.592491
	PF3D7_1240400	2.64087	1.70587	-0.472584	2.00353	0.552247	-0.473024	2.2272	-0.366704	1.40655	0.891179	-0.69652	0.370826	2.74185	-0.132672	0.756369	1.39741	0.844507	0.179609	5.46442	0.124769	4.34255	0.36914
	PF3D7_1240600	0.687811	1.86524	-0.838019	-0.857881	-0.803128	-0.838357	0.943114	-0.756429	-1.21055	1.19284	-1.00658	-0.173917	-0.823054	-0.573107	2.2496	2.25987	0.21877	6.06948	2.0023	-0.368872	3.92049	-0.175245
	PF3D7_1240900	0.964747	-0.929359	-1.16428	-1.17469	-1.14579	-1.16445	1.30287	-1.12068	0.878774	1.77486	-1.24979	-0.784492	1.0654	-1.01859	1.43925	-1.38696	-0.471201	-0.874362	0.469392	-0.90007	-1.30681	-0.785282
	PF3D7_1255200	3.27014	5.87393	4.08011	5.30678	4.488	6.89799	3.20079	2.56378	1.22926	6.4357	3.64761	6.16262	1.58341	2.50997	4.64324	4.5688	3.09754	7.8908	7.92099	9.02423	7.6222	2.40706
	PF3D7_1300100	2.40496	3.07762	1.78205	1.32603	3.16362	7.14335	3.85877	1.51063	2.90323	2.82772	3.74165	3.26588	0.69191	3.15388	2.09064	2.05741	2.22274	4.98868	3.83395	7.88215	6.93764	3.95607
	PF3D7_1300300	0.94677	-1.24168	-1.52291	0.815979	-1.49015	-0.369939	1.46123	-1.44692	-1.90025	-1.57237	-1.68701	-0.964605	-1.50881	-1.2838	-0.686998	-1.32091	-0.60312	-1.07973	4.20208	-1.11424	0.520798	0.899286
	PF3D7_1373500	2.67899	2.40969	0.388704	0.36391	0.432411	1.13362	2.91122	0.491233	2.74289	4.34081	2.66375	3.48911	3.40875	0.726466	3.26394	2.45465	3.48776	5.97489	6.11285	0.999561	6.48392	6.51183
	var type
	group A
	group B
	group C
	var2csa

## Sheet: rifin genes
						inoculum										in vitro		in vitro
		v013	v016	v018	v019	rep 1	rep 2	v024	v026	v027	v104	v106	v206	v017	v012	8000	v020	2000	v1037	v1068	v1073	v1074	v1076
	PF3D7_0100200	-0.158621	-1.51753	-1.72359	-1.72793	-1.71579	-1.72366	-1.67752	-1.70503	0.0937441	-0.232155	-1.21421	-1.54667	-1.72026	-1.6597	-1.32951	-1.80855	-1.26756	-1.59224	-1.68138	-1.60448	-1.78006	-0.186602
	PF3D7_0100400	-3.53507	-3.53506	-3.53062	-3.2968	-3.52825	-3.53064	-3.50076	-3.52512	-3.53449	-3.53325	-3.53379	-3.48589	-3.5296	-3.51304	-3.46109	-3.5347	-3.45424	-3.49657	-3.51864	-3.49952	-3.53429	-3.48599
	PF3D7_0100600	-2.88975	-2.88968	-2.87825	-2.87878	-2.87729	-2.87826	-2.8896	-2.87592	-2.09072	-2.87959	-2.88223	-2.77379	-2.87785	-2.86855	-2.67694	-2.46446	-2.65019	-2.81549	-2.87269	-2.82704	-2.88448	-2.77417
	PF3D7_0100900	-2.51479	-2.02822	-2.50132	-2.50195	-2.50016	-1.78076	-1.77892	-2.4985	-2.5102	-2.50292	-2.50606	-2.39496	-2.50083	-2.49065	-2.30441	-2.51182	-2.2794	-2.43395	-2.49458	-2.44475	-2.5087	-2.39532
	PF3D7_0101000	-3.66261	-3.60095	-3.68521	-3.68569	-3.68374	-3.68522	-3.68615	-3.68179	-3.686	-3.68573	-3.68585	-3.65742	-3.68457	-3.67429	-3.64202	-3.68605	-3.63776	-3.66406	-3.67777	-3.66589	-3.68594	-3.65748
	PF3D7_0101600	-3.1301	-3.43541	-3.4337	-3.43379	-3.43354	-3.4337	-3.4354	-3.43023	-3.43486	-3.43392	-3.43433	-3.38414	-3.43364	-3.41604	-3.35501	-3.43506	-3.34696	-3.39668	-3.42261	-3.40016	-3.43467	-3.38426
	PF3D7_0101900	-3.77744	-3.70576	-3.77603	-3.7767	-3.77486	-3.77604	-3.77744	-3.77331	-3.77734	-3.77716	-3.77724	-3.75391	-3.77552	-3.76734	-3.74165	-3.77737	-3.73826	-3.75919	-3.77011	-3.76065	-3.7773	-3.75396
	PF3D7_0115600	0.665258	0.603722	-1.3827	-1.40398	-1.3457	-1.38306	-1.35528	-1.29691	-0.51605	0.626529	1.73465	-0.75071	-1.36677	1.37282	-0.467198	-1.95248	-0.381404	-0.882032	2.94028	4.61056	-1.711	-0.75183
	PF3D7_0223100	-3.0613	-3.06123	-3.05046	-3.05095	-3.04955	-3.05047	-3.06116	-3.04825	-2.86072	-2.18799	-3.05422	-2.94126	-3.05007	-3.03694	-2.85388	-3.05887	-2.82974	-2.97888	-3.04471	-2.9893	-3.05634	-2.9416
	PF3D7_0300200	-2.83484	-1.32518	-2.71676	-2.72082	-2.70953	-2.71683	-2.83278	-2.6997	-2.78526	-2.72729	-2.01226	-2.47192	-2.71367	-2.65987	-2.25699	-2.80123	-2.19762	-2.56445	-0.374918	-2.59009	-2.77164	-2.47276
	PF3D7_0300500	-2.54901	-3.20396	-3.19938	-3.1996	-3.19897	-3.19939	-3.20393	-3.19838	-3.20245	-3.19995	-3.20104	-3.12367	-3.19921	-3.176	-3.07588	-3.203	-3.06268	-3.14425	-3.18679	-3.14995	-3.20194	-3.12386
	PF3D7_0300800	-4.02159	-4.02395	-4.02377	-4.02389	-4.02355	-4.02377	-4.02395	-4.02327	-4.02394	-4.02393	-4.02394	-4.01968	-4.02368	-4.02216	-4.01741	-4.02394	-4.01678	-4.02065	-4.02267	-4.02092	-4.02394	-4.01969
	PF3D7_0324400	-4.91544	-4.86629	-3.69033	-3.70352	-3.66809	-3.69055	-4.82089	-3.64012	-4.02927	-3.72565	-3.81738	-3.13937	-3.68064	-3.48989	-2.81926	-4.1784	-2.73082	-3.27719	-3.56211	-3.31537	-3.93376	-3.14063
	PF3D7_0324800	-2.62979	-2.97418	-2.96853	-2.9688	-2.96802	-2.96853	-2.97415	-2.96729	-2.97231	-2.41983	-2.97057	-2.88817	-2.96831	-2.94909	-2.83254	-2.97299	-2.81717	-2.91213	-2.96164	-2.91876	-2.97169	-2.88839
	PF3D7_0400300	-1.5857	-1.32041	-1.65827	-1.66155	-1.65236	-1.65833	-0.197316	-1.64414	-1.17759	-0.101529	-0.286912	-1.51261	-1.02746	-1.60847	-1.30885	-1.30686	-1.25113	-1.55256	-1.62573	-1.56295	-1.69957	-1.51297
	PF3D7_0400500	-2.64646	-2.62836	-1.62773	-1.65008	-1.58885	-1.62811	-2.61056	-1.53758	-0.612467	-1.68645	-1.82262	-0.985632	-1.611	-1.34476	-0.687314	-2.2177	-0.6049	-1.11407	7.03569	-1.14965	6.23654	-0.986802
	PF3D7_0400700	-3.35772	-3.02891	-3.35568	-3.35579	-3.3555	-3.35569	-3.32249	-3.35359	-3.35705	-3.35594	-3.35643	-3.30236	-3.35561	-3.33782	-3.26998	-3.35729	-3.26103	-3.3163	-3.34512	-3.32016	-3.35683	-3.30249
	PF3D7_0401300	-3.14557	-3.14522	-3.10126	-3.10292	-3.09828	-3.10128	-3.14487	-3.09419	-3.12804	-3.10555	-1.65434	-2.92777	-3.09999	-3.07704	-2.75383	-3.13387	-2.70578	-3.00266	-3.08524	-3.0234	-3.12293	-2.92845
	PF3D7_0401400	-3.94548	-3.93905	-3.53802	-3.54673	-3.52302	-3.53817	-3.93266	-3.49217	-3.72051	-3.56101	-3.61573	-3.09288	-3.53154	-3.36923	-2.84049	-3.77922	-2.77077	2.22527	-3.42618	-3.23164	-3.67668	-3.09387
	PF3D7_0401600.1	5.18274	4.1865	4.24332	4.66899	1.57956	1.54634	4.38517	5.88367	5.95176	6.02208	5.2187	5.03409	4.72927	4.75468	2.85273	4.1493	2.99554	6.69735	6.4719	2.06496	6.49315	2.33338
	PF3D7_0401600.2	0.330625	1.39875	-0.0273063	-0.0479812	1.29756	2.17432	1.35765	0.0585814	1.22709	2.44157	-0.199691	0.719863	-0.0116666	0.257064	4.06227	2.41502	3.83235	0.538533	3.58411	2.91148	3.99479	2.03999
	PF3D7_0421200	2.19333	1.08548	2.54891	-0.408826	-0.371081	3.02135	1.32157	-0.338126	0.547772	1.0157	0.99714	0.125877	-0.38493	-0.20235	0.399888	2.64902	0.474517	-0.0036994	1.49062	1.14801	-0.579634	0.124712
	PF3D7_0425900	-4.05585	-4.06224	-4.06128	-4.06146	-4.06095	-4.06128	-4.06223	-4.06053	-4.06223	-4.06176	-4.06222	-4.05516	-4.06114	-4.05887	-4.05177	-4.06223	-4.05083	-4.05662	-4.05964	-4.05703	-4.06222	-4.05517
	PF3D7_0600500	-3.51048	-3.50614	-3.5481	-3.54814	-3.54721	-3.5481	-3.54891	-3.54465	-3.54866	-3.54821	-3.5484	-3.51253	-3.54807	-3.53476	-3.49223	-3.45141	-3.48662	-3.52127	-3.53934	-3.52369	-3.54857	-3.51261
	PF3D7_0617700	-3.63064	-3.63063	-3.6297	-3.63002	-3.62803	-3.62972	-3.55575	-3.6258	-3.56455	-3.63007	-3.63023	-3.59797	-3.62898	-3.61723	-3.58038	-3.6305	-3.57551	-3.60554	-3.6212	-3.60764	-3.63036	-3.59804
	PF3D7_0632400	-2.65662	-2.69128	-2.67385	-1.88575	-2.67238	-2.67387	-2.69117	-2.67029	-2.68531	-1.52356	-2.67992	-2.54917	-2.67323	-2.65523	-2.45232	-2.68744	-2.42556	-2.59087	-2.66541	-2.60242	-2.68335	-2.54955
	PF3D7_0632700	-0.837857	-2.12832	-1.86668	-1.87491	-1.85215	-1.86682	-1.08633	-1.83256	-0.311958	-0.571588	-1.17679	-1.57944	-1.86046	-1.75472	0.659764	-2.04858	-1.25348	0.93903	-1.79105	-1.66831	-1.9817	-1.58044
	PF3D7_0700500	-4.11703	-4.11318	-4.11609	-4.11623	-4.11585	-4.11609	-4.11703	-4.11553	-4.11702	-4.11645	-4.11702	-4.11153	-4.11598	-4.1143	-4.109	-4.11703	-4.1083	-4.11262	-4.11487	-4.11292	-4.11702	-4.11154
	PF3D7_0701100	-3.14965	-3.2798	-3.37603	-3.37611	-3.37587	-3.37603	-3.3777	-3.37313	-3.37717	-3.37624	-3.37665	-3.32733	-3.37596	-3.35903	-3.29838	-3.37737	-3.29039	-3.3398	-3.36556	-3.34325	-3.37698	-3.32745
	PF3D7_0732200	-2.17204	-2.62585	-2.60414	-2.60506	-2.60248	-2.60416	-2.6257	-2.60016	-2.61795	-2.60649	-2.61125	-2.51346	-2.60344	-2.58978	-2.36813	-1.6347	-2.32798	-2.56974	-2.59491	-2.5733	-2.61547	-2.51403
	PF3D7_0732300	-3.19864	-3.19859	-3.19094	-3.1913	-3.19029	-3.19095	-3.19854	-3.18936	-2.48825	-3.19185	-3.19363	-3.0932	-3.19067	-3.18015	-3.01379	-3.19692	-2.99185	-3.12739	-3.1864	-3.13686	-3.19513	-3.09351
	PF3D7_0732900	-2.64753	-2.80054	-2.72392	-2.72675	-2.71888	-2.72397	-2.79991	-2.71196	-0.899029	-2.73122	-1.4529	-2.5289	-2.72177	-2.68334	-2.3291	-2.78027	-2.2739	-2.61492	-2.69691	-2.63874	-2.76112	-2.52968
	PF3D7_0800400	-2.06554	-2.03542	-2.37216	-2.37307	-2.37049	-2.37217	-2.3917	-2.36812	-1.10976	-1.9361	-2.37902	-2.25067	-2.37145	-2.35705	-2.14233	-2.23192	-2.1124	-2.29731	-2.36256	-2.31023	-2.38289	-2.25109
	PF3D7_0800500	-3.24137	-3.13674	-3.23851	-3.23865	-3.23825	-3.23851	-3.24134	-3.23714	-2.84902	-3.23886	-3.23955	-3.17752	-3.2384	-3.21878	-3.13984	-3.24077	-3.12943	-3.19375	-3.22729	-3.19824	-3.24011	-3.17767
	PF3D7_0808900	-3.40667	-3.40666	-3.40454	-3.40465	-3.40427	-3.40454	-3.40665	-3.40028	-3.04878	-3.40481	-3.40532	-3.35033	-3.40446	-3.3849	-3.31876	-3.40622	-3.31004	-3.36393	-3.39203	-3.36769	-3.40574	-3.35046
	PF3D7_0832500	-3.44618	-3.44617	-3.44426	-3.44436	-3.44286	-3.44426	-3.44616	-3.43915	-3.44555	-3.4445	-3.12119	-3.3927	-3.44419	-3.42485	-3.36334	-3.44577	-3.35523	-3.40534	-3.43148	-3.40885	-3.44534	-3.39282
	PF3D7_0833000	-3.34058	-3.34043	-3.31787	-3.31885	-3.31608	-3.31789	-3.27863	-3.30881	-3.02747	-3.32038	-3.32542	-3.16226	-3.31711	-3.26369	-3.06962	-3.33523	-3.04403	-3.20214	-3.28459	-3.21319	-3.32983	-3.16262
	PF3D7_0833100	-2.927	-2.92693	-2.91546	-2.91599	-2.91449	-2.91547	-2.92685	-2.91312	-2.923	-2.53136	-2.91945	-2.80924	-2.91505	-2.90565	-2.71335	-2.9244	-2.68686	-2.85053	-2.90976	-2.86196	-2.1209	-2.80962
	PF3D7_0833400	-2.74076	-2.08869	-2.82504	-2.82542	-2.82435	-2.82505	-2.83285	-2.82335	-2.83029	-2.47847	-2.82786	-2.73434	-2.82475	-2.80753	-2.6675	-2.83123	-2.64903	-2.76311	-2.82098	-2.77109	-2.82941	-2.7346
	PF3D7_0900200	-3.15196	-3.15192	-2.23476	-3.14446	-3.1434	-3.14409	-3.15187	-3.14242	-3.14929	-3.14503	-3.14687	-3.04823	-3.1438	-3.11565	-2.98665	-3.15024	-2.96964	-3.07474	-3.12954	-3.08208	-3.14842	-3.04847
	PF3D7_0900400	-3.46659	-3.42124	-3.46482	-3.46494	-3.46294	-3.46483	-3.46657	-3.45946	-3.46603	-3.46507	-3.46549	-3.41586	-3.21033	-3.44603	-3.3883	-3.46623	-3.38068	-3.42772	-3.45225	-3.43101	-3.46583	-3.41596
	PF3D7_0937400	-3.6489	-3.50011	-3.64678	-3.64776	-3.64505	-3.64679	-3.64889	-3.64277	-3.64865	-3.64823	-3.64842	-3.61421	-3.64603	-3.63398	-3.59616	-3.64874	-3.59117	-3.62198	-3.63805	-3.62414	-3.64857	-3.61428
	PF3D7_0937500	-3.55022	-3.58154	-3.58006	-3.58066	-3.57812	-3.58008	-3.42756	-3.57555	-3.58125	-3.58073	-3.58096	-3.5433	-3.57923	-3.56562	-3.52292	-3.58135	-3.51729	-3.55208	-3.57022	-3.55451	-3.58114	-3.54338
	PF3D7_0937700	-2.74699	-1.59458	-2.053	-2.06919	-2.02481	-2.05327	-2.7255	-1.98759	0.865858	-0.825553	-2.19359	-1.54251	-2.04087	-1.84747	-1.25898	-2.4711	-1.18065	-1.66458	1.9206	-1.6984	-2.29905	-1.54363
	PF3D7_1000200	-2.19232	-1.60177	-2.12928	-2.13175	-2.12483	-2.12932	-2.19137	-2.11867	-1.85411	-1.57163	-1.02347	-2.00238	-0.58764	-2.09232	-1.80901	-2.17619	-1.75559	-2.05023	-2.10499	-2.0583	-2.16081	-2.00314
	PF3D7_1000300	-3.18651	-3.18605	-3.1316	-3.13351	-3.12821	-3.13163	-3.18557	-3.12361	-3.16368	-3.13654	-3.14717	-2.9565	-3.13015	-3.10236	-2.7835	-3.1711	-2.73571	-1.59757	-3.1124	-3.05161	-3.15733	-2.95718
	PF3D7_1000600	-3.6595	-3.65065	-3.18046	-3.18954	-3.16489	-3.18061	-3.64193	-3.14483	-3.37909	-0.44991	-3.26282	-2.80612	-3.17372	-3.07394	-2.53601	-3.44754	0.887497	-2.92241	-3.10553	-2.95462	-3.32963	-2.80718
	PF3D7_1040400	-2.7339	-2.73383	-2.7216	-2.72218	-2.72055	-2.72161	-2.0169	-2.71904	-2.7297	-1.84366	-2.72592	-2.61366	-2.72116	-2.70464	-2.53058	-2.73118	-2.50762	-2.64944	-2.71548	-2.65935	-2.72833	-2.61399
	PF3D7_1040500	-3.0424	-3.04224	-3.01929	-3.02024	-3.01756	-3.01931	-3.04208	-3.01515	-1.95888	-3.02174	-3.02673	-2.88692	-3.01856	-3.0046	-2.73868	-3.03675	-2.69773	-2.95074	-3.00972	-2.96842	-3.03118	-2.8875
	PF3D7_1040900	-3.3105	-3.31048	-3.30742	-3.30757	-3.30714	-3.30742	-3.31046	-3.30465	-2.8304	-3.3078	-3.30853	-3.24368	-3.3073	-3.28588	-3.20514	-3.30984	-3.1945	-3.26027	-3.29457	-3.26487	-3.30914	-3.24383
	PF3D7_1041200	-2.82515	-2.82503	-2.80697	-2.80772	-2.8056	-2.80698	-2.8249	-2.80369	-1.8863	-2.8089	-2.81285	-2.71484	-2.80639	-2.79421	-2.57772	-2.82073	-2.53984	-2.77387	-2.79939	-2.78081	-2.81635	-2.71538
	PF3D7_1100500	-2.63293	-2.63278	-1.76327	-2.61175	-2.60911	-2.61083	-2.63262	-2.60671	-2.62487	-2.61322	-1.76864	-2.50743	-2.61009	-2.59585	-2.36686	-2.62764	-2.32803	-2.56795	-2.60125	-2.57855	-2.62236	-2.50798
	PF3D7_1101100	-3.00936	-3.06103	-3.03467	-3.03576	-3.03271	-3.03469	-3.06084	-3.02997	-1.88304	-3.03746	-3.04316	-2.89078	-3.03384	-3.01806	-2.73713	-3.05468	-2.69468	-2.95693	-3.02382	-2.97525	-3.04827	-2.89138
	PF3D7_1101300	-4.01543	-4.01677	-4.01656	-4.0167	-4.01632	-4.01657	-4.01513	-4.016	-4.01676	-4.01675	-4.01675	-4.012	-4.01646	-4.01477	-4.00947	-4.01676	-4.00877	-4.01309	-4.01534	-4.01339	-4.01676	-4.01201
	PF3D7_1149800	-2.76817	-1.55707	-2.7683	-2.77158	-2.76244	-2.76836	-2.85518	-2.75438	-0.19376	-2.77676	-2.79457	-2.53297	-2.7658	-2.72082	-2.33336	-2.83298	-2.27822	-2.61891	-2.73678	-2.64272	-2.81116	-2.53376
	PF3D7_1200200	-1.22375	-0.774642	-1.46724	-1.48321	-1.43914	-1.46751	-2.0264	-1.4015	2.91108	-0.434303	-0.653064	-0.938945	-1.45519	-1.25404	-0.659852	-1.84174	-0.582748	-1.05895	3.29294	-1.09265	-1.69744	-0.94004
	PF3D7_1200300	-2.07739	-3.37901	-0.643602	-2.18283	-2.12357	-2.16144	-3.3486	-2.07475	-0.929121	-2.21855	-2.356	-1.55235	-2.14488	-1.89748	-1.24226	-2.79659	-1.15659	7.03756	6.10163	-1.72284	-2.51274	-1.55357
	PF3D7_1200500	0.149537	1.83255	0.517713	-0.890833	-0.849398	-0.876114	1.4632	-0.813686	-1.14333	-0.0564972	0.185641	-0.348451	0.0533555	-0.670662	1.96316	-0.751025	0.000120747	-0.471906	1.92986	-0.507204	-1.08669	2.97454
	PF3D7_1254200	-3.04126	-2.90082	-3.03232	-3.03273	-3.03157	-3.03233	-3.00683	-3.03049	-2.32892	-3.03337	-3.03542	-2.93407	-3.032	-3.02421	-2.84553	-3.03925	-2.82107	-2.97218	-3.0275	-2.98274	-3.03717	-2.93441
	PF3D7_1255100	-0.938461	-2.54349	-2.28544	-2.29298	-2.27221	-2.28557	-2.54062	-2.25454	-1.21703	-2.30512	-2.34914	-2.01564	-2.27977	0.218255	-1.76108	-2.46038	-1.69076	0.659811	-2.21772	-2.11345	-2.39395	-2.01663
	PF3D7_1300200	-0.903534	-1.91567	-1.91545	-1.91772	-1.91133	-1.91549	-1.96904	-1.90556	-0.620752	-1.08667	-1.49642	-1.77931	-1.9137	-1.88005	-1.59752	-1.95661	-1.5473	-1.83751	-0.626701	-1.84627	-1.94356	-1.78003
	PF3D7_1372600	-3.07692	-2.12517	-3.06881	-3.06919	-3.06811	-3.06882	-3.04409	-3.06709	-3.07417	-3.06978	-3.07168	-2.97281	-3.06851	-3.04258	-2.90908	-3.07514	-2.89148	-3.00024	-3.05696	-3.00784	-3.07327	-2.97306
	PF3D7_1479700	-2.96483	-2.96473	-2.95135	-2.22345	-2.95031	-2.95136	-2.96464	-2.94884	-2.95993	-2.95282	-2.95579	-2.85618	-2.95091	-2.9407	-2.7351	-2.96161	-2.70164	-2.90831	-2.94514	-2.92275	-2.9584	-2.85665
