# Supplementary material for: Mapping immune variation and var gene switching in naive hosts infected with Plasmodium falciparum
Source: eLife. 2021 Mar 2;10:e62800. doi: 10.7554/eLife.62800 (PMC7924948; doi:10.7554/eLife.62800)
Supplement: Supplementary file 2. — [1] The mean variance of the top 50 most variable protein-coding genes in each volunteer. [2] The Euclidean distance travelled during principal component analysis of the 517-gene superset. [3] The number of differentially expressed genes at diagnosis in each group. Note that uninfected control volunteers set a threshold for baseline variation in gene expression through time; a Mann Whitney test was then used to support the observation that unresponsive volunteers were comparable to uninfected controls. Classification of volunteers by host response after blood challenge is described in the results and methods. [file elife-62800-supp2.xlsx]

## Sheet: metrics
				differentially
		variance	PCA distance	expressed genes	responder
	control A	0.144	3.23	-	-
	control B	0.104	1.02	-	-
	control C	0.112	3.3	-	-
	control D	0.45	3.13	-	-
	uninfected mean	0.2025	2.67
	v018	0.212	2.36	group analysis	no
	v012	0.22	0.87	group analysis	no
	v208	0.171	3.74	group analysis	no
	v020	0.2	7.28	group analysis	no
	unresponsive mean	0.20075	3.5625	zero
	v016	2.344	19.04	group analysis	yes
	v017	1.759	15.46	group analysis	yes
	v013	1.084	14.76	group analysis	yes
	v027	1.185	13.01	group analysis	yes
	v026	0.871	11.63	group analysis	yes
	v206	0.867	13.97	group analysis	yes
	v106	0.706	13.38	group analysis	yes
	v024	0.502	10.11	group analysis	yes
	inflammatory mean	1.16475	13.92	2028
	v022	0.442	11.1	group analysis	yes
	v019	0.324	10.41	group analysis	yes
	suppressor mean	0.383	10.755	77
		^ p = 0.343	^ p = 0.886	^ diagnosis vs
		unresponsive vs	unresponsive vs	pre-infection
		uninfected	uninfected	(adj p < 0.05)
