# Supplementary material for: Mapping immune variation and var gene switching in naive hosts infected with Plasmodium falciparum
Source: eLife. 2021 Mar 2;10:e62800. doi: 10.7554/eLife.62800 (PMC7924948; doi:10.7554/eLife.62800)
Supplement: Supplementary file 3. — These data underpin the gene ontology network in Figure 2a. [file elife-62800-supp3.xlsx]

## Sheet: inflammatory response
	ID	symbol	description	EntrezID	log FC	adj p
	TC04001305.hg.1	CXCL10	chemokine (C-X-C motif) ligand 10	3627	4.64101	1.19e-11
	TC10001497.hg.1	ANKRD22	ankyrin repeat domain 22	118932	4.26778	3.55e-12
	TC11000467.hg.1	SERPING1	serpin peptidase inhibitor, clade G (C1 inhibitor), member 1	710	3.45839	2.44e-09
	TC01001172.hg.1	FCGR1A	Fc fragment of IgG, high affinity Ia, receptor (CD64)	2209	3.33943	2.89e-09
	TC01000794.hg.1	IFI44L	interferon-induced protein 44-like	10964	3.28562	0.000122301
	TC01001161.hg.1	FCGR1C	Fc fragment of IgG, high affinity Ic, receptor (CD64), pseudogene	100132417	3.24683	5.14e-09
	TC01003057.hg.1	FCGR1B	Fc fragment of IgG, high affinity Ib, receptor (CD64)	2210	3.16636	3.36e-09
	TC09000037.hg.1	CD274	CD274 molecule	29126	3.11219	1.33e-11
	TC03001904.hg.1	P2RY14	purinergic receptor P2Y, G-protein coupled, 14	9934	2.97906	6.43e-12
	TC02000034.hg.1	RSAD2	radical S-adenosyl methionine domain containing 2	91543	2.85349	0.000131374
	TC01002847.hg.1	GBP1	guanylate binding protein 1, interferon-inducible	2633	2.74049	6.48e-09
	TC01002850.hg.1	GBP5	guanylate binding protein 5	115362	2.63407	2.57e-08
	TC02000937.hg.1	TNFAIP6	tumor necrosis factor, alpha-induced protein 6	7130	2.58718	3.13e-07
	TC01002849.hg.1	GBP4	guanylate binding protein 4	115361	2.51661	1.74e-09
	TC01000836.hg.1	GBP1P1	guanylate binding protein 1, interferon-inducible pseudogene 1	400759	2.49644	2.06e-10
	TC11003507.hg.1	CARD17	caspase recruitment domain family, member 17	440068	2.42341	2.13e-08
	TC10000637.hg.1	IFIT3	interferon-induced protein with tetratricopeptide repeats 3	3437	2.3777	1.3e-05
	TC01000795.hg.1	IFI44	interferon-induced protein 44	10561	2.34527	0.000698197
	TC08000305.hg.1	IDO1	indoleamine 2,3-dioxygenase 1	3620	2.30515	3.48e-11
	TC10001535.hg.1	MYOF	myoferlin	26509	2.27082	2.52e-10
	TC04001304.hg.1	CXCL9	chemokine (C-X-C motif) ligand 9	4283	2.26348	5.8e-13
	TC01002412.hg.1	IFI6	interferon, alpha-inducible protein 6	2537	2.18072	1.01e-05
	TC10000639.hg.1	IFIT1	interferon-induced protein with tetratricopeptide repeats 1	3434	2.13568	0.00535875
	TC13000612.hg.1	EPSTI1	epithelial stromal interaction 1 (breast)	94240	2.13505	7.54e-07
	TC04000151.hg.1	LAP3	leucine aminopeptidase 3	51056	2.12378	4.05e-09
	TC09000038.hg.1	PDCD1LG2	programmed cell death 1 ligand 2	80380	2.05565	6.43e-12
	TC12000885.hg.1	OAS3	2'-5'-oligoadenylate synthetase 3, 100kDa	4940	1.94431	3.01e-05
	TC01001357.hg.1	SLAMF8	SLAM family member 8	56833	1.8936	7.94e-11
	TC04000485.hg.1	HERC5	HECT and RLD domain containing E3 ubiquitin protein ligase 5	51191	1.8653	0.00142635
	TC18000477.hg.1	PSTPIP2	proline-serine-threonine phosphatase interacting protein 2	9050	1.8607	3.88e-10
	TC14001509.hg.1	WARS	tryptophanyl-tRNA synthetase	7453	1.83256	1.76e-08
	TC19001575.hg.1	CEACAM1	carcinoembryonic antigen-related cell adhesion molecule 1 (biliary glycoprotein)	634	1.81309	5.78e-09
	TC02002624.hg.1	STAT1	signal transducer and activator of transcription 1, 91kDa	6772	1.80598	2.08e-07
	TC07001606.hg.1	SAMD9L	sterile alpha motif domain containing 9-like	219285	1.8057	9.09e-07
	TC03000634.hg.1	PARP14	poly (ADP-ribose) polymerase family, member 14	54625	1.79264	1.16e-06
	TC14001152.hg.1	GCH1	GTP cyclohydrolase 1	2643	1.74791	3.53e-09
	TC06001673.hg.1	ETV7	ets variant 7	51513	1.74644	8.8e-11
	TC04001476.hg.1	TIFA	TRAF-interacting protein with forkhead-associated domain	92610	1.70479	5.93e-13
	TC01000835.hg.1	GBP6	guanylate binding protein family, member 6	163351	1.7024	6.87e-11
	TC03001705.hg.1	PARP9	poly (ADP-ribose) polymerase family, member 9	83666	1.68006	3.37e-07
	TC02002481.hg.1	IFIH1	interferon induced with helicase C domain 1	64135	1.67044	6.78e-07
	TC01002845.hg.1	GBP3	guanylate binding protein 3	2635	1.67026	7.73e-07
	TC03001869.hg.1	PLSCR1	phospholipid scramblase 1	5359	1.65496	9.05e-06
	TC01003383.hg.1	AIM2	absent in melanoma 2	9447	1.64627	2.55e-08
	TC11000310.hg.1	PRRG4	proline rich Gla (G-carboxyglutamic acid) 4 (transmembrane)	79056	1.6057	1.16e-06
	TC17000077.hg.1	XAF1	XIAP associated factor 1	54739	1.59417	1.19e-05
	TC01006361.hg.1	GBP2	guanylate binding protein 2, interferon-inducible	2634	1.57532	1.26e-07
	TC12001602.hg.1	STAT2	signal transducer and activator of transcription 2, 113kDa	6773	1.56904	2.1e-07
	TC09001278.hg.1	FRMD3	FERM domain containing 3	257019	1.48101	3e-11
	TC10000636.hg.1	IFIT2	interferon-induced protein with tetratricopeptide repeats 2	3433	1.47741	0.000918483
	TC12000884.hg.1	OAS1	2'-5'-oligoadenylate synthetase 1, 40/46kDa	4938	1.45593	4.47e-05
	TC04001718.hg.1	DDX60	DEAD (Asp-Glu-Ala-Asp) box polypeptide 60	55601	1.43838	7.94e-05
	TC02001000.hg.1	DHRS9	dehydrogenase/reductase (SDR family) member 9	10170	1.43777	2.47e-07
	TC03002054.hg.1	LAMP3	lysosomal-associated membrane protein 3	27074	1.42735	6.83e-08
	TC12000886.hg.1	OAS2	2'-5'-oligoadenylate synthetase 2, 69/71kDa	4939	1.38927	5.37e-05
	TC11001795.hg.1	UBE2L6	ubiquitin-conjugating enzyme E2L 6	9246	1.38744	3e-11
	TC14000968.hg.1	PSME2	proteasome (prosome, macropain) activator subunit 2 (PA28 beta)	5721	1.38506	5.83e-09
	TC0X000141.hg.1	GK	glycerol kinase	2710	1.36732	7.93e-06
	TC03003211.hg.1	TNFSF10	tumor necrosis factor (ligand) superfamily, member 10	8743	1.35541	9.09e-08
	TC16000455.hg.1	LPCAT2	lysophosphatidylcholine acyltransferase 2	54947	1.35136	4.47e-09
	TC09000999.hg.1	DDX58	DEAD (Asp-Glu-Ala-Asp) box polypeptide 58	23586	1.34719	4.06e-05
	TC01005153.hg.1	EFCAB2	EF-hand calcium binding domain 2	84288	1.32982	1.07e-07
	TC17000545.hg.1	IFI35	interferon-induced protein 35	3430	1.32324	4.98e-08
	TC06001057.hg.1	STX11	syntaxin 11	8676	1.30554	8.2e-08
	TC03001031.hg.1	RTP4	receptor (chemosensory) transporter protein 4	64108	1.29161	5.29e-06
	TC12001569.hg.1	GPR84	G protein-coupled receptor 84	53831	1.29087	2.21e-09
	TC03000632.hg.1	DTX3L	deltex 3 like, E3 ubiquitin ligase	151636	1.27225	1.09e-08
	TC6_ssto_hap7000169.hg.1	TAP1	transporter 1, ATP-binding cassette, sub-family B (MDR/TAP)	6890	1.26702	1.05e-08
	TC09001211.hg.1	ALDH1A1	aldehyde dehydrogenase 1 family, member A1	216	1.26678	3.59e-05
	TC22000265.hg.1	APOL1	apolipoprotein L, 1	8542	1.2528	2.26e-11
	TC08000545.hg.1	RIPK2	receptor-interacting serine-threonine kinase 2	8767	1.25042	1.13e-10
	TC02001739.hg.1	EIF2AK2	eukaryotic translation initiation factor 2-alpha kinase 2	5610	1.23735	0.00092728
	TC17001979.hg.1	SECTM1	secreted and transmembrane 1	6398	1.23246	1.14e-07
	TC12000877.hg.1	TRAFD1	TRAF-type zinc finger domain containing 1	10906	1.22434	1.21e-09
	TC10000640.hg.1	IFIT5	interferon-induced protein with tetratricopeptide repeats 5	24138	1.22247	0.00016802
	TC0X000051.hg.1	TLR7	toll-like receptor 7	51284	1.21465	1.58e-05
	TC02005020.hg.1	CMPK2	cytidine monophosphate (UMP-CMP) kinase 2, mitochondrial	129607	1.21446	0.000106794
	TC11000117.hg.1	OR56B1	olfactory receptor, family 56, subfamily B, member 1	387748	1.20283	6.04e-07
	TC17000813.hg.1	KCNJ2	potassium inwardly-rectifying channel, subfamily J, member 2	3759	1.20205	0.00012528
	TC22001324.hg.1	APOL3	apolipoprotein L, 3	80833	1.20115	2.89e-09
	TC01002954.hg.1	SORT1	sortilin 1	6272	1.19566	4.36e-07
	TC22000702.hg.1	APOL2	apolipoprotein L, 2	23780	1.18229	1.05e-08
	TC19000174.hg.1	ICAM1	intercellular adhesion molecule 1	3383	1.18166	2.26e-11
	TC21000189.hg.1	MX1	MX dynamin-like GTPase 1	4599	1.18038	0.00524038
	TC22000262.hg.1	APOL6	apolipoprotein L, 6	80830	1.17354	6.05e-08
	TC07001779.hg.1	TFEC	transcription factor EC	22797	1.15975	2.59e-06
	TC15000580.hg.1	LACTB	lactamase, beta	114294	1.132	6.24e-08
	TC12002059.hg.1	OASL	2'-5'-oligoadenylate synthetase-like	8638	1.13055	0.000425607
	TC04000437.hg.1	ANXA3	annexin A3	306	1.12767	0.000582251
	TC15000671.hg.1	PML	promyelocytic leukemia	5371	1.12696	1.34e-10
	TC12000128.hg.1	CLEC6A	C-type lectin domain family 6, member A	93978	1.12465	6.23e-09
	TC12002079.hg.1	HCAR3	hydroxycarboxylic acid receptor 3	8843	1.12357	0.00137449
	TC10002196.hg.1	FAS	Fas cell surface death receptor	355	1.1202	3.27e-07
	TC09000035.hg.1	JAK2	Janus kinase 2	3717	1.10791	1.7e-06
	TC11003322.hg.1	CASP5	caspase 5, apoptosis-related cysteine peptidase	838	1.105	0.00555316
	TC17001924.hg.1	LGALS3BP	lectin, galactoside-binding, soluble, 3 binding protein	3959	1.08667	5.22e-09
	TC12002617.hg.1	P2RX7	purinergic receptor P2X, ligand-gated ion channel, 7	5027	1.08414	2.07e-05
	TC12002078.hg.1	HCAR2	hydroxycarboxylic acid receptor 2	338442	1.07592	0.0035025
	TC17002727.hg.1	SEPT4	septin 4	5414	1.07117	5.53e-08
	TC07001916.hg.1	PARP12	poly (ADP-ribose) polymerase family, member 12	64761	1.05749	7.8e-06
	TC16002034.hg.1	MT2A	metallothionein 2A	4502	1.03875	0.000126196
	TC02003335.hg.1	MTHFD2	methylenetetrahydrofolate dehydrogenase (NADP+ dependent) 2, methenyltetrahydrofolate cyclohydrolase	10797	1.01706	3.72e-08
	TC06001773.hg.1	PLA2G7	phospholipase A2, group VII (platelet-activating factor acetylhydrolase, plasma)	7941	1.01151	0.000552889
	TC11000572.hg.1	RARRES3	retinoic acid receptor responder (tazarotene induced) 3	5920	1.01149	9.05e-08
	TC19001275.hg.1	BST2	bone marrow stromal cell antigen 2	684	0.999062	3.44e-06
	TC22000191.hg.1	KREMEN1	kringle containing transmembrane protein 1	83999	0.99667	0.00210544
	TC11001309.hg.1	TRIM21	tripartite motif containing 21	6737	0.995199	5.41e-09
	TC07001761.hg.1	DOCK4	dedicator of cytokinesis 4	9732	0.991587	0.00296833
	TC08000326.hg.1	POLB	polymerase (DNA directed), beta	5423	0.986284	3.73e-07
	TC14002303.hg.1	FLVCR2	feline leukemia virus subgroup C cellular receptor family, member 2	55640	0.985746	5.51e-07
	TC03001851.hg.1	XRN1	5'-3' exoribonuclease 1	54464	0.985718	8.29e-08
	TC13000383.hg.1	TNFSF13B	tumor necrosis factor (ligand) superfamily, member 13b	10673	0.984503	0.000117814
	TC21000167.hg.1	KCNJ15	potassium inwardly-rectifying channel, subfamily J, member 15	3772	0.969858	0.0139644
	TC11001124.hg.1	GRAMD1B	GRAM domain containing 1B	57476	0.951443	6.81e-10
	TC19000470.hg.1	FFAR2	free fatty acid receptor 2	2867	0.95127	0.00656086
	TC04001719.hg.1	DDX60L	DEAD (Asp-Glu-Ala-Asp) box polypeptide 60-like	91351	0.948155	0.00191046
	TC05001767.hg.1	IRF1	interferon regulatory factor 1	3659	0.946977	1.31e-06
	TC10002930.hg.1	ERLIN1	ER lipid raft associated 1	10613	0.942746	4.04e-07
	TC12001171.hg.1	C3AR1	complement component 3a receptor 1	719	0.941777	7.5e-05
	TC02002821.hg.1	WDFY1	WD repeat and FYVE domain containing 1	57590	0.937625	1.8e-07
	TC0X000171.hg.1	CYBB	cytochrome b-245, beta polypeptide	1536	0.930796	2.28e-05
	TC17000918.hg.1	RNF213	ring finger protein 213	57674	0.928401	5.9e-06
	TC16000862.hg.1	SOCS1	suppressor of cytokine signaling 1	8651	0.927852	2.15e-08
	TC04000145.hg.1	CD38	CD38 molecule	952	0.925297	0.00116318
	TC17000383.hg.1	CCL2	chemokine (C-C motif) ligand 2	6347	0.924553	0.000205229
	TC07000840.hg.1	TMEM140	transmembrane protein 140	55281	0.920823	4.52e-05
	TC17002136.hg.1	LGALS9	lectin, galactoside-binding, soluble, 9	3965	0.919766	0.000148608
	TC14002288.hg.1	RNASE2	ribonuclease, RNase A family, 2 (liver, eosinophil-derived neurotoxin)	6036	0.919058	0.0224422
	TC18000248.hg.1	CNDP2	CNDP dipeptidase 2 (metallopeptidase M20 family)	55748	0.915962	1.68e-06
	TC08000814.hg.1	LY6E	lymphocyte antigen 6 complex, locus E	4061	0.910398	0.000264029
	TC0X000067.hg.1	BMX	BMX non-receptor tyrosine kinase	660	0.903766	0.000315748
	TC09000134.hg.1	DNAJA1	DnaJ (Hsp40) homolog, subfamily A, member 1	3301	0.899118	8.11e-08
	TC16001270.hg.1	MLKL	mixed lineage kinase domain-like	197259	0.897158	1.99e-07
	TC02000720.hg.1	IL1RN	interleukin 1 receptor antagonist	3557	0.895429	5.34e-06
	TC17000979.hg.1	SCARF1	scavenger receptor class F, member 1	8578	0.893414	8.67e-09
	TC01001607.hg.1	PLA2G4A	phospholipase A2, group IVA (cytosolic, calcium-dependent)	5321	0.887913	4.55e-05
	TC04000517.hg.1	DAPP1	dual adaptor of phosphotyrosine and 3-phosphoinositides	27071	0.883546	9.99e-05
	TC07001546.hg.1	FGL2	fibrinogen-like 2	10875	0.882598	0.000474729
	TC14000159.hg.1	PSME1	proteasome (prosome, macropain) activator subunit 1 (PA28 alpha)	5720	0.87186	1.06e-08
	TC07000969.hg.1	CUL1	cullin 1	8454	0.86979	1.43e-06
	TC01001974.hg.1	KMO	kynurenine 3-monooxygenase (kynurenine 3-hydroxylase)	8564	0.869093	2.89e-06
	TC02002219.hg.1	IL1B	interleukin 1, beta	3553	0.869075	0.000563489
	TC6_apd_hap1000130.hg.1	TAP2	transporter 2, ATP-binding cassette, sub-family B (MDR/TAP)	6891	0.85972	3.73e-07
	TC11001921.hg.1	BATF2	basic leucine zipper transcription factor, ATF-like 2	116071	0.85559	1.19e-08
	TC01006362.hg.1	GBP7	guanylate binding protein 7	388646	0.854106	2.99e-08
	TC12000793.hg.1	DRAM1	DNA-damage regulated autophagy modulator 1	55332	0.854041	1.31e-06
	TC6_mcf_hap5000202.hg.1	PSMB9	proteasome (prosome, macropain) subunit, beta type, 9	5698	0.853091	1.24e-06
	TC01001372.hg.1	SLAMF7	SLAM family member 7	57823	0.852857	0.00290356
	TC6_mann_hap4000216.hg.1	MICB	MHC class I polypeptide-related sequence B	4277	0.852123	1.64e-08
	TC6_mann_hap4000195.hg.1	C2	complement component 2	717	0.845554	1.48e-08
	TC05000604.hg.1	LMNB1	lamin B1	4001	0.845221	8.51e-05
	TC15000731.hg.1	PSMA4	proteasome (prosome, macropain) subunit, alpha type, 4	5685	0.845046	1.74e-06
	TC14001307.hg.1	NPC2	Niemann-Pick disease, type C2	10577	0.842896	3.51e-05
	TC03000831.hg.1	SUCNR1	succinate receptor 1	56670	0.841392	0.00281137
	TC07002205.hg.1	SNX10	sorting nexin 10	29887	0.841328	1.91e-05
	TC02002425.hg.1	NMI	N-myc (and STAT) interactor	9111	0.836131	0.000232024
	TC05000839.hg.1	GM2A	GM2 ganglioside activator	2760	0.834056	1.43e-05
	TC11003505.hg.1	CASP1	caspase 1, apoptosis-related cysteine peptidase	834	0.834011	0.000116802
	TC11003506.hg.1	CARD16	caspase recruitment domain family, member 16	114769	0.833404	0.000117894
	TC08001400.hg.1	NBN	nibrin	4683	0.832692	2.33e-06
	TC19000055.hg.1	GADD45B	growth arrest and DNA-damage-inducible, beta	4616	0.829022	1.19e-11
	TC06002263.hg.1	DYNLT1	dynein, light chain, Tctex-type 1	6993	0.828329	9.91e-06
	TC15000364.hg.1	SQRDL	sulfide quinone reductase-like (yeast)	58472	0.819326	1.17e-06
	TC13000539.hg.1	HSPH1	heat shock 105kDa/110kDa protein 1	10808	0.812807	0.000372982
	TC01001622.hg.1	RGS1	regulator of G-protein signaling 1	5996	0.808996	3.97e-07
	TC01000992.hg.1	MOV10	Mov10 RISC complex RNA helicase	4343	0.804263	5.53e-08
	TC19002531.hg.1	NAPA	N-ethylmaleimide-sensitive factor attachment protein, alpha	8775	0.800325	1.26e-06
	TC07000582.hg.1	LMTK2	lemur tyrosine kinase 2	22853	0.798974	7.82e-06
	TC07001934.hg.1	CLEC5A	C-type lectin domain family 5, member A	23601	0.7961	0.000224384
	TC6_apd_hap1000118.hg.1	HLA-DMA	major histocompatibility complex, class II, DM alpha	3108	0.792905	0.00020202
	TC09000585.hg.1	C9orf91	chromosome 9 open reading frame 91	203197	0.79044	3.03e-08
	TC18000223.hg.1	ZCCHC2	zinc finger, CCHC domain containing 2	54877	0.786872	0.00305294
	TC14000794.hg.1	TNFAIP2	tumor necrosis factor, alpha-induced protein 2	7127	0.786801	4.49e-05
	TC10001683.hg.1	KIAA1598	KIAA1598	57698	0.786404	0.00944021
	TC06001301.hg.1	TPMT	thiopurine S-methyltransferase	7172	0.784738	0.00163633
	TC07001016.hg.1	NUB1	negative regulator of ubiquitin-like proteins 1	51667	0.781848	8.45e-09
	TC03001283.hg.1	TRANK1	tetratricopeptide repeat and ankyrin repeat containing 1	9881	0.78123	4.91e-05
	TC19002629.hg.1	IFI30	interferon, gamma-inducible protein 30	10437	0.780337	0.00030379
	TC10002542.hg.1	ZNF438	zinc finger protein 438	220929	0.773853	9.27e-05
	TC16000939.hg.1	IGSF6	immunoglobulin superfamily, member 6	10261	0.772174	7.52e-06
	TC01003481.hg.1	CREG1	cellular repressor of E1A-stimulated genes 1	8804	0.769542	5.57e-05
	TC03001650.hg.1	ATG3	autophagy related 3	64422	0.769091	8.45e-09
	TC6_ssto_hap7000168.hg.1	PSMB8	proteasome (prosome, macropain) subunit, beta type, 8	5696	0.761717	3.56e-10
	TC03002038.hg.1	GNB4	guanine nucleotide binding protein (G protein), beta polypeptide 4	59345	0.761549	3.71e-05
	TC15001441.hg.1	DMXL2	Dmx-like 2	23312	0.756744	0.00261125
	TC06001669.hg.1	SLC26A8	solute carrier family 26 (anion exchanger), member 8	116369	0.750208	0.00270475
	TC02001354.hg.1	MRPL44	mitochondrial ribosomal protein L44	65080	0.747894	8.42e-09
	TC01001348.hg.1	IFI16	interferon, gamma-inducible protein 16	3428	0.747782	7.39e-05
	TC10001559.hg.1	PIK3AP1	phosphoinositide-3-kinase adaptor protein 1	118788	0.746411	3.98e-05
	TC17001899.hg.1	RHBDF2	rhomboid 5 homolog 2 (Drosophila)	79651	0.743774	1.47e-09
	TC01000099.hg.1	VAMP3	vesicle-associated membrane protein 3	9341	0.742464	1.27e-07
	TC14001030.hg.1	BAZ1A	bromodomain adjacent to zinc finger domain, 1A	11177	0.740936	1.76e-06
	TC6_apd_hap1000036.hg.1	TNF	tumor necrosis factor	7124	0.735721	0.000412854
	TC06001873.hg.1	MB21D1	Mab-21 domain containing 1	115004	0.732423	2.16e-07
	TC14000433.hg.1	SIPA1L1	signal-induced proliferation-associated 1 like 1	26037	0.73141	8.3e-05
	TC22000430.hg.1	KLHDC7B	kelch domain containing 7B	113730	0.730786	3.97e-07
	TC02005009.hg.1	SP140	SP140 nuclear body protein	11262	0.723862	7.54e-07
	TC13000741.hg.1	KCTD12	potassium channel tetramerization domain containing 12	115207	0.723225	0.00623168
	TC16000469.hg.1	MT1JP	metallothionein 1J, pseudogene	4498	0.722768	0.000322403
	TC6_ssto_hap7000172.hg.1	HLA-DPA1	major histocompatibility complex, class II, DP alpha 1	3113	0.721665	0.0280923
	TC18000300.hg.1	EPB41L3	erythrocyte membrane protein band 4.1-like 3	23136	0.721529	4.55e-05
	TC05000238.hg.1	IL31RA	interleukin 31 receptor A	133396	0.721113	5.93e-13
	TC04001306.hg.1	CXCL11	chemokine (C-X-C motif) ligand 11	6373	0.717014	8.8e-11
	TC16001108.hg.1	SNX20	sorting nexin 20	124460	0.716261	4.72e-10
	TC6_cox_hap2000079.hg.1	HSPA1B	heat shock 70kDa protein 1B	3304	0.715714	0.000379803
	TC16000442.hg.1	NOD2	nucleotide-binding oligomerization domain containing 2	64127	0.714862	0.000477799
	TC01001382.hg.1	FCER1G	Fc fragment of IgE, high affinity I, receptor for; gamma polypeptide	2207	0.712975	0.000190731
	TC07001605.hg.1	SAMD9	sterile alpha motif domain containing 9	54809	0.711237	0.00134214
	TC07002399.hg.1	NCF1B	neutrophil cytosolic factor 1B pseudogene	654816	0.710586	0.000230005
	TC08001288.hg.1	VCPIP1	valosin containing protein (p97)/p47 complex interacting protein 1	80124	0.709875	9.97e-06
	TC09000139.hg.1	CHMP5	charged multivesicular body protein 5	51510	0.707889	7.93e-05
	TC11000854.hg.1	DDIAS	DNA damage-induced apoptosis suppressor	220042	0.706439	1.71e-07
	TC6_mcf_hap5000230.hg.1	HLA-DMB	major histocompatibility complex, class II, DM beta	3109	0.705488	0.000120043
	TC12000309.hg.1	LRRK2	leucine-rich repeat kinase 2	120892	0.704992	0.0357136
	TC06000399.hg.1	HLA-DRA	major histocompatibility complex, class II, DR alpha	3122	0.699979	0.000506809
	TC07003026.hg.1	NCF1C	neutrophil cytosolic factor 1C pseudogene	654817	0.695579	8.67e-05
	TC13000682.hg.1	LINC00282	long intergenic non-protein coding RNA 282	283521	0.694369	0.0257019
	TC17001254.hg.1	LGALS9B	lectin, galactoside-binding, soluble, 9B	284194	0.693127	0.000842335
	TC14002294.hg.1	PSMA6	proteasome (prosome, macropain) subunit, alpha type, 6	5687	0.691541	0.000112568
	TC11003499.hg.1	COX8A	cytochrome c oxidase subunit VIIIA (ubiquitous)	1351	0.691179	0.00469742
	TC01002526.hg.1	MTF1	metal-regulatory transcription factor 1	4520	0.688878	1.08e-07
	TC02000445.hg.1	ALMS1P	Alstrom syndrome 1 pseudogene	200420	0.688376	0.000425607
	TC17000718.hg.1	PRR11	proline rich 11	55771	0.687784	1.3e-06
	TC09000490.hg.1	TDRD7	tudor domain containing 7	23424	0.686093	0.000675665
	TC20000821.hg.1	SAMHD1	SAM domain and HD domain 1	25939	0.685993	0.000526342
	TC12003076.hg.1	USP30-AS1	USP30 antisense RNA 1	100131733	0.682916	2.14e-05
	TC14000138.hg.1	LOC101926933	uncharacterized LOC101926933	101926933	0.682574	0.00237309
	TC02001159.hg.1	SPATS2L	spermatogenesis associated, serine-rich 2-like	26010	0.680107	0.000114959
	TC22000224.hg.1	LIMK2	LIM domain kinase 2	3985	0.678536	0.00675374
	TC01001568.hg.1	MR1	major histocompatibility complex, class I-related	3140	0.673886	9.67e-07
	TC03000255.hg.1	CCR2	chemokine (C-C motif) receptor 2	729230	0.670159	0.0100213
	TC16000474.hg.1	MT1H	metallothionein 1H	4496	0.669634	2.57e-05
	TC04000581.hg.1	ALPK1	alpha-kinase 1	80216	0.669268	0.0200076
	TC04000470.hg.1	AFF1	AF4/FMR2 family, member 1	4299	0.66844	1.62e-10
	TC17000466.hg.1	PSMB3	proteasome (prosome, macropain) subunit, beta type, 3	5691	0.668287	6.08e-06
	TC12001116.hg.1	PARP11	poly (ADP-ribose) polymerase family, member 11	57097	0.66591	7.86e-07
	TC16001433.hg.1	ITPRIPL2	inositol 1,4,5-trisphosphate receptor interacting protein-like 2	162073	0.665547	4.31e-06
	TC12001123.hg.1	C12orf4	chromosome 12 open reading frame 4	57102	0.664619	5.67e-07
	TC19001868.hg.1	TMEM150B	transmembrane protein 150B	284417	0.664484	8.09e-08
	TC17000217.hg.1	LGALS9C	lectin, galactoside-binding, soluble, 9C	654346	0.662726	0.00157291
	TC02000398.hg.1	PLEK	pleckstrin	5341	0.662198	2.28e-05
	TC16001284.hg.1	KARS	lysyl-tRNA synthetase	3735	0.662087	4.74e-06
	TC02000513.hg.1	VAMP5	vesicle-associated membrane protein 5	10791	0.661829	7.07e-09
	TC22000701.hg.1	APOL4	apolipoprotein L, 4	80832	0.657256	2.07e-09
	TC19001593.hg.1	PLAUR	plasminogen activator, urokinase receptor	5329	0.654651	0.000245139
	TC16000972.hg.1	ARHGAP17	Rho GTPase activating protein 17	55114	0.653687	4.42e-06
	TC19002630.hg.1	PSENEN	presenilin enhancer gamma secretase subunit	55851	0.652204	7.48e-07
	TC10000820.hg.1	TCF7L2	transcription factor 7-like 2 (T-cell specific, HMG-box)	6934	0.650591	0.00406991
	TC11002246.hg.1	CASP4	caspase 4, apoptosis-related cysteine peptidase	837	0.650285	0.000116903
	TC13000273.hg.1	KLF5	Kruppel-like factor 5 (intestinal)	688	0.648673	2.55e-07
	TC6_apd_hap1000101.hg.1	HLA-DRB1	major histocompatibility complex, class II, DR beta 1	3123	0.647265	0.0302932
	TC19002549.hg.1	NAPSB	napsin B aspartic peptidase, pseudogene	256236	0.64641	0.00514363
	TC02002853.hg.1	SP110	SP110 nuclear body protein	3431	0.645816	6.91e-05
	TC11001829.hg.1	PATL1	protein associated with topoisomerase II homolog 1 (yeast)	219988	0.641883	2.16e-08
	TC04001811.hg.1	LOC731424	uncharacterized LOC731424	731424	0.64161	0.000901709
	TC12001208.hg.1	CLEC2B	C-type lectin domain family 2, member B	9976	0.639025	0.00263349
	TC10000630.hg.1	LIPM	lipase, family member M	340654	0.637962	6.81e-10
	TC01003187.hg.1	HIST2H2BF	histone cluster 2, H2bf	440689	0.637771	0.0153557
	TC14001958.hg.1	GPR33	G protein-coupled receptor 33 (gene/pseudogene)	2856	0.634611	0.000647198
	TC19000712.hg.1	NUCB1	nucleobindin 1	4924	0.634125	1.65e-08
	TC09000463.hg.1	HIATL1	hippocampus abundant transcript-like 1	84641	0.633274	0.000319289
	TC07003353.hg.1	PSMA2	proteasome (prosome, macropain) subunit, alpha type, 2	5683	0.632625	0.00178149
	TC14001581.hg.1	ECRP	ribonuclease, RNase A family, 2 (liver, eosinophil-derived neurotoxin) pseudogene	643332	0.631215	0.0163047
	TC04001308.hg.1	SCARB2	scavenger receptor class B, member 2	950	0.630288	0.00290356
	TC16001135.hg.1	MT1G	metallothionein 1G	4495	0.6266	0.000350735
	TC09000572.hg.1	SLC31A1	solute carrier family 31 (copper transporter), member 1	1317	0.625935	0.000274735
	TC18000476.hg.1	EPG5	ectopic P-granules autophagy protein 5 homolog (C. elegans)	57724	0.625539	8.39e-08
	TC04000932.hg.1	HSP90AA4P	heat shock protein 90kDa alpha (cytosolic), class A member 4, pseudogene	3323	0.625516	0.000800372
	TC10001636.hg.1	OBFC1	oligonucleotide/oligosaccharide-binding fold containing 1	79991	0.620443	5.22e-09
	TC16001088.hg.1	NETO2	neuropilin (NRP) and tolloid (TLL)-like 2	81831	0.619288	2.19e-05
	TC11001241.hg.1	IRF7	interferon regulatory factor 7	3665	0.618211	1.34e-05
	TC11001820.hg.1	OR5A2	olfactory receptor, family 5, subfamily A, member 2	219981	0.617057	0.000500949
	TC16002071.hg.1	MVP	major vault protein	9961	0.613943	1.04e-05
	TC05000186.hg.1	CARD6	caspase recruitment domain family, member 6	84674	0.612816	5.74e-07
	TC11001341.hg.1	TRIM5	tripartite motif containing 5	85363	0.612685	2.2e-06
	TC16002035.hg.1	MT1A	metallothionein 1A	4489	0.612395	0.000637251
	TC01000978.hg.1	C1orf162	chromosome 1 open reading frame 162	128346	0.608122	0.00393547
	TC0X001624.hg.1	SAT1	spermidine/spermine N1-acetyltransferase 1	6303	0.606251	0.0153569
	TC03000257.hg.1	CCRL2	chemokine (C-C motif) receptor-like 2	9034	0.60587	1.2e-07
	TC13000681.hg.1	DHRS12	dehydrogenase/reductase (SDR family) member 12	79758	0.605138	0.000334682
	TC19002313.hg.1	CD209	CD209 molecule	30835	0.604387	1.62e-05
	TC16000456.hg.1	CAPNS2	calpain, small subunit 2	84290	0.602095	0.00468751
	TC20000979.hg.1	ZBP1	Z-DNA binding protein 1	81030	0.600698	0.00224407
	TC06001220.hg.1	SERPINB9	serpin peptidase inhibitor, clade B (ovalbumin), member 9	5272	0.597285	0.00354438
	TC12001678.hg.1	GNS	glucosamine (N-acetyl)-6-sulfatase	2799	0.593453	0.0031515
	TC02001986.hg.1	NAT8B	N-acetyltransferase 8B (GCN5-related, putative, gene/pseudogene)	51471	0.591399	3.57e-05
	TC0X002337.hg.1	ACSL4	acyl-CoA synthetase long-chain family member 4	2182	0.589718	0.00141071
	TC17000570.hg.1	GRN	granulin	2896	0.588756	0.00182419
	TC17001917.hg.1	SOCS3	suppressor of cytokine signaling 3	9021	0.585713	2.09e-05
	TC13000091.hg.1	POMP	proteasome maturation protein	51371	0.584191	4.55e-07
	TC01000145.hg.1	FBXO6	F-box protein 6	26270	0.583077	4.72e-08
	TC06000545.hg.1	CMTR1	cap methyltransferase 1	23070	0.580082	7.27e-05
	TC17001833.hg.1	KCNJ2-AS1	KCNJ2 antisense RNA 1 (head to head)	400617	0.578044	0.00172746
	TC16000158.hg.1	CIITA	class II, major histocompatibility complex, transactivator	4261	0.577901	4.14e-05
	TC07000459.hg.1	NCF1	neutrophil cytosolic factor 1	653361	0.576765	0.000719655
	TC17001716.hg.1	TRIM25	tripartite motif containing 25	7706	0.574592	0.00628379
	TC6_cox_hap2000194.hg.1	HLA-DRB6	major histocompatibility complex, class II, DR beta 6 (pseudogene)	3128	0.574525	0.0043447
	TC03000766.hg.1	ATP1B3	ATPase, Na+/K+ transporting, beta 3 polypeptide	483	0.572913	0.000205229
	TC09001710.hg.1	FCN1	ficolin (collagen/fibrinogen domain containing) 1	2219	0.57273	0.0093883
	TC22000215.hg.1	TCN2	transcobalamin II	6948	0.57213	4.31e-06
	TC17001563.hg.1	DUSP3	dual specificity phosphatase 3	1845	0.571425	1.71e-07
	TC04000577.hg.1	C4orf32	chromosome 4 open reading frame 32	132720	0.570444	2.16e-10
	TC19000134.hg.1	MCEMP1	mast cell-expressed membrane protein 1	199675	0.566407	0.0371994
	TC20000833.hg.1	TGM2	transglutaminase 2	7052	0.56506	0.00292044
	TC05001604.hg.1	MCTP1	multiple C2 domains, transmembrane 1	79772	0.565035	0.00519746
	TC17000103.hg.1	CD68	CD68 molecule	968	0.564594	0.0119424
	TC12003210.hg.1	ETV6	ets variant 6	2120	0.564488	1.56e-07
	TC04002235.hg.1	IL15	interleukin 15	3600	0.564349	0.0205825
	TC01003295.hg.1	ADAR	adenosine deaminase, RNA-specific	103	0.560594	0.000109355
	TC22001480.hg.1	CECR1	cat eye syndrome chromosome region, candidate 1	51816	0.560327	0.0253917
	TC0X000939.hg.1	CXorf21	chromosome X open reading frame 21	80231	0.559375	0.000264987
	TC12001079.hg.1	SLC6A12	solute carrier family 6 (neurotransmitter transporter), member 12	6539	0.559191	1.01e-08
	TC07001264.hg.1	NT5C3A	5'-nucleotidase, cytosolic IIIA	51251	0.557812	0.0443677
	TC0X000052.hg.1	TLR8	toll-like receptor 8	51311	0.557633	0.00708355
	TC10000163.hg.1	MSRB2	methionine sulfoxide reductase B2	22921	0.557081	6.56e-08
	TC05001295.hg.1	FYB	FYN binding protein	2533	0.556769	1.17e-07
	TC19000627.hg.1	BCL3	B-cell CLL/lymphoma 3	602	0.556764	6.48e-07
	TC20000365.hg.1	CD40	CD40 molecule, TNF receptor superfamily member 5	958	0.556188	5.34e-08
	TC04001805.hg.1	IRF2	interferon regulatory factor 2	3660	0.553532	4.78e-07
	TC09001571.hg.1	DENND1A	DENN/MADD domain containing 1A	57706	0.553395	2.67e-05
	TC6_mcf_hap5000226.hg.1	HLA-DPB2	major histocompatibility complex, class II, DP beta 2 (pseudogene)	3116	0.551684	0.0494639
	TC01001823.hg.1	HLX	H2.0-like homeobox	3142	0.549436	8.35e-05
	TC02002577.hg.1	SESTD1	SEC14 and spectrin domains 1	91404	0.54781	0.00103105
	TC16000384.hg.1	ZNF267	zinc finger protein 267	10308	0.547685	7.72e-06
	TC20000844.hg.1	MAFB	v-maf avian musculoaponeurotic fibrosarcoma oncogene homolog B	9935	0.547464	0.000350821
	TC12001843.hg.1	LTA4H	leukotriene A4 hydrolase	4048	0.546844	0.0218452
	TC0X001020.hg.1	PIM2	Pim-2 proto-oncogene, serine/threonine kinase	11040	0.546644	4.16e-06
	TC20000924.hg.1	ZNFX1	zinc finger, NFX1-type containing 1	57169	0.546401	1.88e-06
	TC03000630.hg.1	CSTA	cystatin A (stefin A)	1475	0.546053	0.0128706
	TC17000631.hg.1	CALCOCO2	calcium binding and coiled-coil domain 2	10241	0.541672	4.08e-08
	TC02000902.hg.1	KYNU	kynureninase	8942	0.54069	0.0410506
	TC02001176.hg.1	CASP10	caspase 10, apoptosis-related cysteine peptidase	843	0.540296	0.000600459
	TC10000825.hg.1	CASP7	caspase 7, apoptosis-related cysteine peptidase	840	0.53984	1.32e-08
	TC22000271.hg.1	CSF2RB	colony stimulating factor 2 receptor, beta, low-affinity (granulocyte-macrophage)	1439	0.539663	0.00351679
	TC0X000025.hg.1	STS	steroid sulfatase (microsomal), isozyme S	412	0.539138	3.57e-05
	TC12000028.hg.1	FKBP4	FK506 binding protein 4, 59kDa	2288	0.538735	5.86e-06
	TC22001500.hg.1	TYMP	thymidine phosphorylase	1890	0.538692	6.65e-05
	TC03001906.hg.1	P2RY13	purinergic receptor P2Y, G-protein coupled, 13	53829	0.538533	0.00353739
	TC18000039.hg.1	RAB12	RAB12, member RAS oncogene family	201475	0.537492	0.000117703
	TC15000335.hg.1	PDIA3	protein disulfide isomerase family A, member 3	2923	0.53747	0.00341231
	TC12001857.hg.1	SLC9A7P1	solute carrier family 9, subfamily A (NHE7, cation proton antiporter 7), member 7 pseudogene 1	121456	0.537385	0.0274827
	TC01003546.hg.1	KIAA0040	KIAA0040	9674	0.537114	1.12e-09
	TC11003482.hg.1	SLC43A3	solute carrier family 43, member 3	29015	0.536984	0.000152615
	TC12002016.hg.1	WSB2	WD repeat and SOCS box containing 2	55884	0.536514	2.28e-08
	TC15001824.hg.1	HAPLN3	hyaluronan and proteoglycan link protein 3	145864	0.535953	4.57e-07
	TC09001875.hg.1	ANXA2P2	annexin A2 pseudogene 2	304	0.535622	0.0321376
	TC01005928.hg.1	SELL	selectin L	6402	0.535575	0.000664877
	TC10001362.hg.1	PPA1	pyrophosphatase (inorganic) 1	5464	0.534029	0.0132126
	TC08000487.hg.1	LY96	lymphocyte antigen 96	23643	0.531621	0.032814
	TC20000302.hg.1	TOP1.00	topoisomerase (DNA) I	7150	0.531313	0.00114468
	TC06000117.hg.1	KDM1B	lysine (K)-specific demethylase 1B	221656	0.529545	0.00210269
	TC01003396.hg.1	KCNJ10	potassium inwardly-rectifying channel, subfamily J, member 10	3766	0.529058	6.89e-05
	TC10001394.hg.1	MICU1	mitochondrial calcium uptake 1	10367	0.526155	1.34e-06
	TC01001829.hg.1	MIA3	melanoma inhibitory activity family, member 3	375056	0.52533	2.01e-05
	TC05001518.hg.1	LHFPL2	lipoma HMGIC fusion partner-like 2	10184	0.525028	1.19e-10
	TC07003314.hg.1	PILRA	paired immunoglobin-like type 2 receptor alpha	29992	0.524216	0.00124824
	TC17000357.hg.1	ADAP2	ArfGAP with dual PH domains 2	55803	0.523947	0.000746588
	TC07001910.hg.1	ZC3HAV1	zinc finger CCCH-type, antiviral 1	56829	0.522625	7.13e-05
	TC17001531.hg.1	STAT3	signal transducer and activator of transcription 3 (acute-phase response factor)	6774	0.521864	2.62e-07
	TC01001777.hg.1	ATF3	activating transcription factor 3	467	0.521468	5.24e-08
	TC12001269.hg.1	PLBD1	phospholipase B domain containing 1	79887	0.52014	0.0192133
	TC04000477.hg.1	HSP90AB3P	heat shock protein 90kDa alpha (cytosolic), class B member 3, pseudogene	3327	0.519465	0.00995083
	TC16002075.hg.1	MT1L	metallothionein 1L (gene/pseudogene)	4500	0.518251	0.0115471
	TC19001721.hg.1	RRAS	related RAS viral (r-ras) oncogene homolog	6237	0.517205	0.0142003
	TC10000779.hg.1	SLK	STE20-like kinase	9748	0.515347	6.89e-05
	TC04001655.hg.1	ANXA2P1	annexin A2 pseudogene 1	303	0.515039	0.0266512
	TC14000884.hg.1	TEP1	telomerase-associated protein 1	7011	0.513625	1.39e-06
	TC6_ssto_hap7000106.hg.1	IFITM4P	interferon induced transmembrane protein 4 pseudogene	340198	0.513081	0.00746651
	TC15001358.hg.1	SPPL2A	signal peptide peptidase like 2A	84888	0.51298	9.74e-05
	TC11001794.hg.1	TIMM10	translocase of inner mitochondrial membrane 10 homolog (yeast)	26519	0.512881	4.7e-05
	TC03000394.hg.1	ATXN7	ataxin 7	6314	0.512877	1.07e-07
	TC01002903.hg.1	DPYD	dihydropyrimidine dehydrogenase	1806	0.511418	0.00274962
	TC01002608.hg.1	TESK2	testis-specific kinase 2	10420	0.510109	9.86e-07
	TC6_qbl_hap6000069.hg.1	HSPA1A	heat shock 70kDa protein 1A	3303	0.508754	0.000815735
	TC17001019.hg.1	ANKFY1	ankyrin repeat and FYVE domain containing 1	51479	0.507019	4.35e-05
	TC14000523.hg.1	GPR65	G protein-coupled receptor 65	8477	0.506618	8.25e-05
	TC06000633.hg.1	CD2AP	CD2-associated protein	23607	0.505321	0.00118783
	TC02000331.hg.1	VRK2	vaccinia related kinase 2	7444	0.50532	1.59e-06
	TC06004141.hg.1	SOD2	superoxide dismutase 2, mitochondrial	6648	0.50325	0.033281
	TC10000145.hg.1	PLXDC2	plexin domain containing 2	84898	0.502315	0.00316549
	TC09000400.hg.1	CTSL	cathepsin L	1514	0.50064	8.78e-05
	TC01000733.hg.1	PDE4B	phosphodiesterase 4B, cAMP-specific	5142	0.500484	2.71e-07
	TC07000159.hg.1	NFE2L3	nuclear factor, erythroid 2-like 3	9603	0.500372	0.0484775
	TC01002478.hg.1	RNF19B	ring finger protein 19B	127544	0.499625	0.00146181
	TC10000391.hg.1	ANXA2P3	annexin A2 pseudogene 3	305	0.499152	0.00146668
	TC22001501.hg.1	ODF3B	outer dense fiber of sperm tails 3B	440836	0.498524	0.000322083
	TC04001514.hg.1	ANXA5	annexin A5	308	0.49669	0.0346084
	TC02002132.hg.1	MITD1	MIT, microtubule interacting and transport, domain containing 1	129531	0.496074	9.01e-05
	TC0X000050.hg.1	PRPS2	phosphoribosyl pyrophosphate synthetase 2	5634	0.495955	0.00260107
	TC13000190.hg.1	RB1	retinoblastoma 1	5925	0.494135	0.0012684
	TC06000919.hg.1	FAM26F	family with sequence similarity 26, member F	441168	0.492987	7.85e-06
	TC06001027.hg.1	TNFAIP3	tumor necrosis factor, alpha-induced protein 3	7128	0.492409	0.00222156
	TC02002538.hg.1	CIR1	corepressor interacting with RBPJ, 1	9541	0.4924	0.00147411
	TC06000161.hg.1	TRIM38	tripartite motif containing 38	10475	0.49181	0.00138631
	TC16002086.hg.1	PSMB10	proteasome (prosome, macropain) subunit, beta type, 10	5699	0.491041	2.99e-07
	TC13000199.hg.1	PHF11	PHD finger protein 11	51131	0.490951	0.000215915
	TC05001784.hg.1	C5orf15	chromosome 5 open reading frame 15	56951	0.490847	4.35e-06
	TC16000482.hg.1	NLRC5	NLR family, CARD domain containing 5	84166	0.490741	0.000439453
	TC17000702.hg.1	SCPEP1	serine carboxypeptidase 1	59342	0.48886	0.00475014
	TC08000835.hg.1	GRINA	glutamate receptor, ionotropic, N-methyl D-aspartate-associated protein 1 (glutamate binding)	2907	0.48813	0.0231451
	TC16001356.hg.1	VPS9D1	VPS9 domain containing 1	9605	0.486708	1.14e-07
	TC11000585.hg.1	STIP1	stress-induced phosphoprotein 1	10963	0.485584	0.00146341
	TC15001505.hg.1	ANXA2	annexin A2	302	0.484923	0.0372889
	TC02002492.hg.1	GALNT3	polypeptide N-acetylgalactosaminyltransferase 3	2591	0.482236	0.00420919
	TC06003493.hg.1	DTNBP1	dystrobrevin binding protein 1	84062	0.481455	1.8e-07
	TC11000565.hg.1	TMEM179B	transmembrane protein 179B	374395	0.480259	0.0018254
	TC20000928.hg.1	B4GALT5	UDP-Gal:betaGlcNAc beta 1,4- galactosyltransferase, polypeptide 5	9334	0.479219	0.0188823
	TC17002865.hg.1	TNFSF13	tumor necrosis factor (ligand) superfamily, member 13	8741	0.47873	0.00368675
	TC14001526.hg.1	HSP90AA1	heat shock protein 90kDa alpha (cytosolic), class A member 1	3320	0.478431	0.00264525
	TC01001847.hg.1	CNIH4	cornichon family AMPA receptor auxiliary protein 4	29097	0.478309	0.000170337
	TC20001730.hg.1	C20orf24	chromosome 20 open reading frame 24	55969	0.47702	1.69e-05
	TC06001584.hg.1	TAPBP	TAP binding protein (tapasin)	6892	0.476746	3.4e-08
	TC17001029.hg.1	CXCL16	chemokine (C-X-C motif) ligand 16	58191	0.47628	0.00354879
	TC20000010.hg.1	RBCK1	RanBP-type and C3HC4-type zinc finger containing 1	10616	0.474635	5.29e-08
	TC11000483.hg.1	FAM111A	family with sequence similarity 111, member A	63901	0.472999	0.000372209
	TC06000909.hg.1	MARCKS	myristoylated alanine-rich protein kinase C substrate	4082	0.469734	0.022848
	TC0X001357.hg.1	ELF4	E74-like factor 4 (ets domain transcription factor)	2000	0.467864	7.09e-07
	TC20000361.hg.1	CTSA	cathepsin A	5476	0.466953	1.19e-05
	TC11002194.hg.1	SMCO4	single-pass membrane protein with coiled-coil domains 4	56935	0.466737	2.99e-08
	TC09001416.hg.1	ERP44	endoplasmic reticulum protein 44	23071	0.465693	0.00456967
	TC02002123.hg.1	TMEM131	transmembrane protein 131	23505	0.465568	4.89e-05
	TC06000950.hg.1	SMPDL3A	sphingomyelin phosphodiesterase, acid-like 3A	10924	0.465296	0.000226993
	TC02000500.hg.1	TMSB10	thymosin beta 10	9168	0.463801	0.0053094
	TC0X000339.hg.1	UBQLN2	ubiquilin 2	29978	0.463565	0.000113339
	TC16000472.hg.1	MT1B	metallothionein 1B	4490	0.463045	0.0033828
	TC03000329.hg.1	ALAS1	aminolevulinate, delta-, synthase 1	211	0.461315	3.08e-07
	TC19000882.hg.1	LILRB4	leukocyte immunoglobulin-like receptor, subfamily B (with TM and ITIM domains), member 4	11006	0.461135	0.00181903
	TC11002538.hg.1	TRIM78P	tripartite motif containing 78, pseudogene	117852	0.460938	0.0122924
	TC02001377.hg.1	SP100	SP100 nuclear antigen	6672	0.459352	0.000489094
	TC12001570.hg.1	ZNF385A	zinc finger protein 385A	25946	0.459202	0.0339464
	TC05002050.hg.1	LCP2	lymphocyte cytosolic protein 2 (SH2 domain containing leukocyte protein of 76kDa)	3937	0.458794	1.61e-06
	TC20001553.hg.1	EDEM2	ER degradation enhancer, mannosidase alpha-like 2	55741	0.45766	0.000100252
	TC11001818.hg.1	MPEG1	macrophage expressed 1	219972	0.457397	0.0253697
	TC02001086.hg.1	SSFA2	sperm specific antigen 2	6744	0.455467	0.000802223
	TC05001012.hg.1	PRELID1	PRELI domain containing 1	27166	0.454858	0.000495854
	TC16000473.hg.1	MT1F	metallothionein 1F	4494	0.454635	0.0350219
	TC11002123.hg.1	PAK1	p21 protein (Cdc42/Rac)-activated kinase 1	5058	0.453395	0.0059505
	TC02000968.hg.1	TANK	TRAF family member-associated NFKB activator	10010	0.452735	0.0290512
	TC06001219.hg.1	SERPINB9P1	serpin peptidase inhibitor, clade B (ovalbumin), member 9, pseudogene 1	221756	0.450615	0.000328697
	TC06000615.hg.1	HSP90AB1	heat shock protein 90kDa alpha (cytosolic), class B member 1	3326	0.450462	0.0291306
	TC11000133.hg.1	ILK	integrin-linked kinase	3611	0.449778	2.21e-05
	TC20000393.hg.1	RNF114	ring finger protein 114	55905	0.449689	1.7e-05
	TC03000187.hg.1	MYD88	myeloid differentiation primary response 88	4615	0.448862	0.000163451
	TC17001523.hg.1	DHX58	DEXH (Asp-Glu-X-His) box polypeptide 58	79132	0.448545	0.00741679
	TC06000538.hg.1	FGD2	FYVE, RhoGEF and PH domain containing 2	221472	0.44818	0.00420341
	TC09000202.hg.1	GLIPR2	GLI pathogenesis-related 2	152007	0.447785	7.42e-06
	TC16000476.hg.1	MT1X	metallothionein 1X	4501	0.447518	0.00534358
	TC20001035.hg.1	HELZ2	helicase with zinc finger 2, transcriptional coactivator	85441	0.445925	8.57e-05
	TC01001721.hg.1	SRGAP2	SLIT-ROBO Rho GTPase activating protein 2	23380	0.445532	0.00377037
	TC05000701.hg.1	EGR1	early growth response 1	1958	0.445464	0.000228013
	TC01003871.hg.1	TLR5	toll-like receptor 5	7100	0.442678	0.0124789
	TC07001363.hg.1	TNS3	tensin 3	64759	0.442387	3.21e-05
	TC01000314.hg.1	CLIC4	chloride intracellular channel 4	25932	0.441373	0.0105921
	TC01001178.hg.1	PLEKHO1	pleckstrin homology domain containing, family O member 1	51177	0.441371	1.86e-06
	TC05001936.hg.1	CD74	CD74 molecule, major histocompatibility complex, class II invariant chain	972	0.441161	0.00183117
	TC04001706.hg.1	GK3P	glycerol kinase 3 pseudogene	2713	0.439327	0.0456369
	TC12001470.hg.1	TUBA1B	tubulin, alpha 1b	10376	0.439249	0.000677377
	TC01000023.hg.1	ISG15	ISG15 ubiquitin-like modifier	9636	0.439009	0.00413953
	TC11001362.hg.1	TPP1	tripeptidyl peptidase I	1200	0.438747	0.00268485
	TC07000075.hg.1	C1GALT1	core 1 synthase, glycoprotein-N-acetylgalactosamine 3-beta-galactosyltransferase 1	56913	0.436874	0.000329828
	TC0X000087.hg.1	SCML1	sex comb on midleg-like 1 (Drosophila)	6322	0.436798	0.0287213
	TC02001296.hg.1	GPBAR1	G protein-coupled bile acid receptor 1	151306	0.436309	0.00109489
	TC02002644.hg.1	PGAP1	post-GPI attachment to proteins 1	80055	0.435686	0.000751561
	TC6_qbl_hap6000183.hg.1	HLA-DQB1	major histocompatibility complex, class II, DQ beta 1	3119	0.434949	0.0253997
	TC07000485.hg.1	HSPB1	heat shock 27kDa protein 1	3315	0.431905	1.38e-05
	TC09001293.hg.1	ZCCHC6	zinc finger, CCHC domain containing 6	79670	0.431836	0.0357233
	TC08000997.hg.1	LONRF1	LON peptidase N-terminal domain and ring finger 1	91694	0.431167	0.000118018
	TC07000450.hg.1	LIMK1	LIM domain kinase 1	3984	0.428511	7.92e-05
	TC06000186.hg.1	BTN3A1	butyrophilin, subfamily 3, member A1	11119	0.426582	0.00507818
	TC10001505.hg.1	LIPA	lipase A, lysosomal acid, cholesterol esterase	3988	0.426356	0.0310074
	TC01002320.hg.1	EIF4G3	eukaryotic translation initiation factor 4 gamma, 3	8672	0.426255	7.93e-05
	TC18000180.hg.1	ME2	malic enzyme 2, NAD(+)-dependent, mitochondrial	4200	0.426098	0.00829934
	TC19001656.hg.1	SLC1A5	solute carrier family 1 (neutral amino acid transporter), member 5	6510	0.425942	0.0378812
	TC07000930.hg.1	GSTK1	glutathione S-transferase kappa 1	373156	0.422985	5.24e-06
	TC21000215.hg.1	AGPAT3	1-acylglycerol-3-phosphate O-acyltransferase 3	56894	0.422281	2.25e-08
	TC19002690.hg.1	COPE	coatomer protein complex, subunit epsilon	11316	0.421104	0.0243552
	TC14000388.hg.1	MTHFD1	methylenetetrahydrofolate dehydrogenase (NADP+ dependent) 1, methenyltetrahydrofolate cyclohydrolase, formyltetrahydrofolate synthetase	4522	0.420516	0.00318158
	TC14000346.hg.1	PSMA3	proteasome (prosome, macropain) subunit, alpha type, 3	5684	0.419943	0.00684745
	TC07000064.hg.1	USP42	ubiquitin specific peptidase 42	84132	0.418525	3.21e-07
	TC07000267.hg.1	BLVRA	biliverdin reductase A	644	0.418457	0.00315173
	TC11003457.hg.1	ARL2.00	ADP-ribosylation factor-like 2	402	0.417444	0.00695367
	TC12000570.hg.1	TBK1	TANK-binding kinase 1	29110	0.416728	0.00434637
	TC07001004.hg.1	GIMAP4	GTPase, IMAP family member 4	55303	0.416011	0.00359259
	TC05003436.hg.1	RAB24	RAB24, member RAS oncogene family	53917	0.414332	0.0179258
	TC15000343.hg.1	TRIM69	tripartite motif containing 69	140691	0.414267	1.53e-06
	TC08000767.hg.1	EFR3A	EFR3 homolog A (S. cerevisiae)	23167	0.413958	0.0110944
	TC11000011.hg.1	IFITM1	interferon induced transmembrane protein 1	8519	0.413841	0.000373561
	TC04001486.hg.1	CAMK2D	calcium/calmodulin-dependent protein kinase II delta	817	0.41367	0.0153027
	TC11000466.hg.1	SMTNL1	smoothelin-like 1	219537	0.413228	0.000668855
	TC10001702.hg.1	PRDX3	peroxiredoxin 3	10935	0.413128	0.0346925
	TC0X000257.hg.1	WAS	Wiskott-Aldrich syndrome	7454	0.4106	0.000512439
	TC16000226.hg.1	LYRM1	LYR motif containing 1	57149	0.410259	1.23e-06
	TC04000768.hg.1	FHDC1	FH2 domain containing 1	85462	0.408147	0.0412427
	TC04002474.hg.1	FBXL5	F-box and leucine-rich repeat protein 5	26234	0.407856	0.00431666
	TC05001519.hg.1	ARSB	arylsulfatase B	411	0.407273	7.46e-05
	TC14000939.hg.1	RBM23	RNA binding motif protein 23	55147	0.406736	0.000264987
	TC19002654.hg.1	LILRB1	leukocyte immunoglobulin-like receptor, subfamily B (with TM and ITIM domains), member 1	10859	0.40592	0.00192343
	TC12002216.hg.1	NECAP1	NECAP endocytosis associated 1	25977	0.405725	0.000811609
	TC11001941.hg.1	AP5B1	adaptor-related protein complex 5, beta 1 subunit	91056	0.405634	0.0199381
	TC17001081.hg.1	GABARAP	GABA(A) receptor-associated protein	11337	0.404905	1.24e-05
	TC04000274.hg.1	ATP10D	ATPase, class V, type 10D	57205	0.403995	0.00274962
	TC19002463.hg.1	TYROBP	TYRO protein tyrosine kinase binding protein	7305	0.403686	0.00851342
	TC10000813.hg.1	ACSL5	acyl-CoA synthetase long-chain family member 5	51703	0.403208	0.014999
	TC12002384.hg.1	BLOC1S1	biogenesis of lysosomal organelles complex-1, subunit 1	2647	0.402959	4.44e-05
	TC19002608.hg.1	NUP62	nucleoporin 62kDa	23636	0.402801	0.000724115
	TC15001444.hg.1	LYSMD2	LysM, putative peptidoglycan-binding, domain containing 2	256586	0.40251	1.36e-05
	TC02002256.hg.1	TMEM185B	transmembrane protein 185B	79134	0.402354	0.00154361
	TC04001496.hg.1	SEC24D	SEC24 family member D	9871	0.40199	0.000385026
	TC15001697.hg.1	TBC1D2B	TBC1 domain family, member 2B	23102	0.401047	1.22e-06
	TC0X000998.hg.1	CFP	complement factor properdin	5199	0.399224	0.0213335
	TC08001565.hg.1	SNTB1	syntrophin, beta 1 (dystrophin-associated protein A1, 59kDa, basic component 1)	6641	0.398118	2.21e-05
	TC11000650.hg.1	BANF1	barrier to autointegration factor 1	8815	0.397785	0.0141116
	TC19000191.hg.1	LDLR	low density lipoprotein receptor	3949	0.394937	0.0122627
	TC11000976.hg.1	RAB39A	RAB39A, member RAS oncogene family	54734	0.394385	0.00416199
	TC01001767.hg.1	DTL	denticleless E3 ubiquitin protein ligase homolog (Drosophila)	51514	0.393965	0.0311634
	TC05001690.hg.1	TMED7-TICAM2	TMED7-TICAM2 readthrough	100302736	0.393871	0.00351679
	TC10000801.hg.1	DUSP5	dual specificity phosphatase 5	1847	0.393675	9.54e-05
	TC0X001177.hg.1	CYSLTR1	cysteinyl leukotriene receptor 1	10800	0.393628	0.0398999
	TC02000245.hg.1	GALM	galactose mutarotase (aldose 1-epimerase)	130589	0.392199	0.015571
	TC04002922.hg.1	RASGEF1B	RasGEF domain family, member 1B	153020	0.39177	0.00754085
	TC09002685.hg.1	HIATL2	hippocampus abundant transcript-like 2	84278	0.389254	0.00172632
	TC08001548.hg.1	EXT1	exostosin glycosyltransferase 1	2131	0.388944	0.0146712
	TC10001037.hg.1	USP6NL	USP6 N-terminal like	9712	0.388825	0.000413159
	TC01000147.hg.1	AGTRAP	angiotensin II receptor-associated protein	57085	0.388193	0.00410601
	TC06001387.hg.1	HIST1H2BK	histone cluster 1, H2bk	85236	0.388088	0.0376494
	TC0X000921.hg.1	ACOT9	acyl-CoA thioesterase 9	23597	0.387744	0.0165292
	TC17001075.hg.1	ASGR2	asialoglycoprotein receptor 2	433	0.387362	0.0479848
	TC05001608.hg.1	GLRX	glutaredoxin (thioltransferase)	2745	0.385549	0.00533188
	TC14000161.hg.1	IRF9	interferon regulatory factor 9	10379	0.384719	3.95e-05
	TC14001036.hg.1	NFKBIA	nuclear factor of kappa light polypeptide gene enhancer in B-cells inhibitor, alpha	4792	0.38392	0.00528417
	TC09000865.hg.1	C9orf66	chromosome 9 open reading frame 66	157983	0.383559	0.0165217
	TC6_apd_hap1000102.hg.1	HLA-DQB2	major histocompatibility complex, class II, DQ beta 2	3120	0.38297	0.0117581
	TC21000039.hg.1	USP25	ubiquitin specific peptidase 25	29761	0.382827	0.00814088
	TC05000636.hg.1	C5orf56	chromosome 5 open reading frame 56	441108	0.381458	0.00580459
	TC19000544.hg.1	ZFP36	ZFP36 ring finger protein	7538	0.381117	0.00411492
	TC22000304.hg.1	GTPBP1	GTP binding protein 1	9567	0.380581	3.83e-05
	TC03000512.hg.1	TFG	TRK-fused gene	10342	0.380174	0.00144523
	TC02001007.hg.1	SSB	Sjogren syndrome antigen B (autoantigen La)	6741	0.379381	0.0119424
	TC17002037.hg.1	MPDU1	mannose-P-dolichol utilization defect 1	9526	0.378426	0.0052315
	TC14000319.hg.1	SAMD4A	sterile alpha motif domain containing 4A	23034	0.37806	1.43e-05
	TC06001762.hg.1	NFKBIE	nuclear factor of kappa light polypeptide gene enhancer in B-cells inhibitor, epsilon	4794	0.377657	0.000102923
	TC05001363.hg.1	PPAP2A	phosphatidic acid phosphatase type 2A	8611	0.377455	0.0255101
	TC22000169.hg.1	ASPHD2	aspartate beta-hydroxylase domain containing 2	57168	0.377349	2.83e-07
	TC22001425.hg.1	APOBEC3B	apolipoprotein B mRNA editing enzyme, catalytic polypeptide-like 3B	9582	0.377311	0.00121469
	TC03000466.hg.1	C3orf38	chromosome 3 open reading frame 38	285237	0.377219	0.0015846
	TC05000727.hg.1	SLC35A4	solute carrier family 35, member A4	113829	0.377187	0.00491281
	TC06001915.hg.1	CEP162	centrosomal protein 162kDa	22832	0.376672	0.0153569
	TC03000326.hg.1	PARP3	poly (ADP-ribose) polymerase family, member 3	10039	0.376618	5.5e-06
	TC08001464.hg.1	STK3	serine/threonine kinase 3	6788	0.376582	0.000519049
	TC01002955.hg.1	PSMA5	proteasome (prosome, macropain) subunit, alpha type, 5	5686	0.375777	0.00489021
	TC12000854.hg.1	ANKRD13A	ankyrin repeat domain 13A	88455	0.37519	6.7e-05
	TC01003197.hg.1	MTMR11	myotubularin related protein 11	10903	0.375025	0.000811302
	TC03000573.hg.1	SLC35A5	solute carrier family 35, member A5	55032	0.374964	0.0185603
	TC17001858.hg.1	CD300C	CD300c molecule	10871	0.374131	0.0200076
	TC20000553.hg.1	SIRPD	signal-regulatory protein delta	128646	0.37309	0.0479008
	TC09001403.hg.1	TRIM14	tripartite motif containing 14	9830	0.371541	0.00103533
	TC03001380.hg.1	SHISA5	shisa family member 5	51246	0.37142	7.9e-06
	TC03000461.hg.1	CHMP2B	charged multivesicular body protein 2B	25978	0.37071	0.0080934
	TC03001540.hg.1	FRMD4B	FERM domain containing 4B	23150	0.370334	0.000303764
	TC22001499.hg.1	SCO2	SCO2 cytochrome c oxidase assembly protein	9997	0.370316	0.00160873
	TC22000845.hg.1	NFAM1	NFAT activating protein with ITAM motif 1	150372	0.369845	0.0315648
	TC02001993.hg.1	MOB1A	MOB kinase activator 1A	55233	0.369758	0.000600459
	TC11002151.hg.1	PRCP	prolylcarboxypeptidase (angiotensinase C)	5547	0.368285	0.0148101
	TC12000499.hg.1	IKZF4	IKAROS family zinc finger 4 (Eos)	64375	0.36737	8.33e-06
	TC05002950.hg.1	PRLR	prolactin receptor	5618	0.366552	0.00125845
	TC09001478.hg.1	LPAR1	lysophosphatidic acid receptor 1	1902	0.366366	0.029229
	TC12001612.hg.1	PTGES3	prostaglandin E synthase 3 (cytosolic)	10728	0.366281	0.00111634
	TC06003719.hg.1	COX7A2	cytochrome c oxidase subunit VIIa polypeptide 2 (liver)	1347	0.365532	0.00300841
	TC07000786.hg.1	ATP6V1F	ATPase, H+ transporting, lysosomal 14kDa, V1 subunit F	9296	0.363766	0.0418327
	TC01001111.hg.1	PDIA3P1	protein disulfide isomerase family A, member 3 pseudogene 1	171423	0.363468	0.0161363
	TC21000148.hg.1	CBR1	carbonyl reductase 1	873	0.361455	1.25e-06
	TC14000491.hg.1	AHSA1	AHA1, activator of heat shock 90kDa protein ATPase homolog 1 (yeast)	10598	0.360829	0.0148966
	TC01006289.hg.1	SFT2D2	SFT2 domain containing 2	375035	0.360094	0.0121439
	TC18000014.hg.1	EMILIN2	elastin microfibril interfacer 2	84034	0.358982	0.00865705
	TC17000525.hg.1	ATP6V0A1	ATPase, H+ transporting, lysosomal V0 subunit a1	535	0.358817	0.00389661
	TC06000844.hg.1	PRDM1	PR domain containing 1, with ZNF domain	639	0.358349	0.00334952
	TC06000879.hg.1	FIG4	FIG4 phosphoinositide 5-phosphatase	9896	0.358083	0.00883237
	TC01003196.hg.1	SF3B4	splicing factor 3b, subunit 4, 49kDa	10262	0.35763	0.00626181
	TC19000232.hg.1	CALR	calreticulin	811	0.357156	0.0412416
	TC09002916.hg.1	FKBP15	FK506 binding protein 15, 133kDa	23307	0.357123	0.0063873
	TC06001588.hg.1	BAK1	BCL2-antagonist/killer 1	578	0.356306	2.45e-06
	TC20000992.hg.1	CTSZ	cathepsin Z	1522	0.356177	0.000509491
	TC07001207.hg.1	CYCS	cytochrome c, somatic	54205	0.35614	0.0400963
	TC01003014.hg.1	NRAS	neuroblastoma RAS viral (v-ras) oncogene homolog	4893	0.354524	0.0255332
	TC17002030.hg.1	RNASEK	ribonuclease, RNase K	440400	0.354456	0.00677894
	TC01000898.hg.1	HIAT1	hippocampus abundant transcript 1	64645	0.354263	0.00476311
	TC20000403.hg.1	PTPN1	protein tyrosine phosphatase, non-receptor type 1	5770	0.353648	9.47e-07
	TC08000063.hg.1	ERI1	exoribonuclease 1	90459	0.353518	1.16e-06
	TC08001556.hg.1	ENPP2	ectonucleotide pyrophosphatase/phosphodiesterase 2	5168	0.353249	0.0045998
	TC18000097.hg.1	RBBP8	retinoblastoma binding protein 8	5932	0.353245	0.00827681
	TC02001761.hg.1	SOS1	son of sevenless homolog 1 (Drosophila)	6654	0.352602	0.00296833
	TC18000556.hg.1	KDSR	3-ketodihydrosphingosine reductase	2531	0.352309	0.0445755
	TC05001628.hg.1	CHD1	chromodomain helicase DNA binding protein 1	1105	0.351757	0.0324023
	TC06001102.hg.1	C6orf211	chromosome 6 open reading frame 211	79624	0.351723	0.00365445
	TC16000160.hg.1	RMI2	RecQ mediated genome instability 2	116028	0.351722	0.000538509
	TC14000417.hg.1	KIAA0247	KIAA0247	9766	0.350671	0.00318291
	TC16001296.hg.1	CMC2	C-x(9)-C motif containing 2	56942	0.350475	0.00275951
	TC01003796.hg.1	SLC30A1	solute carrier family 30 (zinc transporter), member 1	7779	0.349988	0.0294423
	TC05000148.hg.1	TARS	threonyl-tRNA synthetase	6897	0.349776	0.0256452
	TC20000762.hg.1	PLAGL2	pleiomorphic adenoma gene-like 2	5326	0.349684	0.00524038
	TC01003607.hg.1	RNASEL	ribonuclease L (2',5'-oligoisoadenylate synthetase-dependent)	6041	0.349618	0.0432118
	TC11003442.hg.1	TRIM34	tripartite motif containing 34	53840	0.348611	0.00401189
	TC19000317.hg.1	RAB8A	RAB8A, member RAS oncogene family	4218	0.348091	0.00180576
	TC6_dbb_hap3000060.hg.1	AIF1	allograft inflammatory factor 1	199	0.34601	0.0129142
	TC09001542.hg.1	C5	complement component 5	727	0.344628	0.00199336
	TC10000294.hg.1	FAM21C	family with sequence similarity 21, member C	253725	0.344484	0.00220402
	TC11002390.hg.1	HSPA8	heat shock 70kDa protein 8	3312	0.344379	0.0311659
	TC04001132.hg.1	SMIM14	small integral membrane protein 14	201895	0.344319	0.00480645
	TC05001689.hg.1	FEM1C	fem-1 homolog c (C. elegans)	56929	0.343892	0.0139459
	TC11001230.hg.1	IFITM3	interferon induced transmembrane protein 3	10410	0.343707	0.00753387
	TC11000304.hg.1	RCN1	reticulocalbin 1, EF-hand calcium binding domain	5954	0.342792	0.000113576
	TC17002733.hg.1	LOC653653	adaptor-related protein complex 1, sigma 2 subunit pseudogene	653653	0.342604	0.0186515
	TC0X002316.hg.1	HNRNPH2	heterogeneous nuclear ribonucleoprotein H2 (H')	3188	0.342255	0.00631994
	TC17000611.hg.1	KPNB1	karyopherin (importin) beta 1	3837	0.342084	0.00205083
	TC01001214.hg.1	SNX27	sorting nexin family member 27	81609	0.341877	0.00654618
	TC11000824.hg.1	ACER3	alkaline ceramidase 3	55331	0.341874	0.0313904
	TC02002726.hg.1	IDH1	isocitrate dehydrogenase 1 (NADP+), soluble	3417	0.341008	0.00168362
	TC19001842.hg.1	LILRB2	leukocyte immunoglobulin-like receptor, subfamily B (with TM and ITIM domains), member 2	10288	0.339924	0.0115499
	TC01002498.hg.1	PSMB2	proteasome (prosome, macropain) subunit, beta type, 2	5690	0.339608	0.00441863
	TC02005030.hg.1	ASPRV1	aspartic peptidase, retroviral-like 1	151516	0.339492	0.0072618
	TC10000310.hg.1	FAM21A	family with sequence similarity 21, member A	387680	0.33893	0.00248126
	TC03000610.hg.1	ADPRH	ADP-ribosylarginine hydrolase	141	0.33767	0.000186429
	TC22000829.hg.1	DESI1	desumoylating isopeptidase 1	27351	0.337563	0.000318354
	TC11000647.hg.1	DRAP1	DR1-associated protein 1 (negative cofactor 2 alpha)	10589	0.337214	0.000565913
	TC15002776.hg.1	PKM	pyruvate kinase, muscle	5315	0.336896	0.0129588
	TC19000997.hg.1	SBNO2	strawberry notch homolog 2 (Drosophila)	22904	0.336814	0.000339272
	TC01000955.hg.1	CSF1	colony stimulating factor 1 (macrophage)	1435	0.336483	0.00205762
	TC01002818.hg.1	GNG5	guanine nucleotide binding protein (G protein), gamma 5	2787	0.334721	0.000828404
	TC22001467.hg.1	APOBEC3F	apolipoprotein B mRNA editing enzyme, catalytic polypeptide-like 3F	200316	0.333691	0.000230267
	TC01001204.hg.1	PIP5K1A	phosphatidylinositol-4-phosphate 5-kinase, type I, alpha	8394	0.333508	0.00785255
	TC16001190.hg.1	ATP6V0D1	ATPase, H+ transporting, lysosomal 38kDa, V0 subunit d1	9114	0.333421	0.00766409
	TC17000634.hg.1	UBE2Z	ubiquitin-conjugating enzyme E2Z	65264	0.332395	1.45e-05
	TC19001746.hg.1	NAPSA	napsin A aspartic peptidase	9476	0.331091	0.00533325
	TC03000709.hg.1	NUDT16P1	nudix (nucleoside diphosphate linked moiety X)-type motif 16 pseudogene 1	152195	0.329534	0.00315315
	TC13000111.hg.1	BRCA2	breast cancer 2, early onset	675	0.328809	0.00503241
	TC04001731.hg.1	HSP90AA6P	heat shock protein 90kDa alpha (cytosolic), class A member 6, pseudogene	441051	0.328063	0.0326434
	TC09001473.hg.1	TXN	thioredoxin	7295	0.326751	0.010787
	TC03001273.hg.1	GLB1	galactosidase, beta 1	2720	0.326084	0.0111495
	TC03000056.hg.1	IRAK2	interleukin-1 receptor-associated kinase 2	3656	0.325336	0.000674132
	TC15000691.hg.1	C15orf39	chromosome 15 open reading frame 39	56905	0.325326	0.017029
	TC09001691.hg.1	SLC2A6	solute carrier family 2 (facilitated glucose transporter), member 6	11182	0.325204	1.54e-05
	TC0X001522.hg.1	HCFC1	host cell factor C1	3054	0.324965	0.00669081
	TC19002694.hg.1	IGFLR1	IGF-like family receptor 1	79713	0.324098	0.00318291
	TC12000856.hg.1	ATP2A2	ATPase, Ca++ transporting, cardiac muscle, slow twitch 2	488	0.324063	0.0170382
	TC01000205.hg.1	SZRD1	SUZ RNA binding domain containing 1	26099	0.323877	0.00014457
	TC02001807.hg.1	SRBD1	S1 RNA binding domain 1	55133	0.323875	0.0099868
	TC16001357.hg.1	FANCA	Fanconi anemia, complementation group A	2175	0.322998	0.000826198
	TC21000202.hg.1	SLC37A1	solute carrier family 37 (glucose-6-phosphate transporter), member 1	54020	0.322799	8.47e-09
	TC13000356.hg.1	TM9SF2	transmembrane 9 superfamily member 2	9375	0.322706	0.0378396
	TC02001171.hg.1	NDUFB3	NADH dehydrogenase (ubiquinone) 1 beta subcomplex, 3, 12kDa	4709	0.322651	0.000536782
	TC12000868.hg.1	SH2B3	SH2B adaptor protein 3	10019	0.322261	0.00854236
	TC01001572.hg.1	CACNA1E	calcium channel, voltage-dependent, R type, alpha 1E subunit	777	0.322163	0.0182554
	TC13000642.hg.1	LCP1	lymphocyte cytosolic protein 1 (L-plastin)	3936	0.322098	0.000378838
	TC09001423.hg.1	GRIN3A	glutamate receptor, ionotropic, N-methyl-D-aspartate 3A	116443	0.32205	2.25e-05
	TC16002087.hg.1	CTRL	chymotrypsin-like	1506	0.32149	0.0153569
	TC01002171.hg.1	RERE	arginine-glutamic acid dipeptide (RE) repeats	473	0.320907	2.31e-07
	TC02001985.hg.1	NAT8	N-acetyltransferase 8 (GCN5-related, putative)	9027	0.320767	0.00249159
	TC14001466.hg.1	SERPINA1	serpin peptidase inhibitor, clade A (alpha-1 antiproteinase, antitrypsin), member 1	5265	0.320615	0.0480913
	TC11001540.hg.1	CD59	CD59 molecule, complement regulatory protein	966	0.320555	0.000180943
	TC08001739.hg.1	PARP10	poly (ADP-ribose) polymerase family, member 10	84875	0.32039	0.000750542
	TC06001929.hg.1	AKIRIN2	akirin 2	55122	0.320085	0.00568526
	TC10000836.hg.1	FAM160B1	family with sequence similarity 160, member B1	57700	0.319923	0.0274489
	TC19001922.hg.1	CHMP2A	charged multivesicular body protein 2A	27243	0.319752	0.000538509
	TC10001498.hg.1	ACTA2	actin, alpha 2, smooth muscle, aorta	59	0.31962	0.000461972
	TC01000127.hg.1	KIF1B	kinesin family member 1B	23095	0.319063	0.0238968
	TC10000135.hg.1	MRC1	mannose receptor, C type 1	4360	0.318841	0.0167622
	TC09000509.hg.1	STX17	syntaxin 17	55014	0.318155	0.00406991
	TC07000870.hg.1	TTC26	tetratricopeptide repeat domain 26	79989	0.318087	0.0175659
	TC01003356.hg.1	ARHGEF11	Rho guanine nucleotide exchange factor (GEF) 11	9826	0.318038	0.000495854
	TC19000479.hg.1	COX6B1	cytochrome c oxidase subunit VIb polypeptide 1 (ubiquitous)	1340	0.317969	0.00265905
	TC01001367.hg.1	NCSTN	nicastrin	23385	0.317753	0.00404704
	TC09001654.hg.1	TOR1A	torsin family 1, member A (torsin A)	1861	0.317749	0.0243699
	TC02000284.hg.1	RHOQ	ras homolog family member Q	23433	0.317108	0.0170457
	TC19000751.hg.1	ATF5	activating transcription factor 5	22809	0.316286	1.2e-05
	TC02000760.hg.1	RALB	v-ral simian leukemia viral oncogene homolog B	5899	0.316108	0.002433
	TC10000721.hg.1	SCD	stearoyl-CoA desaturase (delta-9-desaturase)	6319	0.316061	0.0373219
	TC0X000425.hg.1	PGK1.00	phosphoglycerate kinase 1	5230	0.315976	0.0280343
	TC08000207.hg.1	PTK2B	protein tyrosine kinase 2 beta	2185	0.31521	0.00507151
	TC22000092.hg.1	UBE2L3	ubiquitin-conjugating enzyme E2L 3	7332	0.314398	0.00201689
	TC12003280.hg.1	STAC3	SH3 and cysteine rich domain 3	246329	0.314349	0.000919431
	TC19001072.hg.1	PLIN3	perilipin 3	10226	0.314258	0.00352652
	TC06002270.hg.1	TAGAP	T-cell activation RhoGTPase activating protein	117289	0.313653	0.0145763
	TC04000686.hg.1	RAB33B	RAB33B, member RAS oncogene family	83452	0.313651	0.00100858
	TC11001999.hg.1	UNC93B1	unc-93 homolog B1 (C. elegans)	81622	0.313561	0.0373219
	TC03001435.hg.1	CISH	cytokine inducible SH2-containing protein	1154	0.313391	0.00841737
	TC14002197.hg.1	HIF1A	hypoxia inducible factor 1, alpha subunit (basic helix-loop-helix transcription factor)	3091	0.313011	0.0222115
	TC19002614.hg.1	LILRB3	leukocyte immunoglobulin-like receptor, subfamily B (with TM and ITIM domains), member 3	11025	0.312336	0.0252043
	TC01003868.hg.1	AIDA	axin interactor, dorsalization associated	64853	0.311641	0.0328914
	TC02000146.hg.1	RAB10	RAB10, member RAS oncogene family	10890	0.311632	0.0169139
	TC08000980.hg.1	CTSB	cathepsin B	1508	0.311297	0.00552575
	TC05000702.hg.1	CTNNA1	catenin (cadherin-associated protein), alpha 1, 102kDa	1495	0.310719	0.0148929
	TC03002008.hg.1	NCEH1	neutral cholesterol ester hydrolase 1	57552	0.310658	0.020016
	TC12000775.hg.1	SCYL2	SCY1-like 2 (S. cerevisiae)	55681	0.310641	0.0368463
	TC11001066.hg.1	ARCN1	archain 1	372	0.310491	0.0467847
	TC03000809.hg.1	RNF13	ring finger protein 13	11342	0.310067	0.0285319
	TC0X000536.hg.1	NXT2	nuclear transport factor 2-like export factor 2	55916	0.308864	0.0164188
	TC07001540.hg.1	YWHAG	tyrosine 3-monooxygenase/tryptophan 5-monooxygenase activation protein, gamma	7532	0.308338	0.0173768
	TC17000315.hg.1	NLK	nemo-like kinase	51701	0.308188	0.00449012
	TC0X001031.hg.1	FOXP3	forkhead box P3	50943	0.30784	0.0176339
	TC07000641.hg.1	TRIM56	tripartite motif containing 56	81844	0.307646	4.73e-06
	TC01001934.hg.1	COA6	cytochrome c oxidase assembly factor 6 homolog (S. cerevisiae)	388753	0.307502	0.00520337
	TC19001281.hg.1	IL12RB1	interleukin 12 receptor, beta 1	3594	0.306681	0.00618375
	TC11000755.hg.1	FOLR2	folate receptor 2 (fetal)	2350	0.306406	0.0198522
	TC10001006.hg.1	IL15RA	interleukin 15 receptor, alpha	3601	0.305833	0.000209278
	TC03001521.hg.1	THOC7	THO complex 7 homolog (Drosophila)	80145	0.305747	0.00719077
	TC10000757.hg.1	TMEM180	transmembrane protein 180	79847	0.305669	1.46e-06
	TC11001733.hg.1	ACP2	acid phosphatase 2, lysosomal	53	0.305333	0.000213637
	TC13000875.hg.1	RAB20	RAB20, member RAS oncogene family	55647	0.304351	0.00799851
	TC05002052.hg.1	KCNMB1	potassium large conductance calcium-activated channel, subfamily M, beta member 1	3779	0.304231	0.0102895
	TC12000264.hg.1	ARNTL2	aryl hydrocarbon receptor nuclear translocator-like 2	56938	0.30369	7.86e-07
	TC09001608.hg.1	SH2D3C	SH2 domain containing 3C	10044	0.303004	0.000759273
	TC12001135.hg.1	TNFRSF1A	tumor necrosis factor receptor superfamily, member 1A	7132	0.301813	0.0069248
	TC19001280.hg.1	JAK3	Janus kinase 3	3718	0.30175	0.000751561
	TC01002611.hg.1	PRDX1	peroxiredoxin 1	5052	0.30174	0.0132343
	TC07001551.hg.1	TMEM60	transmembrane protein 60	85025	0.30071	0.00485778
	TC01002035.hg.1	OR2T4	olfactory receptor, family 2, subfamily T, member 4	127074	0.29933	0.0417946
	TC07000036.hg.1	TTYH3	tweety family member 3	80727	0.298545	0.0142003
	TC11002168.hg.1	OR7E2P	olfactory receptor, family 7, subfamily E, member 2 pseudogene	8587	0.298086	0.034732
	TC06000961.hg.1	NCOA7	nuclear receptor coactivator 7	135112	0.298066	0.00288313
	TC03000417.hg.1	ARL6IP5	ADP-ribosylation factor-like 6 interacting protein 5	10550	0.298008	0.0441625
	TC6_mann_hap4000215.hg.1	MICA	MHC class I polypeptide-related sequence A	100507436	0.297373	0.000591311
	TC02000221.hg.1	RASGRP3	RAS guanyl releasing protein 3 (calcium and DAG-regulated)	25780	0.297233	0.0218548
	TC12000078.hg.1	LTBR	lymphotoxin beta receptor (TNFR superfamily, member 3)	4055	0.295587	0.00159261
	TC13000566.hg.1	SPG20	spastic paraplegia 20 (Troyer syndrome)	23111	0.294956	0.0111863
	TC0X000222.hg.1	RP2	retinitis pigmentosa 2 (X-linked recessive)	6102	0.294823	0.0211395
	TC02005004.hg.1	HSPE1	heat shock 10kDa protein 1	3336	0.294554	0.00708727
	TC22001427.hg.1	APOBEC3D	apolipoprotein B mRNA editing enzyme, catalytic polypeptide-like 3D	140564	0.294538	0.0187381
	TC17002434.hg.1	YWHAE	tyrosine 3-monooxygenase/tryptophan 5-monooxygenase activation protein, epsilon	7531	0.294271	0.0256713
	TC06001903.hg.1	FAM46A	family with sequence similarity 46, member A	55603	0.294261	0.002229
	TC03000348.hg.1	PRKCD	protein kinase C, delta	5580	0.294157	0.012356
	TC03001345.hg.1	CDCP1	CUB domain containing protein 1	64866	0.293606	0.000367111
	TC16000548.hg.1	NUTF2	nuclear transport factor 2	10204	0.293373	0.00400264
	TC18000213.hg.1	PMAIP1	phorbol-12-myristate-13-acetate-induced protein 1	5366	0.292881	0.00695799
	TC15000827.hg.1	AKAP13	A kinase (PRKA) anchor protein 13	11214	0.292848	0.00743812
	TC22000873.hg.1	KIAA0930	KIAA0930	23313	0.292597	0.00606847
	TC02002648.hg.1	HSPD1	heat shock 60kDa protein 1 (chaperonin)	3329	0.291895	0.0324023
	TC11002363.hg.1	DPAGT1	dolichyl-phosphate (UDP-N-acetylglucosamine) N-acetylglucosaminephosphotransferase 1 (GlcNAc-1-P transferase)	1798	0.290742	0.00605847
	TC14001028.hg.1	SNX6	sorting nexin 6	58533	0.289855	0.0237859
	TC08001152.hg.1	RNF5P1	ring finger protein 5, E3 ubiquitin protein ligase pseudogene 1	286140	0.289132	0.0187943
	TC10001097.hg.1	DNAJC1	DnaJ (Hsp40) homolog, subfamily C, member 1	64215	0.288654	0.0303518
	TC16001578.hg.1	MT1IP	metallothionein 1I, pseudogene	644314	0.288606	0.0259195
	TC04001609.hg.1	OTUD4	OTU deubiquitinase 4	54726	0.288243	0.0362391
	TC14000622.hg.1	CCNK	cyclin K	8812	0.287837	0.00592
	TC11003441.hg.1	TRIM6	tripartite motif containing 6	117854	0.286623	0.00233032
	TC02000407.hg.1	ANXA4	annexin A4	307	0.286575	0.0117128
	TC17000068.hg.1	LOC339166	uncharacterized LOC339166	339166	0.286159	0.0387969
	TC14001088.hg.1	RPL10L	ribosomal protein L10-like	140801	0.285867	0.0368904
	TC01002843.hg.1	GTF2B	general transcription factor IIB	2959	0.285704	0.0105243
	TC16001157.hg.1	SLC38A7	solute carrier family 38, member 7	55238	0.285472	0.000242405
	TC08000547.hg.1	DECR1	2,4-dienoyl CoA reductase 1, mitochondrial	1666	0.284951	0.044017
	TC16000837.hg.1	GLYR1	glyoxylate reductase 1 homolog (Arabidopsis)	84656	0.283972	0.0431333
	TC01001557.hg.1	TOR1AIP1	torsin A interacting protein 1	26092	0.283451	0.0256687
	TC03000677.hg.1	RAB7A	RAB7A, member RAS oncogene family	7879	0.283311	0.0230645
	TC12001214.hg.1	CLEC1A	C-type lectin domain family 1, member A	51267	0.283068	0.0260651
	TC21000302.hg.1	C21orf91	chromosome 21 open reading frame 91	54149	0.282982	0.000948177
	TC19000256.hg.1	CD97	CD97 molecule	976	0.282335	0.0241525
	TC14000322.hg.1	MAPK1IP1L	mitogen-activated protein kinase 1 interacting protein 1-like	93487	0.28219	0.0359308
	TC16000753.hg.1	CLCN7	chloride channel, voltage-sensitive 7	1186	0.281894	0.000284188
	TC20001741.hg.1	FKBP1A	FK506 binding protein 1A, 12kDa	2280	0.28107	0.0159458
	TC19000578.hg.1	CCDC97	coiled-coil domain containing 97	90324	0.280976	0.00561881
	TC08000275.hg.1	ZNF703	zinc finger protein 703	80139	0.280697	0.00435518
	TC12000081.hg.1	TAPBPL	TAP binding protein-like	55080	0.280033	0.0179157
	TC05000823.hg.1	PPARGC1B	peroxisome proliferator-activated receptor gamma, coactivator 1 beta	133522	0.279786	0.000745989
	TC20000498.hg.1	OGFR	opioid growth factor receptor	11054	0.279354	0.000204395
	TC02005010.hg.1	SP140L	SP140 nuclear body protein-like	93349	0.279202	0.0208784
	TC01002444.hg.1	SDC3	syndecan 3	9672	0.278993	0.00221481
	TC16000640.hg.1	CMIP	c-Maf inducing protein	80790	0.278751	0.0118535
	TC08000641.hg.1	ATP6V1C1	ATPase, H+ transporting, lysosomal 42kDa, V1 subunit C1	528	0.278568	0.0490704
	TC19000135.hg.1	TRAPPC5	trafficking protein particle complex 5	126003	0.278525	0.0292642
	TC02005053.hg.1	NHEJ1	nonhomologous end-joining factor 1	79840	0.278182	0.020791
	TC01003847.hg.1	DUSP10	dual specificity phosphatase 10	11221	0.278108	0.0234143
	TC11003170.hg.1	SLC15A3	solute carrier family 15 (oligopeptide transporter), member 3	51296	0.277585	0.046141
	TC13000161.hg.1	LACC1	laccase (multicopper oxidoreductase) domain containing 1	144811	0.27752	0.0059339
	TC06001313.hg.1	MBOAT1	membrane bound O-acyltransferase domain containing 1	154141	0.277291	0.0320648
	TC08001218.hg.1	LYPLA1	lysophospholipase I	10434	0.277052	0.0285319
	TC08001717.hg.1	ZC3H3	zinc finger CCCH-type containing 3	23144	0.276528	0.000167181
	TC19001553.hg.1	TGFB1	transforming growth factor, beta 1	7040	0.276473	0.0191249
	TC01003896.hg.1	SDE2	SDE2 telomere maintenance homolog (S. pombe)	163859	0.276461	0.0270893
	TC18000167.hg.1	C18orf25	chromosome 18 open reading frame 25	147339	0.275255	0.0188117
	TC09001001.hg.1	NDUFB6	NADH dehydrogenase (ubiquinone) 1 beta subcomplex, 6, 17kDa	4712	0.27448	0.0494639
	TC01006315.hg.1	SEPN1	selenoprotein N, 1	57190	0.27392	0.0282517
	TC20000191.hg.1	HM13	histocompatibility (minor) 13	81502	0.272692	0.000654816
	TC14001605.hg.1	DCAF11	DDB1 and CUL4 associated factor 11	80344	0.272318	0.0111279
	TC03001418.hg.1	UBA7	ubiquitin-like modifier activating enzyme 7	7318	0.272003	0.00497587
	TC12002269.hg.1	SKP1P2	S-phase kinase-associated protein 1 pseudogene 2	728622	0.271696	0.0341539
	TC21000288.hg.1	NRIP1	nuclear receptor interacting protein 1	8204	0.270994	0.0215925
	TC11001939.hg.1	RELA	v-rel avian reticuloendotheliosis viral oncogene homolog A	5970	0.270902	0.0479376
	TC11000010.hg.1	IFITM2	interferon induced transmembrane protein 2	10581	0.27064	0.00575507
	TC12003205.hg.1	NDUFA9	NADH dehydrogenase (ubiquinone) 1 alpha subcomplex, 9, 39kDa	4704	0.270107	0.0167403
	TC14000786.hg.1	TRAF3	TNF receptor-associated factor 3	7187	0.270095	0.00630527
	TC15002764.hg.1	PLEKHO2	pleckstrin homology domain containing, family O member 2	80301	0.269403	0.0195708
	TC17000897.hg.1	SYNGR2	synaptogyrin 2	9144	0.269367	0.0163309
	TC12001552.hg.1	ATF7	activating transcription factor 7	11016	0.269289	3.54e-05
	TC07001249.hg.1	NOD1	nucleotide-binding oligomerization domain containing 1	10392	0.269055	0.000158011
	TC11003035.hg.1	GVINP1	GTPase, very large interferon inducible pseudogene 1	387751	0.268629	0.0211693
	TC05000072.hg.1	CCT5	chaperonin containing TCP1, subunit 5 (epsilon)	22948	0.268269	0.0248098
	TC05001553.hg.1	TMEM167A	transmembrane protein 167A	153339	0.267778	0.0182554
	TC11001835.hg.1	MRPL16	mitochondrial ribosomal protein L16	54948	0.267678	0.00455419
	TC01001263.hg.1	INTS3	integrator complex subunit 3	65123	0.267164	0.00262785
	TC11001235.hg.1	RNH1	ribonuclease/angiogenin inhibitor 1	6050	0.265456	0.0126395
	TC19001831.hg.1	OSCAR	osteoclast associated, immunoglobulin-like receptor	126014	0.26459	0.0214344
	TC19001653.hg.1	PRKD2	protein kinase D2	25865	0.262883	0.0035422
	TC0X000042.hg.1	HCCS	holocytochrome c synthase	3052	0.262853	0.0214194
	TC04000526.hg.1	NFKB1	nuclear factor of kappa light polypeptide gene enhancer in B-cells 1	4790	0.262598	0.0468539
	TC19001546.hg.1	C19orf54	chromosome 19 open reading frame 54	284325	0.26244	0.0149075
	TC10001623.hg.1	ACTR1A	ARP1 actin-related protein 1 homolog A, centractin alpha (yeast)	10121	0.262289	0.0161886
	TC02001730.hg.1	MYADML	myeloid-associated differentiation marker-like (pseudogene)	151325	0.262075	0.0197965
	TC12000891.hg.1	PLBD2	phospholipase B domain containing 2	196463	0.262014	0.006825
	TC03001468.hg.1	DCP1A	decapping mRNA 1A	55802	0.261771	0.0439643
	TC10001286.hg.1	FAM21EP	family with sequence similarity 21, member A pseudogene	100421577	0.261623	0.00677484
	TC14001225.hg.1	MAX	MYC associated factor X	4149	0.2611	0.00366148
	TC0X001121.hg.1	IL2RG	interleukin 2 receptor, gamma	3561	0.260729	0.0438834
	TC06004065.hg.1	HLA-G	major histocompatibility complex, class I, G	3135	0.260728	0.000512439
	TC10001201.hg.1	HNRNPF	heterogeneous nuclear ribonucleoprotein F	3185	0.260393	0.00523866
	TC01000206.hg.1	NECAP2	NECAP endocytosis associated 2	55707	0.26031	0.0111686
	TC06000185.hg.1	BTN2A2	butyrophilin, subfamily 2, member A2	10385	0.259819	0.0363687
	TC06000086.hg.1	HIVEP1	human immunodeficiency virus type I enhancer binding protein 1	3096	0.259565	0.0029683
	TC0X000999.hg.1	ELK1	ELK1, member of ETS oncogene family	2002	0.25943	0.00354879
	TC01003240.hg.1	S100A11	S100 calcium binding protein A11	6282	0.259152	0.0259772
	TC13000099.hg.1	USPL1	ubiquitin specific peptidase like 1	10208	0.25873	0.0413282
	TC06001148.hg.1	MRPL18	mitochondrial ribosomal protein L18	29074	0.258395	0.0240856
	TC16000634.hg.1	CENPN	centromere protein N	55839	0.258215	0.00182272
	TC15000858.hg.1	SEMA4B	sema domain, immunoglobulin domain (Ig), transmembrane domain (TM) and short cytoplasmic domain, (semaphorin) 4B	10509	0.258009	0.000829542
	TC6_mcf_hap5000114.hg.1	TRIM26	tripartite motif containing 26	7726	0.257217	0.0024327
	TC10001641.hg.1	ITPRIP	inositol 1,4,5-trisphosphate receptor interacting protein	85450	0.256074	0.0258456
	TC12001608.hg.1	BAZ2A	bromodomain adjacent to zinc finger domain, 2A	11176	0.255885	0.00164145
	TC19002607.hg.1	IL4I1	interleukin 4 induced 1	259307	0.255635	0.000112568
	TC11000138.hg.1	OR10A5	olfactory receptor, family 10, subfamily A, member 5	144124	0.255121	0.0487596
	TC07000942.hg.1	FAM115C	family with sequence similarity 115, member C	285966	0.254859	3.5e-05
	TC12000367.hg.1	TUBA1C	tubulin, alpha 1c	84790	0.253885	0.000196065
	TC02002349.hg.1	WTH3DI	RAB6C-like	150786	0.253798	0.0252055
	TC0X000278.hg.1	CLCN5	chloride channel, voltage-sensitive 5	1184	0.253696	0.0168738
	TC04000774.hg.1	KIAA0922	KIAA0922	23240	0.253587	0.0340063
	TC22000337.hg.1	ACO2	aconitase 2, mitochondrial	50	0.253225	0.0357136
	TC19002633.hg.1	RAB4B	RAB4B, member RAS oncogene family	53916	0.252791	0.000380249
	TC22000223.hg.1	RNF185	ring finger protein 185	91445	0.25269	0.00367973
	TC05001529.hg.1	LOC644936	actin, beta pseudogene	644936	0.251557	0.0177389
	TC02004385.hg.1	CHMP3	charged multivesicular body protein 3	51652	0.24999	0.0121723
	TC09000319.hg.1	TJP2	tight junction protein 2	9414	0.248781	0.0156512
	TC0X001446.hg.1	SLITRK4	SLIT and NTRK-like family, member 4	139065	0.24815	0.0136964
	TC19001104.hg.1	GPR108	G protein-coupled receptor 108	56927	0.247702	0.0229499
	TC01000968.hg.1	CD53	CD53 molecule	963	0.247542	0.0109984
	TC02005045.hg.1	NFE2L2	nuclear factor, erythroid 2-like 2	4780	0.246583	0.00336156
	TC11000703.hg.1	NDUFS8	NADH dehydrogenase (ubiquinone) Fe-S protein 8, 23kDa (NADH-coenzyme Q reductase)	4728	0.246476	0.0471609
	TC11001007.hg.1	SDHD	succinate dehydrogenase complex, subunit D, integral membrane protein	6392	0.246234	0.00803834
	TC21001059.hg.1	IL10RB	interleukin 10 receptor, beta	3588	0.246232	0.00302856
	TC07001972.hg.1	LOC154761	family with sequence similarity 115, member C pseudogene	154761	0.246115	0.0025773
	TC07000453.hg.1	LAT2	linker for activation of T cells family, member 2	7462	0.246071	0.0287692
	TC07000998.hg.1	LRRC61	leucine rich repeat containing 61	65999	0.245529	0.000327446
	TC01003225.hg.1	RFX5	regulatory factor X, 5 (influences HLA class II expression)	5993	0.2455	0.000491598
	TC01000574.hg.1	AKR1A1	aldo-keto reductase family 1, member A1 (aldehyde reductase)	10327	0.244791	0.00103162
	TC05000908.hg.1	MAT2B	methionine adenosyltransferase II, beta	27430	0.244189	0.0297849
	TC03002057.hg.1	KLHL6	kelch-like family member 6	89857	0.243989	0.00417181
	TC09000584.hg.1	ATP6V1G1	ATPase, H+ transporting, lysosomal 13kDa, V1 subunit G1	9550	0.243651	0.000110959
	TC01003413.hg.1	USF1	upstream transcription factor 1	7391	0.243517	0.0164627
	TC11002725.hg.1	CAPN1	calpain 1, (mu/I) large subunit	823	0.243375	0.0154099
	TC6_ssto_hap7000120.hg.1	PPP1R18	protein phosphatase 1, regulatory subunit 18	170954	0.24236	0.0178703
	TC09000891.hg.1	PLGRKT	plasminogen receptor, C-terminal lysine transmembrane protein	55848	0.24196	0.000168493
	TC0X001327.hg.1	C1GALT1C1	C1GALT1-specific chaperone 1	29071	0.241933	0.00333577
	TC19000583.hg.1	CEACAM5	carcinoembryonic antigen-related cell adhesion molecule 5	1048	0.241756	0.00870121
	TC10000419.hg.1	HK1	hexokinase 1	3098	0.241644	0.0238405
	TC06004066.hg.1	HLA-H	major histocompatibility complex, class I, H (pseudogene)	3136	0.24145	0.00706074
	TC16001098.hg.1	N4BP1	NEDD4 binding protein 1	9683	0.241422	0.0430342
	TC07002035.hg.1	SMARCD3	SWI/SNF related, matrix associated, actin dependent regulator of chromatin, subfamily d, member 3	6604	0.241396	0.000194096
	TC20000900.hg.1	ELMO2	engulfment and cell motility 2	63916	0.241306	0.0150512
	TC01000287.hg.1	C1QB	complement component 1, q subcomponent, B chain	713	0.241274	0.0134117
	TC09000350.hg.1	GCNT1	glucosaminyl (N-acetyl) transferase 1, core 2	2650	0.24086	0.00473612
	TC22001468.hg.1	APOBEC3G	apolipoprotein B mRNA editing enzyme, catalytic polypeptide-like 3G	60489	0.239257	0.0452782
	TC20000273.hg.1	SRC	SRC proto-oncogene, non-receptor tyrosine kinase	6714	0.238369	0.00230591
	TC01006383.hg.1	MUC1	mucin 1, cell surface associated	4582	0.238284	0.00482175
	TC11001098.hg.1	OAF	OAF homolog (Drosophila)	220323	0.238265	0.0114667
	TC07003301.hg.1	PNPLA8	patatin-like phospholipase domain containing 8	50640	0.237764	0.0346317
	TC02002922.hg.1	HDAC4	histone deacetylase 4	9759	0.237747	0.000983444
	TC14001453.hg.1	ITPK1	inositol-tetrakisphosphate 1-kinase	3705	0.237501	0.0479114
	TC17000060.hg.1	KIF1C	kinesin family member 1C	10749	0.237277	1.41e-05
	TC10001327.hg.1	EGR2	early growth response 2	1959	0.236104	0.0027006
	TC07003366.hg.1	ATP5J2	ATP synthase, H+ transporting, mitochondrial Fo complex, subunit F2	9551	0.235801	0.0048196
	TC13000634.hg.1	SLC25A30	solute carrier family 25, member 30	253512	0.235552	0.00680512
	TC01000575.hg.1	NASP	nuclear autoantigenic sperm protein (histone-binding)	4678	0.234266	0.0152266
	TC19001071.hg.1	TICAM1	toll-like receptor adaptor molecule 1	148022	0.231703	0.0091771
	TC06001750.hg.1	YIPF3	Yip1 domain family, member 3	25844	0.231528	0.0377036
	TC16000481.hg.1	CETP	cholesteryl ester transfer protein, plasma	1071	0.230941	0.0074011
	TC12003225.hg.1	ARF3	ADP-ribosylation factor 3	377	0.229907	0.00697004
	TC08000824.hg.1	GSDMD	gasdermin D	79792	0.2298	1.87e-05
	TC19000335.hg.1	MVB12A	multivesicular body subunit 12A	93343	0.229018	0.00630527
	TC07001218.hg.1	HOXA1	homeobox A1	3198	0.229015	0.0237048
	TC11002721.hg.1	ARL2-SNX15	ARL2-SNX15 readthrough (NMD candidate)	100528018	0.228538	0.008008
	TC02000302.hg.1	FOXN2	forkhead box N2	3344	0.228352	0.045663
	TC17000868.hg.1	UBALD2	UBA-like domain containing 2	283991	0.22818	0.0196187
	TC17001525.hg.1	RAB5C	RAB5C, member RAS oncogene family	5878	0.228163	0.00485299
	TC03000121.hg.1	UBE2E2	ubiquitin-conjugating enzyme E2E 2	7325	0.227963	0.0273085
	TC12000576.hg.1	TBC1D30	TBC1 domain family, member 30	23329	0.227953	0.00169633
	TC02000451.hg.1	TET3	tet methylcytosine dioxygenase 3	200424	0.227698	0.0025346
	TC22000474.hg.1	ATP6V1E1	ATPase, H+ transporting, lysosomal 31kDa, V1 subunit E1	529	0.226826	0.0327796
	TC20000270.hg.1	TLDC2	TBC/LysM-associated domain containing 2	140711	0.226487	0.00803256
	TC09000788.hg.1	FCN2	ficolin (collagen/fibrinogen domain containing lectin) 2	2220	0.225346	0.0183109
	TC17000616.hg.1	SP2	Sp2 transcription factor	6668	0.225132	0.00251763
	TC19001588.hg.1	ETHE1	ethylmalonic encephalopathy 1	23474	0.224728	0.0147407
	TC19001540.hg.1	SERTAD1	SERTA domain containing 1	29950	0.22215	0.00779518
	TC6_mcf_hap5000203.hg.1	HLA-F	major histocompatibility complex, class I, F	3134	0.222138	0.00204238
	TC14002343.hg.1	NEDD8	neural precursor cell expressed, developmentally down-regulated 8	4738	0.221325	0.0181273
	TC09001223.hg.1	RFK	riboflavin kinase	55312	0.220862	0.0202785
	TC17000088.hg.1	EIF5A	eukaryotic translation initiation factor 5A	1984	0.220841	0.0067165
	TC02002830.hg.1	IRS1	insulin receptor substrate 1	3667	0.220401	0.0221027
	TC19001103.hg.1	C3	complement component 3	718	0.220088	0.00390569
	TC05000855.hg.1	LARP1	La ribonucleoprotein domain family, member 1	23367	0.220053	0.000300331
	TC08001235.hg.1	LINC00968	long intergenic non-protein coding RNA 968	100507632	0.219746	0.00276674
	TC01002149.hg.1	ACOT7	acyl-CoA thioesterase 7	11332	0.218034	0.00551236
	TC12000101.hg.1	PTPN6	protein tyrosine phosphatase, non-receptor type 6	5777	0.217651	0.00478972
	TC11002058.hg.1	CLPB	ClpB caseinolytic peptidase B homolog (E. coli)	81570	0.217428	0.00349557
	TC05001005.hg.1	TSPAN17	tetraspanin 17	26262	0.216624	0.00175197
	TC11000256.hg.1	HTATIP2	HIV-1 Tat interactive protein 2, 30kDa	10553	0.216593	0.00144459
	TC01002286.hg.1	SDHB	succinate dehydrogenase complex, subunit B, iron sulfur (Ip)	6390	0.216527	0.0191641
	TC16001032.hg.1	SEPHS2	selenophosphate synthetase 2	22928	0.216421	0.00819918
	TC14001534.hg.1	CDC42BPB	CDC42 binding protein kinase beta (DMPK-like)	9578	0.216271	0.0135277
	TC14001240.hg.1	TMEM229B	transmembrane protein 229B	161145	0.215493	0.00964971
	TC14000972.hg.1	RABGGTA	Rab geranylgeranyltransferase, alpha subunit	5875	0.2146	0.0389181
	TC11001361.hg.1	TAF10	TAF10 RNA polymerase II, TATA box binding protein (TBP)-associated factor, 30kDa	6881	0.21413	0.0309587
	TC01000374.hg.1	XKR8	XK, Kell blood group complex subunit-related family, member 8	55113	0.213962	0.023707
	TC01000153.hg.1	MIIP	migration and invasion inhibitory protein	60672	0.213186	0.00319036
	TC16001722.hg.1	GAS8	growth arrest-specific 8	2622	0.212575	0.0037927
	TC17000523.hg.1	STAT5A	signal transducer and activator of transcription 5A	6776	0.21086	0.000449852
	TC22000850.hg.1	CYB5R3	cytochrome b5 reductase 3	1727	0.210451	0.022848
	TC03000385.hg.1	C3orf14	chromosome 3 open reading frame 14	57415	0.210441	0.0244411
	TC09000519.hg.1	RNF20	ring finger protein 20, E3 ubiquitin protein ligase	56254	0.210185	0.0362169
	TC06004067.hg.1	HLA-J	major histocompatibility complex, class I, J (pseudogene)	3137	0.209207	0.0175783
	TC11001543.hg.1	LMO2	LIM domain only 2 (rhombotin-like 1)	4005	0.208499	0.00480058
	TC14002300.hg.1	FNTB	farnesyltransferase, CAAX box, beta	2342	0.208324	0.0154012
	TC04001724.hg.1	SH3RF1	SH3 domain containing ring finger 1	57630	0.208173	0.0313602
	TC20000044.hg.1	PANK2	pantothenate kinase 2	80025	0.208144	0.00897856
	TC01001190.hg.1	ADAMTSL4	ADAMTS-like 4	54507	0.208096	0.0412427
	TC19000065.hg.1	GNA15	guanine nucleotide binding protein (G protein), alpha 15 (Gq class)	2769	0.207798	0.0350889
	TC07000584.hg.1	BRI3	brain protein I3	25798	0.207135	0.0175391
	TC19001569.hg.1	GSK3A	glycogen synthase kinase 3 alpha	2931	0.207055	0.0362376
	TC02002039.hg.1	CAPG	capping protein (actin filament), gelsolin-like	822	0.206597	0.0187358
	TC17000549.hg.1	TMEM106A	transmembrane protein 106A	113277	0.206467	0.0282566
	TC12001962.hg.1	GPN3	GPN-loop GTPase 3	51184	0.206439	0.0269268
	TC01000990.hg.1	CAPZA1	capping protein (actin filament) muscle Z-line, alpha 1	829	0.206136	0.0456369
	TC01002191.hg.1	CASZ1	castor zinc finger 1	54897	0.205076	0.00260107
	TC17001731.hg.1	SUPT4H1	suppressor of Ty 4 homolog 1 (S. cerevisiae)	6827	0.204182	0.0268195
	TC01003699.hg.1	ARL8A	ADP-ribosylation factor-like 8A	127829	0.203324	0.0170133
	TC0X000587.hg.1	UBE2A	ubiquitin-conjugating enzyme E2A	7319	0.203009	0.0400457
	TC14001246.hg.1	ZFYVE26	zinc finger, FYVE domain containing 26	23503	0.202967	0.0349848
	TC10001582.hg.1	SLC25A28	solute carrier family 25 (mitochondrial iron transporter), member 28	81894	0.20276	0.0171416
	TC16000811.hg.1	ZNF200	zinc finger protein 200	7752	0.202461	0.00435518
	TC17001095.hg.1	NAA38	N(alpha)-acetyltransferase 38, NatC auxiliary subunit	84316	0.201924	0.0251392
	TC03003417.hg.1	PLSCR2	phospholipid scramblase 2	57047	0.20044	0.0321113
	TC17001877.hg.1	GRB2	growth factor receptor-bound protein 2	2885	0.199494	0.00898101
	TC07003382.hg.1	C7orf49	chromosome 7 open reading frame 49	78996	0.197975	0.00885415
	TC02001855.hg.1	RTN4	reticulon 4	57142	0.197815	0.00579983
	TC17002854.hg.1	GH1	growth hormone 1	2688	0.197672	0.0298251
	TC14000087.hg.1	TOX4	TOX high mobility group box family member 4	9878	0.1976	0.0148828
	TC17000493.hg.1	WIPF2	WAS/WASL interacting protein family, member 2	147179	0.197417	0.00343616
	TC04000501.hg.1	PDLIM5	PDZ and LIM domain 5	10611	0.197381	0.0346414
	TC06004059.hg.1	HLA-C	major histocompatibility complex, class I, C	3107	0.196468	0.0182088
	TC19001665.hg.1	KPTN	kaptin (actin binding protein)	11133	0.195487	0.0260651
	TC01006354.hg.1	MOB3C	MOB kinase activator 3C	148932	0.19533	0.00313734
	TC0X000589.hg.1	NDUFA1	NADH dehydrogenase (ubiquinone) 1 alpha subcomplex, 1, 7.5kDa	4694	0.194739	0.0346414
	TC06001245.hg.1	NRN1	neuritin 1	51299	0.194285	0.0323115
	TC02000735.hg.1	ACTR3	ARP3 actin-related protein 3 homolog (yeast)	10096	0.194261	0.0346925
	TC6_cox_hap2000255.hg.1	CLIC1	chloride intracellular channel 1	1192	0.193698	0.0388179
	TC01000302.hg.1	LYPLA2	lysophospholipase II	11313	0.193694	0.0222115
	TC10001439.hg.1	KCNMA1	potassium large conductance calcium-activated channel, subfamily M, alpha member 1	3778	0.192467	0.0139526
	TC09000415.hg.1	CKS2	CDC28 protein kinase regulatory subunit 2	1164	0.19234	0.0423608
	TC20001009.hg.1	CABLES2	Cdk5 and Abl enzyme substrate 2	81928	0.19206	0.0240084
	TC03002212.hg.1	IL17RC	interleukin 17 receptor C	84818	0.191751	0.0137068
	TC11002244.hg.1	CASP12	caspase 12 (gene/pseudogene)	100506742	0.190635	0.0215925
	TC6_cox_hap2000026.hg.1	HLA-A	major histocompatibility complex, class I, A	3105	0.18883	0.016023
	TC05000165.hg.1	SLC1A3	solute carrier family 1 (glial high affinity glutamate transporter), member 3	6507	0.188822	0.00674288
	TC01003504.hg.1	SCYL3	SCY1-like 3 (S. cerevisiae)	57147	0.187691	0.0420774
	TC17000295.hg.1	DHRS7B	dehydrogenase/reductase (SDR family) member 7B	25979	0.187637	0.0158136
	TC17001849.hg.1	CDC42EP4	CDC42 effector protein (Rho GTPase binding) 4	23580	0.187473	0.0463866
	TC13000876.hg.1	CARS2	cysteinyl-tRNA synthetase 2, mitochondrial (putative)	79587	0.18722	0.0060406
	TC0X000755.hg.1	ABCD1	ATP-binding cassette, sub-family D (ALD), member 1	215	0.187131	0.0196667
	TC0X000641.hg.1	FAM122C	family with sequence similarity 122C	159091	0.186603	0.00378864
	TC11000471.hg.1	ZDHHC5	zinc finger, DHHC-type containing 5	25921	0.185938	0.00555316
	TC01000474.hg.1	ZC3H12A	zinc finger CCCH-type containing 12A	80149	0.185842	0.0101471
	TC19000638.hg.1	RELB	v-rel avian reticuloendotheliosis viral oncogene homolog B	5971	0.185225	0.00533325
	TC17002554.hg.1	TMEM11	transmembrane protein 11	8834	0.18517	0.0274668
	TC12001405.hg.1	PRICKLE1	prickle homolog 1 (Drosophila)	144165	0.184842	0.00708355
	TC03000710.hg.1	NUDT16	nudix (nucleoside diphosphate linked moiety X)-type motif 16	131870	0.184728	0.0432766
	TC16000370.hg.1	BCKDK	branched chain ketoacid dehydrogenase kinase	10295	0.184422	0.0487125
	TC17001734.hg.1	MTMR4	myotubularin related protein 4	9110	0.184204	0.000960937
	TC0X001538.hg.1	G6PD	glucose-6-phosphate dehydrogenase	2539	0.183971	0.025842
	TC06000918.hg.1	DSE	dermatan sulfate epimerase	29940	0.183046	0.0125177
	TC12001605.hg.1	TIMELESS	timeless circadian clock	8914	0.182641	0.00922475
	TC17001307.hg.1	FAM222B	family with sequence similarity 222, member B	55731	0.181378	0.0238405
	TC08002591.hg.1	PPP2R2A	protein phosphatase 2, regulatory subunit B, alpha	5520	0.181099	0.0270478
	TC17000034.hg.1	CTNS	cystinosin, lysosomal cystine transporter	1497	0.180731	0.00533325
	TC6_cox_hap2000036.hg.1	HLA-E	major histocompatibility complex, class I, E	3133	0.18058	0.00316713
	TC6_ssto_hap7000191.hg.1	HLA-B	major histocompatibility complex, class I, B	3106	0.18027	0.0252043
	TC19000129.hg.1	PNPLA6	patatin-like phospholipase domain containing 6	10908	0.180094	0.0178241
	TC19000534.hg.1	NFKBIB	nuclear factor of kappa light polypeptide gene enhancer in B-cells inhibitor, beta	4793	0.179642	0.00833556
	TC07000652.hg.1	SH2B2	SH2B adaptor protein 2	10603	0.179322	0.0431333
	TC06000023.hg.1	RIPK1	receptor (TNFRSF)-interacting serine-threonine kinase 1	8737	0.179314	0.0208317
	TC01006352.hg.1	MYCBP	MYC binding protein	26292	0.178545	0.0126152
	TC17000521.hg.1	NKIRAS2	NFKB inhibitor interacting Ras-like 2	28511	0.178361	0.00404299
	TC01000503.hg.1	MFSD2A	major facilitator superfamily domain containing 2A	84879	0.178252	0.0287965
	TC20000360.hg.1	ZSWIM1	zinc finger, SWIM-type containing 1	90204	0.177812	0.0130516
	TC19000136.hg.1	CLEC4M	C-type lectin domain family 4, member M	10332	0.176752	0.0288263
	TC02001035.hg.1	CDCA7	cell division cycle associated 7	83879	0.176654	0.0483381
	TC11002329.hg.1	SIK3	SIK family kinase 3	23387	0.17609	0.035085
	TC19000168.hg.1	C19orf66	chromosome 19 open reading frame 66	55337	0.175882	0.0265487
	TC01002045.hg.1	ZNF672	zinc finger protein 672	79894	0.175559	0.00307047
	TC02000514.hg.1	RNF181	ring finger protein 181	51255	0.175534	0.00260209
	TC03000543.hg.1	BBX	bobby sox homolog (Drosophila)	56987	0.175289	0.0410097
	TC14002339.hg.1	IPO4	importin 4	79711	0.173124	0.000963108
	TC22000849.hg.1	POLDIP3	polymerase (DNA-directed), delta interacting protein 3	84271	0.171137	0.0443506
	TC13000899.hg.1	GAS6	growth arrest-specific 6	2621	0.170587	0.0468422
	TC22000293.hg.1	MICALL1	MICAL-like 1	85377	0.170252	0.0282566
	TC12001584.hg.1	CD63	CD63 molecule	967	0.16984	0.0212153
	TC16001052.hg.1	PYCARD	PYD and CARD domain containing	29108	0.169142	0.0466264
	TC03000822.hg.1	MED12L	mediator complex subunit 12-like	116931	0.168437	0.01412
	TC15000342.hg.1	B2M	beta-2-microglobulin	567	0.168201	0.0329855
	TC11001938.hg.1	MAP3K11	mitogen-activated protein kinase kinase kinase 11	4296	0.165992	0.0175282
	TC02000592.hg.1	COX5B	cytochrome c oxidase subunit Vb	1329	0.164766	0.025842
	TC11000098.hg.1	OR51E1	olfactory receptor, family 51, subfamily E, member 1	143503	0.163329	0.0400369
	TC19001045.hg.1	MFSD12	major facilitator superfamily domain containing 12	126321	0.161243	0.00736086
	TC10000660.hg.1	HHEX	hematopoietically expressed homeobox	3087	0.160281	0.0442399
	TC11001881.hg.1	STX5	syntaxin 5	6811	0.159421	0.0256687
	TC15000405.hg.1	GLDN	gliomedin	342035	0.159186	0.0369535
	TC19002138.hg.1	MIA-RAB4B	MIA-RAB4B readthrough (NMD candidate)	100529262	0.158988	0.0382825
	TC19000756.hg.1	NR1H2	nuclear receptor subfamily 1, group H, member 2	7376	0.158115	0.0143768
	TC0X000782.hg.1	FUNDC2	FUN14 domain containing 2	65991	0.157461	0.0357864
	TC0X001369.hg.1	RAP2C	RAP2C, member of RAS oncogene family	57826	0.156378	0.0176636
	TC6_cox_hap2000175.hg.1	NEU1	sialidase 1 (lysosomal sialidase)	4758	0.15525	0.00326538
	TC0X001024.hg.1	GRIPAP1	GRIP1 associated protein 1	56850	0.155024	0.0283562
	TC19001518.hg.1	PAF1	Paf1, RNA polymerase II associated factor, homolog (S. cerevisiae)	54623	0.154501	0.0157182
	TC01003417.hg.1	DEDD	death effector domain containing	9191	0.151925	0.0319134
	TC07003390.hg.1	ZNRF2	zinc and ring finger 2	223082	0.149804	0.0236332
	TC16001256.hg.1	TXNL4B	thioredoxin-like 4B	54957	0.149781	0.0139644
	TC11001247.hg.1	SLC25A22	solute carrier family 25 (mitochondrial carrier: glutamate), member 22	79751	0.149571	0.023929
	TC08001686.hg.1	PTK2	protein tyrosine kinase 2	5747	0.149242	0.0419292
	TC20000541.hg.1	TBC1D20	TBC1 domain family, member 20	128637	0.147152	0.00804797
	TC02002797.hg.1	DNPEP	aspartyl aminopeptidase	23549	0.145683	0.00264653
	TC0X001165.hg.1	ZDHHC15	zinc finger, DHHC-type containing 15	158866	0.144697	0.0181625
	TC12000841.hg.1	USP30	ubiquitin specific peptidase 30	84749	0.144185	0.0379306
	TC06001726.hg.1	MED20	mediator complex subunit 20	9477	0.143523	0.0395997
	TC6_ssto_hap7000206.hg.1	ABHD16A	abhydrolase domain containing 16A	7920	0.142389	0.00787632
	TC0X000361.hg.1	STARD8	StAR-related lipid transfer (START) domain containing 8	9754	0.139482	0.0364328
	TC22000823.hg.1	RANGAP1	Ran GTPase activating protein 1	5905	0.13943	0.00402536
	TC6_cox_hap2000034.hg.1	HLA-L	major histocompatibility complex, class I, L (pseudogene)	3139	0.134536	0.0194349
	TC08000565.hg.1	FAM92A1	family with sequence similarity 92, member A1	137392	0.134328	0.00736153
	TC09000709.hg.1	PPP2R4	protein phosphatase 2A activator, regulatory subunit 4	5524	0.120418	0.0209364
	TC22000423.hg.1	PPP6R2	protein phosphatase 6, regulatory subunit 2	9701	-0.0786152	0.0394206
	TC01002120.hg.1	PANK4	pantothenate kinase 4	55229	-0.0937392	0.0386531
	TC09000077.hg.1	CCDC171	coiled-coil domain containing 171	203238	-0.0965086	0.0498496
	TC15001828.hg.1	POLG	polymerase (DNA directed), gamma	5428	-0.0999299	0.0262462
	TC20000796.hg.1	UQCC1	ubiquinol-cytochrome c reductase complex assembly factor 1	55245	-0.100805	0.0254291
	TC14002292.hg.1	PABPN1	poly(A) binding protein, nuclear 1	8106	-0.102277	0.0431051
	TC17001402.hg.1	MYO19	myosin XIX	80179	-0.102762	0.0363378
	TC17001144.hg.1	ZNF18	zinc finger protein 18	7566	-0.10377	0.0356223
	TC07003338.hg.1	STAG3	stromal antigen 3	10734	-0.103816	0.0475955
	TC20000253.hg.1	CEP250	centrosomal protein 250kDa	11190	-0.1054	0.0332104
	TC09001730.hg.1	SDCCAG3	serologically defined colon cancer antigen 3	10807	-0.106592	0.0346414
	TC6_mann_hap4000183.hg.1	TRIM39	tripartite motif containing 39	56658	-0.106942	0.0228026
	TC03000293.hg.1	TCTA	T-cell leukemia translocation altered	6988	-0.10906	0.0250189
	TC22000421.hg.1	SELO	selenoprotein O	83642	-0.109222	0.0237049
	TC10000204.hg.1	SVIL-AS1	SVIL antisense RNA 1	102724316	-0.110608	0.0315205
	TC22000902.hg.1	BRD1	bromodomain containing 1	23774	-0.11137	0.0292604
	TC12003234.hg.1	FAM66C	family with sequence similarity 66, member C	440078	-0.11139	0.039089
	TC03000692.hg.1	IFT122	intraflagellar transport 122	55764	-0.112452	0.0105225
	TC09001686.hg.1	MED22	mediator complex subunit 22	6837	-0.113086	0.0158601
	TC03002184.hg.1	IQCG	IQ motif containing G	84223	-0.113259	0.0473732
	TC10001411.hg.1	USP54	ubiquitin specific peptidase 54	159195	-0.114318	0.00399914
	TC03003317.hg.1	P4HTM	prolyl 4-hydroxylase, transmembrane (endoplasmic reticulum)	54681	-0.114463	0.0406809
	TC02001455.hg.1	ASB1	ankyrin repeat and SOCS box containing 1	51665	-0.114581	0.0404177
	TC11002017.hg.1	ORAOV1	oral cancer overexpressed 1	220064	-0.115815	0.0200064
	TC04000028.hg.1	TACC3	transforming, acidic coiled-coil containing protein 3	10460	-0.115895	0.0178801
	TC17002897.hg.1	RAD51D	RAD51 paralog D	5892	-0.116994	0.0107721
	TC16001721.hg.1	AFG3L1P	AFG3-like AAA ATPase 1, pseudogene	172	-0.117533	0.02508
	TC07000801.hg.1	NRF1	nuclear respiratory factor 1	4899	-0.117615	0.0387901
	TC20000636.hg.1	TASP1	taspase, threonine aspartase, 1	55617	-0.118582	0.0418494
	TC01006306.hg.1	GON4L	gon-4-like (C. elegans)	54856	-0.119136	0.0459454
	TC19001254.hg.1	AKAP8L	A kinase (PRKA) anchor protein 8-like	26993	-0.120794	0.0319134
	TC11000797.hg.1	NEU3	sialidase 3 (membrane sialidase)	10825	-0.120918	0.0258299
	TC01000384.hg.1	TRNAU1AP	tRNA selenocysteine 1 associated protein 1	54952	-0.121123	0.00569758
	TC10002939.hg.1	AGAP11	ankyrin repeat and GTPase domain Arf GTPase activating protein 11	119385	-0.121333	0.0204553
	TC12003223.hg.1	EMG1	EMG1 N1-specific pseudouridine methyltransferase	10436	-0.122734	0.0362169
	TC19000800.hg.1	ZNF578	zinc finger protein 578	147660	-0.122813	0.0114901
	TC06000600.hg.1	ABCC10	ATP-binding cassette, sub-family C (CFTR/MRP), member 10	89845	-0.123796	0.00677175
	TC0X001525.hg.1	MECP2	methyl CpG binding protein 2	4204	-0.124213	0.0287863
	TC07003315.hg.1	SUN1	Sad1 and UNC84 domain containing 1	23353	-0.124661	0.00693443
	TC14001304.hg.1	ABCD4	ATP-binding cassette, sub-family D (ALD), member 4	5826	-0.1249	0.000835103
	TC10000703.hg.1	ZFYVE27	zinc finger, FYVE domain containing 27	118813	-0.124954	0.00886532
	TC13000687.hg.1	MRPS31P5	mitochondrial ribosomal protein S31 pseudogene 5	100887750	-0.12557	0.00546084
	TC19002682.hg.1	ZNF20	zinc finger protein 20	7568	-0.126763	0.0491032
	TC19001079.hg.1	SAFB2	scaffold attachment factor B2	9667	-0.127082	0.017541
	TC11001871.hg.1	EML3	echinoderm microtubule associated protein like 3	256364	-0.127364	0.0366313
	TC10001763.hg.1	LINC00959	long intergenic non-protein coding RNA 959	387723	-0.127615	0.034732
	TC16002070.hg.1	PAGR1	PAXIP1 associated glutamate-rich protein 1	79447	-0.129205	0.0490976
	TC02002535.hg.1	SP3	Sp3 transcription factor	6670	-0.130289	0.0351153
	TC02005044.hg.1	CCNT2-AS1	CCNT2 antisense RNA 1	100129961	-0.130414	0.0221975
	TC07001646.hg.1	ZNF394	zinc finger protein 394	84124	-0.130445	0.0270107
	TC02001308.hg.1	BCS1L	BC1 (ubiquinol-cytochrome c reductase) synthesis-like	617	-0.131266	0.0258711
	TC11002266.hg.1	C11orf65	chromosome 11 open reading frame 65	160140	-0.131692	0.0370859
	TC09001774.hg.1	DPH7	diphthamide biosynthesis 7	92715	-0.131821	0.0222718
	TC02005046.hg.1	LOC100130691	uncharacterized LOC100130691	100130691	-0.132638	0.045558
	TC06000597.hg.1	CUL9	cullin 9	23113	-0.133106	0.00326538
	TC16002073.hg.1	PHKG2	phosphorylase kinase, gamma 2 (testis)	5261	-0.133209	0.0225281
	TC03003349.hg.1	EXOSC7	exosome component 7	23016	-0.133229	0.0082519
	TC02002117.hg.1	FAHD2B	fumarylacetoacetate hydrolase domain containing 2B	151313	-0.134133	0.00947887
	TC19001807.hg.1	ZNF320	zinc finger protein 320	162967	-0.134344	0.0202259
	TC19000405.hg.1	ZNF726	zinc finger protein 726	730087	-0.134445	0.045686
	TC11002770.hg.1	RNF121	ring finger protein 121	55298	-0.134502	0.019799
	TC19000934.hg.1	ZNF264	zinc finger protein 264	9422	-0.134505	0.04591
	TC0X001123.hg.1	BCYRN1	brain cytoplasmic RNA 1	618	-0.134514	0.0254757
	TC19000207.hg.1	ZNF491	zinc finger protein 491	126069	-0.134555	0.0337456
	TC19000810.hg.1	ZNF761	zinc finger protein 761	388561	-0.134601	0.0485919
	TC19001138.hg.1	ZNF558	zinc finger protein 558	148156	-0.134727	0.0336675
	TC05001873.hg.1	FCHSD1	FCH and double SH3 domains 1	89848	-0.134859	0.028709
	TC07001758.hg.1	IMMP2L	IMP2 inner mitochondrial membrane peptidase-like (S. cerevisiae)	83943	-0.13542	0.0470912
	TC07000658.hg.1	LOC100289561	uncharacterized LOC100289561	100289561	-0.135559	0.00545933
	TC17001920.hg.1	CYTH1	cytohesin 1	9267	-0.136259	0.0390049
	TC17001626.hg.1	OSBPL7	oxysterol binding protein-like 7	114881	-0.13648	0.0299391
	TC10000769.hg.1	CNNM2	cyclin and CBS domain divalent metal cation transport mediator 2	54805	-0.13661	0.0440951
	TC01003743.hg.1	DSTYK	dual serine/threonine and tyrosine protein kinase	25778	-0.136822	0.0385201
	TC07001115.hg.1	ZNF890P	zinc finger protein 890, pseudogene	645700	-0.137341	0.045499
	TC17001524.hg.1	KAT2A	K(lysine) acetyltransferase 2A	2648	-0.138099	0.0394055
	TC07003318.hg.1	RBAK	RB-associated KRAB zinc finger	57786	-0.138356	0.00285211
	TC19001164.hg.1	TYK2	tyrosine kinase 2	7297	-0.138655	0.0206548
	TC14000780.hg.1	ZNF839	zinc finger protein 839	55778	-0.13934	0.00552798
	TC03001394.hg.1	DALRD3	DALR anticodon binding domain containing 3	55152	-0.139735	0.00885415
	TC03000332.hg.1	GLYCTK	glycerate kinase	132158	-0.139812	0.0198971
	TC22000786.hg.1	PLA2G6	phospholipase A2, group VI (cytosolic, calcium-independent)	8398	-0.140049	0.0492461
	TC20000894.hg.1	ZNF335	zinc finger protein 335	63925	-0.140403	0.0065057
	TC01002574.hg.1	LEPRE1	leucine proline-enriched proteoglycan (leprecan) 1	64175	-0.140721	0.00374616
	TC21000555.hg.1	MCM3AP	minichromosome maintenance complex component 3 associated protein	8888	-0.14125	0.0370859
	TC06000985.hg.1	ENPP1	ectonucleotide pyrophosphatase/phosphodiesterase 1	5167	-0.141764	0.0410113
	TC15002811.hg.1	CATSPER2	cation channel, sperm associated 2	117155	-0.142064	0.0381889
	TC01001380.hg.1	PPOX	protoporphyrinogen oxidase	5498	-0.142144	0.00725974
	TC02001319.hg.1	ZFAND2B	zinc finger, AN1-type domain 2B	130617	-0.142947	0.0108334
	TC02001664.hg.1	KIF3C	kinesin family member 3C	3797	-0.14329	0.0288939
	TC15000693.hg.1	GOLGA6D	golgin A6 family, member D	653643	-0.143343	0.0397396
	TC10002872.hg.1	FAM24B-CUZD1	FAM24B-CUZD1 readthrough	100533195	-0.143589	0.0453282
	TC09000455.hg.1	PTPDC1	protein tyrosine phosphatase domain containing 1	138639	-0.143856	0.0148812
	TC12001550.hg.1	MAP3K12	mitogen-activated protein kinase kinase kinase 12	7786	-0.144305	0.00548013
	TC07003354.hg.1	C7orf25	chromosome 7 open reading frame 25	79020	-0.144667	0.0282761
	TC02000465.hg.1	SEMA4F	sema domain, immunoglobulin domain (Ig), transmembrane domain (TM) and short cytoplasmic domain, (semaphorin) 4F	10505	-0.144862	0.023677
	TC22001224.hg.1	KLHL22	kelch-like family member 22	84861	-0.14519	0.0313868
	TC04001062.hg.1	LDB2	LIM domain binding 2	9079	-0.14538	0.0472073
	TC07001127.hg.1	CYTH3	cytohesin 3	9265	-0.145451	0.0172393
	TC17000988.hg.1	SMG6	SMG6 nonsense mediated mRNA decay factor	23293	-0.145642	0.0242465
	TC05001011.hg.1	NSD1	nuclear receptor binding SET domain protein 1	64324	-0.146148	0.047497
	TC05003423.hg.1	C1QTNF3	C1q and tumor necrosis factor related protein 3	114899	-0.146527	0.00740242
	TC06000093.hg.1	SIRT5	sirtuin 5	23408	-0.14654	0.045977
	TC16000336.hg.1	INO80E	INO80 complex subunit E	283899	-0.146622	0.0128696
	TC09000752.hg.1	POMT1	protein-O-mannosyltransferase 1	10585	-0.14667	0.00276335
	TC12003039.hg.1	GOLGA2P5	golgin A2 pseudogene 5	55592	-0.147063	0.0132653
	TC17001974.hg.1	CCDC57	coiled-coil domain containing 57	284001	-0.147656	0.00657408
	TC19000518.hg.1	ZNF540	zinc finger protein 540	163255	-0.147677	0.00779518
	TC07000993.hg.1	ZNF862	zinc finger protein 862	643641	-0.148036	0.0161607
	TC08000917.hg.1	FAM66B	family with sequence similarity 66, member B	100128890	-0.148992	0.0440367
	TC21000260.hg.1	PCNT	pericentrin	5116	-0.149396	0.0257019
	TC03000335.hg.1	NISCH	nischarin	11188	-0.149596	0.000587917
	TC07001676.hg.1	GIGYF1	GRB10 interacting GYF protein 1	64599	-0.149928	0.0050353
	TC14000978.hg.1	SDR39U1	short chain dehydrogenase/reductase family 39U, member 1	56948	-0.149929	0.0384722
	TC15001649.hg.1	ULK3	unc-51 like kinase 3	25989	-0.150173	0.00450141
	TC01005232.hg.1	TP73-AS1	TP73 antisense RNA 1	57212	-0.151091	0.00924067
	TC16001272.hg.1	WDR59	WD repeat domain 59	79726	-0.151599	0.0161607
	TC05000732.hg.1	HARS2	histidyl-tRNA synthetase 2, mitochondrial	23438	-0.152793	0.0153392
	TC20001734.hg.1	NPEPL1	aminopeptidase-like 1	79716	-0.153331	0.00750887
	TC10001445.hg.1	DLG5	discs, large homolog 5 (Drosophila)	9231	-0.153821	0.0239437
	TC06000512.hg.1	ZNF76	zinc finger protein 76	7629	-0.153909	0.00343616
	TC15000692.hg.1	GOLGA6C	golgin A6 family, member C	653641	-0.154144	0.023211
	TC0X001936.hg.1	TAZ	tafazzin	6901	-0.154482	0.0190323
	TC07000612.hg.1	CNPY4	canopy FGF signaling regulator 4	245812	-0.154721	0.00199131
	TC10001609.hg.1	FBXW4	F-box and WD repeat domain containing 4	6468	-0.154734	0.0161607
	TC07000607.hg.1	ZKSCAN1	zinc finger with KRAB and SCAN domains 1	7586	-0.154761	0.0368265
	TC06000344.hg.1	ATAT1	alpha tubulin acetyltransferase 1	79969	-0.155061	0.0434198
	TC07001495.hg.1	NSUN5	NOP2/Sun domain family, member 5	55695	-0.155097	0.0168345
	TC09000662.hg.1	RALGPS1	Ral GEF with PH domain and SH3 binding motif 1	9649	-0.15517	0.0367021
	TC03001337.hg.1	ZNF445	zinc finger protein 445	353274	-0.155567	0.00186925
	TC15002640.hg.1	LOC645752	golgin A6 family, member A pseudogene	645752	-0.155795	0.0122794
	TC0X002308.hg.1	ARHGAP4	Rho GTPase activating protein 4	393	-0.155822	0.0077372
	TC12001068.hg.1	ZNF84	zinc finger protein 84	7637	-0.156405	0.0466374
	TC10001057.hg.1	CDNF	cerebral dopamine neurotrophic factor	441549	-0.157567	0.033668
	TC08000222.hg.1	EXTL3	exostosin-like glycosyltransferase 3	2137	-0.157783	0.0216087
	TC17000958.hg.1	TBCD	tubulin folding cofactor D	6904	-0.157917	0.00525106
	TC02000019.hg.1	TRAPPC12	trafficking protein particle complex 12	51112	-0.158053	0.00195123
	TC03003318.hg.1	WDR6	WD repeat domain 6	11180	-0.15872	0.0415538
	TC12001993.hg.1	RBM19	RNA binding motif protein 19	9904	-0.158937	0.00106308
	TC14001560.hg.1	AKT1	v-akt murine thymoma viral oncogene homolog 1	207	-0.158966	0.00359366
	TC21000436.hg.1	HLCS	holocarboxylase synthetase (biotin-(proprionyl-CoA-carboxylase (ATP-hydrolysing)) ligase)	3141	-0.159305	0.026208
	TC15000035.hg.1	GOLGA8EP	golgin A8 family, member E, pseudogene	390535	-0.159517	0.0184135
	TC12001632.hg.1	AGAP2	ArfGAP with GTPase domain, ankyrin repeat and PH domain 2	116986	-0.159886	0.0375773
	TC01002657.hg.1	CC2D1B	coiled-coil and C2 domain containing 1B	200014	-0.160153	2.33e-05
	TC22000129.hg.1	BCR	breakpoint cluster region	613	-0.160492	0.0315385
	TC05001585.hg.1	MBLAC2	metallo-beta-lactamase domain containing 2	153364	-0.161062	0.0442064
	TC12000296.hg.1	BICD1	bicaudal D homolog 1 (Drosophila)	636	-0.161157	0.00479084
	TC19000327.hg.1	MYO9B	myosin IXB	4650	-0.161394	0.0431908
	TC22000548.hg.1	PPM1F	protein phosphatase, Mg2+/Mn2+ dependent, 1F	9647	-0.161519	0.043909
	TC12000853.hg.1	TCHP	trichoplein, keratin filament binding	84260	-0.161712	0.000829542
	TC12001469.hg.1	LMBR1L	limb development membrane protein 1-like	55716	-0.161762	0.00637844
	TC06001972.hg.1	HACE1	HECT domain and ankyrin repeat containing E3 ubiquitin protein ligase 1	57531	-0.161876	0.0437608
	TC10002954.hg.1	FAM24B	family with sequence similarity 24, member B	196792	-0.16201	0.0268347
	TC06001580.hg.1	RXRB	retinoid X receptor, beta	6257	-0.163195	0.0479315
	TC21000117.hg.1	EVA1C	eva-1 homolog C (C. elegans)	59271	-0.163337	0.015131
	TC10001553.hg.1	ENTPD1-AS1	ENTPD1 antisense RNA 1	728558	-0.164149	0.0215826
	TC12000572.hg.1	RASSF3	Ras association (RalGDS/AF-6) domain family member 3	283349	-0.164394	0.0495148
	TC07001654.hg.1	MCM7	minichromosome maintenance complex component 7	4176	-0.164876	0.0177113
	TC20000118.hg.1	ZNF133	zinc finger protein 133	7692	-0.164876	0.00435282
	TC19002338.hg.1	ZNF625-ZNF20	ZNF625-ZNF20 readthrough (NMD candidate)	100529855	-0.165026	0.0366072
	TC15001786.hg.1	WDR73	WD repeat domain 73	84942	-0.16504	0.00894503
	TC06001062.hg.1	LOC100507557	uncharacterized LOC100507557	100507557	-0.165133	0.0458284
	TC15000315.hg.1	JMJD7	jumonji domain containing 7	100137047	-0.165147	0.00354942
	TC16000707.hg.1	TCF25	transcription factor 25 (basic helix-loop-helix)	22980	-0.165614	0.0179071
	TC03000212.hg.1	ZNF621	zinc finger protein 621	285268	-0.165629	0.00829318
	TC19000514.hg.1	HKR1	HKR1, GLI-Kruppel zinc finger family member	284459	-0.165653	0.030401
	TC19002639.hg.1	ZNF222	zinc finger protein 222	7673	-0.165984	0.0346414
	TC16000313.hg.1	NFATC2IP	nuclear factor of activated T-cells, cytoplasmic, calcineurin-dependent 2 interacting protein	84901	-0.166026	0.00357713
	TC14000202.hg.1	NUBPL	nucleotide binding protein-like	80224	-0.166079	0.012703
	TC18000251.hg.1	ZNF407	zinc finger protein 407	55628	-0.166344	0.0436054
	TC08001760.hg.1	ZNF251	zinc finger protein 251	90987	-0.166387	0.0128887
	TC11002413.hg.1	MSANTD2	Myb/SANT-like DNA-binding domain containing 2	79684	-0.166432	0.0448741
	TC04000057.hg.1	ZBTB49	zinc finger and BTB domain containing 49	166793	-0.166544	0.000563569
	TC11001214.hg.1	VPS26B	vacuolar protein sorting 26 homolog B (S. pombe)	112936	-0.166792	0.0125759
	TC16001095.hg.1	SIAH1	siah E3 ubiquitin protein ligase 1	6477	-0.167008	0.00445832
	TC03000992.hg.1	EIF2B5	eukaryotic translation initiation factor 2B, subunit 5 epsilon, 82kDa	8893	-0.167116	0.00520998
	TC15002808.hg.1	PPIP5K1	diphosphoinositol pentakisphosphate kinase 1	9677	-0.167365	0.000570055
	TC17000984.hg.1	SMYD4	SET and MYND domain containing 4	114826	-0.167507	0.015131
	TC01002662.hg.1	ECHDC2	enoyl CoA hydratase domain containing 2	55268	-0.167642	0.00526808
	TC22000232.hg.1	DEPDC5	DEP domain containing 5	9681	-0.16844	0.0311325
	TC02002683.hg.1	ICA1L	islet cell autoantigen 1,69kDa-like	130026	-0.168675	4.94e-05
	TC16000327.hg.1	KIF22	kinesin family member 22	3835	-0.168833	0.0161669
	TC04000973.hg.1	MXD4	MAX dimerization protein 4	10608	-0.16884	0.0107733
	TC17000023.hg.1	SGSM2	small G protein signaling modulator 2	9905	-0.169373	0.00245936
	TC16000317.hg.1	SNX29P2	sorting nexin 29 pseudogene 2	440352	-0.169671	0.00630527
	TC11000302.hg.1	DNAJC24	DnaJ (Hsp40) homolog, subfamily C, member 24	120526	-0.169939	0.033982
	TC02000573.hg.1	FAHD2A	fumarylacetoacetate hydrolase domain containing 2A	51011	-0.169995	0.00159176
	TC11000683.hg.1	ANKRD13D	ankyrin repeat domain 13 family, member D	338692	-0.170434	0.0417935
	TC22001433.hg.1	PI4KA	phosphatidylinositol 4-kinase, catalytic, alpha	5297	-0.170593	0.043669
	TC01002917.hg.1	LRRC39	leucine rich repeat containing 39	127495	-0.170625	0.0319669
	TC12001539.hg.1	KRT8	keratin 8	3856	-0.171269	0.0158238
	TC08001347.hg.1	PEX2	peroxisomal biogenesis factor 2	5828	-0.171484	0.0381857
	TC19000248.hg.1	DCAF15	DDB1 and CUL4 associated factor 15	90379	-0.171582	0.00767713
	TC02005033.hg.1	CCDC142	coiled-coil domain containing 142	84865	-0.171682	0.000378594
	TC03000193.hg.1	EXOG	endo/exonuclease (5'-3'), endonuclease G-like	9941	-0.171716	0.00743413
	TC19001809.hg.1	ZNF321P	zinc finger protein 321, pseudogene	399669	-0.171818	0.0400354
	TC05001826.hg.1	BRD8	bromodomain containing 8	10902	-0.172095	0.00451154
	TC07003394.hg.1	GATAD1	GATA zinc finger domain containing 1	57798	-0.172141	0.0181066
	TC20000474.hg.1	CDH26	cadherin 26	60437	-0.172201	0.0197059
	TC20000566.hg.1	PCED1A	PC-esterase domain containing 1A	64773	-0.17228	0.0423608
	TC16000119.hg.1	ZNF263	zinc finger protein 263	10127	-0.173007	0.00120662
	TC18000258.hg.1	ZNF236	zinc finger protein 236	7776	-0.173373	0.00893012
	TC22000495.hg.1	C22orf39	chromosome 22 open reading frame 39	128977	-0.17413	7.47e-05
	TC09001538.hg.1	FBXW2	F-box and WD repeat domain containing 2	26190	-0.174157	0.00458899
	TC12002155.hg.1	ANKLE2	ankyrin repeat and LEM domain containing 2	23141	-0.174225	0.00086909
	TC01006334.hg.1	MSTO1	misato 1, mitochondrial distribution and morphology regulator	55154	-0.174489	0.0142703
	TC19001727.hg.1	PNKP	polynucleotide kinase 3'-phosphatase	11284	-0.174626	0.00529919
	TC19002624.hg.1	ZNF700	zinc finger protein 700	90592	-0.174796	0.0119926
	TC17001380.hg.1	RDM1	RAD52 motif containing 1	201299	-0.175451	0.0143268
	TC09000718.hg.1	LINC00963	long intergenic non-protein coding RNA 963	100506190	-0.175637	0.0156118
	TC08002625.hg.1	ZNF250	zinc finger protein 250	58500	-0.175869	0.000726828
	TC19000388.hg.1	ZNF714	zinc finger protein 714	148206	-0.175892	0.042545
	TC0X002310.hg.1	AKAP17A	A kinase (PRKA) anchor protein 17A	8227	-0.1765	0.00106308
	TC06002995.hg.1	TRAF3IP2-AS1	TRAF3IP2 antisense RNA 1	643749	-0.176515	0.0404177
	TC12001115.hg.1	CRACR2A	calcium release activated channel regulator 2A	84766	-0.17676	0.00657352
	TC07001996.hg.1	ZNF786	zinc finger protein 786	136051	-0.177199	0.00216349
	TC12002063.hg.1	KDM2B	lysine (K)-specific demethylase 2B	84678	-0.177266	0.0319134
	TC17000907.hg.1	ENGASE	endo-beta-N-acetylglucosaminidase	64772	-0.177462	0.0111279
	TC19000239.hg.1	MRI1	methylthioribose-1-phosphate isomerase 1	84245	-0.177607	0.0131388
	TC04000040.hg.1	NOP14-AS1	NOP14 antisense RNA 1	317648	-0.177852	0.00438296
	TC05001137.hg.1	MED10	mediator complex subunit 10	84246	-0.178053	0.0458055
	TC07000056.hg.1	ZNF815P	zinc finger protein 815, pseudogene	401303	-0.178165	0.0158458
	TC12001049.hg.1	ULK1	unc-51 like autophagy activating kinase 1	8408	-0.178262	0.0497486
	TC06001199.hg.1	FAM120B	family with sequence similarity 120B	84498	-0.178519	0.00274962
	TC22000130.hg.1	FBXW4P1	F-box and WD repeat domain containing 4 pseudogene 1	26226	-0.178891	0.0268195
	TC14002325.hg.1	L3HYPDH	L-3-hydroxyproline dehydratase (trans-)	112849	-0.179107	0.0408298
	TC17000854.hg.1	TSEN54	TSEN54 tRNA splicing endonuclease subunit	283989	-0.179114	0.0386196
	TC02001687.hg.1	IFT172	intraflagellar transport 172	26160	-0.179801	2.25e-05
	TC19000210.hg.1	ZNF69	zinc finger protein 69	7620	-0.180229	0.0399405
	TC07001885.hg.1	WDR91	WD repeat domain 91	29062	-0.180968	5.59e-05
	TC09000489.hg.1	CCDC180	coiled-coil domain containing 180	100499483	-0.182009	0.000128185
	TC06000240.hg.1	VN1R10P	vomeronasal 1 receptor 10 pseudogene	387316	-0.182364	0.0219261
	TC05001013.hg.1	RGS14	regulator of G-protein signaling 14	10636	-0.184137	0.00688108
	TC02002928.hg.1	NDUFA10	NADH dehydrogenase (ubiquinone) 1 alpha subcomplex, 10, 42kDa	4705	-0.184591	0.000292205
	TC03003339.hg.1	CLDND1	claudin domain containing 1	56650	-0.184806	0.0163089
	TC11001757.hg.1	TRIM64C	tripartite motif containing 64C	646754	-0.184878	0.028364
	TC12000174.hg.1	LOH12CR1	loss of heterozygosity, 12, chromosomal region 1	118426	-0.185284	0.0128269
	TC02001904.hg.1	WDPCP	WD repeat containing planar cell polarity effector	51057	-0.185337	0.00314064
	TC19000944.hg.1	ZNF773	zinc finger protein 773	374928	-0.18586	0.0459454
	TC12001046.hg.1	SFSWAP	splicing factor, suppressor of white-apricot family	6433	-0.186608	0.00208662
	TC02002715.hg.1	PLEKHM3	pleckstrin homology domain containing, family M, member 3	389072	-0.186744	0.0138448
	TC09000634.hg.1	NEK6	NIMA-related kinase 6	10783	-0.187185	0.0455724
	TC15000010.hg.1	GOLGA8CP	golgin A8 family, member C, pseudogene	729786	-0.187206	0.00323989
	TC17001017.hg.1	ZZEF1	zinc finger, ZZ-type with EF-hand domain 1	23140	-0.187364	0.0314451
	TC10000457.hg.1	NUDT13	nudix (nucleoside diphosphate linked moiety X)-type motif 13	25961	-0.187579	0.0042959
	TC12000810.hg.1	TXNRD1	thioredoxin reductase 1	7296	-0.187691	0.0078629
	TC19000125.hg.1	ARHGEF18	Rho/Rac guanine nucleotide exchange factor (GEF) 18	23370	-0.188624	0.0295716
	TC18000578.hg.1	ZADH2	zinc binding alcohol dehydrogenase domain containing 2	284273	-0.188707	0.0252055
	TC10002953.hg.1	CUZD1	CUB and zona pellucida-like domains 1	50624	-0.188949	0.0104802
	TC22000703.hg.1	MYH9	myosin, heavy chain 9, non-muscle	4627	-0.18906	0.0027591
	TC07000525.hg.1	ADAM22	ADAM metallopeptidase domain 22	53616	-0.189273	0.00129271
	TC05002059.hg.1	STK10	serine/threonine kinase 10	6793	-0.18991	0.00143162
	TC03001431.hg.1	NPRL2	nitrogen permease regulator-like 2 (S. cerevisiae)	10641	-0.19004	8.25e-05
	TC05002805.hg.1	BRD9	bromodomain containing 9	65980	-0.190123	0.00333704
	TC09000884.hg.1	AK3	adenylate kinase 3	50808	-0.1908	0.0118177
	TC13000425.hg.1	TMCO3	transmembrane and coiled-coil domains 3	55002	-0.191025	0.00629843
	TC01003706.hg.1	KDM5B	lysine (K)-specific demethylase 5B	10765	-0.191157	0.0312585
	TC13000532.hg.1	LINC00426	long intergenic non-protein coding RNA 426	100188949	-0.191254	0.00918156
	TC05003410.hg.1	C5orf45	chromosome 5 open reading frame 45	51149	-0.191322	0.00323989
	TC07002502.hg.1	LOC100630923	LOC100289561-PRKRIP1 readthrough	100630923	-0.191346	0.00425512
	TC16002093.hg.1	KLHDC4	kelch domain containing 4	54758	-0.19159	0.00204262
	TC17000848.hg.1	NUP85	nucleoporin 85kDa	79902	-0.191747	0.00377037
	TC19002041.hg.1	ZNF738	zinc finger protein 738	148203	-0.191748	0.0222718
	TC0X001405.hg.1	ZNF75D	zinc finger protein 75D	7626	-0.191811	0.000976469
	TC11002333.hg.1	LOC100652768	uncharacterized LOC100652768	100652768	-0.192021	0.0100583
	TC03000985.hg.1	KLHL24	kelch-like family member 24	54800	-0.192117	0.0319099
	TC02002113.hg.1	SEMA4C	sema domain, immunoglobulin domain (Ig), transmembrane domain (TM) and short cytoplasmic domain, (semaphorin) 4C	54910	-0.192525	0.0113317
	TC19002664.hg.1	ZNF211	zinc finger protein 211	10520	-0.193305	0.00363055
	TC15000194.hg.1	FAN1	FANCD2/FANCI-associated nuclease 1	22909	-0.193866	0.0188953
	TC11000060.hg.1	TSPAN32	tetraspanin 32	10077	-0.194171	0.00754085
	TC20000482.hg.1	LSM14B	LSM14B, SCD6 homolog B (S. cerevisiae)	149986	-0.194432	0.000271672
	TC19000208.hg.1	ZNF440	zinc finger protein 440	126070	-0.195097	0.0480116
	TC10001276.hg.1	ERCC6	excision repair cross-complementation group 6	2074	-0.195249	0.0290512
	TC04000009.hg.1	PIGG	phosphatidylinositol glycan anchor biosynthesis, class G	54872	-0.195294	0.000802223
	TC11000579.hg.1	NAA40	N(alpha)-acetyltransferase 40, NatD catalytic subunit	79829	-0.195361	0.000551186
	TC22000302.hg.1	CBY1	chibby homolog 1 (Drosophila)	25776	-0.195802	0.000862164
	TC06002333.hg.1	WDR27	WD repeat domain 27	253769	-0.19628	0.000242405
	TC19001136.hg.1	ADAMTS10	ADAM metallopeptidase with thrombospondin type 1 motif, 10	81794	-0.196372	0.00624956
	TC16000698.hg.1	SPG7	spastic paraplegia 7 (pure and complicated autosomal recessive)	6687	-0.196381	2.28e-05
	TC07000596.hg.1	ZNF789	zinc finger protein 789	285989	-0.196473	0.00593574
	TC19000589.hg.1	ARHGEF1	Rho guanine nucleotide exchange factor (GEF) 1	9138	-0.196519	0.00151249
	TC09002897.hg.1	IL11RA	interleukin 11 receptor, alpha	3590	-0.196684	0.0245662
	TC15001044.hg.1	GOLGA8DP	golgin A8 family, member D, pseudogene	100132979	-0.19721	0.00147364
	TC15000710.hg.1	PSTPIP1	proline-serine-threonine phosphatase interacting protein 1	9051	-0.19723	0.000912702
	TC03002898.hg.1	IP6K2	inositol hexakisphosphate kinase 2	51447	-0.197619	0.047798
	TC01000361.hg.1	SYTL1	synaptotagmin-like 1	84958	-0.197688	0.00172632
	TC03000186.hg.1	DLEC1	deleted in lung and esophageal cancer 1	9940	-0.198186	0.00175968
	TC17000488.hg.1	THRA	thyroid hormone receptor, alpha	7067	-0.198712	0.0286612
	TC08000324.hg.1	AP3M2	adaptor-related protein complex 3, mu 2 subunit	10947	-0.198924	0.0210296
	TC16000148.hg.1	ABAT	4-aminobutyrate aminotransferase	18	-0.199014	0.0477229
	TC09000217.hg.1	TRMT10B	tRNA methyltransferase 10 homolog B (S. cerevisiae)	158234	-0.199036	0.0215424
	TC02001466.hg.1	DUSP28	dual specificity phosphatase 28	285193	-0.199341	0.000351177
	TC12000597.hg.1	DYRK2	dual-specificity tyrosine-(Y)-phosphorylation regulated kinase 2	8445	-0.199932	0.0190579
	TC01003096.hg.1	PDE4DIP	phosphodiesterase 4D interacting protein	9659	-0.200141	0.00034055
	TC03000589.hg.1	ZBTB20-AS1	ZBTB20 antisense RNA 1	100131117	-0.200552	0.0173304
	TC19000509.hg.1	ZNF568	zinc finger protein 568	374900	-0.200855	0.0051448
	TC04002399.hg.1	MGC39584	uncharacterized LOC441058	441058	-0.200961	0.0417208
	TC03001459.hg.1	GLT8D1	glycosyltransferase 8 domain containing 1	55830	-0.201684	0.0443774
	TC09001536.hg.1	CDK5RAP2	CDK5 regulatory subunit associated protein 2	55755	-0.201837	0.0168345
	TC22000908.hg.1	TUBGCP6	tubulin, gamma complex associated protein 6	85378	-0.2021	0.000772002
	TC02004921.hg.1	RBM44	RNA binding motif protein 44	375316	-0.202485	0.00470056
	TC19000620.hg.1	ZNF226	zinc finger protein 226	7769	-0.202688	0.00827681
	TC10001187.hg.1	ZNF248	zinc finger protein 248	57209	-0.202769	0.0391459
	TC19002666.hg.1	ZNF587	zinc finger protein 587	84914	-0.204643	0.0254753
	TC09002589.hg.1	SMC5-AS1	SMC5 antisense RNA 1 (head to head)	100507299	-0.204748	0.0323115
	TC02004972.hg.1	WBP1	WW domain binding protein 1	23559	-0.204983	0.00626181
	TC04000431.hg.1	CCNG2	cyclin G2	901	-0.205135	0.00778423
	TC01000253.hg.1	OTUD3	OTU deubiquitinase 3	23252	-0.205185	0.00711875
	TC11003436.hg.1	TPH1	tryptophan hydroxylase 1	7166	-0.205349	0.00461077
	TC06000513.hg.1	DEF6	differentially expressed in FDCP 6 homolog (mouse)	50619	-0.205716	0.000100252
	TC10001691.hg.1	RAB11FIP2	RAB11 family interacting protein 2 (class I)	22841	-0.205779	0.0241146
	TC07001617.hg.1	PON2	paraoxonase 2	5445	-0.206104	0.0381857
	TC07000975.hg.1	ZNF398	zinc finger protein 398	57541	-0.206977	0.00351679
	TC15002777.hg.1	PARP6	poly (ADP-ribose) polymerase family, member 6	56965	-0.207049	0.0289837
	TC19002222.hg.1	ZNF525	zinc finger protein 525	170958	-0.207051	0.0403685
	TC6_qbl_hap6000119.hg.1	ZNRD1-AS1	ZNRD1 antisense RNA 1	80862	-0.207062	0.00566019
	TC08000343.hg.1	SPIDR	scaffolding protein involved in DNA repair	23514	-0.207424	0.000867939
	TC15001277.hg.1	ZSCAN29	zinc finger and SCAN domain containing 29	146050	-0.207541	0.0185603
	TC11003444.hg.1	DNHD1	dynein heavy chain domain 1	144132	-0.208803	0.00466389
	TC22000566.hg.1	ZNF70	zinc finger protein 70	7621	-0.208853	0.00675374
	TC03000058.hg.1	TATDN2	TatD DNase domain containing 2	9797	-0.209022	0.0150512
	TC07000465.hg.1	GTF2IRD2B	GTF2I repeat domain containing 2B	389524	-0.209164	0.00136079
	TC16000381.hg.1	CLUHP3	clustered mitochondria (cluA/CLU1) homolog pseudogene 3	100132341	-0.209324	0.0182638
	TC15000756.hg.1	IL16	interleukin 16	3603	-0.209362	0.000224588
	TC19000507.hg.1	ZNF790-AS1	ZNF790 antisense RNA 1	284408	-0.209735	0.000694493
	TC17000089.hg.1	ACAP1	ArfGAP with coiled-coil, ankyrin repeat and PH domains 1	9744	-0.209975	0.034732
	TC11001415.hg.1	LYVE1	lymphatic vessel endothelial hyaluronan receptor 1	10894	-0.210153	0.0419197
	TC06001965.hg.1	USP45	ubiquitin specific peptidase 45	85015	-0.210594	0.0211015
	TC01000338.hg.1	LOC101928303	uncharacterized LOC101928303	101928303	-0.210727	0.00292308
	TC01004054.hg.1	SMYD3	SET and MYND domain containing 3	64754	-0.211445	0.00245301
	TC02000048.hg.1	IAH1	isoamyl acetate-hydrolyzing esterase 1 homolog (S. cerevisiae)	285148	-0.212182	0.00122548
	TC19001195.hg.1	ZNF44	zinc finger protein 44	51710	-0.212227	0.0150869
	TC17001913.hg.1	TMC6	transmembrane channel-like 6	11322	-0.212436	0.00485778
	TC08000069.hg.1	TNKS	tankyrase, TRF1-interacting ankyrin-related ADP-ribose polymerase	8658	-0.212519	0.0346925
	TC12000029.hg.1	ITFG2	integrin alpha FG-GAP repeat containing 2	55846	-0.21286	0.0405655
	TC0X001251.hg.1	SLC25A53	solute carrier family 25, member 53	401612	-0.212989	0.0224264
	TC01005783.hg.1	PDZK1P2	PDZ domain containing 1 pseudogene 2	100034743	-0.213474	0.0345601
	TC14000390.hg.1	ZBTB1	zinc finger and BTB domain containing 1	22890	-0.213714	0.0152626
	TC22001495.hg.1	SUN2	Sad1 and UNC84 domain containing 2	25777	-0.214311	0.0250052
	TC01000850.hg.1	BTBD8	BTB (POZ) domain containing 8	284697	-0.214714	0.0176339
	TC19002224.hg.1	TPM3P9	tropomyosin 3 pseudogene 9	147804	-0.215388	0.02666
	TC05001036.hg.1	ZNF354B	zinc finger protein 354B	117608	-0.215453	0.00803234
	TC01003218.hg.1	CDC42SE1	CDC42 small effector 1	56882	-0.215668	0.0102246
	TC01002945.hg.1	HENMT1	HEN1 methyltransferase homolog 1 (Arabidopsis)	113802	-0.215698	0.00377101
	TC06002248.hg.1	TFB1M	transcription factor B1, mitochondrial	51106	-0.215892	0.0145088
	TC22000801.hg.1	CBX7	chromobox homolog 7	23492	-0.216125	0.000329041
	TC01003211.hg.1	CTSK	cathepsin K	1513	-0.216217	0.0393685
	TC10001017.hg.1	SFMBT2	Scm-like with four mbt domains 2	57713	-0.21629	0.0282093
	TC21000134.hg.1	MRPS6	mitochondrial ribosomal protein S6	64968	-0.216346	0.0448954
	TC10001409.hg.1	MSS51	MSS51 mitochondrial translational activator	118490	-0.216642	0.0236811
	TC6_dbb_hap3000068.hg.1	SAPCD1	suppressor APC domain containing 1	401251	-0.217213	1.71e-05
	TC19000515.hg.1	ZNF527	zinc finger protein 527	84503	-0.217861	0.000925213
	TC01006350.hg.1	LOC653160	uncharacterized LOC653160	653160	-0.217999	0.0186349
	TC05003433.hg.1	APBB3	amyloid beta (A4) precursor protein-binding, family B, member 3	10307	-0.218085	0.00463125
	TC12001924.hg.1	MTERF2	mitochondrial transcription termination factor 2	80298	-0.218855	0.00290356
	TC02000721.hg.1	PSD4	pleckstrin and Sec7 domain containing 4	23550	-0.218909	8.4e-05
	TC02002086.hg.1	ANKRD20A8P	ankyrin repeat domain 20 family, member A8, pseudogene	729171	-0.219256	0.0162402
	TC05002170.hg.1	TRIM52	tripartite motif containing 52	84851	-0.219725	0.00192532
	TC01005888.hg.1	DCAF8	DDB1 and CUL4 associated factor 8	50717	-0.220001	0.00701583
	TC07001354.hg.1	SEPT7P2	septin 7 pseudogene 2	641977	-0.220439	0.00276636
	TC01003683.hg.1	KIF21B	kinesin family member 21B	23046	-0.220729	0.000428865
	TC10000946.hg.1	INPP5A	inositol polyphosphate-5-phosphatase, 40kDa	3632	-0.221029	0.0207195
	TC17002153.hg.1	LRRC37BP1	leucine rich repeat containing 37B pseudogene 1	147172	-0.221163	0.000652218
	TC01000435.hg.1	S100PBP	S100P binding protein	64766	-0.221354	0.00177846
	TC11001009.hg.1	PTS	6-pyruvoyltetrahydropterin synthase	5805	-0.221675	0.00233032
	TC01003052.hg.1	NBPF7	neuroblastoma breakpoint family, member 7	343505	-0.221849	0.0348277
	TC06001911.hg.1	PGM3	phosphoglucomutase 3	5238	-0.221859	0.0279929
	TC19001438.hg.1	ZNF792	zinc finger protein 792	126375	-0.222211	0.0480694
	TC16001228.hg.1	PDXDC2P	pyridoxal-dependent decarboxylase domain containing 2, pseudogene	283970	-0.222443	0.0496409
	TC05000158.hg.1	SPEF2	sperm flagellar 2	79925	-0.222556	0.00153421
	TC14002312.hg.1	KLC1	kinesin light chain 1	3831	-0.222576	0.0152223
	TC15001092.hg.1	HERC2	HECT and RLD domain containing E3 ubiquitin protein ligase 2	8924	-0.223215	0.000671116
	TC16001444.hg.1	SNX29P1	sorting nexin 29 pseudogene 1	100652781	-0.223927	0.0434201
	TC21000350.hg.1	N6AMT1	N-6 adenine-specific DNA methyltransferase 1 (putative)	29104	-0.224	0.0373219
	TC13000453.hg.1	PSPC1	paraspeckle component 1	55269	-0.224467	0.0364249
	TC02005036.hg.1	RNF103	ring finger protein 103	7844	-0.224723	0.000467035
	TC01000788.hg.1	FAM73A	family with sequence similarity 73, member A	374986	-0.225068	0.0141143
	TC19001415.hg.1	LOC400685	uncharacterized LOC400685	400685	-0.225725	0.00918101
	TC05001113.hg.1	LOC728613	programmed cell death 6 pseudogene	728613	-0.226061	0.00822223
	TC16000240.hg.1	C16orf52	chromosome 16 open reading frame 52	730094	-0.227005	0.00130396
	TC21000462.hg.1	HMGN1	high mobility group nucleosome binding domain 1	3150	-0.227326	0.0389695
	TC04000226.hg.1	WDR19	WD repeat domain 19	57728	-0.22776	0.0299973
	TC03001353.hg.1	FYCO1	FYVE and coiled-coil domain containing 1	79443	-0.228264	0.00294874
	TC15001295.hg.1	EIF3J-AS1	EIF3J antisense RNA 1 (head to head)	645212	-0.228432	0.000862345
	TC10002969.hg.1	FAM53B	family with sequence similarity 53, member B	9679	-0.228983	0.0229076
	TC02000235.hg.1	NDUFAF7	NADH dehydrogenase (ubiquinone) complex I, assembly factor 7	55471	-0.230375	0.0019499
	TC19001256.hg.1	RASAL3	RAS protein activator like 3	64926	-0.230484	0.0068635
	TC07001514.hg.1	GTF2IRD2	GTF2I repeat domain containing 2	84163	-0.230608	0.00261125
	TC07003347.hg.1	COX19	cytochrome c oxidase assembly homolog 19 (S. cerevisiae)	90639	-0.230882	0.000203285
	TC15001233.hg.1	PLCB2	phospholipase C, beta 2	5330	-0.231153	0.0472073
	TC06000281.hg.1	ZSCAN26	zinc finger and SCAN domain containing 26	7741	-0.231357	0.00343616
	TC05003368.hg.1	FAM193B	family with sequence similarity 193, member B	54540	-0.231786	0.00440547
	TC03001739.hg.1	ZXDC	ZXD family zinc finger C	79364	-0.231986	0.00377101
	TC12001571.hg.1	ITGA5	integrin, alpha 5 (fibronectin receptor, alpha polypeptide)	3678	-0.23226	0.0413342
	TC01003049.hg.1	ZNF697	zinc finger protein 697	90874	-0.232598	0.0218548
	TC16002097.hg.1	NPIPA8	nuclear pore complex interacting protein family, member A8	101059953	-0.232682	0.00205798
	TC17001377.hg.1	HEATR9	HEAT repeat containing 9	256957	-0.23327	0.0215792
	TC17000705.hg.1	MSI2	musashi RNA-binding protein 2	124540	-0.233766	0.0109903
	TC16000198.hg.1	PKD1P1	polycystic kidney disease 1 (autosomal dominant) pseudogene 1	339044	-0.233819	0.0055146
	TC15001557.hg.1	MTFMT	mitochondrial methionyl-tRNA formyltransferase	123263	-0.233955	0.0457838
	TC15002104.hg.1	GOLGA8F	golgin A8 family, member F	100132565	-0.234069	3.34e-05
	TC07003337.hg.1	PVRIG	poliovirus receptor related immunoglobulin domain containing	79037	-0.234746	0.0294497
	TC03000588.hg.1	TIGIT	T cell immunoreceptor with Ig and ITIM domains	201633	-0.234895	0.0219241
	TC11003237.hg.1	LOC100133315	transient receptor potential cation channel, subfamily C, member 2-like	100133315	-0.234961	0.0193437
	TC01000271.hg.1	NBPF3	neuroblastoma breakpoint family, member 3	84224	-0.235216	0.00948731
	TC01001112.hg.1	CHD1L	chromodomain helicase DNA binding protein 1-like	9557	-0.235428	0.0134174
	TC04000948.hg.1	ZNF721	zinc finger protein 721	170960	-0.23557	0.0227725
	TC0X001262.hg.1	TSC22D3	TSC22 domain family, member 3	1831	-0.235734	0.0123792
	TC06001195.hg.1	ERMARD	ER membrane-associated RNA degradation	55780	-0.236274	0.00920147
	TC22000546.hg.1	YPEL1	yippee-like 1 (Drosophila)	29799	-0.236639	0.00892918
	TC14001436.hg.1	CCDC88C	coiled-coil domain containing 88C	440193	-0.236997	0.0129323
	TC10001190.hg.1	SEPT7P9	septin 7 pseudogene 9	285961	-0.237053	0.00160159
	TC01002679.hg.1	HSPB11	heat shock protein family B (small), member 11	51668	-0.23714	0.00190977
	TC07001121.hg.1	RNF216	ring finger protein 216	54476	-0.237239	0.0113497
	TC02001415.hg.1	ATG16L1	autophagy related 16-like 1 (S. cerevisiae)	55054	-0.237709	0.00323989
	TC13000887.hg.1	TUBGCP3	tubulin, gamma complex associated protein 3	10426	-0.237787	0.0163047
	TC06000524.hg.1	MAPK13	mitogen-activated protein kinase 13	5603	-0.237924	0.000450057
	TC07000665.hg.1	FAM185A	family with sequence similarity 185, member A	222234	-0.238097	0.0171865
	TC17000618.hg.1	CDK5RAP3	CDK5 regulatory subunit associated protein 3	80279	-0.239073	0.0152351
	TC12003267.hg.1	ZNF10	zinc finger protein 10	7556	-0.239085	0.0116165
	TC09000928.hg.1	BNC2	basonuclin 2	54796	-0.239255	0.00119573
	TC01000463.hg.1	AGO1	argonaute RISC catalytic component 1	26523	-0.23957	0.0315972
	TC03001087.hg.1	SDHAP2	succinate dehydrogenase complex, subunit A, flavoprotein pseudogene 2	727956	-0.239604	0.02082
	TC19000937.hg.1	ZNF460	zinc finger protein 460	10794	-0.239748	0.00207055
	TC19000943.hg.1	ZNF419	zinc finger protein 419	79744	-0.239986	0.00584164
	TC01005077.hg.1	ZNF678	zinc finger protein 678	339500	-0.240501	0.0337526
	TC03002045.hg.1	DNAJC19	DnaJ (Hsp40) homolog, subfamily C, member 19	131118	-0.240572	0.0378396
	TC12001941.hg.1	SSH1	slingshot protein phosphatase 1	54434	-0.240977	0.000765159
	TC16000709.hg.1	DEF8	differentially expressed in FDCP 8 homolog (mouse)	54849	-0.241129	0.00277266
	TC05001389.hg.1	PDE4D	phosphodiesterase 4D, cAMP-specific	5144	-0.241145	0.00853919
	TC22000547.hg.1	MAPK1	mitogen-activated protein kinase 1	5594	-0.241657	0.0369423
	TC03001772.hg.1	PLXND1	plexin D1	23129	-0.242026	0.0365837
	TC09002929.hg.1	KDM4C	lysine (K)-specific demethylase 4C	23081	-0.24206	0.0102773
	TC09001508.hg.1	AKNA	AT-hook transcription factor	80709	-0.242093	0.00215928
	TC19000325.hg.1	SIN3B	SIN3 transcription regulator family member B	23309	-0.242197	0.000165489
	TC01006345.hg.1	SLC35E2	solute carrier family 35, member E2	9906	-0.242314	0.00905745
	TC04002943.hg.1	THAP9-AS1	THAP9 antisense RNA 1	100499177	-0.242699	0.0454799
	TC02002135.hg.1	REV1	REV1, polymerase (DNA directed)	51455	-0.243446	0.0288197
	TC19002564.hg.1	ZNF577	zinc finger protein 577	84765	-0.243972	0.0354302
	TC21001057.hg.1	CRYZL1	crystallin, zeta (quinone reductase)-like 1	9946	-0.244299	0.0201698
	TC07001663.hg.1	GATS	GATS, stromal antigen 3 opposite strand	352954	-0.244645	0.00755859
	TC12000698.hg.1	LINC00936	long intergenic non-protein coding RNA 936	338758	-0.244753	0.0342994
	TC08000798.hg.1	PTP4A3	protein tyrosine phosphatase type IVA, member 3	11156	-0.244857	0.0298228
	TC03001666.hg.1	KIAA1407	KIAA1407	57577	-0.245342	9.28e-05
	TC07000491.hg.1	LOC100133091	uncharacterized LOC100133091	100133091	-0.24536	0.00315856
	TC05003448.hg.1	C1QTNF3-AMACR	C1QTNF3-AMACR readthrough (NMD candidate)	100534612	-0.245604	0.00126064
	TC02004920.hg.1	LRRFIP1	leucine rich repeat (in FLII) interacting protein 1	9208	-0.245972	0.0362046
	TC15000322.hg.1	STARD9	StAR-related lipid transfer (START) domain containing 9	57519	-0.246206	0.000194096
	TC10002411.hg.1	KLF6	Kruppel-like factor 6	1316	-0.246816	0.0491596
	TC01001518.hg.1	ZBTB37	zinc finger and BTB domain containing 37	84614	-0.246839	0.00329783
	TC17001313.hg.1	PHF12	PHD finger protein 12	57649	-0.246989	0.00416694
	TC12000326.hg.1	TMEM117	transmembrane protein 117	84216	-0.247644	0.00316549
	TC11000362.hg.1	TTC17	tetratricopeptide repeat domain 17	55761	-0.247656	0.0266415
	TC01003008.hg.1	AP4B1	adaptor-related protein complex 4, beta 1 subunit	10717	-0.247745	0.00125968
	TC20000735.hg.1	ZNF337	zinc finger protein 337	26152	-0.247774	0.00612043
	TC11000184.hg.1	AMPD3	adenosine monophosphate deaminase 3	272	-0.248208	0.00265702
	TC15002281.hg.1	UBL7-AS1	UBL7 antisense RNA 1 (head to head)	440288	-0.248528	2.28e-05
	TC16000949.hg.1	RRN3P3	RNA polymerase I transcription factor homolog (S. cerevisiae) pseudogene 3	100131998	-0.248616	0.0285524
	TC02001614.hg.1	WDR35	WD repeat domain 35	57539	-0.249199	0.0118367
	TC04001535.hg.1	MFSD8	major facilitator superfamily domain containing 8	256471	-0.249252	0.0119424
	TC03003362.hg.1	PHLDB2	pleckstrin homology-like domain, family B, member 2	90102	-0.249414	0.0121077
	TC15002784.hg.1	SNRPN	small nuclear ribonucleoprotein polypeptide N	6638	-0.249848	0.0285524
	TC19001906.hg.1	ZNF417	zinc finger protein 417	147687	-0.250162	0.00545933
	TC15000031.hg.1	HERC2P7	hect domain and RLD 2 pseudogene 7	100132101	-0.250337	0.0168166
	TC19001088.hg.1	RFX2	regulatory factor X, 2 (influences HLA class II expression)	5990	-0.250551	0.0494754
	TC09001749.hg.1	ABCA2	ATP-binding cassette, sub-family A (ABC1), member 2	20	-0.250641	0.00373399
	TC11000007.hg.1	NLRP6	NLR family, pyrin domain containing 6	171389	-0.251154	0.0139459
	TC03002154.hg.1	SDHAP1	succinate dehydrogenase complex, subunit A, flavoprotein pseudogene 1	255812	-0.251263	0.0261978
	TC14001217.hg.1	ZBTB25	zinc finger and BTB domain containing 25	7597	-0.251264	0.0160355
	TC10000269.hg.1	CSGALNACT2	chondroitin sulfate N-acetylgalactosaminyltransferase 2	55454	-0.251375	0.0271055
	TC09002896.hg.1	GALT	galactose-1-phosphate uridylyltransferase	2592	-0.251564	0.0312585
	TC0X002360.hg.1	LINC00630	long intergenic non-protein coding RNA 630	100287765	-0.251572	8.06e-05
	TC0Y000013.hg.1	CD99P1	CD99 molecule pseudogene 1	401577	-0.251657	0.018752
	TC20000473.hg.1	FAM217B	family with sequence similarity 217, member B	63939	-0.251833	0.00498258
	TC11002334.hg.1	PCSK7	proprotein convertase subtilisin/kexin type 7	9159	-0.252038	0.00451154
	TC05001472.hg.1	ANKRA2	ankyrin repeat, family A (RFXANK-like), 2	57763	-0.252432	0.0342442
	TC15001730.hg.1	STARD5	StAR-related lipid transfer (START) domain containing 5	80765	-0.252607	0.00448209
	TC17000120.hg.1	CHD3	chromodomain helicase DNA binding protein 3	1107	-0.252777	0.0198705
	TC02001430.hg.1	AGAP1	ArfGAP with GTPase domain, ankyrin repeat and PH domain 1	116987	-0.253021	0.0174169
	TC15002072.hg.1	GOLGA8S	golgin A8 family, member S	653061	-0.253347	0.000156906
	TC07003014.hg.1	SPDYE8P	speedy/RINGO cell cycle regulator family member E8, pseudogene	728524	-0.253646	0.0290862
	TC05000281.hg.1	SREK1	splicing regulatory glutamine/lysine-rich protein 1	140890	-0.253961	0.0338791
	TC14000922.hg.1	METTL3	methyltransferase like 3	56339	-0.254623	0.00603053
	TC01005417.hg.1	PPIEL	peptidylprolyl isomerase E-like pseudogene	728448	-0.255173	0.00592426
	TC03002817.hg.1	XPC	xeroderma pigmentosum, complementation group C	7508	-0.255342	0.00311588
	TC17001015.hg.1	ATP2A3	ATPase, Ca++ transporting, ubiquitous	489	-0.255657	0.00452818
	TC09001324.hg.1	AUH	AU RNA binding protein/enoyl-CoA hydratase	549	-0.256334	0.0287965
	TC01002876.hg.1	LOC100131564	uncharacterized LOC100131564	100131564	-0.256336	0.0236057
	TC14000074.hg.1	METTL17	methyltransferase like 17	64745	-0.256566	0.00837995
	TC03001433.hg.1	CACNA2D2	calcium channel, voltage-dependent, alpha 2/delta subunit 2	9254	-0.256917	0.0470912
	TC01004765.hg.1	MSTO2P	misato family member 2, pseudogene	100129405	-0.256931	0.00302562
	TC22001176.hg.1	PANX2	pannexin 2	56666	-0.257054	0.0261975
	TC06001896.hg.1	HMGN3	high mobility group nucleosomal binding domain 3	9324	-0.257398	0.0306267
	TC19002648.hg.1	ZNF808	zinc finger protein 808	388558	-0.257519	0.000751561
	TC07000432.hg.1	PMS2L2	postmeiotic segregation increased 2-like 2 pseudogene	5380	-0.257774	0.0176339
	TC01002866.hg.1	GLMN	glomulin, FKBP associated protein	11146	-0.257798	0.0372919
	TC06001732.hg.1	TRERF1	transcriptional regulating factor 1	55809	-0.258023	0.0147649
	TC07003313.hg.1	PILRB	paired immunoglobin-like type 2 receptor beta	29990	-0.25815	0.00803234
	TC04000652.hg.1	JADE1	jade family PHD finger 1	79960	-0.258174	0.000191725
	TC01002384.hg.1	PAFAH2	platelet-activating factor acetylhydrolase 2, 40kDa	5051	-0.258179	0.0144664
	TC12001141.hg.1	IFFO1	intermediate filament family orphan 1	25900	-0.259034	0.000367111
	TC16000820.hg.1	NLRC3	NLR family, CARD domain containing 3	197358	-0.259134	8.6e-05
	TC07002005.hg.1	ZNF746	zinc finger protein 746	155061	-0.259264	0.00639883
	TC05001502.hg.1	F2RL2	coagulation factor II (thrombin) receptor-like 2	2151	-0.260013	0.00736153
	TC15000817.hg.1	SCAND2P	SCAN domain containing 2 pseudogene	54581	-0.260329	0.00232131
	TC09001585.hg.1	SCAI	suppressor of cancer cell invasion	286205	-0.260823	0.0297849
	TC19000426.hg.1	DPY19L3	dpy-19-like 3 (C. elegans)	147991	-0.261004	0.025906
	TC05001983.hg.1	FNDC9	fibronectin type III domain containing 9	408263	-0.261123	0.014527
	TC05001747.hg.1	C5orf63	chromosome 5 open reading frame 63	401207	-0.261464	0.0225008
	TC19000066.hg.1	S1PR4	sphingosine-1-phosphate receptor 4	8698	-0.261785	0.00552798
	TC07001469.hg.1	PMS2P4	postmeiotic segregation increased 2 pseudogene 4	5382	-0.262085	0.00842379
	TC06001293.hg.1	ATXN1	ataxin 1	6310	-0.262325	0.0426691
	TC12000122.hg.1	LOC101927905	uncharacterized LOC101927905	101927905	-0.262397	0.00862897
	TC04000903.hg.1	SNX25	sorting nexin 25	83891	-0.262612	0.0433017
	TC12000604.hg.1	SLC35E3	solute carrier family 35, member E3	55508	-0.262632	0.000494956
	TC09001541.hg.1	TRAF1	TNF receptor-associated factor 1	7185	-0.263183	0.00621468
	TC06000935.hg.1	PLN	phospholamban	5350	-0.263263	0.0199104
	TC03003368.hg.1	PIGX	phosphatidylinositol glycan anchor biosynthesis, class X	54965	-0.263736	0.0219497
	TC0X000255.hg.1	RBM3	RNA binding motif (RNP1, RRM) protein 3	5935	-0.264119	0.0440887
	TC20000999.hg.1	SYCP2	synaptonemal complex protein 2	10388	-0.264376	0.044116
	TC18000262.hg.1	ATP9B	ATPase, class II, type 9B	374868	-0.264766	0.00285129
	TC10001624.hg.1	ARL3.00	ADP-ribosylation factor-like 3	403	-0.265109	0.000254585
	TC0Y000014.hg.1	CD99	CD99 molecule	4267	-0.265565	0.0149565
	TC07003030.hg.1	PMS2P3	postmeiotic segregation increased 2 pseudogene 3	5387	-0.265932	0.00172746
	TC04000074.hg.1	KIAA0232	KIAA0232	9778	-0.266599	0.0273789
	TC13000483.hg.1	SACS	sacsin molecular chaperone	26278	-0.266633	0.00897822
	TC11000876.hg.1	PRSS23	protease, serine, 23	11098	-0.26701	0.0468539
	TC05001573.hg.1	TMEM161B	transmembrane protein 161B	153396	-0.267507	0.0282517
	TC10001585.hg.1	DNMBP	dynamin binding protein	23268	-0.268361	0.00243291
	TC09001400.hg.1	C9orf156	chromosome 9 open reading frame 156	51531	-0.268406	0.00230471
	TC11001140.hg.1	TBRG1	transforming growth factor beta regulator 1	84897	-0.268519	0.00982901
	TC01002935.hg.1	AMY1A	amylase, alpha 1A (salivary)	276	-0.269096	0.0144251
	TC02004931.hg.1	ZNF514	zinc finger protein 514	84874	-0.269301	0.00195123
	TC07002489.hg.1	STAG3L5P-PVRIG2P-PILRB	STAG3L5P-PVRIG2P-PILRB readthrough	101752399	-0.269662	0.0161669
	TC02000788.hg.1	SFT2D3	SFT2 domain containing 3	84826	-0.270002	0.00910452
	TC02001738.hg.1	HEATR5B	HEAT repeat containing 5B	54497	-0.271437	0.0472073
	TC04000013.hg.1	PCGF3	polycomb group ring finger 3	10336	-0.272261	0.00813445
	TC19002667.hg.1	ZNF586	zinc finger protein 586	54807	-0.272278	0.0440903
	TC15001544.hg.1	HERC1	HECT and RLD domain containing E3 ubiquitin protein ligase family member 1	8925	-0.272592	0.0155615
	TC01002741.hg.1	JAK1	Janus kinase 1	3716	-0.272668	0.00767713
	TC10002707.hg.1	BMS1P4	BMS1 pseudogene 4	729096	-0.272812	0.00940734
	TC05000490.hg.1	FAM174A	family with sequence similarity 174, member A	345757	-0.272952	0.00347851
	TC16001342.hg.1	RNF166	ring finger protein 166	115992	-0.273254	0.000224384
	TC07000280.hg.1	CCM2	cerebral cavernous malformation 2	83605	-0.274033	0.000572336
	TC08001427.hg.1	RBM12B	RNA binding motif protein 12B	389677	-0.27413	0.0373219
	TC06001838.hg.1	GUSBP4	glucuronidase, beta pseudogene 4	375513	-0.274402	0.00438699
	TC05002494.hg.1	TMEM161B-AS1	TMEM161B antisense RNA 1	100505894	-0.274502	0.000946571
	TC12001530.hg.1	KRT73	keratin 73	319101	-0.274574	0.035009
	TC19001347.hg.1	ZNF737	zinc finger protein 737	100129842	-0.274647	0.0397196
	TC02002452.hg.1	CYTIP	cytohesin 1 interacting protein	9595	-0.2747	0.00894142
	TC18000500.hg.1	SMAD7	SMAD family member 7	4092	-0.274855	0.00406991
	TC03001660.hg.1	CFAP44	cilia and flagella associated protein 44	55779	-0.274902	0.0106935
	TC19001802.hg.1	ZNF83	zinc finger protein 83	55769	-0.275111	0.035198
	TC07003320.hg.1	GLCCI1	glucocorticoid induced transcript 1	113263	-0.275222	0.0187055
	TC09001668.hg.1	RAPGEF1	Rap guanine nucleotide exchange factor (GEF) 1	2889	-0.275226	0.000146777
	TC13000895.hg.1	DCUN1D2	DCN1, defective in cullin neddylation 1, domain containing 2	55208	-0.276107	2.19e-06
	TC11001348.hg.1	OR56A4	olfactory receptor, family 56, subfamily A, member 4	120793	-0.276292	0.00498875
	TC02000599.hg.1	INPP4A	inositol polyphosphate-4-phosphatase, type I, 107kDa	3631	-0.277008	0.000489412
	TC16002056.hg.1	NFATC3	nuclear factor of activated T-cells, cytoplasmic, calcineurin-dependent 3	4775	-0.277241	0.0144305
	TC03001670.hg.1	ZBTB20	zinc finger and BTB domain containing 20	26137	-0.277625	0.0159308
	TC02000874.hg.1	MGAT5	mannosyl (alpha-1,6-)-glycoprotein beta-1,6-N-acetyl-glucosaminyltransferase	4249	-0.278295	0.0243699
	TC16002043.hg.1	NPIPA1	nuclear pore complex interacting protein family, member A1	9284	-0.279355	0.00221207
	TC02001111.hg.1	ANKAR	ankyrin and armadillo repeat containing	150709	-0.279932	0.00146181
	TC08001599.hg.1	TMEM65	transmembrane protein 65	157378	-0.279949	0.0166883
	TC17001064.hg.1	KIAA0753	KIAA0753	9851	-0.280078	0.00837683
	TC13001720.hg.1	BIVM	basic, immunoglobulin-like variable motif containing	54841	-0.280184	0.0321651
	TC16000045.hg.1	MAPK8IP3	mitogen-activated protein kinase 8 interacting protein 3	23162	-0.280831	1.14e-05
	TC0X000310.hg.1	TSPYL2	TSPY-like 2	64061	-0.28085	0.0159308
	TC15002013.hg.1	TARSL2	threonyl-tRNA synthetase-like 2	123283	-0.281298	0.042385
	TC10002946.hg.1	CUTC	cutC copper transporter	51076	-0.28162	0.000115363
	TC17000194.hg.1	MPRIP	myosin phosphatase Rho interacting protein	23164	-0.282139	0.000313489
	TC05001725.hg.1	CEP120	centrosomal protein 120kDa	153241	-0.282357	0.0410834
	TC02002619.hg.1	HIBCH	3-hydroxyisobutyryl-CoA hydrolase	26275	-0.283245	0.0133614
	TC09000047.hg.1	UHRF2	ubiquitin-like with PHD and ring finger domains 2, E3 ubiquitin protein ligase	115426	-0.283525	0.00947887
	TC11000688.hg.1	TBC1D10C	TBC1 domain family, member 10C	374403	-0.283869	0.000243737
	TC11001909.hg.1	RASGRP2	RAS guanyl releasing protein 2 (calcium and DAG-regulated)	10235	-0.283919	0.000691534
	TC01001751.hg.1	TRAF3IP3	TRAF3 interacting protein 3	80342	-0.284707	0.0130444
	TC15000774.hg.1	GOLGA6L9	golgin A6 family-like 9	440295	-0.284839	0.000222817
	TC22001423.hg.1	SFI1	Sfi1 homolog, spindle assembly associated (yeast)	9814	-0.285083	0.000667829
	TC18000581.hg.1	ZNF516	zinc finger protein 516	9658	-0.285699	0.0446547
	TC19000406.hg.1	ZNF254	zinc finger protein 254	9534	-0.28725	0.000264987
	TC01006385.hg.1	ACBD6	acyl-CoA binding domain containing 6	84320	-0.287293	4.16e-05
	TC03001248.hg.1	NGLY1	N-glycanase 1	55768	-0.287724	0.00205868
	TC19000724.hg.1	SNRNP70	small nuclear ribonucleoprotein 70kDa (U1)	6625	-0.288185	0.00377037
	TC07000234.hg.1	EEPD1	endonuclease/exonuclease/phosphatase family domain containing 1	80820	-0.288621	0.00126857
	TC06000427.hg.1	ITPR3	inositol 1,4,5-trisphosphate receptor, type 3	3710	-0.28877	0.0032539
	TC03003206.hg.1	TNIK	TRAF2 and NCK interacting kinase	23043	-0.289107	0.0230338
	TC15000030.hg.1	GOLGA8I	golgin A8 family, member I	283796	-0.289376	0.00935355
	TC15000465.hg.1	LOC101928784	uncharacterized LOC101928784	101928784	-0.291748	0.00489021
	TC08001521.hg.1	ANGPT1	angiopoietin 1	284	-0.29183	0.0388753
	TC03001312.hg.1	ULK4	unc-51 like kinase 4	54986	-0.292188	0.0231595
	TC03000333.hg.1	DNAH1	dynein, axonemal, heavy chain 1	25981	-0.292759	8.17e-05
	TC19000798.hg.1	ZNF528	zinc finger protein 528	84436	-0.293147	0.0128887
	TC06001990.hg.1	SCML4	sex comb on midleg-like 4 (Drosophila)	256380	-0.293604	0.0288381
	TC17000778.hg.1	CEP95	centrosomal protein 95kDa	90799	-0.294067	0.0370859
	TC03001661.hg.1	SPICE1	spindle and centriole associated protein 1	152185	-0.294521	0.00130636
	TC07001930.hg.1	KIAA1147	KIAA1147	57189	-0.294767	0.018752
	TC05003149.hg.1	FAM172A	family with sequence similarity 172, member A	83989	-0.296016	0.0164555
	TC04000006.hg.1	ZNF141	zinc finger protein 141	7700	-0.296999	0.0168176
	TC07003327.hg.1	KCTD7	potassium channel tetramerization domain containing 7	154881	-0.298633	7.06e-05
	TC11001192.hg.1	TMEM45B	transmembrane protein 45B	120224	-0.299128	0.0159962
	TC11000963.hg.1	DYNC2H1	dynein, cytoplasmic 2, heavy chain 1	79659	-0.299498	0.00188092
	TC02000587.hg.1	CNNM3	cyclin and CBS domain divalent metal cation transport mediator 3	26505	-0.299784	0.000149458
	TC11001384.hg.1	RIC3	RIC3 acetylcholine receptor chaperone	79608	-0.300195	0.0310191
	TC11001748.hg.1	FNBP4	formin binding protein 4	23360	-0.300338	0.0262938
	TC14001184.hg.1	DHRS7	dehydrogenase/reductase (SDR family) member 7	51635	-0.301692	0.00363055
	TC06000964.hg.1	TRMT11	tRNA methyltransferase 11 homolog (S. cerevisiae)	60487	-0.301835	0.00282847
	TC07000216.hg.1	BBS9	Bardet-Biedl syndrome 9	27241	-0.302152	0.0101701
	TC14000082.hg.1	ARHGEF40	Rho guanine nucleotide exchange factor (GEF) 40	55701	-0.302247	0.0209364
	TC01006431.hg.1	NBPF9	neuroblastoma breakpoint family, member 9	400818	-0.302563	0.0458284
	TC04001723.hg.1	CBR4	carbonyl reductase 4	84869	-0.302683	0.00246597
	TC22000172.hg.1	MIAT	myocardial infarction associated transcript (non-protein coding)	440823	-0.303179	0.000934436
	TC19002663.hg.1	ZNF548	zinc finger protein 548	147694	-0.303654	0.00242666
	TC08001069.hg.1	GNRH1	gonadotropin-releasing hormone 1 (luteinizing-releasing hormone)	2796	-0.30463	0.00358782
	TC07002389.hg.1	STAG3L4	stromal antigen 3-like 4 (pseudogene)	64940	-0.305098	0.00732739
	TC11002555.hg.1	MRVI1-AS1	MRVI1 antisense RNA 1	100129827	-0.305973	0.0330573
	TC18000277.hg.1	ENOSF1	enolase superfamily member 1	55556	-0.306395	0.00210786
	TC04000631.hg.1	SPATA5	spermatogenesis associated 5	166378	-0.306416	0.0211421
	TC08001494.hg.1	NCALD	neurocalcin delta	83988	-0.306513	0.000607207
	TC09001287.hg.1	AGTPBP1	ATP/GTP binding protein 1	23287	-0.306908	0.0168738
	TC03000277.hg.1	ZNF589	zinc finger protein 589	51385	-0.307039	0.000265025
	TC19001051.hg.1	MATK	megakaryocyte-associated tyrosine kinase	4145	-0.307593	0.017473
	TC11000009.hg.1	ATHL1	ATH1, acid trehalase-like 1 (yeast)	80162	-0.307826	0.0330945
	TC03003373.hg.1	THUMPD3-AS1	THUMPD3 antisense RNA 1	440944	-0.308018	0.0282093
	TC19001265.hg.1	EPS15L1	epidermal growth factor receptor pathway substrate 15-like 1	58513	-0.308151	0.00338178
	TC19002263.hg.1	LOC100128398	uncharacterized LOC100128398	100128398	-0.308898	0.00478846
	TC01003114.hg.1	GPR89A	G protein-coupled receptor 89A	653519	-0.309074	0.00939205
	TC03000756.hg.1	SLC25A36	solute carrier family 25 (pyrimidine nucleotide carrier ), member 36	55186	-0.309139	0.0121455
	TC13000021.hg.1	ZMYM2	zinc finger, MYM-type 2	7750	-0.309415	0.0294863
	TC01002271.hg.1	NBPF1	neuroblastoma breakpoint family, member 1	55672	-0.30951	0.0242393
	TC06000621.hg.1	RUNX2	runt-related transcription factor 2	860	-0.310238	0.0188117
	TC09001296.hg.1	LOC440173	uncharacterized LOC440173	440173	-0.310541	0.0248044
	TC01003298.hg.1	PBXIP1	pre-B-cell leukemia homeobox interacting protein 1	57326	-0.310945	0.00181805
	TC15001651.hg.1	FAM219B	family with sequence similarity 219, member B	57184	-0.311231	2.7e-05
	TC01001147.hg.1	NBPF15	neuroblastoma breakpoint family, member 15	284565	-0.31177	0.03064
	TC19001795.hg.1	ZNF841	zinc finger protein 841	284371	-0.312337	0.0319519
	TC19000425.hg.1	ZNF507	zinc finger protein 507	22847	-0.312876	0.0187055
	TC02000409.hg.1	GMCL1	germ cell-less, spermatogenesis associated 1	64395	-0.312952	0.0443506
	TC05001315.hg.1	LOC100132356	uncharacterized LOC100132356	100132356	-0.313269	0.00106594
	TC22000791.hg.1	DDX17	DEAD (Asp-Glu-Ala-Asp) box helicase 17	10521	-0.313449	0.0202785
	TC03001202.hg.1	MRPS25	mitochondrial ribosomal protein S25	64432	-0.313702	0.00105651
	TC03000880.hg.1	PPM1L	protein phosphatase, Mg2+/Mn2+ dependent, 1L	151742	-0.31378	0.0129004
	TC01000462.hg.1	AGO4	argonaute RISC catalytic component 4	192670	-0.314086	0.0243699
	TC20000726.hg.1	APMAP	adipocyte plasma membrane associated protein	57136	-0.314451	0.00521456
	TC19000957.hg.1	ZNF544	zinc finger protein 544	27300	-0.315649	4.04e-07
	TC07000269.hg.1	SPDYE1	speedy/RINGO cell cycle regulator family member E1	285955	-0.316105	0.0243604
	TC13000607.hg.1	VWA8	von Willebrand factor A domain containing 8	23078	-0.316118	0.0384514
	TC15000796.hg.1	TM6SF1	transmembrane 6 superfamily member 1	53346	-0.316152	0.041636
	TC01000282.hg.1	ZBTB40	zinc finger and BTB domain containing 40	9923	-0.316347	0.0063873
	TC22000890.hg.1	CERK	ceramide kinase	64781	-0.316906	6.9e-05
	TC06002186.hg.1	ADAT2	adenosine deaminase, tRNA-specific 2	134637	-0.317148	0.000181609
	TC0X000719.hg.1	LINC00894	long intergenic non-protein coding RNA 894	100272228	-0.317379	0.000643924
	TC12001807.hg.1	BTG1	B-cell translocation gene 1, anti-proliferative	694	-0.317445	0.0256529
	TC03003342.hg.1	NPHP3	nephronophthisis 3 (adolescent)	27031	-0.317567	0.0185909
	TC01000156.hg.1	VPS13D	vacuolar protein sorting 13 homolog D (S. cerevisiae)	55187	-0.317851	0.00195695
	TC07003297.hg.1	NSUN5P2	NOP2/Sun domain family, member 5 pseudogene 2	260294	-0.317856	0.000111106
	TC15001297.hg.1	PATL2	protein associated with topoisomerase II homolog 2 (yeast)	197135	-0.318029	0.0449935
	TC04000396.hg.1	SLC4A4	solute carrier family 4 (sodium bicarbonate cotransporter), member 4	8671	-0.318494	0.020478
	TC17001540.hg.1	EZH1	enhancer of zeste 1 polycomb repressive complex 2 subunit	2145	-0.318718	0.00528092
	TC6_mann_hap4000068.hg.1	MSH5	mutS homolog 5	4439	-0.31941	3.38e-05
	TC17000166.hg.1	MGC12916	uncharacterized protein MGC12916	84815	-0.319841	0.0132343
	TC05001986.hg.1	ADAM19	ADAM metallopeptidase domain 19	8728	-0.320272	0.014323
	TC20000702.hg.1	THBD	thrombomodulin	7056	-0.321089	0.00210544
	TC09000637.hg.1	LOC100129034	uncharacterized LOC100129034	100129034	-0.321382	0.0317295
	TC17000184.hg.1	PIGL	phosphatidylinositol glycan anchor biosynthesis, class L	9487	-0.322084	4.9e-05
	TC09000289.hg.1	LOC100132352	FSHD region gene 1 pseudogene	100132352	-0.322758	0.0356319
	TC02002946.hg.1	MTERF4	mitochondrial transcription termination factor 4	130916	-0.322826	0.00317638
	TC03001773.hg.1	TMCC1	transmembrane and coiled-coil domain family 1	23023	-0.323001	0.0248044
	TC12001913.hg.1	APPL2	adaptor protein, phosphotyrosine interaction, PH domain and leucine zipper containing 2	55198	-0.323074	0.0013507
	TC06001327.hg.1	TDP2	tyrosyl-DNA phosphodiesterase 2	51567	-0.323225	0.0168176
	TC17001052.hg.1	ZNF594	zinc finger protein 594	84622	-0.323532	0.00223145
	TC13000878.hg.1	ANKRD10	ankyrin repeat domain 10	55608	-0.323903	0.000510652
	TC14000263.hg.1	PRPF39	pre-mRNA processing factor 39	55015	-0.326539	0.0350287
	TC04000954.hg.1	LOC100129917	uncharacterized LOC100129917	100129917	-0.326863	0.000303295
	TC09002693.hg.1	XPA	xeroderma pigmentosum, complementation group A	7507	-0.326968	0.00426223
	TC07001764.hg.1	TMEM168	transmembrane protein 168	64418	-0.327427	0.0417208
	TC6_qbl_hap6000229.hg.1	HCG18	HLA complex group 18 (non-protein coding)	414777	-0.327952	0.000779141
	TC01001118.hg.1	GPR89B	G protein-coupled receptor 89B	51463	-0.328629	0.00486281
	TC19000974.hg.1	WASH5P	WAS protein family homolog 5 pseudogene	375690	-0.328744	0.0180043
	TC10001195.hg.1	ZNF33B	zinc finger protein 33B	7582	-0.328763	0.0114231
	TC01003901.hg.1	ITPKB	inositol-trisphosphate 3-kinase B	3707	-0.329007	0.000728757
	TC01000883.hg.1	PTBP2	polypyrimidine tract binding protein 2	58155	-0.329079	0.0115396
	TC02000524.hg.1	KDM3A	lysine (K)-specific demethylase 3A	55818	-0.329219	0.00438125
	TC15001606.hg.1	TLE3	transducin-like enhancer of split 3	7090	-0.329609	0.00799261
	TC01001758.hg.1	TRAF5	TNF receptor-associated factor 5	7188	-0.329657	0.0298396
	TC09001113.hg.1	ANKRD20A3	ankyrin repeat domain 20 family, member A3	441425	-0.331149	0.0045998
	TC22001254.hg.1	GUSBP11	glucuronidase, beta pseudogene 11	91316	-0.331205	0.00981314
	TC01002834.hg.1	ODF2L	outer dense fiber of sperm tails 2-like	57489	-0.332537	0.0469885
	TC18000567.hg.1	RTTN	rotatin	25914	-0.333041	0.00571635
	TC01000964.hg.1	RBM15	RNA binding motif protein 15	64783	-0.333492	0.00141071
	TC10001194.hg.1	ZNF37BP	zinc finger protein 37B, pseudogene	100129482	-0.33351	6.68e-05
	TC10001416.hg.1	AGAP5	ArfGAP with GTPase domain, ankyrin repeat and PH domain 5	729092	-0.334314	0.000912494
	TC10001420.hg.1	CAMK2G	calcium/calmodulin-dependent protein kinase II gamma	818	-0.334864	0.000296157
	TC02001419.hg.1	DGKD	diacylglycerol kinase, delta 130kDa	8527	-0.335044	3.15e-05
	TC17000675.hg.1	LUC7L3	LUC7-like 3 (S. cerevisiae)	51747	-0.335113	0.0492571
	TC01000703.hg.1	INADL	InaD-like (Drosophila)	10207	-0.335493	0.0455724
	TC09002907.hg.1	ORM1	orosomucoid 1	5004	-0.335679	0.0481349
	TC20000139.hg.1	KIZ	kizuna centrosomal protein	55857	-0.336711	0.000102752
	TC01000921.hg.1	AMY1B	amylase, alpha 1B (salivary)	277	-0.337232	0.00865028
	TC16000202.hg.1	NPIPA7	nuclear pore complex interacting protein family, member A7	101059938	-0.337444	0.00593589
	TC04000313.hg.1	KIT	v-kit Hardy-Zuckerman 4 feline sarcoma viral oncogene homolog	3815	-0.337821	0.0399331
	TC19001826.hg.1	NLRP12	NLR family, pyrin domain containing 12	91662	-0.337946	0.00176351
	TC12001423.hg.1	LINC00938	long intergenic non-protein coding RNA 938	400027	-0.338215	0.000454522
	TC06002829.hg.1	EFHC1	EF-hand domain (C-terminal) containing 1	114327	-0.338478	0.0122627
	TC11000950.hg.1	KIAA1377	KIAA1377	57562	-0.338649	0.00098053
	TC01002707.hg.1	MYSM1	Myb-like, SWIRM and MPN domains 1	114803	-0.338913	0.0113014
	TC07003015.hg.1	GTF2IRD2P1	GTF2I repeat domain containing 2 pseudogene 1	401375	-0.339073	0.0150503
	TC01006367.hg.1	NBPF11	neuroblastoma breakpoint family, member 11	200030	-0.339093	0.0150869
	TC10001906.hg.1	SEC61A2	Sec61 alpha 2 subunit (S. cerevisiae)	55176	-0.339124	0.00563416
	TC04001634.hg.1	LRBA	LPS-responsive vesicle trafficking, beach and anchor containing	987	-0.339224	0.0136003
	TC02000756.hg.1	PTPN4	protein tyrosine phosphatase, non-receptor type 4 (megakaryocyte)	5775	-0.339653	0.0350696
	TC02000594.hg.1	ZAP70	zeta-chain (TCR) associated protein kinase 70kDa	7535	-0.340079	0.000919431
	TC14000389.hg.1	AKAP5	A kinase (PRKA) anchor protein 5	9495	-0.340295	0.0025773
	TC12000030.hg.1	LOC100507424	uncharacterized LOC100507424	100507424	-0.340846	0.000390893
	TC09002932.hg.1	ANKRD20A1	ankyrin repeat domain 20 family, member A1	84210	-0.34179	0.0373683
	TC13000901.hg.1	RASA3	RAS p21 protein activator 3	22821	-0.342453	0.00550167
	TC11001079.hg.1	CCDC84	coiled-coil domain containing 84	338657	-0.343928	0.000363256
	TC04001249.hg.1	CENPC	centromere protein C	1060	-0.343972	0.0192551
	TC06002284.hg.1	AGPAT4	1-acylglycerol-3-phosphate O-acyltransferase 4	56895	-0.345039	0.00145419
	TC04002414.hg.1	LOC100130872	uncharacterized LOC100130872	100130872	-0.345781	0.000323054
	TC19000878.hg.1	LENG8	leukocyte receptor cluster (LRC) member 8	114823	-0.346031	0.00922475
	TC0X002343.hg.1	IDS	iduronate 2-sulfatase	3423	-0.346241	0.00237409
	TC06000934.hg.1	BRD7P3	bromodomain containing 7 pseudogene 3	23629	-0.346761	0.0156675
	TC0X000609.hg.1	SH2D1A	SH2 domain containing 1A	4068	-0.34708	0.0492461
	TC03001429.hg.1	RASSF1	Ras association (RalGDS/AF-6) domain family member 1	11186	-0.347515	0.000121745
	TC01000755.hg.1	SRSF11	serine/arginine-rich splicing factor 11	9295	-0.347679	0.00528675
	TC20000850.hg.1	CHD6	chromodomain helicase DNA binding protein 6	84181	-0.349568	0.00456967
	TC15001011.hg.1	HERC2P3	hect domain and RLD 2 pseudogene 3	283755	-0.350292	0.00283921
	TC12000873.hg.1	ADAM1A	ADAM metallopeptidase domain 1A, pseudogene	8759	-0.351326	0.0380254
	TC10001070.hg.1	CUBN	cubilin (intrinsic factor-cobalamin receptor)	8029	-0.351354	0.0317427
	TC14000429.hg.1	PCNX	pecanex homolog (Drosophila)	22990	-0.351655	0.0100899
	TC21000261.hg.1	DIP2A	DIP2 disco-interacting protein 2 homolog A (Drosophila)	23181	-0.352865	0.0167352
	TC19001297.hg.1	SUGP2	SURP and G patch domain containing 2	10147	-0.353046	2.23e-05
	TC0X000061.hg.1	OFD1	oral-facial-digital syndrome 1	8481	-0.354425	0.00956672
	TC15000144.hg.1	HERC2P9	hect domain and RLD 2 pseudogene 9	440248	-0.355334	0.00100858
	TC05002135.hg.1	HNRNPH1	heterogeneous nuclear ribonucleoprotein H1 (H)	3187	-0.355411	0.00230591
	TC11001026.hg.1	ZBTB16	zinc finger and BTB domain containing 16	7704	-0.357532	0.00640329
	TC14000086.hg.1	RPGRIP1	retinitis pigmentosa GTPase regulator interacting protein 1	57096	-0.357675	0.00745234
	TC09002898.hg.1	ANKRD20A2	ankyrin repeat domain 20 family, member A2	441430	-0.357946	0.00853895
	TC18000841.hg.1	MPPE1	metallophosphoesterase 1	65258	-0.357989	0.00844205
	TC18000220.hg.1	KIAA1468	KIAA1468	57614	-0.358921	0.0222483
	TC16002103.hg.1	SMG1P2	SMG1 pseudogene 2	440354	-0.359054	0.0388179
	TC06004105.hg.1	FGFR1OP	FGFR1 oncogene partner	11116	-0.359907	0.00231603
	TC0X001156.hg.1	FTX	FTX transcript, XIST regulator (non-protein coding)	100302692	-0.360124	0.0344247
	TC02002451.hg.1	ERMN	ermin, ERM-like protein	57471	-0.360774	0.000718501
	TC15001507.hg.1	RORA	RAR-related orphan receptor A	6095	-0.361275	0.0139179
	TC11001867.hg.1	AHNAK	AHNAK nucleoprotein	79026	-0.362102	0.00968647
	TC01000918.hg.1	AMY2A	amylase, alpha 2A (pancreatic)	279	-0.362325	0.00567659
	TC03000636.hg.1	DIRC2	disrupted in renal carcinoma 2	84925	-0.362437	0.0118062
	TC19000774.hg.1	SIGLEC17P	sialic acid binding Ig-like lectin 17, pseudogene	284367	-0.363174	0.0063471
	TC01000950.hg.1	AMPD2	adenosine monophosphate deaminase 2	271	-0.363592	0.00506712
	TC11000855.hg.1	RAB30-AS1	RAB30 antisense RNA 1 (head to head)	100506233	-0.363665	0.00199336
	TC17000802.hg.1	ARSG	arylsulfatase G	22901	-0.363705	0.00106709
	TC15001058.hg.1	HERC2P2	hect domain and RLD 2 pseudogene 2	400322	-0.363829	0.00209833
	TC04000182.hg.1	TBC1D19	TBC1 domain family, member 19	55296	-0.364206	0.000276614
	TC02000620.hg.1	IL1R1	interleukin 1 receptor, type I	3554	-0.36507	0.0120071
	TC13000126.hg.1	RFXAP	regulatory factor X-associated protein	5994	-0.366031	0.013127
	TC11001444.hg.1	CYP2R1	cytochrome P450, family 2, subfamily R, polypeptide 1	120227	-0.366154	0.00135716
	TC06004075.hg.1	LY6G5B	lymphocyte antigen 6 complex, locus G5B	58496	-0.366561	0.0225936
	TC17001912.hg.1	TNRC6C-AS1	TNRC6C antisense RNA 1	100131096	-0.366636	0.0308143
	TC14001484.hg.1	ATG2B	autophagy related 2B	55102	-0.366797	0.00185893
	TC03001706.hg.1	HSPBAP1	HSPB (heat shock 27kDa) associated protein 1	79663	-0.367379	0.00142129
	TC02002865.hg.1	NMUR1	neuromedin U receptor 1	10316	-0.368991	0.00916903
	TC03000059.hg.1	LINC00852	long intergenic non-protein coding RNA 852	84657	-0.369255	0.00363625
	TC01003479.hg.1	CD247	CD247 molecule	919	-0.369359	0.0469885
	TC16000492.hg.1	GPR114	G protein-coupled receptor 114	221188	-0.370003	0.0216087
	TC01003977.hg.1	PCNXL2	pecanex-like 2 (Drosophila)	80003	-0.370129	0.00127399
	TC08001264.hg.1	ASPH	aspartate beta-hydroxylase	444	-0.370325	0.00211067
	TC03001285.hg.1	EPM2AIP1	EPM2A (laforin) interacting protein 1	9852	-0.371163	0.0200054
	TC17000764.hg.1	TANC2	tetratricopeptide repeat, ankyrin repeat and coiled-coil containing 2	26115	-0.371252	0.000359314
	TC07001206.hg.1	OSBPL3	oxysterol binding protein-like 3	26031	-0.371483	0.00103827
	TC12001879.hg.1	SYCP3	synaptonemal complex protein 3	50511	-0.371489	0.000139526
	TC14001038.hg.1	RALGAPA1	Ral GTPase activating protein, alpha subunit 1 (catalytic)	253959	-0.371719	0.0196803
	TC05002007.hg.1	CCNJL	cyclin J-like	79616	-0.374696	0.00114618
	TC03002083.hg.1	CRYGS	crystallin, gamma S	1427	-0.375374	0.00164145
	TC08000190.hg.1	ADAM28	ADAM metallopeptidase domain 28	10863	-0.376426	0.0440656
	TC20000386.hg.1	ZFAS1	ZNFX1 antisense RNA 1	441951	-0.377234	0.000743181
	TC08001656.hg.1	TMEM71	transmembrane protein 71	137835	-0.380213	0.0496409
	TC16000723.hg.1	LUC7L	LUC7-like (S. cerevisiae)	55692	-0.380713	0.000173641
	TC03001008.hg.1	VPS8	vacuolar protein sorting 8 homolog (S. cerevisiae)	23355	-0.380739	0.0402813
	TC12001188.hg.1	PZP	pregnancy-zone protein	5858	-0.380825	0.00204509
	TC01002095.hg.1	CCNL2	cyclin L2	81669	-0.381396	0.000364643
	TC15001458.hg.1	FAM214A	family with sequence similarity 214, member A	56204	-0.382128	0.00157433
	TC07000475.hg.1	SPDYE5	speedy/RINGO cell cycle regulator family member E5	442590	-0.383728	0.00548259
	TC03003157.hg.1	MBNL1-AS1	MBNL1 antisense RNA 1	401093	-0.384964	0.035461
	TC15001750.hg.1	GOLGA6L10	golgin A6 family-like 10	647042	-0.385849	0.000116612
	TC02004777.hg.1	CLK1	CDC-like kinase 1	1195	-0.386628	0.0440478
	TC15001782.hg.1	GOLGA6L5P	golgin A6 family-like 5, pseudogene	374650	-0.387778	3.71e-05
	TC05002125.hg.1	CLK4	CDC-like kinase 4	57396	-0.388437	0.012063
	TC07000664.hg.1	SPDYE2	speedy/RINGO cell cycle regulator family member E2	441273	-0.388697	0.0461803
	TC16000904.hg.1	XYLT1	xylosyltransferase I	64131	-0.390234	0.00456967
	TC12001189.hg.1	A2MP1	alpha-2-macroglobulin pseudogene 1	3	-0.392242	0.00172687
	TC10000312.hg.1	AGAP9	ArfGAP with GTPase domain, ankyrin repeat and PH domain 9	642517	-0.392317	0.000628892
	TC0X001756.hg.1	LOC100132741	uncharacterized LOC100132741	100132741	-0.392621	0.0291346
	TC12000161.hg.1	LOC101928100	uncharacterized LOC101928100	101928100	-0.39461	0.000255213
	TC18000020.hg.1	DLGAP1-AS1	DLGAP1 antisense RNA 1	649446	-0.394782	0.000970396
	TC06002022.hg.1	FYN	FYN proto-oncogene, Src family tyrosine kinase	2534	-0.395414	0.000474729
	TC17001448.hg.1	FBXL20	F-box and leucine-rich repeat protein 20	84961	-0.396507	0.00111241
	TC16000940.hg.1	RRN3P1	RNA polymerase I transcription factor homolog (S. cerevisiae) pseudogene 1	730092	-0.396824	0.00695367
	TC12001826.hg.1	TMCC3	transmembrane and coiled-coil domain family 3	57458	-0.396976	0.0123046
	TC04000027.hg.1	CRIPAK	cysteine-rich PAK1 inhibitor	285464	-0.397162	0.00344571
	TC15002116.hg.1	GOLGA8T	golgin A8 family, member T	653075	-0.397709	0.0134429
	TC05001110.hg.1	LPCAT1	lysophosphatidylcholine acyltransferase 1	79888	-0.397886	5.62e-05
	TC12001806.hg.1	C12orf79	chromosome 12 open reading frame 79	256021	-0.400026	0.00344868
	TC21000459.hg.1	BRWD1	bromodomain and WD repeat domain containing 1	54014	-0.400034	0.00341074
	TC16002099.hg.1	SLC7A5P2	solute carrier family 7 (amino acid transporter light chain, L system), member 5 pseudogene 2	387254	-0.400755	0.0220399
	TC02002625.hg.1	STAT4	signal transducer and activator of transcription 4	6775	-0.403224	0.0149345
	TC05000770.hg.1	LOC100505658	uncharacterized LOC100505658	100505658	-0.403686	0.0147407
	TC18000278.hg.1	YES1	YES proto-oncogene 1, Src family tyrosine kinase	7525	-0.403809	0.0218548
	TC19001074.hg.1	ARRDC5	arrestin domain containing 5	645432	-0.404463	0.00983145
	TC16002094.hg.1	SMG1P1	SMG1 pseudogene 1	641298	-0.404557	0.0210215
	TC01003408.hg.1	CD244	CD244 molecule, natural killer cell receptor 2B4	51744	-0.404562	0.000443942
	TC06000786.hg.1	C6orf163	chromosome 6 open reading frame 163	206412	-0.40471	0.0467023
	TC14000393.hg.1	PLEKHG3	pleckstrin homology domain containing, family G (with RhoGef domain) member 3	26030	-0.40502	4.16e-06
	TC01000917.hg.1	RNPC3	RNA-binding region (RNP1, RRM) containing 3	55599	-0.405079	0.00826344
	TC12001067.hg.1	ZNF26	zinc finger protein 26	7574	-0.406966	0.000218559
	TC08001282.hg.1	PDE7A	phosphodiesterase 7A	5150	-0.407174	0.0122794
	TC03001255.hg.1	SLC4A7	solute carrier family 4, sodium bicarbonate cotransporter, member 7	9497	-0.407596	0.0125997
	TC01004062.hg.1	AHCTF1	AT hook containing transcription factor 1	25909	-0.407928	0.00209143
	TC06001137.hg.1	SYTL3	synaptotagmin-like 3	94120	-0.408672	0.00191046
	TC01000493.hg.1	MACF1	microtubule-actin crosslinking factor 1	23499	-0.409557	0.00119817
	TC17000794.hg.1	PITPNC1	phosphatidylinositol transfer protein, cytoplasmic 1	26207	-0.410535	0.0314011
	TC05000814.hg.1	ADRB2	adrenoceptor beta 2, surface	154	-0.410879	0.00352652
	TC01001163.hg.1	PPIAL4C	peptidylprolyl isomerase A (cyclophilin A)-like 4C	653598	-0.411262	0.0210857
	TC16001394.hg.1	LINC00921	long intergenic non-protein coding RNA 921	283876	-0.411653	0.0183402
	TC06002280.hg.1	LPAL2	lipoprotein, Lp(a)-like 2, pseudogene	80350	-0.412249	0.000106481
	TC12003285.hg.1	LINC01089	long intergenic non-protein coding RNA 1089	338799	-0.413082	0.000623422
	TC07003333.hg.1	NSUN5P1	NOP2/Sun domain family, member 5 pseudogene 1	155400	-0.416825	0.000148188
	TC02002616.hg.1	ORMDL1	ORMDL sphingolipid biosynthesis regulator 1	94101	-0.417153	0.00330993
	TC09001366.hg.1	PTCH1	patched 1	5727	-0.417248	0.00734503
	TC07003291.hg.1	IFRD1	interferon-related developmental regulator 1	3475	-0.417498	0.0455477
	TC17000539.hg.1	AOC2	amine oxidase, copper containing 2 (retina-specific)	314	-0.418961	0.0362822
	TC16001200.hg.1	DPEP3	dipeptidase 3	64180	-0.419811	0.00297446
	TC14000418.hg.1	SRSF5	serine/arginine-rich splicing factor 5	6430	-0.42246	0.00211426
	TC0X002345.hg.1	LINC00893	long intergenic non-protein coding RNA 893	100131434	-0.42267	0.000168493
	TC16000316.hg.1	RRN3P2	RNA polymerase I transcription factor homolog (S. cerevisiae) pseudogene 2	653390	-0.425158	0.00880064
	TC03003093.hg.1	NPHP3-ACAD11	NPHP3-ACAD11 readthrough (NMD candidate)	100532724	-0.427147	0.00459076
	TC03000253.hg.1	CXCR6	chemokine (C-X-C motif) receptor 6	10663	-0.428771	0.035957
	TC04001152.hg.1	ATP8A1	ATPase, aminophospholipid transporter (APLT), class I, type 8A, member 1	10396	-0.431323	0.00158135
	TC07001579.hg.1	ABCB1	ATP-binding cassette, sub-family B (MDR/TAP), member 1	5243	-0.432467	0.00707215
	TC05002301.hg.1	GUSBP1	glucuronidase, beta pseudogene 1	728411	-0.432816	0.00172632
	TC02001320.hg.1	ANKZF1	ankyrin repeat and zinc finger domain containing 1	55139	-0.43627	1.73e-05
	TC03003341.hg.1	ACAD11	acyl-CoA dehydrogenase family, member 11	84129	-0.437417	0.000196065
	TC20000072.hg.1	PLCB1	phospholipase C, beta 1 (phosphoinositide-specific)	23236	-0.437525	0.0111317
	TC10001228.hg.1	AGAP4	ArfGAP with GTPase domain, ankyrin repeat and PH domain 4	119016	-0.438114	0.00276674
	TC12000159.hg.1	GABARAPL1	GABA(A) receptor-associated protein like 1	23710	-0.439189	0.00947887
	TC16000788.hg.1	ERVK13-1	endogenous retrovirus group K13, member 1	100507321	-0.440293	0.00162355
	TC05000226.hg.1	SNX18	sorting nexin 18	112574	-0.44032	1.86e-07
	TC06002058.hg.1	CEP85L	centrosomal protein 85kDa-like	387119	-0.440986	0.00520998
	TC0X001543.hg.1	GAB3	GRB2-associated binding protein 3	139716	-0.441748	0.000106481
	TC08002604.hg.1	ADHFE1	alcohol dehydrogenase, iron containing, 1	137872	-0.443061	0.000243737
	TC17001799.hg.1	POLG2	polymerase (DNA directed), gamma 2, accessory subunit	11232	-0.443101	0.000588705
	TC11000980.hg.1	ATM	ATM serine/threonine kinase	472	-0.445715	0.0208784
	TC02000353.hg.1	AHSA2	AHA1, activator of heat shock 90kDa protein ATPase homolog 2 (yeast)	130872	-0.446295	0.0019499
	TC13000861.hg.1	ARGLU1	arginine and glutamate rich 1	55082	-0.446716	0.0024088
	TC10001688.hg.1	PDZD8	PDZ domain containing 8	118987	-0.449111	0.000571795
	TC01001688.hg.1	ATP2B4	ATPase, Ca++ transporting, plasma membrane 4	493	-0.45162	0.00506186
	TC07003024.hg.1	STAG3L2	stromal antigen 3-like 2 (pseudogene)	442582	-0.454513	0.000149433
	TC15001241.hg.1	RAD51-AS1	RAD51 antisense RNA 1 (head to head)	100505648	-0.45637	8.06e-05
	TC01002990.hg.1	FAM212B	family with sequence similarity 212, member B	55924	-0.456939	0.0140273
	TC15001191.hg.1	KATNBL1	katanin p80 subunit B-like 1	79768	-0.458766	0.04591
	TC04002612.hg.1	HNRNPDL	heterogeneous nuclear ribonucleoprotein D-like	9987	-0.458905	0.000578656
	TC09000389.hg.1	LOC389765	kinesin family member 27 pseudogene	389765	-0.45901	0.00750079
	TC11001414.hg.1	RNF141	ring finger protein 141	50862	-0.459168	0.000257993
	TC19001804.hg.1	ZNF600	zinc finger protein 600	162966	-0.461416	0.00681035
	TC01003961.hg.1	TTC13	tetratricopeptide repeat domain 13	79573	-0.462518	1.39e-05
	TC20000475.hg.1	C20orf197	chromosome 20 open reading frame 197	284756	-0.46328	0.000183428
	TC10002624.hg.1	CTGLF12P	centaurin, gamma-like family, member 12 pseudogene	414224	-0.463915	0.00317015
	TC07002006.hg.1	ZNF767P	zinc finger family member 767, pseudogene	79970	-0.463926	0.000167818
	TC07002413.hg.1	STAG3L1	stromal antigen 3-like 1 (pseudogene)	54441	-0.46572	8.67e-05
	TC19001167.hg.1	S1PR5	sphingosine-1-phosphate receptor 5	53637	-0.465881	0.0046973
	TC20000429.hg.1	CASS4	Cas scaffolding protein family member 4	57091	-0.467327	0.00677894
	TC07001731.hg.1	SRPK2	SRSF protein kinase 2	6733	-0.467858	2.81e-05
	TC17001059.hg.1	NLRP1	NLR family, pyrin domain containing 1	22861	-0.468647	0.00404198
	TC15002195.hg.1	GABPB1-AS1	GABPB1 antisense RNA 1	100129387	-0.468915	0.0247371
	TC01006384.hg.1	LHX4-AS1	LHX4 antisense RNA 1	100527964	-0.469898	0.00125837
	TC12001277.hg.1	ERP27	endoplasmic reticulum protein 27	121506	-0.470883	0.000947097
	TC19000886.hg.1	NCR1	natural cytotoxicity triggering receptor 1	9437	-0.472591	0.0126653
	TC17001798.hg.1	PECAM1	platelet/endothelial cell adhesion molecule 1	5175	-0.473572	0.00306639
	TC10000340.hg.1	AGAP6	ArfGAP with GTPase domain, ankyrin repeat and PH domain 6	414189	-0.47361	0.0035025
	TC07003013.hg.1	STAG3L3	stromal antigen 3-like 3	442578	-0.474677	8.71e-05
	TC18000077.hg.1	ANKRD20A5P	ankyrin repeat domain 20 family, member A5, pseudogene	440482	-0.480993	0.000360525
	TC13000733.hg.1	KLF12	Kruppel-like factor 12	11278	-0.486886	0.00231301
	TC20000599.hg.1	GPCPD1	glycerophosphocholine phosphodiesterase GDE1 homolog (S. cerevisiae)	56261	-0.486968	0.0317389
	TC10001281.hg.1	AGAP7P	ArfGAP with GTPase domain, ankyrin repeat and PH domain 7, pseudogene	653268	-0.48745	0.00705558
	TC01004040.hg.1	AKT3	v-akt murine thymoma viral oncogene homolog 3	10000	-0.489164	0.00364952
	TC20000611.hg.1	TMX4	thioredoxin-related transmembrane protein 4	56255	-0.492785	3.88e-06
	TC01001691.hg.1	LAX1	lymphocyte transmembrane adaptor 1	54900	-0.494971	0.00445832
	TC0X000388.hg.1	OGT	O-linked N-acetylglucosamine (GlcNAc) transferase	8473	-0.497363	0.000165915
	TC19000034.hg.1	CIRBP	cold inducible RNA binding protein	1153	-0.499713	3.21e-07
	TC16000936.hg.1	LOC100190986	uncharacterized LOC100190986	100190986	-0.500122	0.045734
	TC17000965.hg.1	FAM101B	family with sequence similarity 101, member B	359845	-0.500789	0.0150512
	TC02000904.hg.1	ARHGAP15	Rho GTPase activating protein 15	55843	-0.5023	3.83e-05
	TC17001371.hg.1	SLFN13	schlafen family member 13	146857	-0.504802	8.89e-05
	TC05001910.hg.1	JAKMIP2	janus kinase and microtubule interacting protein 2	9832	-0.505197	0.0362169
	TC02001550.hg.1	LINC00299	long intergenic non-protein coding RNA 299	339789	-0.505565	0.00443175
	TC04002171.hg.1	LOC645513	uncharacterized LOC645513	645513	-0.506508	0.00132256
	TC02000590.hg.1	LOC100506123	uncharacterized LOC100506123	100506123	-0.50719	0.00545933
	TC15002531.hg.1	FLJ10038	uncharacterized protein FLJ10038	55056	-0.50798	0.00313734
	TC01001591.hg.1	C1orf21	chromosome 1 open reading frame 21	81563	-0.513224	0.00449799
	TC06001997.hg.1	SESN1	sestrin 1	27244	-0.517671	0.00743812
	TC10001861.hg.1	LOC399715	uncharacterized LOC399715	399715	-0.519333	0.00183483
	TC09001282.hg.1	KIF27	kinesin family member 27	55582	-0.520739	0.0100899
	TC15001546.hg.1	DAPK2	death-associated protein kinase 2	23604	-0.521308	0.00117355
	TC11002162.hg.1	SYTL2	synaptotagmin-like 2	54843	-0.523974	0.00810763
	TC0X002160.hg.1	ZMAT1	zinc finger, matrin-type 1	84460	-0.524716	0.044842
	TC12001798.hg.1	ATP2B1	ATPase, Ca++ transporting, plasma membrane 1	490	-0.526689	0.000442626
	TC02002740.hg.1	IKZF2	IKAROS family zinc finger 2 (Helios)	22807	-0.527862	0.00214115
	TC17001372.hg.1	SLFN12L	schlafen family member 12-like	100506736	-0.528487	0.000703436
	TC20000469.hg.1	ZNF831	zinc finger protein 831	128611	-0.528489	0.000292205
	TC03000221.hg.1	NKTR	natural killer cell triggering receptor	4820	-0.534261	0.00085394
	TC06001133.hg.1	TMEM181	transmembrane protein 181	57583	-0.539558	0.000243737
	TC03000633.hg.1	PARP15	poly (ADP-ribose) polymerase family, member 15	165631	-0.541801	0.00466999
	TC04001116.hg.1	RELL1	RELT-like 1	768211	-0.544064	0.0020625
	TC12001253.hg.1	MANSC1	MANSC domain containing 1	54682	-0.544992	0.0129323
	TC01001523.hg.1	GPR52	G protein-coupled receptor 52	9293	-0.546043	0.026085
	TC08001620.hg.1	LINC00861	long intergenic non-protein coding RNA 861	100130231	-0.551502	0.0120217
	TC05003050.hg.1	LOC100272216	uncharacterized LOC100272216	100272216	-0.553658	0.0454799
	TC01006247.hg.1	HNRNPU-AS1	HNRNPU antisense RNA 1	284702	-0.555151	0.0495781
	TC11002242.hg.1	PDGFD	platelet derived growth factor D	80310	-0.560617	0.000644668
	TC03000093.hg.1	SH3BP5-AS1	SH3BP5 antisense RNA 1	100505696	-0.560806	0.00275708
	TC09000357.hg.1	CEP78	centrosomal protein 78kDa	84131	-0.562744	0.00625058
	TC03000637.hg.1	LOC100129550	uncharacterized LOC100129550	100129550	-0.565296	0.00437163
	TC03002064.hg.1	ABCC5	ATP-binding cassette, sub-family C (CFTR/MRP), member 5	10057	-0.567294	4.64e-07
	TC12003235.hg.1	LOC374443	C-type lectin domain family 2, member D pseudogene	374443	-0.577147	5.74e-07
	TC06001071.hg.1	STXBP5	syntaxin binding protein 5 (tomosyn)	134957	-0.577205	0.000455705
	TC11003278.hg.1	CREBZF	CREB/ATF bZIP transcription factor	58487	-0.580651	0.000225915
	TC12001236.hg.1	TAS2R50	taste receptor, type 2, member 50	259296	-0.585475	0.0125401
	TC06002238.hg.1	SYNE1	spectrin repeat containing, nuclear envelope 1	23345	-0.588081	0.0426115
	TC04001173.hg.1	TXK	TXK tyrosine kinase	7294	-0.605365	0.0157612
	TC03000141.hg.1	CMC1	C-x(9)-C motif containing 1	152100	-0.622123	3.51e-05
	TC12003236.hg.1	CLEC2D	C-type lectin domain family 2, member D	29121	-0.622482	0.000444419
	TC13000644.hg.1	KIAA0226L	KIAA0226-like	80183	-0.628639	0.000111795
	TC05001459.hg.1	GUSBP9	glucuronidase, beta pseudogene 9	100049076	-0.630372	0.00570793
	TC12001187.hg.1	A2M	alpha-2-macroglobulin	2	-0.630803	3.15e-05
	TC13000354.hg.1	FKSG29	FKSG29	100131561	-0.631579	0.0134046
	TC06002126.hg.1	SGK1	serum/glucocorticoid regulated kinase 1	6446	-0.632007	0.00157868
	TC20000164.hg.1	CST7	cystatin F (leukocystatin)	8530	-0.643914	0.0142838
	TC02000619.hg.1	IL1R2	interleukin 1 receptor, type II	7850	-0.647357	0.0117995
	TC07001714.hg.1	FBXL13	F-box and leucine-rich repeat protein 13	222235	-0.6488	0.0280923
	TC06002103.hg.1	SAMD3	sterile alpha motif domain containing 3	154075	-0.649278	0.0007444
	TC12001238.hg.1	TAS2R19	taste receptor, type 2, member 19	259294	-0.649548	0.0176339
	TC17001830.hg.1	ABCA5	ATP-binding cassette, sub-family A (ABC1), member 5	23461	-0.656679	0.00252663
	TC17001796.hg.1	ERN1.00	endoplasmic reticulum to nucleus signaling 1	2081	-0.657365	3.75e-05
	TC12001239.hg.1	TAS2R31	taste receptor, type 2, member 31	259290	-0.657805	0.000868986
	TC12001186.hg.1	LINC00612	long intergenic non-protein coding RNA 612	253128	-0.658591	1.69e-06
	TC12000142.hg.1	LINC00987	long intergenic non-protein coding RNA 987	100499405	-0.658972	1.87e-05
	TC01001347.hg.1	PYHIN1	pyrin and HIN domain family, member 1	149628	-0.661488	0.00477689
	TC09000253.hg.1	CNTNAP3B	contactin associated protein-like 3B	728577	-0.662718	0.0128706
	TC15002757.hg.1	GOLGA8B	golgin A8 family, member B	440270	-0.688082	1.05e-05
	TC05003447.hg.1	SMA4	glucuronidase, beta pseudogene	11039	-0.690171	0.002639
	TC16001534.hg.1	LOC100507577	uncharacterized LOC100507577	100507577	-0.694705	0.00599258
	TC01005631.hg.1	TGFBR3	transforming growth factor, beta receptor III	7049	-0.696077	0.0215925
	TC01001356.hg.1	FCRL6	Fc receptor-like 6	343413	-0.697391	0.0302932
	TC15002476.hg.1	GOLGA8A	golgin A8 family, member A	23015	-0.707108	5.29e-06
	TC16001201.hg.1	DPEP2	dipeptidase 2	64174	-0.708461	7.3e-05
[truncated: 29 more rows]
