# Supplementary material for: Mapping immune variation and var gene switching in naive hosts infected with Plasmodium falciparum
Source: eLife. 2021 Mar 2;10:e62800. doi: 10.7554/eLife.62800 (PMC7924948; doi:10.7554/eLife.62800)
Supplement: Supplementary file 4. — GO terms are arranged into their functional groups and groups are ordered by size. The leading GO term in the top 12 functional groups is highlighted in red. On sheet 2, we highlight the top 20 GO terms as ordered by p value. [file elife-62800-supp4.xlsx]

## Sheet: inflammatory GO groups
GO term	GO ID	GO term p value (Bonferroni step down corrected)	number of associated genes	associated genes	% of associated genes	GO levels	ontology source	GO group	group p value (Bonferroni step down corrected)
immune system development	GO:0002520	1.544e-05	180	[ACTR1A, AGO1, AGO4, AKIRIN2, AKR1A1, ANGPT1, ANXA2, ANXA2P2, ARSB, ATM, B2M, BAK1, BATF2, BCL3, BCR, BRCA2, BTN2A2, C3, CAMK2G, CAPG, CCR2, CD274, CD40, CD74, CEACAM1, CHMP2B, CLEC5A, CSF1, DHRS7B, DUSP10, EGR1, EIF2AK2, ETV6, FANCA, FAS, FCER1G, FOXP3, G6PD, GAB3, GAS6, GLB1, GON4L, HDAC4, HEATR9, HHEX, HIF1A, HLA-B, HLA-DRB1, HLA-E, HLA-G, HLX, HSPA1A, HSPA1B, HSPD1, IDO1, IFI16, IL12RB1, IL15…	14.2292	[2, 4, 5]	GO biological process	[Group33]	3.58e-17
regulation of hemopoiesis	GO:1903706	0.000128818	97	[AGO1, AGO4, AKR1A1, B2M, BRCA2, BTN2A2, CAMK2G, CAPG, CCR2, CD74, CEACAM1, CSF1, DUSP10, EIF2AK2, FANCA, FOXP3, GAS6, HIF1A, HLA-B, HLA-DRB1, HLA-G, HLX, HSPA1A, HSPA1B, IL12RB1, IL15, IRF1, IRF7, ISG15, ITPKB, JAK3, KAT2A, LDB2, LGALS9, LILRB1, LILRB2, LILRB3, LILRB4, LMO2, MAFB, METTL3, MIA3, MOV10, MYSM1, NEU1, NFAM1, NFE2L2, NFKBIA, P4HTM, PAF1, PEX2, PPARGC1B, PRDM1, PRELID1, PSMA2, PSMA3, …	16.2479	[3, 4, 5, 6, 7, 8]	GO biological process	[Group33]	3.58e-17
negative regulation of leukocyte activation	GO:0002695	0.00268971	45	[ATM, BCR, BTN2A2, CCR2, CD274, CD74, CEACAM1, CST7, DLG5, DUSP3, FOXP3, GLMN, GNRH1, GRN, HLA-DRB1, HLA-F, HLA-G, HLX, IDO1, IL31RA, IRF1, JAK3, LAX1, LDLR, LGALS9, LILRB1, LILRB2, MICA, NEU1, PAK1, PARP3, PDCD1LG2, PRDX1, PTPN6, S1PR4, SMAD7, SOCS1, TBC1D10C, TGFB1, TIGIT, TMEM131L, TNFAIP3, TSPAN32, TYROBP, ZC3H12A]	19.9115	[3, 4, 5, 6]	GO biological process	[Group33]	3.58e-17
hematopoietic or lymphoid organ development	GO:0048534	0.000170623	167	[ACTR1A, AGO1, AGO4, AKIRIN2, AKR1A1, ANGPT1, ANXA2, ANXA2P2, ARSB, ATM, B2M, BAK1, BATF2, BCL3, BCR, BRCA2, BTN2A2, C3, CAMK2G, CAPG, CCR2, CD74, CEACAM1, CHMP2B, CLEC5A, CSF1, DHRS7B, DUSP10, EGR1, EIF2AK2, ETV6, FANCA, FAS, FCER1G, FOXP3, G6PD, GAB3, GAS6, GLB1, GON4L, HDAC4, HEATR9, HHEX, HIF1A, HLA-B, HLA-DRB1, HLA-G, HLX, HSPA1A, HSPA1B, IFI16, IL12RB1, IL15, IL31RA, INTS3, IRF1, IRF7, ISG1…	13.9749	[3, 4, 5, 6]	GO biological process	[Group33]	3.58e-17
regulation of leukocyte activation	GO:0002694	0.0180242	107	[AIF1, AKT1, ATM, BCR, BRCA2, BTN2A2, C12orf4, CAMK2G, CAPG, CCL2, CCR2, CD209, CD274, CD38, CD40, CD74, CEACAM1, CGAS, CST7, DLG5, DUSP10, DUSP3, FANCA, FCER1G, FOXP3, FYN, GALM, GAS6, GLMN, GNRH1, GRB2, GRN, HLA-A, HLA-DMB, HLA-DPA1, HLA-DRB1, HLA-E, HLA-F, HLA-G, HLX, HSPD1, HSPH1, IDO1, IL12RB1, IL15, IL1B, IL31RA, IRF1, IRS2, ITPKB, JAK3, KARS, KAT2A, LAX1, LDLR, LGALS9, LILRB1, LILRB2, LILR…	14.2477	[3, 4, 5]	GO biological process	[Group33]	3.58e-17
negative regulation of cell adhesion	GO:0007162	0.0352209	58	[ABAT, ADAM22, AKT1, ANGPT1, BCKDK, BTN2A2, CD274, CD74, CEACAM1, DLEC1, DLG5, DUSP3, FOXP3, GBP1, GLMN, GNRH1, HLA-DRB1, HLA-G, HLX, IDO1, IL1R1, IL1RN, IRF1, JAK2, JAK3, LAX1, LGALS9, LILRB1, LILRB2, METTL3, MIA3, MUC1, NEU1, PDCD1LG2, PHLDB2, PLXND1, PMAIP1, PPM1F, PRDX1, PRKCD, PTK2, PTK2B, PTPN6, RUNX2, S1PR4, SEMA4C, SH2B3, SMAD7, SOCS1, SRC, TBCD, TCN2, TEP1, TGFB1, TIGIT, TMEM131L, ZC3H12…	16.4773	[3, 4, 5]	GO biological process	[Group33]	3.58e-17
positive regulation of cell-cell adhesion	GO:0022409	0.0146199	58	[ADAM19, AIF1, AKT1, BRD8, BTN2A2, CAPG, CCL2, CCR2, CD209, CD274, CD74, DUSP10, FOXP3, FYN, GALM, GRB2, HLA-A, HLA-DMB, HLA-DPA1, HLA-E, HLA-G, HLX, HSPD1, HSPH1, ICAM1, IL12RB1, IL15, IL1B, ITPKB, JAK3, LGALS9, LILRB1, LILRB2, LILRB4, NOD2, PAK1, PDCD1LG2, PTK2B, PTPN6, PYCARD, RASAL3, RELA, RHBDF2, RIPK2, S1PR4, SMAD7, SOCS1, SRC, STS, TCN2, TDRD7, TGFB1, TNF, TNFSF13B, YES1, ZAP70, ZBTB1, ZBT…	17.0588	[3, 4, 5]	GO biological process	[Group33]	3.58e-17
negative regulation of cell activation	GO:0050866	0.00188446	49	[ABAT, ATM, BCR, BTN2A2, CCR2, CD274, CD74, CEACAM1, CST7, DLG5, DUSP3, FOXP3, GLMN, GNRH1, GRN, HLA-DRB1, HLA-F, HLA-G, HLX, IDO1, IL31RA, IRF1, JAK3, LAX1, LDLR, LGALS9, LILRB1, LILRB2, MICA, NEU1, PAK1, PARP3, PDCD1LG2, PRDX1, PRKCD, PTPN6, S1PR4, SH2B3, SMAD7, SOCS1, TBC1D10C, TGFB1, THBD, TIGIT, TMEM131L, TNFAIP3, TSPAN32, TYROBP, ZC3H12A]	19.4444	[3, 4, 5]	GO biological process	[Group33]	3.58e-17
regulation of leukocyte proliferation	GO:0070663	0.00239225	55	[AIF1, ATM, BTN2A2, CAPG, CCR2, CD209, CD274, CD38, CD40, CD74, CSF1, DLG5, FOXP3, GLMN, GNRH1, HHEX, HLA-A, HLA-DMB, HLA-DPA1, HLA-DRB1, HLA-E, HLA-G, IDO1, IL12RB1, IL15, IL1B, IRF1, IRS2, JAK3, LGALS9, LILRB1, LILRB2, MPRIP, MYD88, NEU1, PAK1, PDCD1LG2, PTPN6, PYCARD, RASAL3, RIPK2, S1PR4, SH3RF1, SOS1, STAT5A, STS, TDRD7, TGFB1, TICAM1, TMEM131L, TNFAIP3, TNFSF13B, TYROBP, ZAP70, ZNF335]	18.2724	[3, 4, 5]	GO biological process	[Group33]	3.58e-17
negative regulation of natural killer cell mediated cytotoxicity	GO:0045953	0.00105022	10	[CEACAM1, HLA-A, HLA-B, HLA-E, HLA-F, HLA-G, LGALS9, LILRB1, MICA, SERPINB9]	58.8235	[4, 5, 6, 7, 8, 9]	GO biological process	[Group33]	3.58e-17
regulation of leukocyte differentiation	GO:1902105	0.00860698	58	[BRCA2, BTN2A2, CAMK2G, CAPG, CCR2, CD74, CEACAM1, CSF1, DUSP10, FANCA, FOXP3, GAS6, HLA-B, HLA-DRB1, HLA-G, HLX, IL12RB1, IL15, IRF1, IRF7, ITPKB, JAK3, KAT2A, LGALS9, LILRB1, LILRB2, LILRB3, LILRB4, MAFB, METTL3, NEU1, NFAM1, PPARGC1B, PRDM1, PRELID1, PTPN6, RB1, RBCK1, RIPK1, RIPK2, RMRP, RORA, S1PR4, SH3RF1, SLAMF8, SMAD7, SOCS1, SOS1, STAT5A, TCTA, TGFB1, TMEM131L, TNF, TYROBP, ZAP70, ZBTB1,…	17.2619	[4, 5, 6, 7, 8, 9]	GO biological process	[Group33]	3.58e-17
leukocyte differentiation	GO:0002521	0.000913531	103	[AKIRIN2, ANXA2, ANXA2P2, ATM, B2M, BAK1, BATF2, BCL3, BRCA2, BTN2A2, C3, CAMK2G, CAPG, CCR2, CD74, CEACAM1, CSF1, DHRS7B, DUSP10, EGR1, EIF2AK2, FANCA, FAS, FCER1G, FOXP3, GAB3, GAS6, GON4L, HDAC4, HHEX, HLA-B, HLA-DRB1, HLA-G, HLX, IFI16, IL12RB1, IL15, IL31RA, IRF1, IRF7, ITFG2, ITPKB, JAK3, KAT2A, KIT, KLF6, LGALS9, LILRB1, LILRB2, LILRB3, LILRB4, LTBR, MAFB, METTL3, MPRIP, MT1A, MT1G, MYH9, …	15.3961	[4, 5, 6, 7, 8]	GO biological process	[Group33]	3.58e-17
positive regulation of cytokine production involved in immune response	GO:0002720	0.00105024	23	[B2M, CD74, DDX58, FCER1G, FFAR2, GALM, HK1, HLA-A, HLA-E, HLA-F, HLA-G, IL1B, IL1R1, IL1RN, KARS, LILRB1, NOD2, PPIP5K1, RHBDF2, RSAD2, TANK, TICAM1, TRIM6]	29.1139	[4, 5, 6, 7]	GO biological process	[Group33]	3.58e-17
hemopoiesis	GO:0030097	0.000151448	161	[AGO1, AGO4, AKIRIN2, AKR1A1, ANGPT1, ANXA2, ANXA2P2, ARSB, ATM, B2M, BAK1, BATF2, BCL3, BCR, BRCA2, BTN2A2, C3, CAMK2G, CAPG, CCR2, CD74, CEACAM1, CHMP2B, CLEC5A, CSF1, DHRS7B, DUSP10, EGR1, EIF2AK2, ETV6, FANCA, FAS, FCER1G, FOXP3, G6PD, GAB3, GAS6, GLB1, GON4L, HDAC4, HEATR9, HHEX, HIF1A, HLA-B, HLA-DRB1, HLA-G, HLX, HSPA1A, HSPA1B, IFI16, IL12RB1, IL15, IL31RA, INTS3, IRF1, IRF7, ISG15, ITFG2…	14.1352	[4, 5, 6, 7]	GO biological process	[Group33]	3.58e-17
negative regulation of lymphocyte activation	GO:0051250	0.0133889	38	[ATM, BTN2A2, CD274, CD74, CEACAM1, DLG5, DUSP3, FOXP3, GLMN, GNRH1, HLA-DRB1, HLA-F, HLA-G, HLX, IDO1, IRF1, JAK3, LAX1, LGALS9, LILRB1, LILRB2, MICA, NEU1, PAK1, PARP3, PDCD1LG2, PRDX1, PTPN6, S1PR4, SMAD7, SOCS1, TBC1D10C, TGFB1, TIGIT, TMEM131L, TNFAIP3, TYROBP, ZC3H12A]	20	[4, 5, 6, 7]	GO biological process	[Group33]	3.58e-17
negative regulation of leukocyte mediated immunity	GO:0002704	0.0288383	18	[BCR, BST2, CCR2, CEACAM1, FOXP3, HLA-A, HLA-B, HLA-E, HLA-F, HLA-G, JAK3, LGALS9, LILRB1, MICA, PARP3, PTPN6, SERPINB9, SMAD7]	28.125	[4, 5, 6]	GO biological process	[Group33]	3.58e-17
positive regulation of leukocyte mediated immunity	GO:0002705	0.0355769	32	[B2M, C3, CD40, DDX58, FCER1G, FOXP3, GALM, HLA-A, HLA-B, HLA-C, HLA-E, HLA-F, HLA-G, HLA-H, HSPD1, IL12RB1, IL1B, IL1R1, IL1RN, MICA, MICB, NOD2, P2RX7, PPIP5K1, RSAD2, SH2D1A, TANK, TGFB1, TICAM1, TNF, TNFSF13, ZBTB1]	20.6452	[4, 5, 6]	GO biological process	[Group33]	3.58e-17
regulation of cytokine production involved in immune response	GO:0002718	1.91228e-05	33	[ANGPT1, B2M, BST2, C3, CCR2, CD74, DDX58, FCER1G, FFAR2, FOXP3, GALM, HK1, HLA-A, HLA-E, HLA-F, HLA-G, IL1B, IL1R1, IL1RN, JAK3, KARS, LILRB1, LPAL2, NOD2, PPIP5K1, RHBDF2, RSAD2, SMAD7, TANK, TGFB1, TICAM1, TNF, TRIM6]	27.5	[4, 5, 6]	GO biological process	[Group33]	3.58e-17
negative regulation of cell-cell adhesion	GO:0022408	0.00766035	43	[ABAT, AKT1, BTN2A2, CD274, CD74, CEACAM1, DLG5, DUSP3, FOXP3, GLMN, GNRH1, HLA-DRB1, HLA-G, HLX, IDO1, IL1R1, IL1RN, IRF1, JAK2, JAK3, LAX1, LGALS9, LILRB1, LILRB2, METTL3, MIA3, NEU1, PDCD1LG2, PPM1F, PRDX1, PRKCD, PTK2, PTK2B, PTPN6, S1PR4, SH2B3, SMAD7, SOCS1, TGFB1, TIGIT, TMEM131L, ZC3H12A, ZNF703]	19.3694	[4, 5, 6]	GO biological process	[Group33]	3.58e-17
regulation of mononuclear cell proliferation	GO:0032944	0.00616407	52	[AIF1, ATM, BTN2A2, CAPG, CCR2, CD209, CD274, CD38, CD40, CD74, CSF1, DLG5, FOXP3, GLMN, GNRH1, HLA-A, HLA-DMB, HLA-DPA1, HLA-DRB1, HLA-E, HLA-G, IDO1, IL12RB1, IL15, IL1B, IRF1, IRS2, JAK3, LGALS9, LILRB1, LILRB2, MPRIP, MYD88, NEU1, PAK1, PDCD1LG2, PTPN6, PYCARD, RASAL3, RIPK2, S1PR4, SH3RF1, SOS1, STS, TDRD7, TGFB1, TICAM1, TMEM131L, TNFSF13B, TYROBP, ZAP70, ZNF335]	18.1185	[4, 5, 6]	GO biological process	[Group33]	3.58e-17
regulation of lymphocyte activation	GO:0051249	0.0204353	93	[AIF1, AKT1, ATM, BRCA2, BTN2A2, CAMK2G, CAPG, CCL2, CCR2, CD209, CD274, CD38, CD40, CD74, CEACAM1, CGAS, DLG5, DUSP10, DUSP3, FANCA, FOXP3, FYN, GALM, GAS6, GLMN, GNRH1, GRB2, HLA-A, HLA-DMB, HLA-DPA1, HLA-DRB1, HLA-E, HLA-F, HLA-G, HLX, HSPD1, HSPH1, IDO1, IL12RB1, IL15, IL1B, IRF1, IRS2, ITPKB, JAK3, KAT2A, LAX1, LGALS9, LILRB1, LILRB2, LILRB4, METTL3, MICA, MPRIP, MYD88, NEU1, NFAM1, NOD2, PA…	14.7152	[4, 5, 6]	GO biological process	[Group33]	3.58e-17
positive regulation of leukocyte cell-cell adhesion	GO:1903039	0.00120243	54	[AIF1, AKT1, BTN2A2, CAPG, CCL2, CCR2, CD209, CD274, CD74, DUSP10, FOXP3, FYN, GALM, GRB2, HLA-A, HLA-DMB, HLA-DPA1, HLA-E, HLA-G, HLX, HSPD1, HSPH1, ICAM1, IL12RB1, IL15, IL1B, ITPKB, JAK3, LGALS9, LILRB1, LILRB2, LILRB4, NOD2, PAK1, PDCD1LG2, PTK2B, PTPN6, PYCARD, RASAL3, RELA, RHBDF2, RIPK2, S1PR4, SOCS1, SRC, STS, TDRD7, TGFB1, TNF, TNFSF13B, YES1, ZAP70, ZBTB1, ZBTB16]	18.8153	[4, 5, 6]	GO biological process	[Group33]	3.58e-17
regulation of leukocyte mediated immunity	GO:0002703	0.00379248	47	[B2M, BCR, BST2, C12orf4, C3, CCR2, CD40, CEACAM1, DDX58, FCER1G, FOXP3, GALM, HLA-A, HLA-B, HLA-C, HLA-E, HLA-F, HLA-G, HLA-H, HSPD1, IL12RB1, IL1B, IL1R1, IL1RN, JAK3, LGALS9, LILRB1, MICA, MICB, MPRIP, NCR1, NOD2, P2RX7, PARP3, PPIP5K1, PTPN6, RSAD2, SERPINB9, SH2D1A, SMAD7, TANK, TGFB1, TICAM1, TNF, TNFSF13, WAS, ZBTB1]	19.3416	[4, 5]	GO biological process	[Group33]	3.58e-17
regulation of interleukin-10 production	GO:0032653	0.00473143	20	[BCL3, CAPG, CD274, FCER1G, FOXP3, GALM, HLA-DRB1, HSPD1, IDO1, JAK3, LGALS9, LILRB1, NOD2, PDCD1LG2, PYCARD, SOS1, STS, TDRD7, TIGIT, TYROBP]	29.4118	[4, 5]	GO biological process	[Group33]	3.58e-17
T cell activation	GO:0042110	9.83428e-08	111	[AIF1, AKT1, B2M, BCL3, BRCA2, BTN2A2, BTN3A1, C3, CAMK2G, CAPG, CCL2, CCR2, CD209, CD274, CD74, CDH26, CEACAM1, CGAS, DLG5, DUSP10, DUSP3, EGR1, ELF4, FANCA, FCER1G, FKBP1A, FOXP3, FYN, GALM, GLMN, GNRH1, GRB2, HLA-A, HLA-DMB, HLA-DPA1, HLA-DRB1, HLA-E, HLA-G, HLX, HSPD1, HSPH1, ICAM1, IDO1, IL12RB1, IL15, IL1B, IRF1, ITPKB, JAK3, KAT2A, KIT, LAX1, LCP1, LGALS9, LILRB1, LILRB2, LILRB4, MAFB, MET…	17.6752	[4, 5]	GO biological process	[Group33]	3.58e-17
lymphocyte proliferation	GO:0046651	0.0086375	62	[AIF1, ATM, BTN2A2, BTN3A1, CAPG, CCR2, CD209, CD274, CD38, CD40, CD74, DLG5, ELF4, FOXP3, FYN, GLMN, GNRH1, HLA-A, HLA-DMB, HLA-DPA1, HLA-DRB1, HLA-E, HLA-G, HSPD1, IDO1, IL12RB1, IL15, IL1B, IRF1, IRS2, JAK3, LGALS9, LILRB1, LILRB2, MPRIP, MYD88, NAPSA, NCSTN, NEU1, P2RX7, PAK1, PDCD1LG2, PRKCD, PSMB10, PTPN6, PYCARD, RASAL3, RIPK2, S1PR4, SH3RF1, SOS1, STS, TBK1, TDRD7, TGFB1, TICAM1, TMEM131L…	16.9399	[4, 5]	GO biological process	[Group33]	3.58e-17
regulation of leukocyte cell-cell adhesion	GO:1903037	0.000414108	70	[AIF1, AKT1, BTN2A2, CAPG, CCL2, CCR2, CD209, CD274, CD74, CEACAM1, DLG5, DUSP10, DUSP3, FOXP3, FYN, GALM, GLMN, GNRH1, GRB2, HLA-A, HLA-DMB, HLA-DPA1, HLA-DRB1, HLA-E, HLA-G, HLX, HSPD1, HSPH1, ICAM1, IDO1, IL12RB1, IL15, IL1B, IRF1, ITPKB, JAK3, LAX1, LGALS9, LILRB1, LILRB2, LILRB4, MIA3, NEU1, NOD2, PAK1, PDCD1LG2, PRDX1, PTK2B, PTPN6, PYCARD, RASAL3, RELA, RHBDF2, RIPK2, S1PR4, SMAD7, SOCS1, …	17.5879	[4, 5]	GO biological process	[Group33]	3.58e-17
T cell differentiation	GO:0030217	0.024092	52	[B2M, BCL3, BRCA2, BTN2A2, C3, CAMK2G, CAPG, CCR2, CD74, DUSP10, EGR1, FANCA, FCER1G, FOXP3, HLA-G, HLX, IL12RB1, IL15, IRF1, ITPKB, JAK3, KAT2A, KIT, LGALS9, LILRB2, LILRB4, MAFB, METTL3, MPRIP, NEU1, NHEJ1, PRDM1, PRELID1, RELB, RIPK2, RORA, RSAD2, RUNX2, S1PR4, SH3RF1, SMAD7, SOCS1, SOS1, SP3, STAT3, TARP, TGFB1, TMEM131L, ZAP70, ZBTB1, ZBTB16, ZC3H12A]	17.3913	[5, 6, 7, 8, 9, 10]	GO biological process	[Group33]	3.58e-17
regulation of lymphocyte differentiation	GO:0045619	0.00881869	40	[BRCA2, BTN2A2, CAMK2G, CAPG, CCR2, CD74, DUSP10, FANCA, FOXP3, GAS6, HLA-G, HLX, IL12RB1, IL15, IRF1, ITPKB, JAK3, KAT2A, LGALS9, LILRB2, LILRB4, METTL3, NEU1, NFAM1, PRDM1, PRELID1, PTPN6, RIPK2, S1PR4, SH3RF1, SLAMF8, SMAD7, SOCS1, SOS1, TGFB1, TMEM131L, ZAP70, ZBTB1, ZBTB16, ZC3H12A]	19.802	[5, 6, 7, 8, 9, 10]	GO biological process	[Group33]	3.58e-17
positive regulation of T cell activation	GO:0050870	0.00404083	50	[AIF1, AKT1, BTN2A2, CAPG, CCL2, CCR2, CD209, CD274, CD74, DUSP10, FOXP3, FYN, GALM, GRB2, HLA-A, HLA-DMB, HLA-DPA1, HLA-E, HLA-G, HLX, HSPD1, HSPH1, IL12RB1, IL15, IL1B, ITPKB, JAK3, LGALS9, LILRB1, LILRB2, LILRB4, NOD2, PAK1, PDCD1LG2, PTK2B, PTPN6, PYCARD, RASAL3, RIPK2, S1PR4, SOCS1, SRC, STS, TDRD7, TGFB1, TNFSF13B, YES1, ZAP70, ZBTB1, ZBTB16]	18.7266	[5, 6, 7, 8]	GO biological process	[Group33]	3.58e-17
positive regulation of lymphocyte mediated immunity	GO:0002708	0.0419841	27	[B2M, C3, CD40, FCER1G, FOXP3, HLA-A, HLA-B, HLA-C, HLA-E, HLA-F, HLA-G, HLA-H, HSPD1, IL12RB1, IL1B, IL1R1, IL1RN, MICA, MICB, P2RX7, RSAD2, SH2D1A, TANK, TGFB1, TNF, TNFSF13, ZBTB1]	22.314	[5, 6, 7]	GO biological process	[Group33]	3.58e-17
positive regulation of adaptive immune response based on somatic recombination of immune receptors built from immunoglobulin superfamily domains	GO:0002824	0.000580975	30	[B2M, C3, CCR2, CD274, CD40, FCER1G, FOXP3, HLA-A, HLA-B, HLA-C, HLA-E, HLA-F, HLA-G, HLA-H, HLX, HSPD1, IL12RB1, IL1B, IL1R1, IL1RN, P2RX7, RIPK2, RSAD2, S1PR4, TANK, TGFB1, TNF, TNFSF13, TNFSF13B, ZBTB1]	25.4237	[5, 6, 7]	GO biological process	[Group33]	3.58e-17
regulation of T cell activation	GO:0050863	4.36358e-05	76	[AIF1, AKT1, BRCA2, BTN2A2, CAMK2G, CAPG, CCL2, CCR2, CD209, CD274, CD74, CEACAM1, CGAS, DLG5, DUSP10, DUSP3, FANCA, FOXP3, FYN, GALM, GLMN, GNRH1, GRB2, HLA-A, HLA-DMB, HLA-DPA1, HLA-DRB1, HLA-E, HLA-G, HLX, HSPD1, HSPH1, IDO1, IL12RB1, IL15, IL1B, IRF1, ITPKB, JAK3, KAT2A, LAX1, LGALS9, LILRB1, LILRB2, LILRB4, METTL3, MPRIP, NEU1, NOD2, PAK1, PDCD1LG2, PRDM1, PRDX1, PRELID1, PTK2B, PTPN6, PYCAR…	18.0952	[5, 6, 7]	GO biological process	[Group33]	3.58e-17
negative regulation of leukocyte cell-cell adhesion	GO:1903038	0.0319318	33	[AKT1, BTN2A2, CD274, CD74, CEACAM1, DLG5, DUSP3, FOXP3, GLMN, GNRH1, HLA-DRB1, HLA-G, HLX, IDO1, IRF1, JAK3, LAX1, LGALS9, LILRB1, LILRB2, MIA3, NEU1, PDCD1LG2, PRDX1, PTK2B, PTPN6, S1PR4, SMAD7, SOCS1, TGFB1, TIGIT, TMEM131L, ZC3H12A]	20.3704	[5, 6, 7]	GO biological process	[Group33]	3.58e-17
regulation of lymphocyte mediated immunity	GO:0002706	0.00382629	38	[B2M, C3, CCR2, CD40, CEACAM1, FCER1G, FOXP3, HLA-A, HLA-B, HLA-C, HLA-E, HLA-F, HLA-G, HLA-H, HSPD1, IL12RB1, IL1B, IL1R1, IL1RN, LGALS9, LILRB1, MICA, MICB, MPRIP, NCR1, P2RX7, PARP3, PTPN6, RSAD2, SERPINB9, SH2D1A, SMAD7, TANK, TGFB1, TNF, TNFSF13, WAS, ZBTB1]	20.9945	[5, 6]	GO biological process	[Group33]	3.58e-17
regulation of adaptive immune response based on somatic recombination of immune receptors built from immunoglobulin superfamily domains	GO:0002822	0.000393215	41	[B2M, C3, CCR2, CD274, CD40, CEACAM1, FCER1G, FOXP3, HLA-A, HLA-B, HLA-C, HLA-E, HLA-F, HLA-G, HLA-H, HLX, HSPD1, IL12RB1, IL1B, IL1R1, IL1RN, JAK3, LILRB1, MPRIP, P2RX7, PAK1, PARP3, PTPN6, RIPK2, RSAD2, S1PR4, SMAD7, TANK, TGFB1, TNF, TNFAIP3, TNFSF13, TNFSF13B, WAS, ZBTB1, ZC3H12A]	21.9251	[5, 6]	GO biological process	[Group33]	3.58e-17
T cell proliferation	GO:0042098	0.00982575	47	[AIF1, BTN2A2, BTN3A1, CAPG, CCR2, CD209, CD274, DLG5, ELF4, FOXP3, FYN, GLMN, GNRH1, HLA-A, HLA-DMB, HLA-DPA1, HLA-DRB1, HLA-E, HLA-G, IDO1, IL12RB1, IL15, IL1B, IRF1, JAK3, LGALS9, LILRB1, LILRB2, MPRIP, NCSTN, NEU1, P2RX7, PDCD1LG2, PSMB10, PTPN6, PYCARD, RASAL3, RIPK2, S1PR4, SH3RF1, SOS1, STS, TDRD7, TGFB1, TMEM131L, TNFSF13B, ZAP70]	18.7251	[5, 6]	GO biological process	[Group33]	3.58e-17
T cell mediated immunity	GO:0002456	0.0203657	30	[B2M, CAPG, CCR2, CEACAM1, CTSB, FOXP3, HLA-A, HLA-B, HLA-C, HLA-E, HLA-F, HLA-G, HLA-H, HSPD1, ICAM1, IL12RB1, IL1B, IL1R1, IL1RN, IL31RA, LILRB1, MICA, MICB, MPRIP, P2RX7, RSAD2, SMAD7, TANK, WAS, ZBTB1]	21.7391	[5]	GO biological process	[Group33]	3.58e-17
regulation of T cell differentiation	GO:0045580	0.00244373	36	[BRCA2, BTN2A2, CAMK2G, CAPG, CCR2, CD74, DUSP10, FANCA, FOXP3, HLA-G, HLX, IL12RB1, IL15, IRF1, ITPKB, JAK3, KAT2A, LGALS9, LILRB2, LILRB4, METTL3, NEU1, PRDM1, PRELID1, RIPK2, S1PR4, SH3RF1, SMAD7, SOCS1, SOS1, TGFB1, TMEM131L, ZAP70, ZBTB1, ZBTB16, ZC3H12A]	21.8182	[6, 7, 8, 9, 10, 11]	GO biological process	[Group33]	3.58e-17
positive regulation of T cell mediated immunity	GO:0002711	0.00200048	18	[B2M, FOXP3, HLA-A, HLA-B, HLA-C, HLA-E, HLA-F, HLA-G, HLA-H, HSPD1, IL12RB1, IL1B, IL1R1, IL1RN, P2RX7, RSAD2, TANK, ZBTB1]	33.3333	[6, 7, 8]	GO biological process	[Group33]	3.58e-17
regulation of T cell mediated immunity	GO:0002709	0.00140879	24	[B2M, CCR2, CEACAM1, FOXP3, HLA-A, HLA-B, HLA-C, HLA-E, HLA-F, HLA-G, HLA-H, HSPD1, IL12RB1, IL1B, IL1R1, IL1RN, LILRB1, MPRIP, P2RX7, RSAD2, SMAD7, TANK, WAS, ZBTB1]	27.907	[6, 7]	GO biological process	[Group33]	3.58e-17
antigen processing and presentation of exogenous peptide antigen via MHC class I, TAP-independent	GO:0002480	0.000440792	8	[B2M, HLA-A, HLA-B, HLA-C, HLA-E, HLA-F, HLA-G, HLA-H]	80	[6]	GO biological process	[Group33]	3.58e-17
positive regulation of regulatory T cell differentiation	GO:0045591	0.00752477	10	[BTN2A2, CAPG, DUSP10, FOXP3, HLA-G, LGALS9, LILRB2, LILRB4, SOCS1, TGFB1]	50	[7, 8, 9, 10, 11, 12, 13]	GO biological process	[Group33]	3.58e-17
regulation of regulatory T cell differentiation	GO:0045589	0.00259867	14	[BRCA2, BTN2A2, CAPG, DUSP10, FANCA, FOXP3, HLA-G, IRF1, KAT2A, LGALS9, LILRB2, LILRB4, SOCS1, TGFB1]	40	[7, 8, 9, 10, 11, 12]	GO biological process	[Group33]	3.58e-17
antigen processing and presentation of endogenous peptide antigen via MHC class I via ER pathway, TAP-independent	GO:0002486	0.000910653	7	[HLA-A, HLA-B, HLA-C, HLA-E, HLA-F, HLA-G, HLA-H]	87.5	[7]	GO biological process	[Group33]	3.58e-17
positive regulation of immune effector process	GO:0002699	0.000612995	52	[APPL2, B2M, C12orf4, C3, CAPG, CCR2, CD244, CD40, CD74, DDX58, DDX60, DHX58, FCER1G, FFAR2, FOXP3, GALM, HK1, HLA-A, HLA-B, HLA-C, HLA-DMB, HLA-E, HLA-F, HLA-G, HLA-H, HLX, HSPD1, IL12RB1, IL1B, IL1R1, IL1RN, KARS, LGALS9, LILRB1, MICA, MICB, NOD2, P2RX7, PPIP5K1, RAPGEF1, RHBDF2, RIPK2, RSAD2, S1PR4, SH2D1A, TANK, TGFB1, TICAM1, TNF, TNFSF13, TRIM6, ZBTB1]	19.697	[3, 4, 5]	GO biological process	[Group32, Group33]	9.3e-16
regulation of production of molecular mediator of immune response	GO:0002700	0.00614237	40	[ANGPT1, B2M, BST2, C3, CCR2, CD244, CD40, CD74, CGAS, DDX58, FCER1G, FFAR2, FOXP3, GALM, HK1, HLA-A, HLA-E, HLA-F, HLA-G, IL1B, IL1R1, IL1RN, JAK3, KARS, LILRB1, LPAL2, NOD2, PAK1, PARP3, PPIP5K1, RHBDF2, RSAD2, SMAD7, TANK, TDRD7, TGFB1, TICAM1, TNF, TNFSF13, TRIM6]	20.202	[3, 4, 5]	GO biological process	[Group32, Group33]	9.3e-16
positive regulation of cytokine secretion	GO:0050715	9.8464e-05	43	[AIF1, AIM2, ANGPT1, C1QTNF3, C5, CASP1, CCM2, CD244, CD274, CLEC5A, CLEC6A, DDX58, FCN1, FFAR2, GALM, GLMN, GSDMD, HK1, IFIH1, IL17RC, IL1B, KARS, LCP1, LGALS9, LRRK2, NBN, NLRP1, NLRP12, NOD2, ORM1, P2RX7, PANX2, PMAIP1, PPIP5K1, PYCARD, RIPK2, RUNX2, SRC, STS, TLR8, TNF, TRIM6, TXNRD1]	22.5131	[4, 5, 6, 7, 8, 9, 10, 11]	GO biological process	[Group32]	9.3e-16
positive regulation of protein secretion	GO:0050714	0.0152697	60	[ABAT, ADRB2, AIF1, AIM2, ANGPT1, C1QTNF3, C5, CASP1, CCM2, CD244, CD274, CD2AP, CD38, CLEC5A, CLEC6A, CSTA, DAPK2, DDX58, DLEC1, FCN1, FFAR2, GALM, GLMN, GSDMD, HCAR2, HIF1A, HK1, HLA-DRB1, HLA-E, IFIH1, IL17RC, IL1B, IRS2, JAK2, KARS, LCP1, LGALS9, LRRK2, NBN, NLRP1, NLRP12, NOD2, NR1H2, ORM1, P2RX7, PANX2, PLA2G6, PMAIP1, PPIP5K1, PYCARD, RIPK2, RUNX2, SRC, STS, TCF7L2, TGFB1, TLR8, TNF, TRIM6…	16.8539	[4, 5, 6, 7, 8, 9, 10]	GO biological process	[Group32]	9.3e-16
positive regulation of interleukin-1 production	GO:0032732	5.57674e-05	25	[AIM2, ANGPT1, CASP1, EGR1, GALM, GSDMD, HK1, HSPB1, IFI16, JAK2, LCP1, LGALS9, NBN, NLRP1, NLRP12, NOD1, NOD2, ORM1, P2RX7, PANX2, PYCARD, RIPK2, STS, TLR8, TYROBP]	31.6456	[4, 5, 6]	GO biological process	[Group32]	9.3e-16
positive regulation of interleukin-8 production	GO:0032757	0.00123783	22	[CD244, DDX58, FCN1, FFAR2, GALM, HSPA1A, HSPA1B, IL1B, LGALS9, LPAL2, MYD88, NOD2, PPIP5K1, PRKD2, PYCARD, RIPK1, STS, TLR5, TLR7, TLR8, TNF, TXNRD1]	29.7297	[4, 5, 6]	GO biological process	[Group32]	9.3e-16
interleukin-1 secretion	GO:0050701	1.43777e-05	27	[AIM2, ANGPT1, CARD16, CARD17, CASP1, GALM, GAS6, GBP5, GSDMD, HK1, IL1R2, LCP1, LGALS9, NBN, NLRP1, NLRP12, NOD2, ORM1, P2RX7, PANX2, PML, PYCARD, RIPK2, STS, TLR8, TNFAIP3, ZC3H12A]	31.7647	[4, 5, 7, 8, 9, 10]	GO biological process	[Group32]	9.3e-16
regulation of interleukin-1 production	GO:0032652	2.75252e-06	37	[ADRB2, AIM2, ANGPT1, CARD16, CARD17, CASP1, CEACAM1, EGR1, ELF4, GALM, GAS6, GSDMD, HK1, HSPB1, IFI16, IL1R2, JAK2, LCP1, LGALS9, NBN, NLRP1, NLRP12, NOD1, NOD2, ORM1, P2RX7, PANX2, PML, PYCARD, RIPK2, S1PR4, STS, TLR8, TNFAIP3, TXNRD1, TYROBP, ZC3H12A]	27.4074	[4, 5]	GO biological process	[Group32]	9.3e-16
regulation of interleukin-6 production	GO:0032675	6.05442e-06	44	[ADRB2, AIF1, AKIRIN2, ANGPT1, C1QTNF3, DDX58, FCER1G, FOXP3, GALM, GAS6, HLA-B, HSPD1, IFIH1, IL17RC, IL1B, IL1R1, IL1RN, LCP1, LGALS9, LILRB2, MAPK13, MYD88, NLRC3, NLRP12, NOD1, NOD2, ORM1, P2RX7, PPIP5K1, PTPN6, PYCARD, RIPK2, SOS1, STAT3, STS, TICAM1, TLR7, TLR8, TNF, TNFAIP3, TXNRD1, TYROBP, ZBTB20, ZC3H12A]	24.1758	[4, 5]	GO biological process	[Group32]	9.3e-16
regulation of interleukin-8 production	GO:0032677	0.00617472	25	[ANXA4, BCL3, CD244, DDX58, FCN1, FFAR2, GALM, HSPA1A, HSPA1B, IL1B, LGALS9, LPAL2, MYD88, NOD2, PPIP5K1, PRKD2, PYCARD, RIPK1, S1PR4, STS, TLR5, TLR7, TLR8, TNF, TXNRD1]	25.2525	[4, 5]	GO biological process	[Group32]	9.3e-16
regulation of tumor necrosis factor superfamily cytokine production	GO:1903555	0.0491363	37	[ADRB2, ANGPT1, BCL3, CCR2, CD274, CYBB, DDX58, FCER1G, FOXP3, GALM, GAS6, HLA-E, HSPB1, IFIH1, JAK2, LCP1, LGALS9, LILRB1, LRRK2, LY96, MYD88, NLRC3, NOD1, NOD2, ORM1, PPIP5K1, PTPN6, PYCARD, RIPK1, RIPK2, STS, TICAM1, TNFAIP3, TYROBP, ZBTB20, ZC3H12A, ZFP36]	19.2708	[4, 5]	GO biological process	[Group32]	9.3e-16
positive regulation of interleukin-1 secretion	GO:0050716	0.00101124	19	[AIM2, ANGPT1, CASP1, GALM, GSDMD, HK1, LCP1, LGALS9, NBN, NLRP1, NLRP12, NOD2, ORM1, P2RX7, PANX2, PYCARD, RIPK2, STS, TLR8]	33.3333	[5, 6, 7, 8, 9, 10, 11, 12]	GO biological process	[Group32]	9.3e-16
positive regulation of tumor necrosis factor production	GO:0032760	0.0283476	26	[ANGPT1, CCR2, CYBB, DDX58, FCER1G, GALM, HLA-E, HSPB1, IFIH1, JAK2, LCP1, LGALS9, LRRK2, LY96, MYD88, NOD1, NOD2, ORM1, PPIP5K1, PYCARD, RIPK1, RIPK2, STS, TICAM1, TYROBP, ZBTB20]	22.807	[5, 6, 7]	GO biological process	[Group32]	9.3e-16
interleukin-1 beta secretion	GO:0050702	0.000109876	24	[AIM2, ANGPT1, CARD16, CARD17, CASP1, GALM, GBP5, GSDMD, HK1, LCP1, LGALS9, NBN, NLRP1, NLRP12, NOD2, ORM1, P2RX7, PML, PYCARD, RIPK2, STS, TLR8, TNFAIP3, ZC3H12A]	31.5789	[5, 6, 8, 9, 10, 11]	GO biological process	[Group32]	9.3e-16
regulation of interleukin-1 beta production	GO:0032651	0.00010935	31	[AIM2, ANGPT1, CARD16, CARD17, CASP1, EGR1, ELF4, GALM, GSDMD, HK1, HSPB1, IFI16, JAK2, LCP1, LGALS9, NBN, NLRP1, NLRP12, NOD1, NOD2, ORM1, P2RX7, PML, PYCARD, RIPK2, STS, TLR8, TNFAIP3, TXNRD1, TYROBP, ZC3H12A]	26.7241	[5, 6]	GO biological process	[Group32]	9.3e-16
positive regulation of cell death	GO:0010942	0.0122204	129	[ADAMTSL4, AKAP13, AKT1, ANXA5, ARHGEF1, ARHGEF11, ARHGEF18, ARL6IP5, ATF3, ATM, BAK1, BCKDK, BRCA2, BRI3, BTG1, C3orf38, CAMK2D, CASP1, CASP10, CASP12, CASP4, CASP5, CCL2, CD274, CD40, CSTA, CTNNA1, CTSB, CTSZ, CYCS, DAPK2, DLEC1, DNAJA1, DNPEP, EGR1, EIF2B5, ELK1, FAS, FGD2, FYN, GADD45B, GLMN, GRN, GSK3A, HCAR2, HDAC4, HLA-G, HM13, HSPD1, HSPE1, IDO1, IFIT2, IP6K2, JAK2, KCNMA1, KMO, LGALS9, L…	13.8116	[3, 4, 5]	GO biological process	[Group31]	5.11e-08
cysteine-type endopeptidase activity involved in apoptotic signaling pathway	GO:0097199	0.0282472	11	[CASP1, CASP10, CASP12, CASP4, CASP5, FAS, JAK2, LGALS9, LYPLA1, PLAUR, TAP1]	40.7407	[4, 5, 6, 10, 11]	GO biological process	[Group31]	5.11e-08
positive regulation of programmed cell death	GO:0043068	0.00722963	122	[ADAMTSL4, AKAP13, AKT1, ANXA5, ARHGEF1, ARHGEF11, ARHGEF18, ARL6IP5, ATF3, ATM, BAK1, BCKDK, BRCA2, BRI3, BTG1, C3orf38, CAMK2D, CASP1, CASP10, CASP12, CASP4, CASP5, CCL2, CD274, CD40, CTNNA1, CTSB, CTSZ, CYCS, DAPK2, DLEC1, DNAJA1, DNPEP, EIF2B5, FAS, FGD2, GADD45B, GLMN, GRN, GSK3A, HCAR2, HDAC4, HLA-G, HM13, HSPD1, HSPE1, IDO1, IFIT2, IP6K2, JAK2, KCNMA1, LGALS9, LILRB1, LPAR1, LRRK2, LTBR, L…	14.1204	[4, 5, 6]	GO biological process	[Group31]	5.11e-08
positive regulation of apoptotic process	GO:0043065	0.0122572	120	[ADAMTSL4, AKAP13, AKT1, ANXA5, ARHGEF1, ARHGEF11, ARHGEF18, ARL6IP5, ATF3, ATM, BAK1, BCKDK, BRCA2, BRI3, BTG1, C3orf38, CAMK2D, CASP1, CASP10, CASP12, CASP4, CASP5, CCL2, CD274, CD40, CTNNA1, CTSB, CTSZ, CYCS, DAPK2, DLEC1, DNAJA1, DNPEP, EIF2B5, FAS, FGD2, GADD45B, GLMN, GRN, GSK3A, HCAR2, HDAC4, HLA-G, HM13, HSPD1, HSPE1, IDO1, IFIT2, IP6K2, JAK2, KCNMA1, LGALS9, LILRB1, LPAR1, LTBR, LYPLA1, …	13.986	[5, 6, 7]	GO biological process	[Group31]	5.11e-08
cysteine-type endopeptidase activity involved in apoptotic process	GO:0097153	0.00345688	54	[AKT1, ARL6IP5, BAK1, BRCA2, CARD16, CASP1, CASP10, CASP12, CASP4, CASP5, CASP7, CTSB, CYCS, DLEC1, DNAJA1, DNPEP, FAS, GAS6, HSPD1, HSPE1, IFI6, JAK2, LAMP3, LGALS9, LYPLA1, NBN, NLRP1, NLRP12, NOD1, PLAUR, PMAIP1, PML, PPM1F, PPOX, PRDX3, PTK2B, PYCARD, RIPK1, RIPK2, SERPINB9, SH3RF1, SOS1, SRC, STS, TANK, TAP1, TNF, TNFSF10, TNFSF13, TPP1, TSC22D3, TXNRD1, WDR35, YWHAE]	18.1818	[5, 9, 10]	GO biological process	[Group31]	5.11e-08
positive regulation of cysteine-type endopeptidase activity involved in apoptotic process	GO:0043280	0.00274907	38	[ARL6IP5, BAK1, BRCA2, CASP1, CASP10, CASP12, CASP4, CASP5, CTSB, CYCS, DLEC1, DNPEP, FAS, HSPD1, HSPE1, JAK2, LGALS9, LYPLA1, NBN, NLRP1, NLRP12, NOD1, PMAIP1, PML, PPM1F, PYCARD, RIPK1, RIPK2, STS, TANK, TAP1, TNF, TNFSF10, TNFSF13, TPP1, TSC22D3, TXNRD1, WDR35]	21.4689	[6, 7, 8, 9, 10, 11, 12]	GO biological process	[Group31]	5.11e-08
regulation of endopeptidase activity	GO:0052548	0.0117903	83	[A2M, AIM2, AKIRIN2, AKT1, APPL2, ARL6IP5, ASPH, BAK1, BCKDK, BRCA2, BST2, C3, C5, CARD16, CARD17, CASP1, CASP10, CASP12, CASP4, CASP5, CD68, CST7, CSTA, CTSB, CYCS, DLEC1, DNAJA1, DNPEP, ELF4, EXOSC7, FAS, FYN, GAS6, HSPD1, HSPE1, IFI16, IFI6, JAK2, LAMP3, LGALS9, LYPLA1, NBN, NLRP1, NLRP12, NOD1, PLAUR, PMAIP1, PML, PPM1F, PPOX, PRDX3, PRELID1, PSMA3, PSMB8, PSMB9, PSME1, PSME2, PTK2B, PTP4A3, …	15.342	[6, 7, 8, 9]	GO biological process	[Group31]	5.11e-08
activation of cysteine-type endopeptidase activity involved in apoptotic process	GO:0006919	0.00216514	30	[BAK1, CASP1, CASP10, CASP12, CASP4, CASP5, CTSB, CYCS, DLEC1, DNPEP, FAS, HSPD1, HSPE1, JAK2, LYPLA1, NLRP1, NLRP12, NOD1, PMAIP1, PML, PYCARD, RIPK1, RIPK2, STS, TANK, TAP1, TNF, TNFSF10, TNFSF13, TXNRD1]	24	[7, 8, 9, 10, 11, 12, 13]	GO biological process	[Group31]	5.11e-08
regulation of cysteine-type endopeptidase activity	GO:2000116	0.000324803	60	[AIM2, AKT1, ARL6IP5, ASPH, BAK1, BRCA2, CARD16, CASP1, CASP10, CASP12, CASP4, CASP5, CST7, CTSB, CYCS, DLEC1, DNAJA1, DNPEP, ELF4, FAS, FYN, GAS6, HSPD1, HSPE1, IFI16, IFI6, JAK2, LAMP3, LGALS9, LYPLA1, NBN, NLRP1, NLRP12, NOD1, PLAUR, PMAIP1, PML, PPM1F, PPOX, PRDX3, PSMB9, PTK2B, PYCARD, RIPK1, RIPK2, SERPINB9, SH3RF1, SOS1, SRC, STS, TANK, TAP1, TNF, TNFSF10, TNFSF13, TPP1, TSC22D3, TXNRD1, W…	18.8088	[7, 8, 9, 10]	GO biological process	[Group31]	5.11e-08
cysteine-type peptidase activity	GO:0008234	0.00530873	86	[AIM2, AKT1, ANKZF1, ARL6IP5, ASPH, BAK1, BCKDK, BRCA2, CAPN1, CAPNS2, CARD16, CARD17, CASP1, CASP10, CASP12, CASP4, CASP5, CASP7, CST7, CSTA, CTSB, CTSK, CTSL, CTSZ, CYCS, DESI1, DLEC1, DNAJA1, DNPEP, ELF4, EXOSC7, FAS, FYN, GAS6, HSPD1, HSPE1, IFI16, IFI6, JAK2, LAMP3, LGALS9, LYPLA1, MYSM1, NBN, NLRP1, NLRP12, NOD1, OTUD3, OTUD4, PDIA3, PLAUR, PMAIP1, PML, PPM1F, PPOX, PRDX3, PSMB9, PTK2B, PYC…	15.4955	[7, 8]	GO biological process	[Group31]	5.11e-08
cysteine-type endopeptidase activity	GO:0004197	0.0208248	71	[AIM2, AKT1, ARL6IP5, ASPH, BAK1, BRCA2, CAPN1, CAPNS2, CARD16, CARD17, CASP1, CASP10, CASP12, CASP4, CASP5, CASP7, CST7, CTSB, CTSK, CTSL, CTSZ, CYCS, DLEC1, DNAJA1, DNPEP, ELF4, FAS, FYN, GAS6, HSPD1, HSPE1, IFI16, IFI6, JAK2, LAMP3, LGALS9, LYPLA1, NBN, NLRP1, NLRP12, NOD1, PDIA3, PLAUR, PMAIP1, PML, PPM1F, PPOX, PRDX3, PSMB9, PTK2B, PYCARD, RIPK1, RIPK2, SERPINB9, SH3RF1, SOS1, SRC, STS, TANK…	15.8837	[8, 9]	GO biological process	[Group31]	5.11e-08
activation of immune response	GO:0002253	3.88368e-07	150	[A2M, ACTR3, ADRB2, AIM2, ALPK1, APPL2, BMX, BTN2A2, BTN3A1, C1QB, C2, C3, C3AR1, C5, CAPG, CD209, CD247, CD38, CD59, CEACAM1, CFP, CGAS, CLEC6A, CTSB, CTSK, CTSL, CUL1, CXCL10, DDX58, DDX60, DHX58, DUSP3, EIF2B5, ELMO2, EPG5, FCER1G, FCGR1A, FCGR1B, FCGR1CP, FCN1, FCN2, FFAR2, FOXP3, FYB1, FYN, GALM, GBP1, GPR33, GRB2, HLA-DPA1, HLA-DQB1, HLA-DQB2, HLA-DRA, HLA-DRB1, HSP90AA1, HSP90AB1, HSPA1A, …	15.6576	[2, 4, 5, 6]	GO biological process	[Group30]	9.14e-26
immune response-activating signal transduction	GO:0002757	9.01274e-06	131	[ACTR3, ADRB2, ALPK1, APPL2, BMX, BTN2A2, BTN3A1, C3AR1, CD209, CD247, CD38, CEACAM1, CLEC6A, CTSB, CTSK, CTSL, CUL1, DDX58, DDX60, DHX58, DUSP3, EIF2B5, ELMO2, EPG5, FCER1G, FCGR1A, FCGR1B, FCGR1CP, FCN1, FFAR2, FOXP3, FYB1, FYN, GALM, GBP1, GPR33, GRB2, HLA-DPA1, HLA-DQB1, HLA-DQB2, HLA-DRA, HLA-DRB1, HSP90AA1, HSP90AB1, HSPA1A, HSPA1B, HSPD1, IFIH1, IMMP2L, IRAK2, IRF1, IRF7, KLHL6, LAT2, LCP2…	15.5952	[3, 4, 5, 6, 7]	GO biological process	[Group30]	9.14e-26
immune response-regulating signaling pathway	GO:0002764	1.04699e-06	139	[ACTR3, ADRB2, ALPK1, APPL2, BMX, BTN2A2, BTN3A1, C3AR1, CD209, CD247, CD38, CD40, CEACAM1, CLEC6A, CTSB, CTSK, CTSL, CUL1, DDX58, DDX60, DHX58, DUSP3, EIF2B5, ELMO2, EPG5, FCER1G, FCGR1A, FCGR1B, FCGR1CP, FCN1, FFAR2, FOXP3, FYB1, FYN, GALM, GBP1, GPR33, GRB2, HLA-DPA1, HLA-DQB1, HLA-DQB2, HLA-DRA, HLA-DRB1, HLA-G, HSP90AA1, HSP90AB1, HSPA1A, HSPA1B, HSPD1, IFIH1, IMMP2L, IRAK2, IRF1, IRF7, KIT,…	15.7955	[3, 4, 5]	GO biological process	[Group30]	9.14e-26
positive regulation of immune response	GO:0050778	1.02783e-10	188	[A2M, ACTR3, ADRB2, AIM2, ALPK1, APPL2, B2M, BMX, BTN2A2, BTN3A1, C1QB, C2, C3, C3AR1, C5, CAPG, CCR2, CD209, CD247, CD274, CD38, CD40, CD59, CD74, CEACAM1, CFP, CGAS, CLEC6A, CTSB, CTSK, CTSL, CUL1, CXCL10, DDX58, DDX60, DHX58, DUSP3, EIF2B5, ELMO2, EPG5, FCER1G, FCGR1A, FCGR1B, FCGR1CP, FCN1, FCN2, FFAR2, FOXP3, FYB1, FYN, GALM, GBP1, GBP5, GPR33, GRB2, HK1, HLA-A, HLA-B, HLA-C, HLA-DMB, HLA-DP…	16.0821	[3, 4, 5]	GO biological process	[Group30, Group32]	9.14e-26
positive regulation of cytokine production	GO:0001819	5.37209e-12	118	[AIF1, AIM2, AKIRIN2, ANGPT1, B2M, BCL3, C1QTNF3, C3, C3AR1, C5, CAPG, CASP1, CCM2, CCR2, CD244, CD274, CD40, CD74, CGAS, CISH, CLEC5A, CLEC6A, CYBB, DDX58, DDX60, DHX58, EGR1, EIF2AK2, FCER1G, FCN1, FFAR2, FOXP3, GALM, GBP5, GLMN, GSDMD, HIF1A, HK1, HLA-A, HLA-DPA1, HLA-E, HLA-F, HLA-G, HSPA1A, HSPA1B, HSPB1, HSPD1, IDO1, IFI16, IFIH1, IL12RB1, IL15, IL17RC, IL1B, IL1R1, IL1RN, IRF1, IRF7, JAK2,…	19.8319	[3, 4, 5]	GO biological process	[Group30, Group32, Group33]	9.14e-26
positive regulation of innate immune response	GO:0045089	3.43147e-08	95	[ADRB2, AIM2, ALPK1, APPL2, CD209, CGAS, CLEC6A, CTSB, CTSK, CTSL, CUL1, DDX58, DDX60, DHX58, EPG5, FCER1G, FCN1, FFAR2, FYN, GALM, GBP5, HLA-E, HLA-F, HLA-G, HSP90AA1, HSPA1A, HSPA1B, HSPD1, IFI16, IFIH1, IRAK2, IRF1, IRF7, LY96, MICA, MICB, MUC1, MYD88, NFKB1, NFKBIA, NLRC5, NLRP6, NOD1, NOD2, NRAS, OTUD4, PAK1, PARP9, PHF11, PIK3AP1, PLSCR1, PPIP5K1, PRKCD, PSMA2, PSMA3, PSMA4, PSMA5, PSMA6, P…	19	[4, 5, 6, 7]	GO biological process	[Group30]	9.14e-26
immune response-regulating cell surface receptor signaling pathway	GO:0002768	0.0110114	97	[ACTR3, APPL2, BMX, BTN2A2, BTN3A1, C3AR1, CD209, CD247, CD38, CD40, CEACAM1, CLEC6A, CUL1, DUSP3, EIF2B5, ELMO2, FCER1G, FCGR1A, FCGR1B, FCGR1CP, FCN1, FFAR2, FOXP3, FYB1, FYN, GBP1, GPR33, GRB2, HLA-DPA1, HLA-DQB1, HLA-DQB2, HLA-DRA, HLA-DRB1, HLA-G, HSP90AA1, HSP90AB1, IMMP2L, KIT, KLHL6, LAT2, LCP2, LILRB1, LILRB2, LILRB4, LIMK1, MAPK1, MICB, MUC1, NAPSA, NFAM1, NFATC3, NFKB1, NRAS, OSCAR, PA…	14.8092	[4, 5, 6]	GO biological process	[Group30]	9.14e-26
regulation of innate immune response	GO:0045088	2.54633e-14	122	[A2M, ADRB2, AIM2, ALPK1, APPL2, CD209, CEACAM1, CGAS, CLEC6A, CTSB, CTSK, CTSL, CUL1, DDX58, DDX60, DHX58, DUSP10, EPG5, FCER1G, FCN1, FFAR2, FYN, GALM, GBP5, GRN, HLA-A, HLA-B, HLA-E, HLA-F, HLA-G, HSP90AA1, HSP90AB1, HSPA1A, HSPA1B, HSPD1, IFI16, IFIH1, IRAK2, IRF1, IRF7, JAK1, JAK2, LGALS9, LILRB1, LY96, MICA, MICB, MUC1, MYD88, NCR1, NFKB1, NFKBIA, NLRC3, NLRC5, NLRP6, NMI, NOD1, NOD2, NR1H2…	20.9262	[4, 5, 6]	GO biological process	[Group30]	9.14e-26
pattern recognition receptor signaling pathway	GO:0002221	0.00550155	49	[ADRB2, ALPK1, APPL2, CTSB, CTSK, CTSL, DDX58, DDX60, DHX58, EPG5, FCN1, FFAR2, GALM, HSP90AA1, HSPA1A, HSPA1B, HSPD1, IFIH1, IRAK2, IRF1, IRF7, LY96, MYD88, NFKBIA, NLRP6, NOD1, NOD2, OTUD4, PHF11, PIK3AP1, RELA, RIPK1, RIPK2, RSAD2, RTN4, TANK, TBK1, TICAM1, TIFA, TLR5, TLR7, TLR8, TMED7-TICAM2, TNFAIP3, TRAF3, TRIM5, TSC22D3, UNC93B1, WDFY1]	18.7023	[5, 6, 7, 8, 9, 10]	GO biological process	[Group30]	9.14e-26
T cell receptor signaling pathway	GO:0050852	0.0149071	51	[BTN2A2, BTN3A1, CD247, CEACAM1, CUL1, DUSP3, EIF2B5, FOXP3, FYB1, FYN, GBP1, HLA-DPA1, HLA-DQB1, HLA-DQB2, HLA-DRA, HLA-DRB1, IMMP2L, LCP2, LILRB4, MAPK1, NFKB1, PAK1, PDE4B, PDE4D, PRDX1, PRKD2, PSMA2, PSMA3, PSMA4, PSMA5, PSMA6, PSMB10, PSMB2, PSMB3, PSMB8, PSMB9, PSME1, PSME2, PTPN6, PVRIG, RBCK1, RELA, RHBDF2, RIPK2, SYTL2, TARP, TNFRSF1A, TXK, WAS, ZAP70, ZC3H12A]	17.8322	[6, 7, 8, 9, 10]	GO biological process	[Group30]	9.14e-26
positive regulation of signal transduction	GO:0009967	0.00848811	255	[ABAT, ADRB2, AGAP2, AGO1, AKAP13, AKR1A1, AKT1, AKT3, ALPK1, ANGPT1, APOL2, APOL3, APPL2, ARHGAP4, ARL6IP5, ATF3, ATM, ATP6V1C1, BAK1, BRD8, BRI3, BST2, C3, C5, CALR, CARD16, CASP1, CASP10, CASP4, CCL2, CCM2, CD40, CD63, CD74, CDK5RAP3, CGAS, CHD6, CLEC6A, CSF1, CST7, CTNNA1, CTSB, CUL9, DAPK2, DDX60, DHX58, DLG5, DPEP2, DSTYK, DUSP5, EGR2, EIF2AK2, ERCC6, F2RL2, FAM53B, FAS, FGD2, FKBP1A, FYN, …	12.2361	[3, 4, 5, 6]	GO biological process	[Group29]	8.99e-10
signal transduction by protein phosphorylation	GO:0023014	0.0428446	161	[ADRB2, AIDA, AKAP13, AKT1, ANGPT1, ARL6IP5, ATF3, BTN2A2, C5, CCL2, CCM2, CD40, CD74, CDK5RAP3, CEACAM1, CSF2RB, CST7, CTSB, CUL1, CUL9, DNAJA1, DSTYK, DTNBP1, DUSP10, DUSP28, DUSP3, DUSP5, EIF2AK2, ERCC6, FAS, FGD2, FYN, GADD45B, GALM, GAS6, GBP1, GH1, GLIPR2, GRB2, HLA-DRB1, HSPA8, ICAM1, IL1B, IL1R1, IL1RN, IL2RG, IL31RA, ILK, IRAK2, IRS1, IRS2, ITPKB, JAK1, JAK2, JAK3, KARS, KIT, KLF6, LAX1,…	12.9006	[3, 4, 5, 7, 8]	GO biological process	[Group29]	8.99e-10
positive regulation of cell communication	GO:0010647	0.0165091	274	[ABAT, ADRB2, AGAP2, AGO1, AKAP13, AKR1A1, AKT1, AKT3, ALPK1, ANGPT1, APOL2, APOL3, APPL2, ARHGAP4, ARL6IP5, ATF3, ATM, ATP6V1C1, BAK1, BRD8, BRI3, BST2, C1QTNF3, C3, C5, CALR, CARD16, CASP1, CASP10, CASP4, CCL2, CCM2, CCR2, CD38, CD40, CD63, CD74, CDK5RAP3, CGAS, CHD6, CLEC6A, CSF1, CST7, CSTA, CTNNA1, CTSB, CUBN, CUL9, DAPK2, DDX60, DHX58, DLEC1, DLG5, DPEP2, DSTYK, DTNBP1, DUSP5, EGR2, EIF2AK2…	11.9912	[3, 4, 5]	GO biological process	[Group29]	8.99e-10
intracellular signal transduction	GO:0035556	1.21525e-06	421	[A2M, ADGRE5, ADGRG5, ADRB2, AGAP2, AGO1, AIDA, AIF1, AKAP13, AKAP5, AKR1A1, AKT1, AKT3, ALPK1, ANGPT1, APOL2, APOL3, ARHGAP15, ARHGAP17, ARHGAP4, ARHGEF1, ARHGEF11, ARHGEF18, ARHGEF40, ARL6IP5, ASB1, ATF3, ATM, ATP2A2, ATP2B4, BAK1, BCL3, BCR, BMX, BRCA2, BRD1, BRD7P3, BST2, BTN2A2, C1QTNF3, C5, CALR, CAMK2D, CAMK2G, CARD16, CASP1, CASP10, CASP4, CASTOR3, CCDC88C, CCL2, CCM2, CCR2, CCRL2, CD209,…	12.2419	[3, 4, 5]	GO biological process	[Group29]	8.99e-10
ATP binding	GO:0005524	0.000143139	234	[ABCA2, ABCA5, ABCB1, ABCC10, ABCC5, ABCD1, ABCD4, ACSL4, ACSL5, ACTA2, ACTR1A, ACTR3, AK3, AKT1, AKT3, ALPK1, APOBEC3B, APOBEC3F, ATM, ATP10D, ATP2A2, ATP2A3, ATP2B1, ATP2B4, ATP8A1, ATP9B, BANF1, BCKDK, BCR, BCS1L, BMX, BRI3, CAMK2D, CAMK2G, CARS2, CCT5, CDC42BPB, CERK, CGAS, CHD1, CHD1L, CHD3, CHD6, CIITA, CLCN5, CLCN7, CLK1, CLK4, CLPB, CMPK2, CNNM2, CUL9, CXCL9, DALRD3, DAPK2, DDX17, DDX58, …	13.0653	[3, 5, 6, 7, 8]	GO molecular function	[Group29]	8.99e-10
MAPK cascade	GO:0000165	0.0494449	159	[ADRB2, AIDA, AKAP13, AKT1, ANGPT1, ARL6IP5, ATF3, BTN2A2, C5, CCL2, CCM2, CD40, CD74, CDK5RAP3, CEACAM1, CSF2RB, CST7, CTSB, CUL1, CUL9, DNAJA1, DSTYK, DTNBP1, DUSP10, DUSP28, DUSP3, DUSP5, EIF2AK2, ERCC6, FAS, FGD2, FYN, GADD45B, GALM, GAS6, GBP1, GH1, GLIPR2, GRB2, HLA-DRB1, HSPA8, ICAM1, IL1B, IL1R1, IL1RN, IL2RG, IL31RA, ILK, IRAK2, IRS1, IRS2, ITPKB, JAK1, JAK2, JAK3, KARS, KIT, KLF6, LAX1,…	12.8745	[4, 5, 6, 8, 9]	GO biological process	[Group29]	8.99e-10
stress-activated protein kinase signaling cascade	GO:0031098	0.00499171	70	[AIDA, AKR1A1, AKT1, ARL6IP5, CCDC88C, CCM2, CST7, CUL1, DNAJA1, DTNBP1, DUSP10, DUSP3, EIF2AK2, ERCC6, FAS, FGD2, FYN, GADD45B, GALM, IL1B, IL1R1, IL1RN, IRAK2, KARS, LGALS9, LTBR, LYPLA1, MAP3K11, MAP3K12, MAPK1, MAPK13, MAPK8IP3, MLKL, MSTO1, MYD88, NCF1, NFKB1, NOD1, NOD2, PAK1, PANK2, PLCB1, PRDX1, PTK2B, PTPN1, PTPN6, PYCARD, RAPGEF1, RELL1, RIPK1, RIPK2, RORA, SEMA4C, SH2D3C, SH3RF1, SLK, …	16.5877	[4, 5, 6]	GO biological process	[Group29]	8.99e-10
purine ribonucleotide binding	GO:0032555	0.000137227	289	[ABCA2, ABCA5, ABCB1, ABCC10, ABCC5, ABCD1, ABCD4, ACBD6, ACOT7, ACSL4, ACSL5, ACTA2, ACTR1A, ACTR3, AGAP1, AGAP2, AK3, AKT1, AKT3, ALPK1, APOBEC3B, APOBEC3F, ARF3, ARL2-SNX15, ARL8A, ATM, ATP10D, ATP2A2, ATP2A3, ATP2B1, ATP2B4, ATP8A1, ATP9B, BANF1, BCKDK, BCR, BCS1L, BMX, BRI3, CAMK2D, CAMK2G, CARS2, CCT5, CDC42BPB, CERK, CGAS, CHD1, CHD1L, CHD3, CHD6, CIITA, CLCN5, CLCN7, CLK1, CLK4, CLPB, CMP…	12.5598	[4, 5, 6]	GO molecular function	[Group29]	8.99e-10
regulation of intracellular signal transduction	GO:1902531	0.0298632	274	[A2M, ADRB2, AGAP2, AGO1, AIDA, AKAP13, AKAP5, AKT1, AKT3, ALPK1, ANGPT1, APOL2, APOL3, ARHGAP15, ARHGAP17, ARHGAP4, ARHGEF1, ARHGEF11, ARHGEF18, ARHGEF40, ARL6IP5, ATF3, ATM, ATP2B4, BCL3, BCR, BRD1, BRD7P3, BST2, BTN2A2, C1QTNF3, C5, CALR, CAMK2D, CARD16, CASP1, CASP10, CASTOR3, CCL2, CCM2, CD2AP, CD40, CD74, CDC42SE1, CDK5RAP3, CEACAM1, CGAS, CHD3, CHD6, CLEC6A, CSF1, CST7, CSTA, CUL9, CYB5R3,…	11.8975	[4, 5, 6]	GO biological process	[Group29]	8.99e-10
regulation of protein metabolic process	GO:0051246	0.0130451	393	[A2M, ABCA2, ACTR1A, ADAR, ADRB2, AGAP2, AGO1, AGO4, AIDA, AIF1, AIM2, AKAP13, AKAP8L, AKIRIN2, AKT1, ANGPT1, ANKLE2, ANXA2, ANXA2P2, APPL2, ARL6IP5, ASB1, ASPH, ATF3, ATM, ATP2B4, BAK1, BCKDK, BCL3, BRCA2, BRD7P3, BRI3, BST2, BTN2A2, C3, C5, CALR, CAMK2D, CARD16, CARD17, CASP1, CASP10, CASP12, CASP4, CASP5, CASS4, CCDC88C, CCL2, CCM2, CCNG2, CCNJL, CCNK, CCNL2, CCR2, CD40, CD68, CD74, CDK5RAP3, …	11.4311	[4, 5]	GO biological process	[Group29, Group31]	8.99e-10
regulation of stress-activated MAPK cascade	GO:0032872	0.00605233	57	[AIDA, AKT1, ARL6IP5, CST7, DNAJA1, DTNBP1, DUSP10, DUSP3, EIF2AK2, ERCC6, FAS, FGD2, GADD45B, GALM, IL1B, IL1R1, IL1RN, KARS, LTBR, LYPLA1, MAP3K11, MAP3K12, MAPK1, MAPK8IP3, MLKL, MSTO1, MYD88, NCF1, NOD1, NOD2, PAK1, PANK2, PLCB1, PRDX1, PTK2B, PTPN1, PTPN6, PYCARD, RAPGEF1, RELL1, RIPK1, RIPK2, RORA, SEMA4C, SH3RF1, SOS1, STK3, STS, TANK, TAP1, TDRD7, TIMELESS, TNF, TNIK, ULK4, YWHAE, ZC3H12A]	17.5385	[5, 6, 7, 8, 9, 10, 11]	GO biological process	[Group29]	8.99e-10
stress-activated MAPK cascade	GO:0051403	0.00649537	65	[AIDA, AKT1, ARL6IP5, CCM2, CST7, CUL1, DNAJA1, DTNBP1, DUSP10, DUSP3, EIF2AK2, ERCC6, FAS, FGD2, GADD45B, GALM, IL1B, IL1R1, IL1RN, IRAK2, KARS, LGALS9, LTBR, LYPLA1, MAP3K11, MAP3K12, MAPK1, MAPK13, MAPK8IP3, MLKL, MSTO1, MYD88, NCF1, NFKB1, NOD1, NOD2, PAK1, PANK2, PLCB1, PRDX1, PTK2B, PTPN1, PTPN6, PYCARD, RAPGEF1, RELL1, RIPK1, RIPK2, RORA, SEMA4C, SH2D3C, SH3RF1, SOS1, STK3, STS, TANK, TAP1…	16.8394	[5, 6, 7, 9, 10]	GO biological process	[Group29]	8.99e-10
adenyl ribonucleotide binding	GO:0032559	0.00033124	241	[ABCA2, ABCA5, ABCB1, ABCC10, ABCC5, ABCD1, ABCD4, ACBD6, ACOT7, ACSL4, ACSL5, ACTA2, ACTR1A, ACTR3, AK3, AKT1, AKT3, ALPK1, APOBEC3B, APOBEC3F, ATM, ATP10D, ATP2A2, ATP2A3, ATP2B1, ATP2B4, ATP8A1, ATP9B, BANF1, BCKDK, BCR, BCS1L, BMX, BRI3, CAMK2D, CAMK2G, CARS2, CCT5, CDC42BPB, CERK, CGAS, CHD1, CHD1L, CHD3, CHD6, CIITA, CLCN5, CLCN7, CLK1, CLK4, CLPB, CMPK2, CNNM2, CUL9, CXCL9, CYB5R3, DALRD3,…	12.8533	[5, 6, 7]	GO molecular function	[Group29]	8.99e-10
regulation of proteolysis	GO:0030162	0.0165095	126	[A2M, AIM2, AKIRIN2, AKT1, ANXA2, ANXA2P2, APPL2, ARL6IP5, ASPH, BAK1, BCKDK, BRCA2, BST2, C3, C5, CARD16, CARD17, CASP1, CASP10, CASP12, CASP4, CASP5, CD68, CST7, CSTA, CTSB, CTSZ, CYCS, DLEC1, DNAJA1, DNAJC1, DNPEP, EDEM2, ELF4, EXOSC7, FAS, FYN, GAS6, GLMN, GRN, GSK3A, HSP90AB1, HSP90AB3P, HSPA1A, HSPA1B, HSPD1, HSPE1, IFI16, IFI6, IL1B, IL1R2, JAK2, KARS, LAMP3, LGALS9, LRRK2, LYPLA1, MYH9, N…	13.8158	[5, 6]	GO biological process	[Group29, Group31]	8.99e-10
phosphorylation	GO:0016310	0.000752058	350	[ABCA2, ABCD1, ACTR1A, ADAR, ADRB2, AGAP2, AIDA, AIF1, AK3, AKAP13, AKAP8L, AKIRIN2, AKT1, AKT3, ALDH1A1, ALPK1, ANGPT1, ANKLE2, ANXA2, ANXA2P2, ARL6IP5, ATF3, ATM, ATP2B4, ATP5MF, BAK1, BCKDK, BCR, BMX, BTN2A2, C3, C5, CAMK2D, CAMK2G, CASS4, CCDC88C, CCL2, CCM2, CCNG2, CCNJL, CCNK, CCNL2, CD40, CD74, CDC42BPB, CDK5RAP3, CEACAM1, CERK, CIITA, CISH, CKS2, CLK1, CLK4, CMPK2, COA6, COX5B, COX6B1, CO…	11.9576	[5]	GO biological process	[Group29]	8.99e-10
kinase activity	GO:0016301	0.0145207	223	[ABCA2, ACTR1A, ADAR, ADRB2, AGAP2, AIDA, AK3, AKAP13, AKAP8L, AKT1, AKT3, ALPK1, ANGPT1, ATM, ATP2B4, BCKDK, BCR, BMX, BTN2A2, C5, CAMK2D, CAMK2G, CASS4, CCL2, CCNG2, CCNJL, CCNK, CCNL2, CD40, CD74, CDC42BPB, CDK5RAP3, CEACAM1, CERK, CIITA, CISH, CKS2, CLK1, CLK4, CMPK2, CRIPAK, CSF1, CST7, CXCL10, CXCL9, DAPK2, DGKD, DNAJA1, DSTYK, DTNBP1, DUSP10, DUSP28, DUSP3, DUSP5, DYRK2, EGR1, EIF2AK2, ENP…	12.4027	[6]	GO biological process	[Group29]	8.99e-10
activation of innate immune response	GO:0002218	4.9724e-07	82	[ADRB2, AIM2, ALPK1, APPL2, CD209, CGAS, CLEC6A, CTSB, CTSK, CTSL, CUL1, DDX58, DDX60, DHX58, EPG5, FCER1G, FCN1, FFAR2, FYN, GALM, HSP90AA1, HSPA1A, HSPA1B, HSPD1, IFI16, IFIH1, IRAK2, IRF1, IRF7, LY96, MUC1, MYD88, NFKB1, NFKBIA, NLRP6, NOD1, NOD2, NRAS, OTUD4, PAK1, PHF11, PIK3AP1, PPIP5K1, PRKCD, PSMA2, PSMA3, PSMA4, PSMA5, PSMA6, PSMB10, PSMB2, PSMB3, PSMB8, PSMB9, PSME1, PSME2, PSPC1, PYCAR…	19.2037	[3, 5, 6, 7, 8]	GO biological process	[Group28, Group30]	2.54e-15
innate immune response-activating signal transduction	GO:0002758	7.65208e-06	74	[ADRB2, ALPK1, APPL2, CD209, CLEC6A, CTSB, CTSK, CTSL, CUL1, DDX58, DDX60, DHX58, EPG5, FCER1G, FCN1, FFAR2, FYN, GALM, HSP90AA1, HSPA1A, HSPA1B, HSPD1, IFIH1, IRAK2, IRF1, IRF7, LY96, MUC1, MYD88, NFKB1, NFKBIA, NLRP6, NOD1, NOD2, NRAS, OTUD4, PAK1, PHF11, PIK3AP1, PRKCD, PSMA2, PSMA3, PSMA4, PSMA5, PSMA6, PSMB10, PSMB2, PSMB3, PSMB8, PSMB9, PSME1, PSME2, RELA, RELB, RIPK1, RIPK2, RSAD2, RTN4, S…	18.9258	[4, 5, 6, 7, 8, 9]	GO biological process	[Group28, Group30]	2.54e-15
tumor necrosis factor-mediated signaling pathway	GO:0033209	0.000616825	46	[ADRB2, AIM2, CARD16, CASP1, CASP4, CD40, GAS6, HSPA1A, HSPA1B, ILK, JAK2, KARS, KRT8, LRRFIP1, LTBR, NFKBIA, PSMA2, PSMA3, PSMA4, PSMA5, PSMA6, PSMB10, PSMB2, PSMB3, PSMB8, PSMB9, PSME1, PSME2, PTK2B, PYCARD, RBCK1, RELA, RIPK1, SPPL2A, STAT1, STS, TANK, TDRD7, TIFA, TNF, TNFAIP3, TNFRSF1A, TNFSF13, TNFSF13B, TRAF1, TRAF3]	20.6278	[5, 6, 7]	GO biological process	[Group28]	2.54e-15
interleukin-1-mediated signaling pathway	GO:0070498	0.000309215	31	[CUL1, EGR1, GALM, IL1B, IL1R1, IL1R2, IL1RN, IRAK2, MYD88, NFKB1, NFKBIA, NOD1, NOD2, OTUD4, PLCB1, PSMA2, PSMA3, PSMA4, PSMA5, PSMA6, PSMB10, PSMB2, PSMB3, PSMB8, PSMB9, PSME1, PSME2, RELA, RIPK2, TNFRSF1A, VRK2]	25.6198	[5, 6, 7]	GO biological process	[Group28, Group30]	2.54e-15
response to tumor necrosis factor	GO:0034612	0.0227024	67	[ADRB2, AIM2, AKT1, CARD16, CASP1, CASP4, CCL2, CD40, CUL9, CXCL16, GAS6, GBP1, GBP2, GBP3, GCH1, HDAC4, HSP90AA1, HSPA1A, HSPA1B, ICAM1, ILK, JAK2, KARS, KAT2A, KRT8, LRRFIP1, LTBR, MAPK1, NFE2L2, NFKB1, NFKBIA, NUB1, PSMA2, PSMA3, PSMA4, PSMA5, PSMA6, PSMB10, PSMB2, PSMB3, PSMB8, PSMB9, PSME1, PSME2, PTK2B, PYCARD, RBCK1, RELA, RIPK1, RORA, RUNX2, SPPL2A, STAT1, STS, TANK, TDRD7, TIFA, TNF, TNF…	16.0671	[5]	GO biological process	[Group28]	2.54e-15
response to interleukin-1	GO:0070555	0.00105422	51	[CCL2, CD38, CD40, CUL1, CUL9, EGR1, GALM, GBP1, GBP2, GBP3, HDAC4, HIF1A, ICAM1, IL1B, IL1R1, IL1R2, IL1RN, IRAK2, KMO, LGALS9, MAPK13, MYD88, NFKB1, NFKBIA, NOD1, NOD2, OTUD4, PLCB1, PSMA2, PSMA3, PSMA4, PSMA5, PSMA6, PSMB10, PSMB2, PSMB3, PSMB8, PSMB9, PSME1, PSME2, PYCARD, RELA, RIPK2, RORA, S1PR4, SRC, STS, TANK, TNFRSF1A, VRK2, ZC3H12A]	19.3916	[5]	GO biological process	[Group28]	2.54e-15
antigen processing and presentation of endogenous peptide antigen via MHC class I	GO:0019885	0.000707959	11	[B2M, HLA-A, HLA-B, HLA-C, HLA-E, HLA-F, HLA-G, HLA-H, TAP1, TAP2, TAPBP]	55	[5]	GO biological process	[Group28, Group33]	2.54e-15
antigen processing and presentation of exogenous peptide antigen via MHC class I	GO:0042590	7.52154e-09	34	[B2M, CALR, CYBB, FCER1G, FCGR1A, FCGR1B, FCGR1CP, HLA-A, HLA-B, HLA-C, HLA-E, HLA-F, HLA-G, HLA-H, IFI30, NCF1, PDIA3, PSMA2, PSMA3, PSMA4, PSMA5, PSMA6, PSMB10, PSMB2, PSMB3, PSMB8, PSMB9, PSME1, PSME2, TAP1, TAP2, TAPBP, TNFRSF1A, VAMP3]	35.0515	[5]	GO biological process	[Group28, Group33]	2.54e-15
proteasomal ubiquitin-independent protein catabolic process	GO:0010499	0.0421267	11	[NFE2L2, PSMA2, PSMA3, PSMA4, PSMA5, PSMA6, PSMB10, PSMB2, PSMB3, PSMB8, PSMB9]	39.2857	[6, 7, 8, 9]	GO biological process	[Group28]	2.54e-15
cellular response to interleukin-1	GO:0071347	0.000808856	46	[CCL2, CD40, CUL1, CUL9, EGR1, GALM, GBP1, GBP2, GBP3, HIF1A, ICAM1, IL1B, IL1R1, IL1R2, IL1RN, IRAK2, KMO, MAPK13, MYD88, NFKB1, NFKBIA, NOD1, NOD2, OTUD4, PLCB1, PSMA2, PSMA3, PSMA4, PSMA5, PSMA6, PSMB10, PSMB2, PSMB3, PSMB8, PSMB9, PSME1, PSME2, PYCARD, RELA, RIPK2, RORA, STS, TANK, TNFRSF1A, VRK2, ZC3H12A]	20.354	[6]	GO biological process	[Group28]	2.54e-15
cellular response to tumor necrosis factor	GO:0071356	0.00976008	64	[ADRB2, AIM2, AKT1, CARD16, CASP1, CASP4, CCL2, CD40, CUL9, GAS6, GBP1, GBP2, GBP3, HDAC4, HSP90AA1, HSPA1A, HSPA1B, ICAM1, ILK, JAK2, KARS, KAT2A, KRT8, LRRFIP1, LTBR, MAPK1, NFE2L2, NFKB1, NFKBIA, PSMA2, PSMA3, PSMA4, PSMA5, PSMA6, PSMB10, PSMB2, PSMB3, PSMB8, PSMB9, PSME1, PSME2, PTK2B, PYCARD, RBCK1, RELA, RIPK1, RORA, RUNX2, SPPL2A, STAT1, STS, TANK, TDRD7, TIFA, TNF, TNFAIP3, TNFRSF1A, TNFS…	16.6667	[6]	GO biological process	[Group28]	2.54e-15
antigen processing and presentation of exogenous peptide antigen via MHC class I, TAP-dependent	GO:0002479	5.65671e-08	32	[B2M, CALR, CYBB, FCGR1A, FCGR1B, FCGR1CP, HLA-A, HLA-B, HLA-C, HLA-E, HLA-F, HLA-G, HLA-H, NCF1, PDIA3, PSMA2, PSMA3, PSMA4, PSMA5, PSMA6, PSMB10, PSMB2, PSMB3, PSMB8, PSMB9, PSME1, PSME2, TAP1, TAP2, TAPBP, TNFRSF1A, VAMP3]	34.4086	[6]	GO biological process	[Group28, Group33]	2.54e-15
threonine-type endopeptidase activity	GO:0004298	0.011668	11	[PSMA2, PSMA3, PSMA4, PSMA5, PSMA6, PSMB10, PSMB2, PSMB3, PSMB8, PSMB9, TASP1]	44	[8, 9]	GO biological process	[Group28]	2.54e-15
negative regulation of viral process	GO:0048525	9.02859e-11	41	[APOBEC3B, APOBEC3D, APOBEC3F, APOBEC3G, BANF1, BST2, C19orf66, CCNK, CHMP3, EIF2AK2, FAM111A, FCN1, IFI16, IFIT1, IFIT5, IFITM1, IFITM2, IFITM3, ISG15, MX1, OAS1, OAS3, OASL, PARP10, PLSCR1, PML, PPIP5K1, RNASEL, RSAD2, SRPK2, STAT1, TNF, TRIM14, TRIM21, TRIM25, TRIM26, TRIM5, TRIM6, ZC3H12A, ZC3HAV1, ZFP36]	34.4538	[3, 4, 5, 6]	GO biological process	[Group27]	7.61e-17
defense response to other organism	GO:0098542	1.19046e-09	125	[ADAR, ADRB2, AIM2, ANXA3, APOBEC3B, APOBEC3D, APOBEC3F, APOBEC3G, ATG16L1, BATF2, BCL3, BST2, C19orf66, CALCOCO2, CD40, CFP, CGAS, CLEC6A, CXCL10, CXCL9, DDX17, DDX58, DDX60, DEF6, DHX58, DSE, DTX3L, EIF2AK2, ERCC6, FAM111A, FCER1G, FCN2, GALM, GBP1, GBP3, GBP6, GNLY, GRN, GSDMD, HERC5, HIF1A, HIST1H2BK, HLA-A, HLA-E, IFI16, IFI44L, IFI6, IFIH1, IFIT1, IFIT2, IFIT3, IFIT5, IFITM1, IFITM2, IFITM3…	17.9856	[3, 4, 5]	GO biological process	[Group27]	7.61e-17
negative regulation of viral life cycle	GO:1903901	2.02314e-11	38	[APOBEC3B, APOBEC3D, APOBEC3F, APOBEC3G, BANF1, BST2, C19orf66, CCNK, CHMP3, EIF2AK2, FAM111A, FCN1, IFI16, IFIT1, IFIT5, IFITM1, IFITM2, IFITM3, ISG15, MX1, OAS1, OAS3, OASL, PARP10, PLSCR1, PML, PPIP5K1, RNASEL, RSAD2, SRPK2, TNF, TRIM21, TRIM25, TRIM26, TRIM5, TRIM6, ZC3H12A, ZC3HAV1]	38	[4, 5, 6, 7]	GO biological process	[Group27]	7.61e-17
regulation of viral process	GO:0050792	1.6232e-07	59	[ADAR, ANXA2, ANXA2P2, APOBEC3B, APOBEC3D, APOBEC3F, APOBEC3G, BANF1, BST2, C19orf66, CCNK, CD74, CHD1, CHMP2A, CHMP2B, CHMP3, DYNLT1, EIF2AK2, FAM111A, FCN1, GTF2B, HLA-DRB1, IFI16, IFIT1, IFIT5, IFITM1, IFITM2, IFITM3, ISG15, LAMP3, LARP1, LGALS9, MX1, OAS1, OAS3, OASL, PARP10, PLSCR1, PML, PPIP5K1, RAB7A, RNASEL, RSAD2, SRPK2, STAT1, SUPT4H1, TBC1D20, TNF, TNFRSF1A, TRIM14, TRIM21, TRIM25, TRI…	22.8682	[4, 5]	GO biological process	[Group27]	7.61e-17
negative regulation of viral genome replication	GO:0045071	1.02713e-10	31	[APOBEC3B, APOBEC3D, APOBEC3F, APOBEC3G, BANF1, BST2, C19orf66, CCNK, EIF2AK2, FAM111A, IFI16, IFIT1, IFIT5, IFITM1, IFITM2, IFITM3, ISG15, MX1, OAS1, OAS3, OASL, PARP10, PLSCR1, PPIP5K1, RNASEL, RSAD2, SRPK2, TNF, TRIM6, ZC3H12A, ZC3HAV1]	43.0556	[5, 6, 7, 8]	GO biological process	[Group27]	7.61e-17
viral genome replication	GO:0019079	5.34301e-08	43	[ADAR, APOBEC3B, APOBEC3D, APOBEC3F, APOBEC3G, ATG16L1, BANF1, BST2, C19orf66, C3, CCL2, CCNK, CD209, CLEC4M, CXCR6, EIF2AK2, FAM111A, GAS6, IFI16, IFIT1, IFIT5, IFITM1, IFITM2, IFITM3, ISG15, LARP1, MX1, OAS1, OAS3, OASL, PARP10, PI4KA, PLSCR1, PPIP5K1, RNASEL, RSAD2, SRPK2, TBC1D20, TNF, TRIM38, TRIM6, ZC3H12A, ZC3HAV1]	28.1046	[5, 6]	GO biological process	[Group27]	7.61e-17
regulation of viral life cycle	GO:1903900	1.01863e-08	50	[ADAR, ANXA2, ANXA2P2, APOBEC3B, APOBEC3D, APOBEC3F, APOBEC3G, BANF1, BST2, C19orf66, CCNK, CD74, CHMP2A, CHMP2B, CHMP3, EIF2AK2, FAM111A, FCN1, HLA-DRB1, IFI16, IFIT1, IFIT5, IFITM1, IFITM2, IFITM3, ISG15, LAMP3, LARP1, LGALS9, MX1, OAS1, OAS3, OASL, PARP10, PLSCR1, PML, PPIP5K1, RNASEL, RSAD2, SRPK2, TBC1D20, TNF, TRIM21, TRIM25, TRIM26, TRIM38, TRIM5, TRIM6, ZC3H12A, ZC3HAV1]	26.738	[5, 6]	GO biological process	[Group27]	7.61e-17
viral life cycle	GO:0019058	1.70566e-06	80	[ADAR, ANXA2, ANXA2P2, APOBEC3B, APOBEC3D, APOBEC3F, APOBEC3G, ATG16L1, BANF1, BST2, C19orf66, C3, CAPG, CCL2, CCNK, CD209, CD74, CHMP2A, CHMP2B, CHMP3, CHMP5, CLEC4M, CLEC5A, CTSB, CXCR6, DYNLT1, EIF2AK2, FAM111A, FCN1, GAS6, HLA-DRB1, HSP90AB1, HSPA1A, HSPA1B, ICAM1, IFI16, IFIT1, IFIT5, IFITM1, IFITM2, IFITM3, ISG15, ITGA5, KPNB1, LAMP3, LARP1, LDLR, LGALS9, MRC1, MVB12A, MX1, NUP62, NUP85, OA…	19.0476	[5]	GO biological process	[Group27]	7.61e-17
regulation of viral genome replication	GO:0045069	9.55477e-07	35	[ADAR, APOBEC3B, APOBEC3D, APOBEC3F, APOBEC3G, BANF1, BST2, C19orf66, CCNK, EIF2AK2, FAM111A, IFI16, IFIT1, IFIT5, IFITM1, IFITM2, IFITM3, ISG15, LARP1, MX1, OAS1, OAS3, OASL, PARP10, PLSCR1, PPIP5K1, RNASEL, RSAD2, SRPK2, TBC1D20, TNF, TRIM38, TRIM6, ZC3H12A, ZC3HAV1]	29.4118	[6, 7]	GO biological process	[Group27]	7.61e-17
positive regulation of proteolysis	GO:0045862	0.000352452	79	[AIM2, AKIRIN2, AKT1, ARL6IP5, ASPH, BAK1, BRCA2, CARD16, CASP1, CASP10, CASP12, CASP4, CASP5, CD68, CTSB, CYCS, DLEC1, DNPEP, EDEM2, ELF4, FAS, FYN, GRN, GSK3A, HSPA1A, HSPA1B, HSPD1, HSPE1, IFI16, IL1B, JAK2, KARS, LGALS9, LRRK2, LYPLA1, MYH9, NBN, NFE2L2, NLRP1, NLRP12, NOD1, NUB1, OGT, OSBPL7, PLGRKT, PMAIP1, PML, PPM1F, PRELID1, PRICKLE1, PSME1, PSME2, PTK2, PTK2B, PYCARD, PYHIN1, RBBP8, RIP…	16.9892	[5, 6, 7, 8]	GO biological process	[Group26, Group31]	1.02e-08
regulation of peptidase activity	GO:0052547	0.0389869	85	[A2M, AIM2, AKIRIN2, AKT1, APPL2, ARL6IP5, ASPH, BAK1, BCKDK, BRCA2, BST2, C3, C5, CARD16, CARD17, CASP1, CASP10, CASP12, CASP4, CASP5, CD68, CST7, CSTA, CTSB, CYCS, DLEC1, DNAJA1, DNPEP, ELF4, EXOSC7, FAS, FYN, GAS6, GRN, HSPD1, HSPE1, IFI16, IFI6, JAK2, KARS, LAMP3, LGALS9, LYPLA1, NBN, NLRP1, NLRP12, NOD1, PLAUR, PMAIP1, PML, PPM1F, PPOX, PRDX3, PRELID1, PSMA3, PSMB8, PSMB9, PSME1, PSME2, PTK2…	14.8601	[5, 6, 7]	GO biological process	[Group26, Group31]	1.02e-08
enzyme activator activity	GO:0008047	0.0146144	96	[ACAP1, ADAP2, ADPRH, AGAP1, AGAP11, AGAP2, AGAP4, AGAP5, AGAP6, AGAP7P, AGAP9, AHSA1, AHSA2P, ALDH1A1, ARHGAP15, ARHGAP17, ARHGAP4, ARHGEF1, ARHGEF11, ATP1B3, BCR, BRD8, CASP1, CCNK, CD68, CEP250, CKS2, CST7, CTSA, CTSB, DAPK2, DCP1A, DEPDC5, DLEC1, DNAJA1, DNAJC1, DNAJC19, DNAJC24, DOCK4, DTX3L, EGR2, ERCC6, GAS6, GM2A, HSPA8, LPAL2, LRRK2, MYO9B, NCF1, NCF1B, NCF1C, NLRP1, NLRP12, NOD1, NPRL2,…	14.7239	[5]	GO biological process	[Group26]	1.02e-08
positive regulation of peptidase activity	GO:0010952	0.000891266	51	[AIM2, AKIRIN2, ARL6IP5, ASPH, BAK1, BRCA2, CASP1, CASP10, CASP12, CASP4, CASP5, CD68, CTSB, CYCS, DLEC1, DNPEP, ELF4, FAS, FYN, GRN, HSPD1, HSPE1, IFI16, JAK2, KARS, LGALS9, LYPLA1, NBN, NLRP1, NLRP12, NOD1, PMAIP1, PML, PPM1F, PRELID1, PSME1, PSME2, PYCARD, RIPK1, RIPK2, STAT3, STS, TANK, TAP1, TNF, TNFSF10, TNFSF13, TPP1, TSC22D3, TXNRD1, WDR35]	19.6154	[6, 7, 8, 9]	GO biological process	[Group26, Group31]	1.02e-08
GTPase activator activity	GO:0005096	0.0360913	55	[ACAP1, ADAP2, ADPRH, AGAP1, AGAP11, AGAP2, AGAP4, AGAP5, AGAP6, AGAP7P, AGAP9, ALDH1A1, ARHGAP15, ARHGAP17, ARHGAP4, ARHGEF1, ARHGEF11, BCR, BRD8, CEP250, DAPK2, DEPDC5, DLEC1, DOCK4, EGR2, LRRK2, MYO9B, NPRL2, PLCB1, RALGAPA1, RANGAP1, RASA3, RASAL3, RASGRP3, RBCK1, RGS1, RGS14, RGS2, RIPK1, RP2, SGSM2, SIPA1L1, SOS1, SRGAP2, STARD8, STXBP5, TAGAP, TBC1D10C, TBC1D19, TBC1D20, TBC1D2B, TBC1D30, …	16.8712	[6, 7]	GO biological process	[Group26]	1.02e-08
positive regulation of endopeptidase activity	GO:0010950	5.14443e-05	49	[AIM2, AKIRIN2, ARL6IP5, ASPH, BAK1, BRCA2, CASP1, CASP10, CASP12, CASP4, CASP5, CD68, CTSB, CYCS, DLEC1, DNPEP, ELF4, FAS, FYN, HSPD1, HSPE1, IFI16, JAK2, LGALS9, LYPLA1, NBN, NLRP1, NLRP12, NOD1, PMAIP1, PML, PPM1F, PRELID1, PSME1, PSME2, PYCARD, RIPK1, RIPK2, STAT3, STS, TANK, TAP1, TNF, TNFSF10, TNFSF13, TPP1, TSC22D3, TXNRD1, WDR35]	21.5859	[7, 8, 9, 10]	GO biological process	[Group26, Group31]	1.02e-08
positive regulation of cysteine-type endopeptidase activity	GO:2001056	0.000224771	43	[AIM2, ARL6IP5, ASPH, BAK1, BRCA2, CASP1, CASP10, CASP12, CASP4, CASP5, CTSB, CYCS, DLEC1, DNPEP, ELF4, FAS, FYN, HSPD1, HSPE1, IFI16, JAK2, LGALS9, LYPLA1, NBN, NLRP1, NLRP12, NOD1, PMAIP1, PML, PPM1F, PYCARD, RIPK1, RIPK2, STS, TANK, TAP1, TNF, TNFSF10, TNFSF13, TPP1, TSC22D3, TXNRD1, WDR35]	21.8274	[8, 9, 10, 11]	GO biological process	[Group26, Group31]	1.02e-08
production of molecular mediator involved in inflammatory response	GO:0002532	0.0100315	22	[ABCD1, APPL2, CISH, DUSP10, ELF4, FCER1G, GALM, GBP5, GRN, IDO1, IL17RC, IL1R2, KARS, MYD88, NLRC3, NOD2, PYCARD, SLAMF8, STS, TICAM1, UHRF2, ZC3H12A]	26.506	[2, 5]	GO biological process	[Group25]	6.64e-17
negative regulation of defense response	GO:0031348	3.934e-06	56	[A2M, ABCD1, ADRB2, APPL2, BCR, C1QTNF3, CEACAM1, CST7, DHX58, DUSP10, ELF4, FEM1C, FOXP3, GRN, HLA-A, HLA-B, HLA-DRB1, HLA-E, HLA-F, HLA-G, IFI16, IL1R2, LDLR, LGALS9, LILRB1, MICA, MICB, NFKB1, NLRC3, NLRC5, NLRP12, NLRP6, NMI, NR1H2, PARP14, PNPLA6, PRKCD, PSMA2, PYCARD, RB1, RIPK2, RORA, SAMHD1, SERPINB9, SERPING1, SLAMF8, SOCS3, SOS1, STS, TNFAIP3, TNFAIP6, TNFRSF1A, TRAFD1, TRIM38, ZC3H12A,…	21.7054	[3, 4, 5, 6]	GO biological process	[Group25, Group30, Group33]	6.64e-17
positive regulation of defense response	GO:0031349	2.78673e-08	118	[ADRB2, AIM2, ALPK1, APPL2, C3, CCM2, CCR2, CD209, CGAS, CISH, CLEC6A, CTSB, CTSK, CTSL, CUL1, CUL9, DDX58, DDX60, DHX58, EPG5, FCER1G, FCN1, FFAR2, FYN, GALM, GBP5, GRN, HLA-E, HLA-F, HLA-G, HSP90AA1, HSPA1A, HSPA1B, HSPD1, IDO1, IFI16, IFIH1, IL15, IL17RC, IL1B, IRAK2, IRF1, IRF7, JAK2, KARS, LCP1, LDLR, LRRK2, LY96, MAPK13, MICA, MICB, MUC1, MYD88, NFKB1, NFKBIA, NLRC5, NLRP12, NLRP6, NOD1, NO…	17.5595	[3, 4, 5, 6]	GO biological process	[Group25, Group30, Group32]	6.64e-17
negative regulation of immune effector process	GO:0002698	0.000919559	34	[A2M, ANGPT1, BCR, BST2, CCR2, CD59, CEACAM1, DHX58, DUSP10, FOXP3, GRN, HLA-A, HLA-B, HLA-E, HLA-F, HLA-G, HLX, JAK3, LGALS9, LILRB1, LPAL2, MICA, MICB, PARP3, PTPN6, S1PR4, SERPINB9, SERPING1, SLAMF8, SMAD7, TGFB1, TNF, TRIM38, ZC3H12A]	23.2877	[3, 4, 5]	GO biological process	[Group25, Group33]	6.64e-17
negative regulation of immune response	GO:0050777	8.67198e-06	44	[A2M, ANGPT1, BCR, BST2, CCR2, CD59, CEACAM1, DHX58, DUSP10, FOXP3, GRN, HLA-A, HLA-B, HLA-DRB1, HLA-E, HLA-F, HLA-G, HLX, IFI16, JAK3, LGALS9, LILRB1, LPAL2, MICA, NLRC3, NLRC5, NLRP6, NMI, NR1H2, PARP14, PARP3, PSMA2, PTPN6, S1PR4, SAMHD1, SERPINB9, SERPING1, SLAMF8, SMAD7, TGFB1, TNF, TNFAIP3, TRAFD1, ZC3H12A]	23.913	[3, 4, 5]	GO biological process	[Group25, Group33]	6.64e-17
cytokine production involved in inflammatory response	GO:0002534	0.00270522	18	[ABCD1, APPL2, CISH, ELF4, GALM, GBP5, IDO1, IL17RC, IL1R2, KARS, MYD88, NLRC3, NOD2, PYCARD, STS, TICAM1, UHRF2, ZC3H12A]	32.7273	[3, 6]	GO biological process	[Group25]	6.64e-17
negative regulation of innate immune response	GO:0045824	5.40205e-07	25	[A2M, CEACAM1, DHX58, DUSP10, GRN, HLA-A, HLA-B, HLA-E, HLA-F, HLA-G, IFI16, LGALS9, LILRB1, MICA, NLRC3, NLRC5, NMI, NR1H2, PARP14, SAMHD1, SERPINB9, SERPING1, SLAMF8, TNFAIP3, TRAFD1]	38.4615	[4, 5, 6, 7]	GO biological process	[Group25, Group33]	6.64e-17
regulation of inflammatory response	GO:0050727	0.00042931	76	[ABCD1, ADRB2, APPL2, ATM, BCR, BRCA2, C1QTNF3, C3, CCM2, CCR2, CISH, CST7, CUL9, DUSP10, ELF4, FANCA, FCER1G, FEM1C, FFAR2, FOXP3, GALM, GBP5, GRN, HLA-DRB1, HLA-E, IDO1, IL15, IL17RC, IL1B, IL1R1, IL1R2, IL1RN, JAK2, KARS, LCP1, LDLR, LRRK2, MAPK13, MYD88, NFKB1, NFKBIA, NLRC3, NLRP1, NLRP12, NLRP6, NOD2, NRF1, PHF11, PIK3AP1, PLA2G7, PNPLA6, PRKCD, PSMA2, PSMA6, PYCARD, RB1, RBBP8, RELA, RORA,…	17.1558	[4, 5, 6]	GO biological process	[Group25, Group30]	6.64e-17
secretion by cell	GO:0032940	3.3909e-06	258	[A2M, ABAT, ADA2, ADGRE5, ADRB2, AIF1, AIM2, ALDH1A1, AMPD3, AMY2A, ANGPT1, ANXA2, ANXA3, ANXA4, ANXA5, APPL2, ARHGAP17, ARL8A, ARSB, ATP2A2, ATP6V0A1, ATP6V1C1, ATP8A1, B2M, BCKDK, BCR, BRI3, BST2, BTN2A2, BTN3A1, C12orf4, C1QTNF3, C3, C3AR1, C5, CACNA1E, CACNA2D2, CAMK2G, CAPN1, CARD16, CARD17, CASP1, CCM2, CCR2, CD244, CD274, CD2AP, CD38, CD40, CD53, CD59, CD63, CD68, CEACAM1, CFP, CHMP2A, CLE…	13.3196	[2, 5]	GO biological process	[Group24, Group32]	2.86e-08
exocytosis	GO:0006887	0.00162501	160	[A2M, ADA2, ADGRE5, ALDH1A1, AMPD3, AMY2A, ANGPT1, ANXA2, ANXA3, ANXA5, APPL2, ARHGAP17, ARL8A, ARSB, ATP2A2, ATP6V0A1, ATP6V1C1, ATP8A1, B2M, BCKDK, BCR, BRI3, BST2, C12orf4, C3, C3AR1, CAPN1, CCR2, CD53, CD59, CD63, CD68, CEACAM1, CFP, CHMP2A, CLEC5A, CRACR2A, CREG1, CST7, CTSA, CTSB, CTSZ, CYB5R3, CYBB, DAPK2, DLEC1, DTNBP1, DYNLT1, ERP44, FBXL20, FCER1G, FCN1, FGL2, GAS6, GLB1, GM2A, GMCL1, G…	13.6286	[3, 5, 6]	GO biological process	[Group24]	2.86e-08
leukocyte degranulation	GO:0043299	1.25998e-05	115	[ADA2, ADGRE5, ALDH1A1, AMPD3, ANGPT1, ANXA2, ANXA3, ARL8A, ARSB, ATP6V0A1, ATP6V1C1, ATP8A1, B2M, BCR, BRI3, BST2, C12orf4, C3, C3AR1, CAPN1, CCR2, CD53, CD59, CD63, CD68, CEACAM1, CFP, CLEC5A, CRACR2A, CREG1, CST7, CTSA, CTSB, CTSZ, CYB5R3, CYBB, DLEC1, DYNLT1, ERP44, FCER1G, FCN1, FGL2, GLB1, GM2A, GMCL1, GNS, GPR84, GRN, GSDMD, HLA-A, HLA-B, HLA-C, HLA-F, HLA-H, HSP90AA1, HSP90AB1, HSPA1A, HS…	16.0839	[3, 5, 7, 8]	GO biological process	[Group24]	2.86e-08
regulation of protein secretion	GO:0050708	0.0417451	90	[ABAT, ADRB2, AIF1, AIM2, ANGPT1, ANXA4, ANXA5, BTN2A2, C1QTNF3, C3, C5, CACNA1E, CACNA2D2, CARD16, CARD17, CASP1, CCM2, CD244, CD274, CD2AP, CD38, CD40, CLEC5A, CLEC6A, CSTA, DAPK2, DDX58, DLEC1, DNAJC1, FCN1, FFAR2, FOXP3, GALM, GAS6, GBP1, GLMN, GSDMD, HCAR2, HIF1A, HK1, HLA-DRB1, HLA-E, HMGN3, IFIH1, IL17RC, IL1B, IL1R2, IRS1, IRS2, ITPR3, JAK2, KARS, LCP1, LGALS9, LILRB1, LPAL2, LRRK2, NBN, …	14.5867	[4, 5, 6, 7, 8, 9]	GO biological process	[Group24, Group32]	2.86e-08
myeloid cell activation involved in immune response	GO:0002275	4.71783e-06	118	[ADA2, ADGRE5, ALDH1A1, AMPD3, ANGPT1, ANXA2, ANXA3, ARL8A, ARSB, ATP6V0A1, ATP6V1C1, ATP8A1, B2M, BCR, BRI3, BST2, C12orf4, C3, C3AR1, CAPN1, CCR2, CD53, CD59, CD63, CD68, CEACAM1, CFP, CLEC5A, CRACR2A, CREG1, CST7, CTSA, CTSB, CTSZ, CYB5R3, CYBB, DLEC1, DYNLT1, ERP44, FCER1G, FCN1, FGL2, GLB1, GM2A, GMCL1, GNS, GPR84, GRN, GSDMD, HLA-A, HLA-B, HLA-C, HLA-H, HSP90AA1, HSP90AB1, HSPA1A, HSPA1B, H…	16.2534	[4, 5]	GO biological process	[Group24]	2.86e-08
granulocyte activation	GO:0036230	1.18432e-05	111	[ADA2, ADGRE5, ALDH1A1, AMPD3, ANGPT1, ANXA2, ANXA3, ARL8A, ARSB, ATP6V0A1, ATP6V1C1, ATP8A1, B2M, BCR, BRI3, BST2, C3, C3AR1, CAPN1, CCR2, CD53, CD59, CD63, CD68, CEACAM1, CFP, CLEC5A, CRACR2A, CREG1, CST7, CTSA, CTSB, CTSZ, CYB5R3, CYBB, DLEC1, DYNLT1, ERP44, FCER1G, FCN1, FGL2, GLB1, GM2A, GMCL1, GNS, GPR84, GRN, GSDMD, HLA-A, HLA-B, HLA-C, HLA-H, HSP90AA1, HSP90AB1, HSPA1A, HSPA1B, HSPA8, IDH…	16.2996	[4, 5]	GO biological process	[Group24]	2.86e-08
regulated exocytosis	GO:0045055	0.00258449	144	[A2M, ADA2, ADGRE5, ALDH1A1, AMPD3, AMY2A, ANGPT1, ANXA2, ANXA3, ANXA5, APPL2, ARHGAP17, ARL8A, ARSB, ATP2A2, ATP6V0A1, ATP6V1C1, ATP8A1, B2M, BCKDK, BCR, BRI3, BST2, C12orf4, C3, C3AR1, CAPN1, CCR2, CD53, CD59, CD63, CD68, CEACAM1, CFP, CLEC5A, CRACR2A, CREG1, CST7, CTSA, CTSB, CTSZ, CYB5R3, CYBB, DAPK2, DLEC1, DTNBP1, DYNLT1, ERP44, FBXL20, FCER1G, FCN1, FGL2, GAS6, GLB1, GM2A, GMCL1, GNS, GPR8…	13.8462	[4, 6, 7]	GO biological process	[Group24]	2.86e-08
neutrophil activation	GO:0042119	2.33173e-05	109	[ADA2, ADGRE5, ALDH1A1, AMPD3, ANGPT1, ANXA2, ANXA3, ARL8A, ARSB, ATP6V0A1, ATP6V1C1, ATP8A1, B2M, BCR, BRI3, BST2, C3, C3AR1, CAPN1, CD53, CD59, CD63, CD68, CEACAM1, CFP, CLEC5A, CRACR2A, CREG1, CST7, CTSA, CTSB, CTSZ, CYB5R3, CYBB, DLEC1, DYNLT1, ERP44, FCER1G, FCN1, FGL2, GLB1, GM2A, GMCL1, GNS, GPR84, GRN, GSDMD, HLA-A, HLA-B, HLA-C, HLA-H, HSP90AA1, HSP90AB1, HSPA1A, HSPA1B, HSPA8, IDH1, IL1…	16.1721	[5, 6]	GO biological process	[Group24]	2.86e-08
neutrophil mediated immunity	GO:0002446	3.96654e-05	109	[ADA2, ADGRE5, ALDH1A1, AMPD3, ANGPT1, ANXA2, ANXA3, ARL8A, ARSB, ATP6V0A1, ATP6V1C1, ATP8A1, B2M, BCR, BRI3, BST2, C3, C3AR1, CAPN1, CD53, CD59, CD63, CD68, CEACAM1, CFP, CLEC5A, CRACR2A, CREG1, CST7, CTSA, CTSB, CTSZ, CYB5R3, CYBB, DLEC1, DYNLT1, ERP44, FCER1G, FCN1, FGL2, GLB1, GM2A, GMCL1, GNS, GPR84, GRN, GSDMD, HLA-A, HLA-B, HLA-C, HLA-H, HSP90AA1, HSP90AB1, HSPA1A, HSPA1B, HSPA8, IDH1, KPN…	16.0294	[5]	GO biological process	[Group24]	2.86e-08
negative regulation of cytokine production	GO:0001818	9.19069e-05	67	[ABCD1, ADRB2, ANGPT1, ANXA4, APPL2, ASB1, ATP2B1, BCL3, BST2, BTN2A2, C1QTNF3, CARD16, CARD17, CD274, CD2AP, CEACAM1, DDX58, DHX58, ELF4, FOXP3, GAS6, GBP1, HERC5, HLA-DRB1, HLA-F, HSP90AA1, HSP90AB1, IDO1, IFIH1, IL1R2, ISG15, JAK3, LGALS9, LILRB1, LPAL2, LRRFIP1, NFKB1, NLRC3, NLRC5, NLRP12, NMI, ORM1, PDCD1LG2, PML, PPIP5K1, PTPN6, PYCARD, RELB, RNF216, S1PR4, SMAD7, SOS1, STS, TBK1, TGFB1, T…	18.5596	[3, 4, 5]	GO biological process	[Group23, Group32]	4.49e-12
cytokine secretion	GO:0050663	1.64235e-05	65	[ADRB2, AIF1, AIM2, ANGPT1, ANXA4, BTN2A2, BTN3A1, C1QTNF3, C3, C5, CARD16, CARD17, CASP1, CCM2, CD244, CD274, CLEC5A, CLEC6A, DDX58, FCN1, FFAR2, FOXP3, GALM, GAS6, GBP1, GBP5, GLMN, GSDMD, HK1, HLA-DRB1, IFIH1, IL17RC, IL1B, IL1R2, KARS, LCP1, LCP2, LGALS9, LILRB1, LPAL2, LRRK2, NBN, NLRP1, NLRP12, NOD2, ORM1, P2RX7, PANX2, PMAIP1, PML, PPIP5K1, PYCARD, RIPK2, RUNX2, S1PR4, SOCS1, SRC, STS, TLR…	19.7568	[3, 4, 6, 7, 8, 9]	GO biological process	[Group23, Group32]	4.49e-12
regulation of cytokine secretion	GO:0050707	1.07523e-06	62	[ADRB2, AIF1, AIM2, ANGPT1, ANXA4, BTN2A2, C1QTNF3, C3, C5, CARD16, CARD17, CASP1, CCM2, CD244, CD274, CLEC5A, CLEC6A, DDX58, FCN1, FFAR2, FOXP3, GALM, GAS6, GBP1, GLMN, GSDMD, HK1, HLA-DRB1, IFIH1, IL17RC, IL1B, IL1R2, KARS, LCP1, LGALS9, LILRB1, LPAL2, LRRK2, NBN, NLRP1, NLRP12, NOD2, ORM1, P2RX7, PANX2, PMAIP1, PML, PPIP5K1, PYCARD, RIPK2, RUNX2, S1PR4, SOCS1, SRC, STS, TLR5, TLR8, TNF, TNFAIP…	21.5278	[4, 5, 6, 7, 8, 9, 10]	GO biological process	[Group23, Group32]	4.49e-12
negative regulation of type I interferon production	GO:0032480	8.58503e-06	22	[DDX58, DHX58, HERC5, IFIH1, ISG15, LILRB1, LRRFIP1, NLRC3, NLRC5, NMI, PPIP5K1, PYCARD, RELB, RNF216, STS, TBK1, TIFA, TNFAIP3, TRIM25, UBA7, UBE2E2, UBE2L6]	37.931	[4, 5, 6]	GO biological process	[Group23]	4.49e-12
regulation of type I interferon production	GO:0032479	4.00733e-07	42	[CGAS, DDX58, DHX58, HERC5, HIF1A, HSPD1, IFI16, IFIH1, IRF1, IRF7, ISG15, LILRB1, LRRFIP1, MYD88, NFKB1, NLRC3, NLRC5, NMI, PPIP5K1, PYCARD, RELA, RELB, RIPK2, RNF216, STAT1, STS, TBK1, TICAM1, TIFA, TLR7, TLR8, TNFAIP3, TRAF3, TRIM21, TRIM25, TRIM38, TRIM56, UBA7, UBE2E2, UBE2L6, ZBP1, ZBTB20]	26.9231	[4, 5]	GO biological process	[Group23]	4.49e-12
positive regulation of interferon-alpha production	GO:0032727	0.0421267	11	[DDX58, HIF1A, HSPD1, IFIH1, IRF7, PPIP5K1, RIPK2, STAT1, TBK1, TLR7, TLR8]	39.2857	[5, 6, 7]	GO biological process	[Group23]	4.49e-12
regulation of interferon-alpha production	GO:0032647	0.0159732	13	[DDX58, HIF1A, HSPD1, IFIH1, IRF7, NLRC3, NMI, PPIP5K1, RIPK2, STAT1, TBK1, TLR7, TLR8]	37.1429	[5, 6]	GO biological process	[Group23]	4.49e-12
regulation of interferon-beta production	GO:0032648	0.000352153	21	[DDX58, IFIH1, IRF1, IRF7, LILRB1, LRRFIP1, NLRC3, NMI, PPIP5K1, PYCARD, RELB, RIPK2, RNF216, STS, TBK1, TICAM1, TLR7, TLR8, TRAF3, TRIM38, ZBTB20]	32.8125	[5, 6]	GO biological process	[Group23]	4.49e-12
cell surface receptor signaling pathway	GO:0007166	4.45291e-09	468	[ABAT, ACP2, ACTR1A, ACTR3, ADAR, ADGRE5, ADGRG5, ADRB2, AGAP2, AGO1, AGO4, AIM2, AKIRIN2, AKR1A1, AKT1, ANGPT1, ANXA2, ANXA3, ANXA4, APPL2, ARHGEF18, ASGR2, ATF3, ATM, ATP6V0A1, ATP6V0D1, ATP6V1C1, ATP6V1E1, ATP6V1F, ATP6V1G1, B2M, BAK1, BCL3, BCR, BMX, BRCA2, BRD7P3, BRD8, BRI3, BRWD1, BST2, BTN2A2, BTN3A1, C3, C3AR1, C5, CAMK2D, CAMK2G, CAPG, CAPN1, CAPZA1, CARD16, CASP1, CASP10, CASP4, CBY1, …	12.4601	[3, 4, 5]	GO biological process	[Group22]	5.97e-17
cytokine-mediated signaling pathway	GO:0019221	1.06145e-23	202	[ADAR, ADRB2, AIM2, AKT1, ANGPT1, ANXA2, APPL2, B2M, BRWD1, BST2, CAMK2D, CAMK2G, CAPZA1, CARD16, CASP1, CASP4, CCL2, CCM2, CCR2, CCRL2, CD40, CD74, CEACAM1, CIITA, CISH, CSF1, CSF2RB, CUL1, CUL9, CXCL10, CXCL11, CXCL9, CXCR6, EGR1, FAN1, FCER1G, FCGR1A, FCGR1B, FCGR1CP, FYN, GALM, GAS6, GBP1, GBP2, GRB2, HIF1A, HLA-A, HLA-B, HLA-C, HLA-DPA1, HLA-DQB1, HLA-DQB2, HLA-DRA, HLA-DRB1, HLA-E, HLA-F, H…	20.2202	[4, 5, 6]	GO biological process	[Group22, Group30]	5.97e-17
response to interferon-gamma	GO:0034341	7.90003e-23	83	[ACTR3, AIF1, B2M, BST2, C19orf66, CALCOCO2, CAMK2D, CAMK2G, CASP1, CCL2, CD40, CDC42EP4, CEP250, CIITA, CUL9, CXCL16, ELF4, FCGR1A, FCGR1B, FCGR1CP, GBP1, GBP2, GBP4, GBP5, GBP6, GCH1, HLA-A, HLA-B, HLA-C, HLA-DPA1, HLA-DQB1, HLA-DQB2, HLA-DRA, HLA-DRB1, HLA-E, HLA-F, HLA-G, HLA-H, HSP90AB1, ICAM1, IFI30, IFITM1, IFITM2, IFITM3, IL12RB1, IRF1, IRF2, IRF7, IRF9, JAK1, JAK2, KYNU, LGALS9, MRC1, MT…	33.4677	[4, 5]	GO biological process	[Group22]	5.97e-17
regulation of defense response	GO:0031347	5.51707e-15	178	[A2M, ABCD1, ADRB2, AIM2, ALPK1, APOBEC3F, APOBEC3G, APPL2, ATM, BCR, BRCA2, C1QTNF3, C3, CCM2, CCR2, CD209, CEACAM1, CGAS, CISH, CLEC6A, CST7, CTSB, CTSK, CTSL, CUL1, CUL9, DDX58, DDX60, DHX58, DTX3L, DUSP10, ELF4, EPG5, ERCC6, FANCA, FCER1G, FCN1, FEM1C, FFAR2, FOXP3, FYN, GALM, GBP5, GRN, HERC5, HLA-A, HLA-B, HLA-DRB1, HLA-E, HLA-F, HLA-G, HSP90AA1, HSP90AB1, HSPA1A, HSPA1B, HSPD1, IDO1, IFI16…	18.0527	[4, 5]	GO biological process	[Group22, Group25, Group30, Group32]	5.97e-17
interferon-gamma-mediated signaling pathway	GO:0060333	4.14239e-22	53	[B2M, CAMK2D, CAMK2G, CIITA, FCGR1A, FCGR1B, FCGR1CP, GBP1, GBP2, HLA-A, HLA-B, HLA-C, HLA-DPA1, HLA-DQB1, HLA-DQB2, HLA-DRA, HLA-DRB1, HLA-E, HLA-F, HLA-G, HLA-H, HSP90AB1, ICAM1, IFI30, IRF1, IRF2, IRF7, IRF9, JAK1, JAK2, MT2A, NLRC5, NMI, NR1H2, OAS1, OAS2, OAS3, OASL, PARP14, PARP9, PML, PRKCD, SOCS1, SOCS3, SP100, STAT1, TRIM21, TRIM25, TRIM26, TRIM34, TRIM38, TRIM5, TXK]	47.3214	[5, 6, 7]	GO biological process	[Group22]	5.97e-17
cellular response to interferon-gamma	GO:0071346	1.45579e-17	71	[ACTR3, AIF1, B2M, CAMK2D, CAMK2G, CASP1, CCL2, CDC42EP4, CEP250, CIITA, CUL9, FCGR1A, FCGR1B, FCGR1CP, GBP1, GBP2, GBP4, GBP5, GBP6, HLA-A, HLA-B, HLA-C, HLA-DPA1, HLA-DQB1, HLA-DQB2, HLA-DRA, HLA-DRB1, HLA-E, HLA-F, HLA-G, HLA-H, HSP90AB1, ICAM1, IFI30, IL12RB1, IRF1, IRF2, IRF7, IRF9, JAK1, JAK2, LGALS9, MRC1, MT2A, NLRC5, NMI, NR1H2, OAS1, OAS2, OAS3, OASL, PARP14, PARP9, PML, PRKCD, RAB12, R…	31.5556	[5, 6]	GO biological process	[Group22]	5.97e-17
cellular response to cytokine stimulus	GO:0071345	6.64609e-21	249	[ABCD4, ACTR3, ADAR, ADRB2, AIF1, AIM2, AKT1, ANGPT1, ANXA2, APPL2, B2M, BRWD1, BST2, CAMK2D, CAMK2G, CAPZA1, CARD16, CASP1, CASP4, CCL2, CCM2, CCR2, CCRL2, CD40, CD74, CDC42EP4, CEACAM1, CEP250, CIITA, CISH, CSF1, CSF2RB, CUL1, CUL9, CXCL10, CXCL11, CXCL9, CXCR6, EGR1, FAN1, FAS, FCER1G, FCGR1A, FCGR1B, FCGR1CP, FYN, GALM, GAS6, GBP1, GBP2, GBP3, GBP4, GBP5, GBP6, GRB2, GSK3A, HDAC4, HIF1A, HLA-…	17.7098	[5]	GO biological process	[Group22]	5.97e-17
positive regulation of DNA-binding transcription factor activity	GO:0051091	0.00421821	62	[AIM2, AKIRIN2, AKT1, ANXA3, CARD16, CD40, DDX58, EIF2AK2, GALM, HDAC4, HMGN3, HSPA1A, HSPA1B, ICAM1, IL1B, IRAK2, JAK2, KIT, LGALS9, LPAR1, LRRFIP1, MPRIP, MT1A, MYD88, NFAM1, NFKB1, NOD1, NOD2, PLA2G6, PPARGC1B, PPIP5K1, PRDX3, PRKD2, PSMA6, PTK2B, PYCARD, RBCK1, RELA, RIPK1, RIPK2, RORA, STAT3, STK3, STS, TAF10, TANK, TDRD7, TEP1, TGFB1, TICAM1, TIMELESS, TNF, TRAF1, TRAF5, TRIM14, TRIM21, TRI…	17.3184	[2, 3, 4, 7, 8, 9, 10, 11, 12, 13]	GO biological process	[Group21]	5.73e-05
positive regulation of NF-kappaB transcription factor activity	GO:0051092	0.00297634	43	[AIM2, AKIRIN2, CARD16, CD40, EIF2AK2, GALM, HSPA1A, HSPA1B, ICAM1, IL1B, IRAK2, LGALS9, LRRFIP1, MPRIP, MT1A, MYD88, NFKB1, NOD1, NOD2, PLA2G6, PRDX3, PRKD2, PSMA6, PYCARD, RBCK1, RELA, RIPK1, RIPK2, RORA, STAT3, STS, TANK, TDRD7, TGFB1, TICAM1, TNF, TRAF1, TRAF5, TRIM14, TRIM25, TRIM38, TRIM5, TRIM52]	20	[3, 4, 5, 8, 9, 10, 11, 12, 13, 14]	GO biological process	[Group21]	5.73e-05
regulation of DNA-binding transcription factor activity	GO:0051090	0.000545389	92	[ADRB2, AIM2, AKIRIN2, AKT1, ANXA3, ANXA4, BRCA2, CARD16, CD40, CDK5RAP3, CREBZF, DDX58, DNPEP, EIF2AK2, FANCA, FOXP3, GALM, GAS6, HDAC4, HMGN3, HSP90AA1, HSPA1A, HSPA1B, ICAM1, IL1B, IRAK2, JAK2, KIT, LGALS9, LPAR1, LRRFIP1, MAPK1, MPRIP, MSTO1, MT1A, MYD88, NBN, NFAM1, NFKB1, NFKBIA, NFKBIE, NLRC3, NLRC5, NLRP12, NOD1, NOD2, PARP10, PLA2G6, PPARGC1B, PPIP5K1, PRDX3, PRKD2, PSMA6, PTCH1, PTK2B, …	16.0279	[3, 6, 7, 8, 9, 10, 11, 12]	GO biological process	[Group21]	5.73e-05
regulation of RNA metabolic process	GO:0051252	0.00645871	505	[ABCA2, ACOT7, ACP2, ACTA2, ACTR1A, ACTR3, ADRB2, AFF1, AGAP2, AGO1, AHCTF1, AHNAK, AIM2, AKAP17A, AKAP8L, AKIRIN2, AKNA, AKR1A1, AKT1, AMY1A, AMY1B, ANXA3, ANXA4, APBB3, ARHGEF11, ARNTL2, ATF3, ATF5, ATF7, ATM, ATP2B4, ATXN1, BATF2, BAZ1A, BAZ2A, BBX, BCL3, BNC2, BRCA2, BRD1, BRD7P3, BRD8, BRWD1, BTG1, BTN2A2, CALR, CAMK2D, CAMK2G, CARD16, CASZ1, CBX7, CBY1, CC2D1B, CCL2, CCM2, CCNK, CCNL2, CD38…	11.1504	[4, 5, 6, 7]	GO biological process	[Group21]	5.73e-05
regulation of macromolecule biosynthetic process	GO:0010556	0.0341803	530	[ABCA2, ACOT7, ACP2, ACTA2, ACTR1A, ACTR3, ADRB2, AFF1, AGAP2, AGO1, AGO4, AHCTF1, AIM2, AKAP17A, AKAP8L, AKIRIN2, AKNA, AKR1A1, AKT1, AMY1A, AMY1B, ANXA3, ANXA4, APBB3, ARHGEF11, ARNTL2, ASB1, ATF3, ATF5, ATF7, ATM, ATP2B4, ATXN1, BATF2, BAZ1A, BAZ2A, BBX, BCL3, BNC2, BRCA2, BRD1, BRD7P3, BRD8, BRI3, BRWD1, BTG1, BTN2A2, CALR, CAMK2D, CAMK2G, CARD16, CASZ1, CBX7, CBY1, CC2D1B, CCL2, CCM2, CCNK, …	10.9369	[4, 5]	GO biological process	[Group21]	5.73e-05
DNA-binding transcription factor activity	GO:0003700	0.00810724	295	[ACTR1A, ADRB2, AFF1, AHCTF1, AIM2, AKIRIN2, AKNA, AKR1A1, AKT1, ANXA3, ANXA4, ARNTL2, ATF3, ATF5, ATF7, ATM, BATF2, BBX, BCL3, BNC2, BRCA2, BRD8, CARD16, CASZ1, CC2D1B, CD40, CDK5RAP3, CHMP2B, CIR1, CREBZF, CSTA, DDX58, DNAJC1, DNPEP, DRAP1, DTL, EGR1, EGR2, EIF2AK2, ELF4, ELK1, ETV6, ETV7, EXOSC7, EZH1, FANCA, FOXN2, FOXP3, GALM, GAS6, GATAD1, GON4L, HCFC1, HDAC4, HENMT1, HHEX, HIF1A, HIVEP1, H…	11.9627	[6, 7, 8, 9, 10, 11]	GO biological process	[Group21]	5.73e-05
positive regulation of adaptive immune response	GO:0002821	0.000163511	32	[B2M, C3, CCR2, CD274, CD40, FCER1G, FOXP3, HLA-A, HLA-B, HLA-C, HLA-E, HLA-F, HLA-G, HLA-H, HLX, HSPD1, IL12RB1, IL1B, IL1R1, IL1RN, P2RX7, PYCARD, RIPK2, RSAD2, S1PR4, STS, TANK, TGFB1, TNF, TNFSF13, TNFSF13B, ZBTB1]	25.8065	[4, 5, 6]	GO biological process	[Group20, Group33]	3.63e-10
positive regulation of interleukin-6 production	GO:0032755	0.000205588	31	[AIF1, AKIRIN2, DDX58, FCER1G, GALM, HSPD1, IFIH1, IL17RC, IL1B, IL1R1, IL1RN, LCP1, LGALS9, LILRB2, MAPK13, MYD88, NOD1, NOD2, P2RX7, PPIP5K1, PYCARD, RIPK2, STAT3, STS, TICAM1, TLR7, TLR8, TNF, TXNRD1, TYROBP, ZBTB20]	26.0504	[4, 5, 6]	GO biological process	[Group20, Group32]	3.63e-10
positive regulation of interferon-gamma production	GO:0032729	0.0440132	20	[BCL3, CCR2, CD244, HLA-A, HLA-DPA1, HSPD1, IL12RB1, IL1B, IL1R1, IL1RN, LGALS9, PDE4B, PDE4D, PYCARD, RIPK2, STS, TLR7, TLR8, TNF, TXK]	25.641	[4, 5, 6]	GO biological process	[Group20, Group32, Group33]	3.63e-10
regulation of adaptive immune response	GO:0002819	2.76391e-05	46	[B2M, C3, CCR2, CD274, CD40, CEACAM1, DUSP10, FCER1G, FOXP3, HLA-A, HLA-B, HLA-C, HLA-E, HLA-F, HLA-G, HLA-H, HLX, HSPD1, IL12RB1, IL1B, IL1R1, IL1RN, IRF1, IRF7, JAK3, LILRB1, MPRIP, P2RX7, PAK1, PARP3, PTPN6, PYCARD, RIPK2, RSAD2, S1PR4, SMAD7, STS, TANK, TGFB1, TNF, TNFAIP3, TNFSF13, TNFSF13B, WAS, ZBTB1, ZC3H12A]	22.6601	[4, 5]	GO biological process	[Group20, Group33]	3.63e-10
regulation of interferon-gamma production	GO:0032649	0.00433889	30	[ADRB2, BCL3, CCR2, CD244, CD274, FOXP3, GAS6, HLA-A, HLA-DPA1, HLA-DRB1, HSPD1, IL12RB1, IL1B, IL1R1, IL1RN, ISG15, LGALS9, LILRB1, MPRIP, PDCD1LG2, PDE4B, PDE4D, PYCARD, RIPK2, STS, TLR7, TLR8, TNF, TXK, ZC3H12A]	23.2558	[4, 5]	GO biological process	[Group20, Group33]	3.63e-10
regulation of T cell proliferation	GO:0042129	0.0365122	41	[AIF1, BTN2A2, CAPG, CCR2, CD209, CD274, DLG5, FOXP3, GLMN, GNRH1, HLA-A, HLA-DMB, HLA-DPA1, HLA-DRB1, HLA-E, HLA-G, IDO1, IL12RB1, IL15, IL1B, IRF1, JAK3, LGALS9, LILRB1, LILRB2, MPRIP, NEU1, PDCD1LG2, PTPN6, PYCARD, RASAL3, RIPK2, S1PR4, SH3RF1, SOS1, STS, TDRD7, TGFB1, TMEM131L, TNFSF13B, ZAP70]	18.6364	[6, 7, 8]	GO biological process	[Group20, Group33]	3.63e-10
pyrophosphatase activity	GO:0016462	0.000755841	223	[ABCA2, ABCA5, ABCB1, ABCC10, ABCC5, ABCD1, ABCD4, ACAP1, ACTR1A, ADAP2, ADPRH, AGAP1, AGAP11, AGAP2, AGAP4, AGAP5, AGAP6, AGAP7P, AGAP9, AHSA1, AHSA2P, AK3, ALDH1A1, ALPL, ANXA5, ARF3, ARHGAP15, ARHGAP17, ARHGAP4, ARHGEF1, ARHGEF11, ARL8A, ATP10D, ATP1B3, ATP2A2, ATP2A3, ATP2B1, ATP2B4, ATP5MF, ATP6V0A1, ATP6V0D1, ATP6V1C1, ATP6V1E1, ATP6V1F, ATP6V1G1, ATP8A1, ATP9B, BANF1, BCR, BMX, BRD8, BTN2A…	12.8976	[5]	GO molecular function	[Group19, Group26]	7.93e-10
nucleoside-triphosphatase regulator activity	GO:0060589	0.00101417	71	[ACAP1, ADAP2, ADPRH, AGAP1, AGAP11, AGAP2, AGAP4, AGAP5, AGAP6, AGAP7P, AGAP9, AHSA1, AHSA2P, ALDH1A1, ARHGAP15, ARHGAP17, ARHGAP4, ARHGEF1, ARHGEF11, ATP1B3, BCR, BRD8, CDC42SE1, CEP250, CISH, DAPK2, DEPDC5, DLEC1, DNAJA1, DNAJC1, DNAJC19, DNAJC24, DOCK4, EGR2, HSPA8, HSPH1, LRRK2, MYO9B, NPRL2, PLCB1, PLN, RALGAPA1, RANGAP1, RASA3, RASAL3, RASGRP3, RBCK1, RGS1, RGS14, RGS2, RIPK1, RP2, SGSM2, …	17.1913	[5]	GO biological process	[Group19, Group26]	7.93e-10
positive regulation of hydrolase activity	GO:0051345	1.24241e-08	156	[ACAP1, ADAP2, ADPRH, AGAP1, AGAP11, AGAP2, AGAP4, AGAP5, AGAP6, AGAP7P, AGAP9, AHSA1, AHSA2P, AIM2, AKIRIN2, AKT1, ALDH1A1, ARHGAP15, ARHGAP17, ARHGAP4, ARHGEF1, ARHGEF11, ARL6IP5, ASPH, ATP1B3, BAK1, BCR, BRCA2, BRD8, CASP1, CASP10, CASP12, CASP4, CASP5, CCL2, CD40, CD68, CEP250, CTSB, CUL9, CYCS, DAPK2, DENND1A, DEPDC5, DLEC1, DNAJA1, DNAJC1, DNAJC19, DNAJC24, DNPEP, DOCK4, EGR2, ELF4, FAS, FG…	16.1826	[5]	GO biological process	[Group19, Group26, Group31]	7.93e-10
nucleoside-triphosphatase activity	GO:0017111	0.000777757	217	[ABCA2, ABCA5, ABCB1, ABCC10, ABCC5, ABCD1, ABCD4, ACAP1, ACTR1A, ADAP2, ADPRH, AGAP1, AGAP11, AGAP2, AGAP4, AGAP5, AGAP6, AGAP7P, AGAP9, AHSA1, AHSA2P, AK3, ALDH1A1, ANXA5, ARF3, ARHGAP15, ARHGAP17, ARHGAP4, ARHGEF1, ARHGEF11, ARL8A, ATP10D, ATP1B3, ATP2A2, ATP2A3, ATP2B1, ATP2B4, ATP5MF, ATP6V0A1, ATP6V0D1, ATP6V1C1, ATP6V1E1, ATP6V1F, ATP6V1G1, ATP8A1, ATP9B, BANF1, BCR, BMX, BRD8, BTN2A2, CCL…	12.9862	[6]	GO molecular function	[Group19, Group26]	7.93e-10
ATPase activity	GO:0016887	0.0380435	92	[ABCA2, ABCA5, ABCB1, ABCC10, ABCC5, ABCD1, ABCD4, AHSA1, AHSA2P, AK3, ANXA5, ATP10D, ATP1B3, ATP2A2, ATP2A3, ATP2B1, ATP2B4, ATP5MF, ATP6V0A1, ATP6V0D1, ATP6V1C1, ATP6V1E1, ATP6V1F, ATP6V1G1, ATP8A1, ATP9B, BANF1, BTN2A2, CCL2, CHD1, CHD1L, CHD3, CHD6, CLPB, DDX17, DLEC1, DNAH1, DNAJA1, DNAJC1, DNAJC19, DNAJC24, DNHD1, DYNC2H1, ERCC6, FGFR1OP, HELZ2, HNRNPU, HSP90AA1, HSP90AB1, HSPA1A, HSPA1B, H…	14.557	[7]	GO molecular function	[Group19]	7.93e-10
regulation of defense response to virus	GO:0050688	7.30633e-06	28	[AIM2, APOBEC3F, APOBEC3G, CGAS, DDX58, DDX60, DHX58, DTX3L, ERCC6, HERC5, IFIT1, IL12RB1, IL15, IL1B, LILRB1, MICB, PARP9, PPIP5K1, PYCARD, RNF216, STAT1, STS, TNFAIP3, TRAF3, TRIM38, TRIM6, TSPAN32, ZC3H12A]	31.8182	[3, 4, 5, 6, 7]	GO biological process	[Group18, Group27]	3.62e-21
response to virus	GO:0009615	2.35754e-19	103	[ACTA2, ADAR, AIM2, APOBEC3B, APOBEC3D, APOBEC3F, APOBEC3G, BANF1, BCL3, BST2, C19orf66, CCT5, CD40, CGAS, CREBZF, CXCL10, CXCL9, DDX17, DDX58, DDX60, DHX58, DTX3L, EIF2AK2, ERCC6, FAM111A, FOXP3, GBP1, GBP3, HERC5, HIF1A, HSPB1, IFI16, IFI44, IFI44L, IFI6, IFIH1, IFIT1, IFIT2, IFIT3, IFIT5, IFITM1, IFITM2, IFITM3, IL10RB, IL12RB1, IL15, IL1B, IRF1, IRF2, IRF7, IRF9, ISG15, LGALS9, LILRB1, MICA, …	26.2087	[3, 5]	GO biological process	[Group18, Group27]	3.62e-21
regulation of defense response to virus by host	GO:0050691	1.35916e-06	21	[AIM2, APOBEC3F, APOBEC3G, CGAS, DDX58, DTX3L, ERCC6, IL12RB1, IL15, IL1B, LILRB1, MICB, PARP9, PPIP5K1, PYCARD, RNF216, STAT1, STS, TNFAIP3, TRIM6, ZC3H12A]	42.8571	[4, 5, 6, 7, 8]	GO biological process	[Group18]	3.62e-21
positive regulation of defense response to virus by host	GO:0002230	2.84223e-05	16	[AIM2, APOBEC3F, APOBEC3G, CGAS, DDX58, DTX3L, ERCC6, IL12RB1, LILRB1, PARP9, PPIP5K1, PYCARD, STAT1, STS, TRIM6, ZC3H12A]	47.0588	[5, 6, 7, 8, 9]	GO biological process	[Group18]	3.62e-21
NAD+ ADP-ribosyltransferase activity	GO:0003950	8.6186e-05	15	[DTX3L, HMGN1, PARP10, PARP11, PARP12, PARP14, PARP15, PARP3, PARP6, PARP9, SIRT5, TGFB1, TNKS, TSPAN32, ZC3HAV1]	46.875	[5]	GO molecular function	[Group17]	8.56e-07
protein ADP-ribosylation	GO:0006471	0.0081984	15	[PARP10, PARP11, PARP12, PARP14, PARP15, PARP3, PARP6, PARP9, PNKP, SIRT5, TNKS, TSPAN32, WARS, ZC3HAV1, ZNF83]	34.8837	[6, 7]	GO biological process	[Group17]	8.56e-07
protein mono-ADP-ribosylation	GO:0140289	0.00940749	8	[PARP10, PARP11, PARP12, PARP14, PARP15, PARP3, PARP6, TNKS]	61.5385	[7, 8]	GO biological process	[Group17]	8.56e-07
protein ADP-ribosylase activity	GO:1990404	0.038686	8	[PARP10, PARP11, PARP12, PARP14, PARP15, PARP3, PARP6, TNKS]	53.3333	[7, 8]	GO biological process	[Group17]	8.56e-07
leukocyte homeostasis	GO:0001776	0.00729005	28	[AKT1, BAK1, CCR2, CD74, FCER1G, FOXP3, HCAR2, HIF1A, ITPKB, JAK3, LGALS9, MPRIP, MTHFD1, P2RX7, PAK1, PDE4B, PMAIP1, PTK2B, S1PR4, SBNO2, SH2B2, SH2B3, SOS1, STAT5A, TGFB1, TNFAIP3, TNFSF13B, TSC22D3]	23.5294	[2, 5]	GO biological process	[Group16]	8.56e-08
myeloid cell homeostasis	GO:0002262	0.0130521	39	[AKIRIN2, AMPD3, ARSB, B2M, BAK1, CCR2, CHMP2B, FCER1G, FOXP3, G6PD, HCAR2, HIF1A, HSPA1A, HSPA1B, ISG15, ITPKB, JAK2, JAK3, KIT, LDB2, MAFB, MIA3, MTHFD1, NCSTN, NRF1, P4HTM, PDE4B, PRDX1, RB1, S1PR4, SH2B3, SOS1, SP3, STAT1, STAT3, STAT5A, TGFBR3, THRA, ZFP36]	19.697	[2, 5]	GO biological process	[Group16, Group33]	8.56e-08
myeloid cell differentiation	GO:0030099	0.0104461	83	[AGO1, AGO4, AKIRIN2, AKR1A1, ANXA2, ANXA2P2, ARSB, B2M, BATF2, CAMK2G, CD74, CEACAM1, CHMP2B, CLEC5A, CSF1, DHRS7B, EIF2AK2, FAS, FCER1G, G6PD, GAB3, HIF1A, HLA-DRB1, HSPA1A, HSPA1B, IFI16, IL31RA, IRF7, ISG15, ITPKB, JAK2, JAK3, KIT, LDB2, LILRB1, LILRB3, LILRB4, LTBR, MAFB, MIA3, MOV10, MT1G, MYH9, NFKBIA, NRF1, OSCAR, P4HTM, PAF1, PEX2, PML, PPARGC1B, PRDX3, PTK2B, PTPN6, RB1, RBCK1, RBM15, R…	15.4562	[4, 5, 6, 7, 8]	GO biological process	[Group16, Group33]	8.56e-08
leukocyte apoptotic process	GO:0071887	0.0389674	32	[AKT1, BAK1, CASP7, CD274, CD74, CTSL, FCER1G, GALM, GAS6, HCAR2, HIF1A, HM13, IDO1, IRF7, IRS2, ITPKB, JAK3, LGALS9, LILRB1, MPRIP, NOD2, P2RX7, PAK1, PRELID1, PTK2B, RHBDF2, RIPK1, S1PR4, STAT5A, TARP, TEP1, TSC22D3]	20.5128	[5]	GO biological process	[Group16]	8.56e-08
positive regulation of response to cytokine stimulus	GO:0060760	4.95463e-05	26	[CASP1, CASP4, CD74, CSF1, DDX58, GAS6, HIF1A, HSPA1A, HSPA1B, IFIH1, IL1R1, IL1RN, IRF7, NLRC5, PARP14, PARP9, PPIP5K1, RIPK1, RIPK2, TANK, TBK1, TMED7-TICAM2, TRIM6, TXK, YWHAE, ZBP1]	30.9524	[3, 4, 5, 6]	GO biological process	[Group15]	6.54e-09
regulation of response to cytokine stimulus	GO:0060759	6.73526e-07	56	[ADRB2, ANGPT1, CARD16, CASP1, CASP4, CD74, CSF1, DDX58, GAS6, HIF1A, HSP90AB1, HSPA1A, HSPA1B, IFIH1, IL1R1, IL1R2, IL1RN, IRAK2, IRF7, JAK1, JAK2, LRRFIP1, NDUFA1, NLRC5, NR1H2, OTUD4, PARP14, PARP9, PPIP5K1, PTPN1, PTPN6, PYCARD, RBCK1, RIPK1, RIPK2, RNASEL, SAMHD1, SH2B3, SOCS1, SOCS3, SPPL2A, STAT1, STS, TANK, TBK1, TIFA, TMED7-TICAM2, TNF, TNFAIP3, TNFRSF1A, TRAF1, TRIM6, TXK, VRK2, YWHAE, …	22.6721	[3, 4, 5]	GO biological process	[Group15]	6.54e-09
positive regulation of cytokine-mediated signaling pathway	GO:0001961	0.000145274	24	[CASP1, CASP4, CD74, CSF1, GAS6, HIF1A, HSPA1A, HSPA1B, IL1R1, IL1RN, IRF7, NLRC5, PARP14, PARP9, PPIP5K1, RIPK1, RIPK2, TANK, TBK1, TMED7-TICAM2, TRIM6, TXK, YWHAE, ZBP1]	31.1688	[4, 5, 6, 7, 8]	GO biological process	[Group15]	6.54e-09
regulation of cytokine-mediated signaling pathway	GO:0001959	1.04993e-06	54	[ADRB2, ANGPT1, CARD16, CASP1, CASP4, CD74, CSF1, GAS6, HIF1A, HSP90AB1, HSPA1A, HSPA1B, IL1R1, IL1R2, IL1RN, IRAK2, IRF7, JAK1, JAK2, LRRFIP1, NDUFA1, NLRC5, NR1H2, OTUD4, PARP14, PARP9, PPIP5K1, PTPN1, PTPN6, PYCARD, RBCK1, RIPK1, RIPK2, RNASEL, SAMHD1, SH2B3, SOCS1, SOCS3, SPPL2A, STAT1, STS, TANK, TBK1, TIFA, TMED7-TICAM2, TNF, TNFAIP3, TNFRSF1A, TRAF1, TRIM6, TXK, VRK2, YWHAE, ZBP1]	22.8814	[4, 5, 6, 7]	GO biological process	[Group15]	6.54e-09
I-kappaB kinase/NF-kappaB signaling	GO:0007249	3.3465e-09	77	[ADRB2, AKAP13, AKT1, ALPK1, ANGPT1, APOL2, APOL3, BCL3, BST2, CARD16, CASP1, CASP10, CD40, CD74, CLEC6A, FKBP1A, FYN, GALM, GPR89A, GPR89B, HLA-DRB1, HSPB1, IFIT5, IL1B, IL1R1, IL1RN, IRAK2, LGALS9, LPAR1, LTBR, LY96, MPRIP, MYD88, NAPSA, NEK6, NFKBIA, NKIRAS2, NLRC3, NLRP12, NLRP6, NOD1, NOD2, NUP62, PIM2, PPIP5K1, PTK2B, PYCARD, RBCK1, RELA, RELB, RIPK1, RIPK2, RORA, SECTM1, SHISA5, STAT1, STS…	21.813	[4, 5, 6]	GO biological process	[Group14]	3.87e-11
positive regulation of I-kappaB kinase/NF-kappaB signaling	GO:0043123	1.19179e-06	55	[AKAP13, AKT1, ALPK1, APOL2, APOL3, BST2, CARD16, CASP1, CASP10, CD40, CD74, CLEC6A, FKBP1A, FYN, GALM, GPR89A, GPR89B, HLA-DRB1, IFIT5, IL1B, IL1R1, IL1RN, LGALS9, LPAR1, LTBR, MYD88, NEK6, NOD1, NOD2, NUP62, PIM2, PPIP5K1, PTK2B, RBCK1, RELA, RIPK1, RIPK2, RORA, SECTM1, SHISA5, TANK, TBK1, TFG, TGM2, TICAM1, TIFA, TMED7-TICAM2, TNF, TNFRSF1A, TNFSF10, TRAF5, TRIM25, TRIM38, TRIM5, TXNRD1]	22.541	[5, 6, 7, 8]	GO biological process	[Group14]	3.87e-11
regulation of I-kappaB kinase/NF-kappaB signaling	GO:0043122	3.93728e-07	66	[ADRB2, AKAP13, AKT1, ALPK1, ANGPT1, APOL2, APOL3, BST2, CARD16, CASP1, CASP10, CD40, CD74, CLEC6A, FKBP1A, FYN, GALM, GPR89A, GPR89B, HLA-DRB1, HSPB1, IFIT5, IL1B, IL1R1, IL1RN, LGALS9, LPAR1, LTBR, MYD88, NEK6, NLRC3, NLRP12, NLRP6, NOD1, NOD2, NUP62, PIM2, PPIP5K1, PTK2B, PYCARD, RBCK1, RELA, RIPK1, RIPK2, RORA, SECTM1, SHISA5, STAT1, STS, TANK, TBK1, TFG, TGM2, TICAM1, TIFA, TMED7-TICAM2, TNF…	21.2219	[5, 6, 7]	GO biological process	[Group14]	3.87e-11
protein transport	GO:0015031	0.000333536	309	[ABAT, ABCD1, ACAP1, ACTR1A, ADPRH, ADRB2, AGAP1, AGAP2, AHCTF1, AIF1, AIM2, AKAP5, AKAP8L, AKT1, ANGPT1, ANXA4, ANXA5, AP3M2, AP4B1, AP5B1, APPL2, ARCN1, ARF3, ARL8A, ATG16L1, ATG3, ATP6V0A1, ATP6V0D1, ATP6V1C1, ATP6V1E1, ATP6V1F, ATP6V1G1, BBS9, BCR, BRD8, BTN2A2, BTN3A1, C1QTNF3, C3, C5, CACNA1E, CACNA2D2, CALR, CAMK2G, CARD16, CARD17, CASP1, CCM2, CCRL2, CD244, CD274, CD2AP, CD38, CD40, CD63,…	12.3059	[4, 5, 6, 7]	GO biological process	[Group13]	3.39e-06
peptide transport	GO:0015833	0.000612545	312	[ABAT, ABCD1, ACAP1, ACTR1A, ADPRH, ADRB2, AGAP1, AGAP2, AHCTF1, AIF1, AIM2, AKAP5, AKAP8L, AKT1, ANGPT1, ANXA4, ANXA5, AP3M2, AP4B1, AP5B1, APPL2, ARCN1, ARF3, ARL8A, ATG16L1, ATG3, ATP6V0A1, ATP6V0D1, ATP6V1C1, ATP6V1E1, ATP6V1F, ATP6V1G1, BBS9, BCR, BRD8, BTN2A2, BTN3A1, C1QTNF3, C3, C5, CACNA1E, CACNA2D2, CALR, CAMK2G, CARD16, CARD17, CASP1, CCM2, CCRL2, CD209, CD244, CD274, CD2AP, CD38, CD40…	12.2018	[5, 6]	GO biological process	[Group13]	3.39e-06
amide transport	GO:0042886	0.000521669	318	[ABAT, ABCB1, ABCD1, ACAP1, ACTR1A, ADPRH, ADRB2, AGAP1, AGAP2, AHCTF1, AIF1, AIM2, AKAP5, AKAP8L, AKT1, ANGPT1, ANXA4, ANXA5, AP3M2, AP4B1, AP5B1, APPL2, ARCN1, ARF3, ARL8A, ATG16L1, ATG3, ATM, ATP6V0A1, ATP6V0D1, ATP6V1C1, ATP6V1E1, ATP6V1F, ATP6V1G1, BBS9, BCR, BRD8, BTN2A2, BTN3A1, C1QTNF3, C3, C5, CACNA1E, CACNA2D2, CALR, CAMK2G, CARD16, CARD17, CASP1, CCM2, CCRL2, CD209, CD244, CD274, CD2AP…	12.1933	[5]	GO biological process	[Group13]	3.39e-06
defense response to virus	GO:0051607	4.18204e-21	87	[ADAR, AIM2, APOBEC3B, APOBEC3D, APOBEC3F, APOBEC3G, BST2, C19orf66, CD40, CGAS, CXCL10, CXCL9, DDX17, DDX58, DDX60, DHX58, DTX3L, EIF2AK2, ERCC6, FAM111A, GBP1, GBP3, HERC5, HIF1A, IFI16, IFI44L, IFI6, IFIH1, IFIT1, IFIT2, IFIT3, IFIT5, IFITM1, IFITM2, IFITM3, IL10RB, IL12RB1, IL15, IL1B, IRF1, IRF2, IRF7, IRF9, ISG15, LILRB1, MICA, MICB, MX1, NLRC5, NT5C3A, OAS1, OAS2, OAS3, OASL, PARP9, PLSCR1…	30.7421	[3, 4, 5, 6]	GO biological process	[Group12, Group18, Group27]	1.35e-31
response to type I interferon	GO:0034340	2.1482e-21	52	[ADAR, BST2, C19orf66, EGR1, GBP2, HIF1A, HLA-A, HLA-B, HLA-C, HLA-E, HLA-F, HLA-G, HLA-H, HSP90AB1, IFI35, IFI6, IFIT1, IFIT2, IFIT3, IFITM1, IFITM2, IFITM3, IP6K2, IRF1, IRF2, IRF7, IRF9, ISG15, JAK1, MX1, MYD88, NLRC5, OAS1, OAS2, OAS3, OASL, PPIP5K1, PSMB8, PTPN1, PTPN6, RNASEL, RSAD2, SAMHD1, SP100, STAT1, STAT2, TBK1, TRIM56, TRIM6, TYK2, XAF1, ZBP1]	46.8468	[4, 5]	GO biological process	[Group12, Group27]	1.35e-31
type I interferon signaling pathway	GO:0060337	1.00364e-19	49	[ADAR, BST2, EGR1, GBP2, HLA-A, HLA-B, HLA-C, HLA-E, HLA-F, HLA-G, HLA-H, HSP90AB1, IFI35, IFI6, IFIT1, IFIT2, IFIT3, IFITM1, IFITM2, IFITM3, IP6K2, IRF1, IRF2, IRF7, IRF9, ISG15, JAK1, MX1, MYD88, NLRC5, OAS1, OAS2, OAS3, OASL, PPIP5K1, PSMB8, PTPN1, PTPN6, RNASEL, RSAD2, SAMHD1, SP100, STAT1, STAT2, TBK1, TRIM6, TYK2, XAF1, ZBP1]	46.2264	[5, 6, 7]	GO biological process	[Group12]	1.35e-31
interleukin-15-mediated signaling pathway	GO:0035723	0.000546293	9	[GRB2, IL15, IL15RA, IL2RG, JAK1, JAK3, PLCB1, STAT3, STAT5A]	69.2308	[5, 6, 7]	GO biological process	[Group11]	7.6e-08
interleukin-21-mediated signaling pathway	GO:0038114	0.0300824	6	[IL2RG, JAK1, JAK3, STAT1, STAT3, STAT4]	75	[5, 6, 7]	GO biological process	[Group11]	7.6e-08
response to interleukin-15	GO:0070672	7.19802e-05	10	[ACSL4, GRB2, IL15, IL15RA, IL2RG, JAK1, JAK3, PLCB1, STAT3, STAT5A]	71.4286	[5]	GO biological process	[Group11]	7.6e-08
cytokine biosynthetic process	GO:0042089	0.0338942	30	[ASB1, BCL3, CCR2, CYBB, EGR1, FOXP3, GLMN, HSPB1, IL1B, IMMP2L, IRF1, IRF7, LILRB1, LPAL2, MYD88, NFKB1, NLRP12, NMI, NOD1, RELA, SPPL2A, STAT3, TBK1, TICAM1, TLR7, TLR8, TNF, TYROBP, ZBP1, ZFP36]	21.1268	[3, 5, 6]	GO biological process	[Group10]	3.58e-05
regulation of cytokine biosynthetic process	GO:0042035	0.0415262	28	[ASB1, BCL3, CCR2, CYBB, EGR1, FOXP3, GLMN, HSPB1, IL1B, IMMP2L, IRF1, LILRB1, LPAL2, MYD88, NFKB1, NLRP12, NMI, RELA, SPPL2A, STAT3, TBK1, TICAM1, TLR7, TLR8, TNF, TYROBP, ZBP1, ZFP36]	21.7054	[4, 5, 6, 7]	GO biological process	[Group10]	3.58e-05
protein modification by small protein conjugation	GO:0032446	0.0145911	148	[ADRB2, AKT1, ANGPT1, ASB1, ATG3, C3, CARD16, CDK5RAP3, CISH, CUL1, CUL9, DAPK2, DCAF11, DCAF15, DCAF8, DCUN1D2, DNAJA1, DTL, DTX3L, EGR1, EGR2, EXOSC7, FBXL13, FBXL20, FBXL5, FBXO6, FBXW2, FBXW4, FEM1C, FKBP1A, FYN, GALM, GLMN, GMCL1, GSK3A, HACE1, HDAC4, HERC1, HERC2, HERC2P3, HERC5, HIF1A, HIST1H2BK, HLA-A, HSP90AA1, HSP90AB1, HSPA1A, HSPA1B, IFIH1, ISG15, KDM2B, KLHL22, KLHL24, LIMK1, LONRF1,…	13.3454	[7, 8]	GO biological process	[Group09]	5.32e-05
protein ubiquitination	GO:0016567	0.00940109	138	[ADRB2, AKT1, ANGPT1, ASB1, ATG3, C3, CARD16, CDK5RAP3, CISH, CUL1, CUL9, DAPK2, DCAF11, DCAF15, DCAF8, DCUN1D2, DNAJA1, DTL, DTX3L, EXOSC7, FBXL13, FBXL20, FBXL5, FBXO6, FBXW2, FBXW4, FEM1C, FKBP1A, FYN, GALM, GLMN, GMCL1, GSK3A, HACE1, HERC1, HERC2, HERC2P3, HERC5, HIF1A, HIST1H2BK, HLA-A, HSP90AA1, HSP90AB1, HSPA1A, HSPA1B, ISG15, KDM2B, KLHL22, KLHL24, LIMK1, LONRF1, LRRFIP1, LRRK2, MED10, ME…	13.6634	[8, 9]	GO biological process	[Group09]	5.32e-05
response to molecule of bacterial origin	GO:0002237	0.0269819	74	[ADRB2, AKIRIN2, AKT1, ALPL, ATP2A2, B2M, BCR, CARD16, CARD17, CASP1, CCL2, CD274, CD40, CD68, CHMP5, CMPK2, CSF2RB, CXCL10, CXCL11, CXCL9, DEF6, DUSP10, GALM, GCH1, GNRH1, HSP90AA1, ICAM1, IDO1, IL1B, IL1R1, IL1RN, IRAK2, JAK2, KMO, LGALS9, LILRB1, LILRB2, LY96, MAPK1, MRC1, MYD88, NFKB1, NFKBIA, NFKBIB, NOD2, NR1H2, P2RX7, PABPN1, PAF1, PDCD1LG2, PDE4B, PDE4D, PEX2, PRDX3, PTK2B, PYCARD, RELA, …	15.5462	[4, 6]	GO biological process	[Group08]	7.09e-05
cellular response to lipopolysaccharide	GO:0071222	5.57816e-05	56	[ADRB2, AKT1, BCR, CARD16, CARD17, CASP1, CCL2, CD274, CD40, CD68, CHMP5, CMPK2, CXCL10, CXCL11, CXCL9, DEF6, GALM, ICAM1, IL1B, IL1R1, IL1RN, IRAK2, KMO, LILRB1, LILRB2, LY96, MAPK1, MRC1, MYD88, NFKB1, NFKBIA, NFKBIB, NOD2, NR1H2, PABPN1, PAF1, PDCD1LG2, PDE4B, PDE4D, PEX2, PTK2B, PYCARD, RELA, RIPK2, SBNO2, SRC, STS, TGFB1, TICAM1, TLR5, TMED7-TICAM2, TNF, TNFAIP3, TRIM5, ZC3H12A, ZFP36]	20.2899	[5, 6, 8]	GO biological process	[Group08]	7.09e-05
MHC protein complex assembly	GO:0002396	0.00835411	6	[CALR, HLA-DMA, HLA-DMB, HLA-DRA, HLA-DRB1, TAPBP]	85.7143	[6]	GO biological process	[Group07]	4.73e-05
response to interferon-alpha	GO:0035455	0.00429427	11	[ADAR, BST2, EIF2AK2, GAS6, IFIT2, IFIT3, IFITM1, IFITM2, IFITM3, LAMP3, PYHIN1]	47.8261	[5]	GO biological process	[Group06]	2.63e-05
regulation of cellular catabolic process	GO:0031329	0.00895612	146	[ABCD1, ADRB2, AKIRIN2, AKT1, ANXA2, ANXA2P2, ATG16L1, ATM, ATP2B4, ATP6V0A1, ATP6V0D1, ATP6V1C1, ATP6V1E1, ATP6V1G1, CALCOCO2, CAPN1, CARD16, CDK5RAP3, CIRBP, CTSA, DAPK2, DCP1A, DNPEP, DRAM1, DTX3L, EDEM2, ELF4, EXOSC7, FBXL5, FBXW4, FOLR2, FYCO1, GLMN, GSK3A, GTPBP1, HDAC4, HERC1, HIF1A, HM13, HNRNPU, HSP90AA1, HSP90AB1, HSP90AB3P, HSPA1A, HSPA1B, HSPA8, HSPB1, IDH1, IFI16, IL1B, IMMP2L, IRS1,…	13.4935	[4, 5]	GO biological process	[Group05]	4.63e-05
G protein-coupled receptor signaling pathway	GO:0007186	0.0100932	100	[ADGRE5, ADGRG5, ADRB2, AGTRAP, AKAP13, AKAP5, AKT1, APPL2, ARHGEF1, ARHGEF11, ARHGEF18, ATP2B4, BCKDK, BICD1, C3, C3AR1, C5, CCL2, CCR2, CCRL2, CISH, CUL9, CXCL10, CXCL11, CXCL16, CXCL9, CXCR6, CYSLTR1, DGKD, DTNBP1, DYNLT1, F2RL2, FCN1, FFAR2, FGD2, FNTB, GNA15, GNG5, GNRH1, GPBAR1, GPR33, GPR52, GPR65, GPR84, GSK3A, HCAR2, HCAR3, HHEX, ITPR3, JAK2, LPAR1, LRRK2, NCSTN, NFE2L2, NLRP6, NMUR1, NP…	6.29327	[3, 4, 5]	GO biological process	[Group04]	4.71e-05
toll-like receptor 9 signaling pathway	GO:0034162	0.0314935	12	[ADRB2, EPG5, IRAK2, MYD88, PHF11, PIK3AP1, RSAD2, RTN4, TLR7, TLR8, TSC22D3, UNC93B1]	37.5	[7, 8, 9, 10, 11, 12]	GO biological process	[Group03]	4.98e-05
nucleotide-binding oligomerization domain containing 2 signaling pathway	GO:0070431	0.0229257	9	[GALM, HSP90AA1, HSPA1A, HSPA1B, NFKBIA, NOD2, RELA, RIPK2, TNFAIP3]	50	[6, 7, 8, 9, 10, 11, 12, 13]	GO biological process	[Group02]	7.22e-05
detoxification of inorganic compound	GO:0061687	0.0395169	9	[MT1A, MT1B, MT1F, MT1G, MT1H, MT1L, MT1X, MT2A, SLC30A1]	47.3684	[2, 5]	GO biological process	[Group01]	2.1e-05
pH reduction	GO:0045851	0.0288383	18	[ATP6V0A1, ATP6V0D1, ATP6V1C1, ATP6V1E1, ATP6V1F, ATP6V1G1, CLIC4, DMXL2, GPR89A, GPR89B, GRN, PPOX, RAB20, RAB39A, RAB7A, RBCK1, SLAMF8, TPP1]	28.125	[9]	GO biological process	[Group00]	6.07e-05

## Sheet: top 20 GO terms
	GO term	GO ID	GO term p value (Bonferroni step down corrected)	number of associated genes	associated genes	% of associated genes	GO levels	ontology source
1	response to interferon-gamma	GO:0034341	7.90003e-23	83	[ACTR3, AIF1, B2M, BST2, C19orf66, CALCOCO2, CAMK2D, CAMK2G, CASP1, CCL2, CD40, CDC42EP4, CEP250, CIITA, CUL9, CXCL16, ELF4, FCGR1A, FCGR1B, FCGR1CP, GBP1, GBP2, GBP4, GBP5, GBP6, GCH1, HLA-A, HLA-B, HLA-C, HLA-DPA1, HLA-DQB1, HLA-DQB2, HLA-DRA, HLA-DRB1, HLA-E, HLA-F, HLA-G, HLA-H, HSP90AB1, ICAM1, IFI30, IFITM1, IFITM2, IFITM3, IL12RB1, IRF1, IRF2, IRF7, IRF9, JAK1, JAK2, KYNU, LGALS9, MRC1, MT…	33.4677	[4, 5]	GO biological process
2	cytokine-mediated signaling pathway	GO:0019221	1.06145e-23	202	[ADAR, ADRB2, AIM2, AKT1, ANGPT1, ANXA2, APPL2, B2M, BRWD1, BST2, CAMK2D, CAMK2G, CAPZA1, CARD16, CASP1, CASP4, CCL2, CCM2, CCR2, CCRL2, CD40, CD74, CEACAM1, CIITA, CISH, CSF1, CSF2RB, CUL1, CUL9, CXCL10, CXCL11, CXCL9, CXCR6, EGR1, FAN1, FCER1G, FCGR1A, FCGR1B, FCGR1CP, FYN, GALM, GAS6, GBP1, GBP2, GRB2, HIF1A, HLA-A, HLA-B, HLA-C, HLA-DPA1, HLA-DQB1, HLA-DQB2, HLA-DRA, HLA-DRB1, HLA-E, HLA-F, H…	20.2202	[4, 5, 6]	GO biological process
3	interferon-gamma-mediated signaling pathway	GO:0060333	4.14239e-22	53	[B2M, CAMK2D, CAMK2G, CIITA, FCGR1A, FCGR1B, FCGR1CP, GBP1, GBP2, HLA-A, HLA-B, HLA-C, HLA-DPA1, HLA-DQB1, HLA-DQB2, HLA-DRA, HLA-DRB1, HLA-E, HLA-F, HLA-G, HLA-H, HSP90AB1, ICAM1, IFI30, IRF1, IRF2, IRF7, IRF9, JAK1, JAK2, MT2A, NLRC5, NMI, NR1H2, OAS1, OAS2, OAS3, OASL, PARP14, PARP9, PML, PRKCD, SOCS1, SOCS3, SP100, STAT1, TRIM21, TRIM25, TRIM26, TRIM34, TRIM38, TRIM5, TXK]	47.3214	[5, 6, 7]	GO biological process
4	cellular response to cytokine stimulus	GO:0071345	6.64609e-21	249	[ABCD4, ACTR3, ADAR, ADRB2, AIF1, AIM2, AKT1, ANGPT1, ANXA2, APPL2, B2M, BRWD1, BST2, CAMK2D, CAMK2G, CAPZA1, CARD16, CASP1, CASP4, CCL2, CCM2, CCR2, CCRL2, CD40, CD74, CDC42EP4, CEACAM1, CEP250, CIITA, CISH, CSF1, CSF2RB, CUL1, CUL9, CXCL10, CXCL11, CXCL9, CXCR6, EGR1, FAN1, FAS, FCER1G, FCGR1A, FCGR1B, FCGR1CP, FYN, GALM, GAS6, GBP1, GBP2, GBP3, GBP4, GBP5, GBP6, GRB2, GSK3A, HDAC4, HIF1A, HLA-…	17.7098	[5]	GO biological process
5	defense response to virus	GO:0051607	4.18204e-21	87	[ADAR, AIM2, APOBEC3B, APOBEC3D, APOBEC3F, APOBEC3G, BST2, C19orf66, CD40, CGAS, CXCL10, CXCL9, DDX17, DDX58, DDX60, DHX58, DTX3L, EIF2AK2, ERCC6, FAM111A, GBP1, GBP3, HERC5, HIF1A, IFI16, IFI44L, IFI6, IFIH1, IFIT1, IFIT2, IFIT3, IFIT5, IFITM1, IFITM2, IFITM3, IL10RB, IL12RB1, IL15, IL1B, IRF1, IRF2, IRF7, IRF9, ISG15, LILRB1, MICA, MICB, MX1, NLRC5, NT5C3A, OAS1, OAS2, OAS3, OASL, PARP9, PLSCR1…	30.7421	[3, 4, 5, 6]	GO biological process
6	response to type I interferon	GO:0034340	2.1482e-21	52	[ADAR, BST2, C19orf66, EGR1, GBP2, HIF1A, HLA-A, HLA-B, HLA-C, HLA-E, HLA-F, HLA-G, HLA-H, HSP90AB1, IFI35, IFI6, IFIT1, IFIT2, IFIT3, IFITM1, IFITM2, IFITM3, IP6K2, IRF1, IRF2, IRF7, IRF9, ISG15, JAK1, MX1, MYD88, NLRC5, OAS1, OAS2, OAS3, OASL, PPIP5K1, PSMB8, PTPN1, PTPN6, RNASEL, RSAD2, SAMHD1, SP100, STAT1, STAT2, TBK1, TRIM56, TRIM6, TYK2, XAF1, ZBP1]	46.8468	[4, 5]	GO biological process
7	response to virus	GO:0009615	2.35754e-19	103	[ACTA2, ADAR, AIM2, APOBEC3B, APOBEC3D, APOBEC3F, APOBEC3G, BANF1, BCL3, BST2, C19orf66, CCT5, CD40, CGAS, CREBZF, CXCL10, CXCL9, DDX17, DDX58, DDX60, DHX58, DTX3L, EIF2AK2, ERCC6, FAM111A, FOXP3, GBP1, GBP3, HERC5, HIF1A, HSPB1, IFI16, IFI44, IFI44L, IFI6, IFIH1, IFIT1, IFIT2, IFIT3, IFIT5, IFITM1, IFITM2, IFITM3, IL10RB, IL12RB1, IL15, IL1B, IRF1, IRF2, IRF7, IRF9, ISG15, LGALS9, LILRB1, MICA, …	26.2087	[3, 5]	GO biological process
8	type I interferon signaling pathway	GO:0060337	1.00364e-19	49	[ADAR, BST2, EGR1, GBP2, HLA-A, HLA-B, HLA-C, HLA-E, HLA-F, HLA-G, HLA-H, HSP90AB1, IFI35, IFI6, IFIT1, IFIT2, IFIT3, IFITM1, IFITM2, IFITM3, IP6K2, IRF1, IRF2, IRF7, IRF9, ISG15, JAK1, MX1, MYD88, NLRC5, OAS1, OAS2, OAS3, OASL, PPIP5K1, PSMB8, PTPN1, PTPN6, RNASEL, RSAD2, SAMHD1, SP100, STAT1, STAT2, TBK1, TRIM6, TYK2, XAF1, ZBP1]	46.2264	[5, 6, 7]	GO biological process
9	cellular response to interferon-gamma	GO:0071346	1.45579e-17	71	[ACTR3, AIF1, B2M, CAMK2D, CAMK2G, CASP1, CCL2, CDC42EP4, CEP250, CIITA, CUL9, FCGR1A, FCGR1B, FCGR1CP, GBP1, GBP2, GBP4, GBP5, GBP6, HLA-A, HLA-B, HLA-C, HLA-DPA1, HLA-DQB1, HLA-DQB2, HLA-DRA, HLA-DRB1, HLA-E, HLA-F, HLA-G, HLA-H, HSP90AB1, ICAM1, IFI30, IL12RB1, IRF1, IRF2, IRF7, IRF9, JAK1, JAK2, LGALS9, MRC1, MT2A, NLRC5, NMI, NR1H2, OAS1, OAS2, OAS3, OASL, PARP14, PARP9, PML, PRKCD, RAB12, R…	31.5556	[5, 6]	GO biological process
10	regulation of defense response	GO:0031347	5.51707e-15	178	[A2M, ABCD1, ADRB2, AIM2, ALPK1, APOBEC3F, APOBEC3G, APPL2, ATM, BCR, BRCA2, C1QTNF3, C3, CCM2, CCR2, CD209, CEACAM1, CGAS, CISH, CLEC6A, CST7, CTSB, CTSK, CTSL, CUL1, CUL9, DDX58, DDX60, DHX58, DTX3L, DUSP10, ELF4, EPG5, ERCC6, FANCA, FCER1G, FCN1, FEM1C, FFAR2, FOXP3, FYN, GALM, GBP5, GRN, HERC5, HLA-A, HLA-B, HLA-DRB1, HLA-E, HLA-F, HLA-G, HSP90AA1, HSP90AB1, HSPA1A, HSPA1B, HSPD1, IDO1, IFI16…	18.0527	[4, 5]	GO biological process
11	regulation of innate immune response	GO:0045088	2.54633e-14	122	[A2M, ADRB2, AIM2, ALPK1, APPL2, CD209, CEACAM1, CGAS, CLEC6A, CTSB, CTSK, CTSL, CUL1, DDX58, DDX60, DHX58, DUSP10, EPG5, FCER1G, FCN1, FFAR2, FYN, GALM, GBP5, GRN, HLA-A, HLA-B, HLA-E, HLA-F, HLA-G, HSP90AA1, HSP90AB1, HSPA1A, HSPA1B, HSPD1, IFI16, IFIH1, IRAK2, IRF1, IRF7, JAK1, JAK2, LGALS9, LILRB1, LY96, MICA, MICB, MUC1, MYD88, NCR1, NFKB1, NFKBIA, NLRC3, NLRC5, NLRP6, NMI, NOD1, NOD2, NR1H2…	20.9262	[4, 5, 6]	GO biological process
12	positive regulation of cytokine production	GO:0001819	5.37209e-12	118	[AIF1, AIM2, AKIRIN2, ANGPT1, B2M, BCL3, C1QTNF3, C3, C3AR1, C5, CAPG, CASP1, CCM2, CCR2, CD244, CD274, CD40, CD74, CGAS, CISH, CLEC5A, CLEC6A, CYBB, DDX58, DDX60, DHX58, EGR1, EIF2AK2, FCER1G, FCN1, FFAR2, FOXP3, GALM, GBP5, GLMN, GSDMD, HIF1A, HK1, HLA-A, HLA-DPA1, HLA-E, HLA-F, HLA-G, HSPA1A, HSPA1B, HSPB1, HSPD1, IDO1, IFI16, IFIH1, IL12RB1, IL15, IL17RC, IL1B, IL1R1, IL1RN, IRF1, IRF7, JAK2,…	19.8319	[3, 4, 5]	GO biological process
13	negative regulation of viral process	GO:0048525	9.02859e-11	41	[APOBEC3B, APOBEC3D, APOBEC3F, APOBEC3G, BANF1, BST2, C19orf66, CCNK, CHMP3, EIF2AK2, FAM111A, FCN1, IFI16, IFIT1, IFIT5, IFITM1, IFITM2, IFITM3, ISG15, MX1, OAS1, OAS3, OASL, PARP10, PLSCR1, PML, PPIP5K1, RNASEL, RSAD2, SRPK2, STAT1, TNF, TRIM14, TRIM21, TRIM25, TRIM26, TRIM5, TRIM6, ZC3H12A, ZC3HAV1, ZFP36]	34.4538	[3, 4, 5, 6]	GO biological process
14	negative regulation of viral life cycle	GO:1903901	2.02314e-11	38	[APOBEC3B, APOBEC3D, APOBEC3F, APOBEC3G, BANF1, BST2, C19orf66, CCNK, CHMP3, EIF2AK2, FAM111A, FCN1, IFI16, IFIT1, IFIT5, IFITM1, IFITM2, IFITM3, ISG15, MX1, OAS1, OAS3, OASL, PARP10, PLSCR1, PML, PPIP5K1, RNASEL, RSAD2, SRPK2, TNF, TRIM21, TRIM25, TRIM26, TRIM5, TRIM6, ZC3H12A, ZC3HAV1]	38	[4, 5, 6, 7]	GO biological process
15	positive regulation of immune response	GO:0050778	1.02783e-10	188	[A2M, ACTR3, ADRB2, AIM2, ALPK1, APPL2, B2M, BMX, BTN2A2, BTN3A1, C1QB, C2, C3, C3AR1, C5, CAPG, CCR2, CD209, CD247, CD274, CD38, CD40, CD59, CD74, CEACAM1, CFP, CGAS, CLEC6A, CTSB, CTSK, CTSL, CUL1, CXCL10, DDX58, DDX60, DHX58, DUSP3, EIF2B5, ELMO2, EPG5, FCER1G, FCGR1A, FCGR1B, FCGR1CP, FCN1, FCN2, FFAR2, FOXP3, FYB1, FYN, GALM, GBP1, GBP5, GPR33, GRB2, HK1, HLA-A, HLA-B, HLA-C, HLA-DMB, HLA-DP…	16.0821	[3, 4, 5]	GO biological process
16	negative regulation of viral genome replication	GO:0045071	1.02713e-10	31	[APOBEC3B, APOBEC3D, APOBEC3F, APOBEC3G, BANF1, BST2, C19orf66, CCNK, EIF2AK2, FAM111A, IFI16, IFIT1, IFIT5, IFITM1, IFITM2, IFITM3, ISG15, MX1, OAS1, OAS3, OASL, PARP10, PLSCR1, PPIP5K1, RNASEL, RSAD2, SRPK2, TNF, TRIM6, ZC3H12A, ZC3HAV1]	43.0556	[5, 6, 7, 8]	GO biological process
17	antigen processing and presentation of exogenous peptide antigen via MHC class I	GO:0042590	7.52154e-09	34	[B2M, CALR, CYBB, FCER1G, FCGR1A, FCGR1B, FCGR1CP, HLA-A, HLA-B, HLA-C, HLA-E, HLA-F, HLA-G, HLA-H, IFI30, NCF1, PDIA3, PSMA2, PSMA3, PSMA4, PSMA5, PSMA6, PSMB10, PSMB2, PSMB3, PSMB8, PSMB9, PSME1, PSME2, TAP1, TAP2, TAPBP, TNFRSF1A, VAMP3]	35.0515	[5]	GO biological process
18	cell surface receptor signaling pathway	GO:0007166	4.45291e-09	468	[ABAT, ACP2, ACTR1A, ACTR3, ADAR, ADGRE5, ADGRG5, ADRB2, AGAP2, AGO1, AGO4, AIM2, AKIRIN2, AKR1A1, AKT1, ANGPT1, ANXA2, ANXA3, ANXA4, APPL2, ARHGEF18, ASGR2, ATF3, ATM, ATP6V0A1, ATP6V0D1, ATP6V1C1, ATP6V1E1, ATP6V1F, ATP6V1G1, B2M, BAK1, BCL3, BCR, BMX, BRCA2, BRD7P3, BRD8, BRI3, BRWD1, BST2, BTN2A2, BTN3A1, C3, C3AR1, C5, CAMK2D, CAMK2G, CAPG, CAPN1, CAPZA1, CARD16, CASP1, CASP10, CASP4, CBY1, …	12.4601	[3, 4, 5]	GO biological process
19	I-kappaB kinase/NF-kappaB signaling	GO:0007249	3.3465e-09	77	[ADRB2, AKAP13, AKT1, ALPK1, ANGPT1, APOL2, APOL3, BCL3, BST2, CARD16, CASP1, CASP10, CD40, CD74, CLEC6A, FKBP1A, FYN, GALM, GPR89A, GPR89B, HLA-DRB1, HSPB1, IFIT5, IL1B, IL1R1, IL1RN, IRAK2, LGALS9, LPAR1, LTBR, LY96, MPRIP, MYD88, NAPSA, NEK6, NFKBIA, NKIRAS2, NLRC3, NLRP12, NLRP6, NOD1, NOD2, NUP62, PIM2, PPIP5K1, PTK2B, PYCARD, RBCK1, RELA, RELB, RIPK1, RIPK2, RORA, SECTM1, SHISA5, STAT1, STS…	21.813	[4, 5, 6]	GO biological process
20	defense response to other organism	GO:0098542	1.19046e-09	125	[ADAR, ADRB2, AIM2, ANXA3, APOBEC3B, APOBEC3D, APOBEC3F, APOBEC3G, ATG16L1, BATF2, BCL3, BST2, C19orf66, CALCOCO2, CD40, CFP, CGAS, CLEC6A, CXCL10, CXCL9, DDX17, DDX58, DDX60, DEF6, DHX58, DSE, DTX3L, EIF2AK2, ERCC6, FAM111A, FCER1G, FCN2, GALM, GBP1, GBP3, GBP6, GNLY, GRN, GSDMD, HERC5, HIF1A, HIST1H2BK, HLA-A, HLA-E, IFI16, IFI44L, IFI6, IFIH1, IFIT1, IFIT2, IFIT3, IFIT5, IFITM1, IFITM2, IFITM3…	17.9856	[3, 4, 5]	GO biological process
