# Supplementary material for: Mapping immune variation and var gene switching in naive hosts infected with Plasmodium falciparum
Source: eLife. 2021 Mar 2;10:e62800. doi: 10.7554/eLife.62800 (PMC7924948; doi:10.7554/eLife.62800)
Supplement: Supplementary file 5. — These data underpin the heatmap in Figure 2d. [file elife-62800-supp5.xlsx]

## Sheet: suppressor response
	ID	symbol	description	EntrezID	log FC	adj p
	TC04001077.hg.1	KCNIP4-IT1	KCNIP4 intronic transcript 1 (non-protein coding)	359822	0.661838	0.0382217
	TC6_dbb_hap3000175.hg.1	FKBPL	FK506 binding protein like	63943	0.543654	0.032597
	TC0X000914.hg.1	KLHL34	kelch-like family member 34	257240	0.500502	0.0469991
	TC03001445.hg.1	DUSP7	dual specificity phosphatase 7	1849	0.428849	0.0336876
	TC06000596.hg.1	SRF	serum response factor (c-fos serum response element-binding transcription factor)	6722	0.414652	0.0301952
	TC09000707.hg.1	DOLPP1	dolichyldiphosphatase 1	57171	0.387917	0.00940329
	TC17000096.hg.1	TMEM102	transmembrane protein 102	284114	0.369854	0.047426
	TC08000777.hg.1	LOC286094	uncharacterized LOC286094	286094	0.353191	0.0177759
	TC03000892.hg.1	SERPINI1	serpin peptidase inhibitor, clade I (neuroserpin), member 1	5274	0.338198	0.0229668
	TC19000190.hg.1	SMARCA4	SWI/SNF related, matrix associated, actin dependent regulator of chromatin, subfamily a, member 4	6597	0.336205	0.0336876
	TC02000168.hg.1	CAD	carbamoyl-phosphate synthetase 2, aspartate transcarbamylase, and dihydroorotase	790	0.322624	0.0325627
	TC16001313.hg.1	TLDC1	TBC/LysM-associated domain containing 1	57707	0.322138	0.046875
	TC19000257.hg.1	PKN1	protein kinase N1	5585	0.321896	0.0293157
	TC19001629.hg.1	FBXO46	F-box protein 46	23403	0.309903	0.0442468
	TC0X000743.hg.1	NSDHL	NAD(P) dependent steroid dehydrogenase-like	50814	0.304904	0.0466046
	TC11002071.hg.1	COA4	cytochrome c oxidase assembly factor 4 homolog (S. cerevisiae)	51287	-0.283786	0.0442468
	TC19002649.hg.1	ZNF701	zinc finger protein 701	55762	-0.306901	0.0353137
	TC19001807.hg.1	ZNF320	zinc finger protein 320	162967	-0.308652	0.0261852
	TC11001770.hg.1	OR7E5P	olfactory receptor, family 7, subfamily E, member 5 pseudogene	219445	-0.374083	0.0382335
	TC07001631.hg.1	MGC72080	MGC72080 pseudogene	389538	-0.375814	0.0131596
	TC11001330.hg.1	HBB	hemoglobin, beta	3043	-0.44525	0.0246412
	TC11001079.hg.1	CCDC84	coiled-coil domain containing 84	338657	-0.506353	0.0466046
	TC10001416.hg.1	AGAP5	ArfGAP with GTPase domain, ankyrin repeat and PH domain 5	729092	-0.533211	0.0418922
	TC02001177.hg.1	CASP8	caspase 8, apoptosis-related cysteine peptidase	841	-0.567836	0.0357408
	TC01002095.hg.1	CCNL2	cyclin L2	81669	-0.568858	0.0434889
	TC11000855.hg.1	RAB30-AS1	RAB30 antisense RNA 1 (head to head)	100506233	-0.650799	0.0301952
	TC03003373.hg.1	THUMPD3-AS1	THUMPD3 antisense RNA 1	440944	-0.68868	0.0393336
	TC11001411.hg.1	MTRNR2L8	MT-RNR2-like 8	100463486	-0.689659	0.0131596
	TC07000304.hg.1	LINC00525	long intergenic non-protein coding RNA 525	84847	-0.700234	0.0336876
	TC14000418.hg.1	SRSF5	serine/arginine-rich splicing factor 5	6430	-0.726378	0.038449
	TC19001677.hg.1	CARD8	caspase recruitment domain family, member 8	22900	-0.739111	0.0374525
	TC02002616.hg.1	ORMDL1	ORMDL sphingolipid biosynthesis regulator 1	94101	-0.746785	0.0383256
	TC03001937.hg.1	PA2G4P4	proliferation-associated 2G4 pseudogene 4	647033	-0.757706	0.00838298
	TC20000805.hg.1	RBM39	RNA binding motif protein 39	9584	-0.764283	0.0301952
	TC10001228.hg.1	AGAP4	ArfGAP with GTPase domain, ankyrin repeat and PH domain 4	119016	-0.768587	0.0388127
	TC13000861.hg.1	ARGLU1	arginine and glutamate rich 1	55082	-0.769169	0.0410645
	TC01002512.hg.1	CSF3R	colony stimulating factor 3 receptor (granulocyte)	1441	-0.781007	0.0469991
	TC01000917.hg.1	RNPC3	RNA-binding region (RNP1, RRM) containing 3	55599	-0.80806	0.0341907
	TC15002756.hg.1	GOLGA8A	golgin A8 family, member A	23015	-0.815334	0.046761
	TC22000791.hg.1	DDX17	DEAD (Asp-Glu-Ala-Asp) box helicase 17	10521	-0.816389	0.0123231
	TC22000245.hg.1	FBXO7	F-box protein 7	25793	-0.82018	0.0418922
	TC10002624.hg.1	CTGLF12P	centaurin, gamma-like family, member 12 pseudogene	414224	-0.822997	0.0393275
	TC12000295.hg.1	KIAA1551	KIAA1551	55196	-0.824024	0.0222849
	TC08000200.hg.1	BNIP3L	BCL2/adenovirus E1B 19kDa interacting protein 3-like	665	-0.825136	0.0135379
	TC16002103.hg.1	SMG1P2	SMG1 pseudogene 2	440354	-0.832519	0.0415338
	TC01001346.hg.1	MNDA	myeloid cell nuclear differentiation antigen	4332	-0.833035	0.0374525
	TC02000353.hg.1	AHSA2	AHA1, activator of heat shock 90kDa protein ATPase homolog 2 (yeast)	130872	-0.836079	0.0223601
	TC01005732.hg.1	CD58	CD58 molecule	965	-0.840081	0.049896
	TC05001540.hg.1	MTRNR2L2	MT-RNR2-like 2	100462981	-0.843727	0.0086167
	TC16002099.hg.1	SLC7A5P2	solute carrier family 7 (amino acid transporter light chain, L system), member 5 pseudogene 2	387254	-0.85782	0.042749
	TC05002125.hg.1	CLK4	CDC-like kinase 4	57396	-0.860532	0.0224503
	TC16002094.hg.1	SMG1P1	SMG1 pseudogene 1	641298	-0.86166	0.0425721
	TC11000631.hg.1	MALAT1	metastasis associated lung adenocarcinoma transcript 1 (non-protein coding)	378938	-0.871727	0.00845842
	TC08000180.hg.1	LOC254896	uncharacterized LOC254896	254896	-0.874104	0.0404761
	TC03001939.hg.1	CCNL1	cyclin L1	57018	-0.879857	0.0388127
	TC06004075.hg.1	LY6G5B	lymphocyte antigen 6 complex, locus G5B	58496	-0.906407	0.0177166
	TC16001230.hg.1	SMG1P7	SMG1 pseudogene 7	100506060	-0.913508	0.0301952
	TC16001394.hg.1	LINC00921	long intergenic non-protein coding RNA 921	283876	-0.960519	0.0223601
	TC06000361.hg.1	HCG27	HLA complex group 27 (non-protein coding)	253018	-1.03593	0.0353137
	TC03000093.hg.1	SH3BP5-AS1	SH3BP5 antisense RNA 1	100505696	-1.04145	0.0282549
	TC02004970.hg.1	MXD1	MAX dimerization protein 1	4084	-1.05537	0.0435619
	TC12000555.hg.1	USP15	ubiquitin specific peptidase 15	9958	-1.08405	0.0353137
	TC02002666.hg.1	CLK1	CDC-like kinase 1	1195	-1.10764	0.0135655
	TC01002374.hg.1	RSRP1	arginine/serine-rich protein 1	57035	-1.10796	0.0202867
	TC02000329.hg.1	TPTEP1	transmembrane phosphatase with tensin homology pseudogene 1	387590	-1.11113	0.038449
	TC04000487.hg.1	FAM13A-AS1	FAM13A antisense RNA 1	285512	-1.11321	0.039432
	TC02002120.hg.1	ANKRD36B	ankyrin repeat domain 36B	57730	-1.12052	0.0382695
	TC02001128.hg.1	NABP1	nucleic acid binding protein 1	64859	-1.14045	0.038449
	TC12001215.hg.1	CLEC7A	C-type lectin domain family 7, member A	64581	-1.15791	0.0291689
	TC02000589.hg.1	ANKRD36	ankyrin repeat domain 36	375248	-1.22436	0.0321875
	TC02001292.hg.1	CXCR2	chemokine (C-X-C motif) receptor 2	3579	-1.30478	0.0207997
	TC07001738.hg.1	NAMPT	nicotinamide phosphoribosyltransferase	10135	-1.31783	0.025023
	TC15000441.hg.1	AQP9	aquaporin 9	366	-1.36411	0.0301952
	TC01006247.hg.1	HNRNPU-AS1	HNRNPU antisense RNA 1	284702	-1.48003	0.0223601
	TC12001178.hg.1	CLEC4E	C-type lectin domain family 4, member E	26253	-1.5039	0.0498024
	TC01001619.hg.1	RGS18	regulator of G-protein signaling 18	64407	-1.58818	0.00938398
	TC04001282.hg.1	PPBP	pro-platelet basic protein (chemokine (C-X-C motif) ligand 7)	5473	-1.82676	0.0353137
