# Supplementary material for: Mapping immune variation and var gene switching in naive hosts infected with Plasmodium falciparum
Source: eLife. 2021 Mar 2;10:e62800. doi: 10.7554/eLife.62800 (PMC7924948; doi:10.7554/eLife.62800)
Supplement: Supplementary file 6. — There were no differentially expressed genes between these volunteers prior to infection (adj p<0.05). [file elife-62800-supp6.xlsx]

## Sheet: inflammatory versus suppressor
	ID	symbol	description	EntrezID	log FC	adj p
	TC10001497.hg.1	ANKRD22	ankyrin repeat domain 22	118932	4.2	0.00793
	TC04001305.hg.1	CXCL10	chemokine (C-X-C motif) ligand 10	3627	4.08	0.0188
	TC02000937.hg.1	TNFAIP6	tumor necrosis factor, alpha-induced protein 6	7130	3.61	0.00712
	TC01001172.hg.1	FCGR1A	Fc fragment of IgG, high affinity Ia, receptor (CD64)	2209	3.58	0.00364
	TC01001161.hg.1	FCGR1C	Fc fragment of IgG, high affinity Ic, receptor (CD64), pseudogene	100132417	3.48	0.00424
	TC01003057.hg.1	FCGR1B	Fc fragment of IgG, high affinity Ib, receptor (CD64)	2210	3.22	0.00406
	TC09000037.hg.1	CD274	CD274 molecule	29126	3.18	0.00712
	TC03001904.hg.1	P2RY14	purinergic receptor P2Y, G-protein coupled, 14	9934	3.15	0.00814
	TC11000467.hg.1	SERPING1	serpin peptidase inhibitor, clade G (C1 inhibitor), member 1	710	2.93	0.0212
	TC11003507.hg.1	CARD17	caspase recruitment domain family, member 17	440068	2.73	0.0306
	TC01002850.hg.1	GBP5	guanylate binding protein 5	115362	2.46	0.0197
	TC08000305.hg.1	IDO1	indoleamine 2,3-dioxygenase 1	3620	2.46	0.0351
	TC0X000141.hg.1	GK	glycerol kinase	2710	2.44	0.00364
	TC01002847.hg.1	GBP1	guanylate binding protein 1, interferon-inducible	2633	2.4	0.0187
	TC10000637.hg.1	IFIT3	interferon-induced protein with tetratricopeptide repeats 3	3437	2.32	0.0298
	TC19000788.hg.1	FPR2	formyl peptide receptor 2	2358	2.29	0.00345
	TC04001304.hg.1	CXCL9	chemokine (C-X-C motif) ligand 9	4283	2.24	0.0068
	TC17000813.hg.1	KCNJ2	potassium inwardly-rectifying channel, subfamily J, member 2	3759	2.21	0.00364
	TC19000470.hg.1	FFAR2	free fatty acid receptor 2	2867	2.2	0.00645
	TC18000477.hg.1	PSTPIP2	proline-serine-threonine phosphatase interacting protein 2	9050	2.17	0.0103
	TC01000836.hg.1	GBP1P1	guanylate binding protein 1, interferon-inducible pseudogene 1	400759	2.16	0.0171
	TC19001575.hg.1	CEACAM1	carcinoembryonic antigen-related cell adhesion molecule 1 (biliary glycoprotein)	634	2.13	0.0223
	TC11000310.hg.1	PRRG4	proline rich Gla (G-carboxyglutamic acid) 4 (transmembrane)	79056	2.12	0.00364
	TC02004514.hg.1	DDX11L2	DEAD/H (Asp-Glu-Ala-Asp/His) box helicase 11 like 2	84771	2.11	0.0246
	TC04000437.hg.1	ANXA3	annexin A3	306	2.08	0.017
	TC12001178.hg.1	CLEC4E	C-type lectin domain family 4, member E	26253	2.04	0.00859
	TC10000638.hg.1	IFIT1B	interferon-induced protein with tetratricopeptide repeats 1B	439996	1.98	0.0298
	TC01003383.hg.1	AIM2	absent in melanoma 2	9447	1.97	0.0176
	TC12002078.hg.1	HCAR2	hydroxycarboxylic acid receptor 2	338442	1.97	0.0101
	TC21000167.hg.1	KCNJ15	potassium inwardly-rectifying channel, subfamily J, member 15	3772	1.97	0.00712
	TC02001000.hg.1	DHRS9	dehydrogenase/reductase (SDR family) member 9	10170	1.89	0.00805
	TC12000309.hg.1	LRRK2	leucine-rich repeat kinase 2	120892	1.88	0.0059
	TC10001535.hg.1	MYOF	myoferlin	26509	1.84	0.0221
	TC10000636.hg.1	IFIT2	interferon-induced protein with tetratricopeptide repeats 2	3433	1.83	0.0225
	TC0X001077.hg.1	ALAS2	aminolevulinate, delta-, synthase 2	212	1.81	0.0235
	TC12002079.hg.1	HCAR3	hydroxycarboxylic acid receptor 3	8843	1.81	0.0267
	TC13000612.hg.1	EPSTI1	epithelial stromal interaction 1 (breast)	94240	1.79	0.0436
	TC07001606.hg.1	SAMD9L	sterile alpha motif domain containing 9-like	219285	1.78	0.035
	TC04002927.hg.1	GYPA	glycophorin A (MNS blood group)	2993	1.77	0.0332
	TC11003322.hg.1	CASP5	caspase 5, apoptosis-related cysteine peptidase	838	1.76	0.00814
	TC01006361.hg.1	GBP2	guanylate binding protein 2, interferon-inducible	2634	1.75	0.00724
	TC01000001.hg.1	DDX11L1	DEAD/H (Asp-Glu-Ala-Asp/His) box helicase 11 like 1	100287102	1.74	0.0295
	TC03000634.hg.1	PARP14	poly (ADP-ribose) polymerase family, member 14	54625	1.73	0.0263
	TC01001357.hg.1	SLAMF8	SLAM family member 8	56833	1.73	0.0298
	TC04000151.hg.1	LAP3	leucine aminopeptidase 3	51056	1.72	0.0394
	TC04001809.hg.1	ACSL1	acyl-CoA synthetase long-chain family member 1	2180	1.69	0.00736
	TC01002849.hg.1	GBP4	guanylate binding protein 4	115361	1.69	0.0401
	TC16000455.hg.1	LPCAT2	lysophosphatidylcholine acyltransferase 2	54947	1.69	0.00533
	TC22000191.hg.1	KREMEN1	kringle containing transmembrane protein 1	83999	1.68	0.0233
	TC03001705.hg.1	PARP9	poly (ADP-ribose) polymerase family, member 9	83666	1.68	0.012
	TC12000130.hg.1	CLEC4D	C-type lectin domain family 4, member D	338339	1.67	0.0183
	TC01000835.hg.1	GBP6	guanylate binding protein family, member 6	163351	1.63	0.0418
	TC15002056.hg.1	DDX11L9	DEAD/H (Asp-Glu-Ala-Asp/His) box helicase 11 like 9	100288486	1.62	0.0337
	TC02002219.hg.1	IL1B	interleukin 1, beta	3553	1.61	0.0113
	TC06004141.hg.1	SOD2	superoxide dismutase 2, mitochondrial	6648	1.59	0.00433
	TC04000581.hg.1	ALPK1	alpha-kinase 1	80216	1.58	0.00513
	TC10002196.hg.1	FAS	Fas cell surface death receptor	355	1.58	0.0068
	TC04001476.hg.1	TIFA	TRAF-interacting protein with forkhead-associated domain	92610	1.58	0.0298
	TC08001381.hg.1	CA1	carbonic anhydrase I	759	1.57	0.0297
	TC14001152.hg.1	GCH1	GTP cyclohydrolase 1	2643	1.57	0.0414
	TC01003638.hg.1	PTGS2	prostaglandin-endoperoxide synthase 2 (prostaglandin G/H synthase and cyclooxygenase)	5743	1.56	0.0152
	TC07000840.hg.1	TMEM140	transmembrane protein 140	55281	1.56	0.00377
	TC04000517.hg.1	DAPP1	dual adaptor of phosphotyrosine and 3-phosphoinositides	27071	1.55	0.00439
	TC15000441.hg.1	AQP9	aquaporin 9	366	1.53	0.00804
	TC08000487.hg.1	LY96	lymphocyte antigen 96	23643	1.53	0.00345
	TC07001761.hg.1	DOCK4	dedicator of cytokinesis 4	9732	1.52	0.0226
	TC09001278.hg.1	FRMD3	FERM domain containing 3	257019	1.52	0.031
	TC14001509.hg.1	WARS	tryptophanyl-tRNA synthetase	7453	1.52	0.0325
	TC06001673.hg.1	ETV7	ets variant 7	51513	1.5	0.0243
	TC03000846.hg.1	MME	membrane metallo-endopeptidase	4311	1.5	0.0283
	TC04001282.hg.1	PPBP	pro-platelet basic protein (chemokine (C-X-C motif) ligand 7)	5473	1.48	0.0244
	TC02001556.hg.1	MBOAT2	membrane bound O-acyltransferase domain containing 2	129642	1.47	0.0118
	TC02002624.hg.1	STAT1	signal transducer and activator of transcription 1, 91kDa	6772	1.47	0.02
	TC03000395.hg.1	PSMD6-AS2	PSMD6 antisense RNA 2	100507062	1.46	0.0218
	TC07001582.hg.1	STEAP4	STEAP family member 4	79689	1.46	0.029
	TC02000432.hg.1	DYSF	dysferlin	8291	1.45	0.00819
	TC22000224.hg.1	LIMK2	LIM domain kinase 2	3985	1.45	0.00819
	TC04001719.hg.1	DDX60L	DEAD (Asp-Glu-Ala-Asp) box polypeptide 60-like	91351	1.44	0.0214
	TC09000035.hg.1	JAK2	Janus kinase 2	3717	1.43	0.02
	TC03002006.hg.1	TNFSF10	tumor necrosis factor (ligand) superfamily, member 10	8743	1.43	0.0231
	TC03002096.hg.1	BCL6	B-cell CLL/lymphoma 6	604	1.42	0.00859
	TC22000702.hg.1	APOL2	apolipoprotein L, 2	23780	1.41	0.0145
	TC14000434.hg.1	LOC145474	uncharacterized LOC145474	145474	1.41	0.0152
	TC07000899.hg.1	MGAM	maltase-glucoamylase (alpha-glucosidase)	8972	1.41	0.0178
	TC06002263.hg.1	DYNLT1	dynein, light chain, Tctex-type 1	6993	1.4	0.0161
	TC07001738.hg.1	NAMPT	nicotinamide phosphoribosyltransferase	10135	1.4	0.00364
	TC06001574.hg.1	TAP1	transporter 1, ATP-binding cassette, sub-family B (MDR/TAP)	6890	1.4	0.0102
	TC19001787.hg.1	FPR1	formyl peptide receptor 1	2357	1.39	0.0071
	TC02001128.hg.1	NABP1	nucleic acid binding protein 1	64859	1.39	0.0152
	TC08000326.hg.1	POLB	polymerase (DNA directed), beta	5423	1.39	0.018
	TC08000188.hg.1	SLC25A37	solute carrier family 25 (mitochondrial iron transporter), member 37	51312	1.39	0.0492
	TC04002916.hg.1	TLR1	toll-like receptor 1	7096	1.37	0.00364
	TC02000978.hg.1	GCA	grancalcin, EF-hand calcium binding protein	25801	1.35	0.00563
	TC12000877.hg.1	TRAFD1	TRAF-type zinc finger domain containing 1	10906	1.35	0.0102
	TC01002287.hg.1	PADI2	peptidyl arginine deiminase, type II	11240	1.33	0.0382
	TC0X001624.hg.1	SAT1	spermidine/spermine N1-acetyltransferase 1	6303	1.33	0.00971
	TC11003505.hg.1	CASP1	caspase 1, apoptosis-related cysteine peptidase	834	1.32	0.0104
	TC16000660.hg.1	CRISPLD2	cysteine-rich secretory protein LCCL domain containing 2	83716	1.32	0.0122
	TC18000100.hg.1	RIOK3	RIO kinase 3	8780	1.32	0.039
	TC08000545.hg.1	RIPK2	receptor-interacting serine-threonine kinase 2	8767	1.32	0.02
	TC01003260.hg.1	S100A12	S100 calcium binding protein A12	6283	1.3	0.0484
	TC02000968.hg.1	TANK	TRAF family member-associated NFKB activator	10010	1.29	0.0206
	TC01002845.hg.1	GBP3	guanylate binding protein 3	2635	1.28	0.0405
	TC07002205.hg.1	SNX10	sorting nexin 10	29887	1.28	0.00364
	TC12000555.hg.1	USP15	ubiquitin specific peptidase 15	9958	1.27	0.00712
	TC03000254.hg.1	CCR3	chemokine (C-C motif) receptor 3	1232	1.26	0.0382
	TC02004815.hg.1	CXCR2P1	chemokine (C-X-C motif) receptor 2 pseudogene 1	3580	1.26	0.00971
	TC07001264.hg.1	NT5C3A	5'-nucleotidase, cytosolic IIIA	51251	1.26	0.0259
	TC04000775.hg.1	TLR2	toll-like receptor 2	7097	1.26	0.0068
	TC07000836.hg.1	BPGM	2,3-bisphosphoglycerate mutase	669	1.25	0.0332
	TC01001741.hg.1	CD46	CD46 molecule, complement regulatory protein	4179	1.25	0.00364
	TC11000499.hg.1	STX3	syntaxin 3	6809	1.23	0.0178
	TC07001779.hg.1	TFEC	transcription factor EC	22797	1.23	0.0418
	TC06000758.hg.1	SH3BGRL2	SH3 domain binding glutamate-rich protein like 2	83699	1.22	0.0171
	TC06001057.hg.1	STX11	syntaxin 11	8676	1.22	0.0145
	TC22000265.hg.1	APOL1	apolipoprotein L, 1	8542	1.21	0.0135
	TC10002542.hg.1	ZNF438	zinc finger protein 438	220929	1.21	0.00814
	TC11003506.hg.1	CARD16	caspase recruitment domain family, member 16	114769	1.2	0.0104
	TC16000939.hg.1	IGSF6	immunoglobulin superfamily, member 6	10261	1.2	0.0059
	TC0X000082.hg.1	REPS2	RALBP1 associated Eps domain containing 2	9185	1.2	0.0199
	TC06001153.hg.1	LOC729603	calcineurin-like EF-hand protein 1 pseudogene	729603	1.19	0.0393
	TC01002954.hg.1	SORT1	sortilin 1	6272	1.19	0.0124
	TC03001851.hg.1	XRN1	5'-3' exoribonuclease 1	54464	1.17	0.0297
	TC12000128.hg.1	CLEC6A	C-type lectin domain family 6, member A	93978	1.16	0.0343
	TC06000774.hg.1	CYB5R4	cytochrome b5 reductase 4	51167	1.16	0.00364
	TC15000580.hg.1	LACTB	lactamase, beta	114294	1.16	0.0218
	TC01001619.hg.1	RGS18	regulator of G-protein signaling 18	64407	1.16	0.00469
	TC09001293.hg.1	ZCCHC6	zinc finger, CCHC domain containing 6	79670	1.16	0.00804
	TC02002425.hg.1	NMI	N-myc (and STAT) interactor	9111	1.15	0.0212
	TC02001911.hg.1	PELI1	pellino E3 ubiquitin protein ligase 1	57162	1.15	0.00814
	TC04001383.hg.1	SNCA	synuclein, alpha (non A4 component of amyloid precursor)	6622	1.15	0.0387
	TC13000383.hg.1	TNFSF13B	tumor necrosis factor (ligand) superfamily, member 13b	10673	1.15	0.0191
	TC12001215.hg.1	CLEC7A	C-type lectin domain family 7, member A	64581	1.14	0.00962
	TC17001903.hg.1	ST6GALNAC2	ST6 (alpha-N-acetyl-neuraminyl-2,3-beta-galactosyl-1,3)-N-acetylgalactosaminide alpha-2,6-sialyltransferase 2	10610	1.14	0.0226
	TC12000793.hg.1	DRAM1	DNA-damage regulated autophagy modulator 1	55332	1.13	0.0225
	TC14000794.hg.1	TNFAIP2	tumor necrosis factor, alpha-induced protein 2	7127	1.13	0.0174
	TC12001208.hg.1	CLEC2B	C-type lectin domain family 2, member B	9976	1.12	0.02
	TC05001767.hg.1	IRF1	interferon regulatory factor 1	3659	1.12	0.0193
	TC02004970.hg.1	MXD1	MAX dimerization protein 1	4084	1.12	0.0279
	TC03001906.hg.1	P2RY13	purinergic receptor P2Y, G-protein coupled, 13	53829	1.12	0.00616
	TC20000582.hg.1	RNF24	ring finger protein 24	11237	1.12	0.0225
	TC03000632.hg.1	DTX3L	deltex 3 like, E3 ubiquitin ligase	151636	1.11	0.0218
	TC01003192.hg.1	HIST2H4B	histone cluster 2, H4b	554313	1.11	0.0295
	TC07002399.hg.1	NCF1B	neutrophil cytosolic factor 1B pseudogene	654816	1.11	0.00364
	TC11000117.hg.1	OR56B1	olfactory receptor, family 56, subfamily B, member 1	387748	1.11	0.0448
	TC06003854.hg.1	VNN3	vanin 3	55350	1.11	0.0418
	TC20000928.hg.1	B4GALT5	UDP-Gal:betaGlcNAc beta 1,4- galactosyltransferase, polypeptide 5	9334	1.1	0.00814
	TC01005732.hg.1	CD58	CD58 molecule	965	1.1	0.0103
	TC16000812.hg.1	MEFV	Mediterranean fever	4210	1.1	0.013
	TC0X000052.hg.1	TLR8	toll-like receptor 8	51311	1.1	0.00364
	TC0X002337.hg.1	ACSL4	acyl-CoA synthetase long-chain family member 4	2182	1.09	0.0068
	TC09000857.hg.1	FAM157B	family with sequence similarity 157, member B	100132403	1.09	0.0214
	TC02000720.hg.1	IL1RN	interleukin 1 receptor antagonist	3557	1.09	0.0429
	TC04001355.hg.1	WDFY3	WD repeat and FYVE domain containing 3	23001	1.08	0.0114
	TC09000139.hg.1	CHMP5	charged multivesicular body protein 5	51510	1.07	0.0259
	TC22000271.hg.1	CSF2RB	colony stimulating factor 2 receptor, beta, low-affinity (granulocyte-macrophage)	1439	1.07	0.0236
	TC04002103.hg.1	FAM13A-AS1	FAM13A antisense RNA 1	285512	1.07	0.0122
	TC16000494.hg.1	GPR97	G protein-coupled receptor 97	222487	1.07	0.0456
	TC05001604.hg.1	MCTP1	multiple C2 domains, transmembrane 1	79772	1.07	0.0242
	TC11002246.hg.1	CASP4	caspase 4, apoptosis-related cysteine peptidase	837	1.05	0.00744
	TC04001811.hg.1	LOC731424	uncharacterized LOC731424	731424	1.05	0.0279
	TC14001030.hg.1	BAZ1A	bromodomain adjacent to zinc finger domain, 1A	11177	1.04	0.0164
	TC15001441.hg.1	DMXL2	Dmx-like 2	23312	1.04	0.0378
	TC07001868.hg.1	LINC-PINT	long intergenic non-protein coding RNA, p53 induced transcript	378805	1.04	0.0263
	TC07001516.hg.1	NCF1C	neutrophil cytosolic factor 1C pseudogene	654817	1.04	0.00364
	TC14000968.hg.1	PSME2	proteasome (prosome, macropain) activator subunit 2 (PA28 beta)	5721	1.04	0.0307
	TC17001979.hg.1	SECTM1	secreted and transmembrane 1	6398	1.04	0.00983
	TC06003855.hg.1	VNN2	vanin 2	8875	1.04	0.0301
	TC04001706.hg.1	GK3P	glycerol kinase 3 pseudogene	2713	1.03	0.0068
	TC12001772.hg.1	LIN7A	lin-7 homolog A (C. elegans)	8825	1.03	0.00469
	TC01002072.hg.1	LOC100288069	uncharacterized LOC100288069	100288069	1.03	0.0205
	TC16001118.hg.1	LOC643802	u3 small nucleolar ribonucleoprotein protein MPP10-like	643802	1.03	0.00364
	TC17001716.hg.1	TRIM25	tripartite motif containing 25	7706	1.03	0.02
	TC15001719.hg.1	BCL2A1	BCL2-related protein A1	597	1.02	0.015
	TC17001226.hg.1	FOXO3B	forkhead box O3B pseudogene	2310	1.02	0.0457
	TC17000545.hg.1	IFI35	interferon-induced protein 35	3430	1.02	0.0433
	TC09001325.hg.1	NFIL3	nuclear factor, interleukin 3 regulated	4783	1.02	0.00626
	TC14000433.hg.1	SIPA1L1	signal-induced proliferation-associated 1 like 1	26037	1.02	0.00814
	TC01000860.hg.1	CCDC18	coiled-coil domain containing 18	343099	1.01	0.0309
	TC01006308.hg.1	FCGR3B	Fc fragment of IgG, low affinity IIIb, receptor (CD16b)	2215	1.01	0.0161
	TC05000967.hg.1	CPEB4	cytoplasmic polyadenylation element binding protein 4	80315	1	0.0294
	TC06000115.hg.1	FAM8A1	family with sequence similarity 8, member A1	51439	1	0.0225
	TC06000361.hg.1	HCG27	HLA complex group 27 (non-protein coding)	253018	1	0.015
	TC05000604.hg.1	LMNB1	lamin B1	4001	1	0.0225
	TC01000005.hg.1	LOC100132287	uncharacterized LOC100132287	100132287	1	0.0198
	TC01001346.hg.1	MNDA	myeloid cell nuclear differentiation antigen	4332	1	0.0053
	TC01001607.hg.1	PLA2G4A	phospholipase A2, group IVA (cytosolic, calcium-dependent)	5321	1	0.0243
	TC07000688.hg.1	PRKAR2B	protein kinase, cAMP-dependent, regulatory, type II, beta	5577	1	0.0196
	TC13001498.hg.1	DLEU2	deleted in lymphocytic leukemia 2 (non-protein coding)	8847	0.999	0.00814
	TC03001939.hg.1	CCNL1	cyclin L1	57018	0.996	0.0225
	TC07000509.hg.1	CD36	CD36 molecule (thrombospondin receptor)	948	0.982	0.0326
	TC07001452.hg.1	ERV3-1	endogenous retrovirus group 3, member 1	2086	0.982	0.0373
	TC22000270.hg.1	NCF4	neutrophil cytosolic factor 4, 40kDa	4689	0.981	0.0457
	TC07000459.hg.1	NCF1	neutrophil cytosolic factor 1	653361	0.977	0.00469
	TC09000990.hg.1	C9orf72	chromosome 9 open reading frame 72	203228	0.974	0.00453
	TC19000174.hg.1	ICAM1	intercellular adhesion molecule 1	3383	0.971	0.0253
	TC18000011.hg.1	SMCHD1	structural maintenance of chromosomes flexible hinge domain containing 1	23347	0.971	0.015
	TC01002053.hg.1	LOC729737	uncharacterized LOC729737	729737	0.968	0.0325
	TC05000343.hg.1	FCHO2	FCH domain only 2	115548	0.966	0.0118
	TC16001270.hg.1	MLKL	mixed lineage kinase domain-like	197259	0.964	0.0433
	TC08001288.hg.1	VCPIP1	valosin containing protein (p97)/p47 complex interacting protein 1	80124	0.962	0.024
	TC15002652.hg.1	ST20	suppressor of tumorigenicity 20	400410	0.96	0.0149
	TC02000398.hg.1	PLEK	pleckstrin	5341	0.957	0.0216
	TC19001593.hg.1	PLAUR	plasminogen activator, urokinase receptor	5329	0.953	0.0199
	TC10002943.hg.1	ENTPD1	ectonucleoside triphosphate diphosphohydrolase 1	953	0.95	0.00712
	TC08000151.hg.1	ATP6V1B2	ATPase, H+ transporting, lysosomal 56/58kDa, V1 subunit B2	526	0.949	0.0102
	TC15000731.hg.1	PSMA4	proteasome (prosome, macropain) subunit, alpha type, 4	5685	0.949	0.02
	TC04001650.hg.1	TMEM154	transmembrane protein 154	201799	0.948	0.00602
	TC13000552.hg.1	N4BP2L2-IT2	N4BPL2 intronic transcript 2 (non-protein coding)	116828	0.947	0.0473
	TC02002538.hg.1	CIR1	corepressor interacting with RBPJ, 1	9541	0.944	0.0104
	TC19000976.hg.1	LINC01002	long intergenic non-protein coding RNA 1002	399844	0.943	0.0465
	TC06002189.hg.1	PLAGL1	pleiomorphic adenoma gene-like 1	5325	0.934	0.0475
	TC03003371.hg.1	FAM157A	family with sequence similarity 157, member A	728262	0.933	0.0199
	TC04002917.hg.1	TLR6	toll-like receptor 6	10333	0.933	0.0103
	TC06004126.hg.1	TAP2	transporter 2, ATP-binding cassette, sub-family B (MDR/TAP)	6891	0.932	0.0187
	TC16000766.hg.1	MSRB1	methionine sulfoxide reductase B1	51734	0.928	0.0468
	TC15000364.hg.1	SQRDL	sulfide quinone reductase-like (yeast)	58472	0.925	0.0195
	TC17000979.hg.1	SCARF1	scavenger receptor class F, member 1	8578	0.92	0.0307
	TC19000885.hg.1	FCAR	Fc fragment of IgA, receptor for	2204	0.915	0.0196
	TC03001650.hg.1	ATG3	autophagy related 3	64422	0.911	0.0173
	TC09000483.hg.1	LOC441455	makorin ring finger protein 1 pseudogene	441455	0.906	0.0364
	TC01000099.hg.1	VAMP3	vesicle-associated membrane protein 3	9341	0.905	0.0335
	TC02000329.hg.1	TPTEP1	transmembrane phosphatase with tensin homology pseudogene 1	387590	0.904	0.0068
	TC19000676.hg.1	C5AR1	complement component 5a receptor 1	728	0.896	0.017
	TC01003605.hg.1	GLUL	glutamate-ammonia ligase	2752	0.891	0.0294
	TC08002590.hg.1	DOCK5	dedicator of cytokinesis 5	80005	0.89	0.0167
	TC04001540.hg.1	SCLT1	sodium channel and clathrin linker 1	132320	0.889	0.0143
	TC0X000575.hg.1	IL13RA1	interleukin 13 receptor, alpha 1	3597	0.886	0.00684
	TC09000601.hg.1	TLR4	toll-like receptor 4	7099	0.884	0.0199
	TC04000320.hg.1	TMEM165	transmembrane protein 165	55858	0.878	0.0265
	TC20001730.hg.1	C20orf24	chromosome 20 open reading frame 24	55969	0.877	0.0167
	TC12001027.hg.1	GLT1D1	glycosyltransferase 1 domain containing 1	144423	0.873	0.0188
	TC03001283.hg.1	TRANK1	tetratricopeptide repeat and ankyrin repeat containing 1	9881	0.873	0.0289
	TC03000630.hg.1	CSTA	cystatin A (stefin A)	1475	0.872	0.0219
	TC02002132.hg.1	MITD1	MIT, microtubule interacting and transport, domain containing 1	129531	0.872	0.0269
	TC06000120.hg.1	RNF144B	ring finger protein 144B	255488	0.872	0.0151
	TC17000727.hg.1	VMP1	vacuole membrane protein 1	81671	0.869	0.0102
	TC08000180.hg.1	LOC254896	uncharacterized LOC254896	254896	0.867	0.0343
	TC08001408.hg.1	TMEM55A	transmembrane protein 55A	55529	0.865	0.0124
	TC11003501.hg.1	LINC01001	long intergenic non-protein coding RNA 1001	100133161	0.863	0.0233
	TC12001842.hg.1	HAL	histidine ammonia-lyase	3034	0.861	0.042
	TC06001717.hg.1	TREM1	triggering receptor expressed on myeloid cells 1	54210	0.86	0.0368
	TC16000384.hg.1	ZNF267	zinc finger protein 267	10308	0.86	0.0154
	TC18000402.hg.1	ABHD3	abhydrolase domain containing 3	171586	0.858	0.0296
	TC14001124.hg.1	PYGL	phosphorylase, glycogen, liver	5836	0.858	0.0456
	TC01002374.hg.1	RSRP1	arginine/serine-rich protein 1	57035	0.858	0.0212
	TC04000442.hg.1	LINC00989	long intergenic non-protein coding RNA 989	100506035	0.856	0.0359
	TC13001723.hg.1	N4BP2L2	NEDD4 binding protein 2-like 2	10443	0.854	0.0233
	TC11000483.hg.1	FAM111A	family with sequence similarity 111, member A	63901	0.852	0.0255
	TC08000793.hg.1	DENND3	DENN/MADD domain containing 3	22898	0.85	0.0138
	TC11001795.hg.1	UBE2L6	ubiquitin-conjugating enzyme E2L 6	9246	0.85	0.0266
	TC01003551.hg.1	RFWD2	ring finger and WD repeat domain 2, E3 ubiquitin protein ligase	64326	0.849	0.0068
	TC17001761.hg.1	USP32	ubiquitin specific peptidase 32	84669	0.849	0.00814
	TC12000119.hg.1	CLEC4A	C-type lectin domain family 4, member A	50856	0.848	0.0191
	TC17000309.hg.1	WSB1	WD repeat and SOCS box containing 1	26118	0.848	0.0457
	TC06001347.hg.1	HIST1H2BC	histone cluster 1, H2bc	8347	0.846	0.0146
	TC05000659.hg.1	UBE2B	ubiquitin-conjugating enzyme E2B	7320	0.844	0.0104
	TC20001743.hg.1	SIRPB2	signal-regulatory protein beta 2	284759	0.843	0.0209
	TC0X001707.hg.1	H3F3AP5	H3 histone, family 3A, pseudogene 5	347376	0.84	0.00364
	TC17000349.hg.1	CPD	carboxypeptidase D	1362	0.834	0.0183
	TC04001501.hg.1	LINC01061	long intergenic non-protein coding RNA 1061	401149	0.832	0.0178
	TC02001086.hg.1	SSFA2	sperm specific antigen 2	6744	0.832	0.0398
	TC01000831.hg.1	PKN2	protein kinase N2	5586	0.831	0.0131
	TC01003616.hg.1	NCF2	neutrophil cytosolic factor 2	4688	0.828	0.00891
	TC02000535.hg.1	LINC00152	long intergenic non-protein coding RNA 152	112597	0.825	0.0454
	TC01002478.hg.1	RNF19B	ring finger protein 19B	127544	0.825	0.0225
	TC01001622.hg.1	RGS1	regulator of G-protein signaling 1	5996	0.823	0.0225
	TC18000189.hg.1	RAB27B	RAB27B, member RAS oncogene family	5874	0.819	0.0196
	TC04002929.hg.1	BST1	bone marrow stromal cell antigen 1	683	0.817	0.0169
	TC06004082.hg.1	PSMB9	proteasome (prosome, macropain) subunit, beta type, 9	5698	0.817	0.0322
	TC02002614.hg.1	SLC40A1	solute carrier family 40 (iron-regulated transporter), member 1	30061	0.817	0.02
	TC10000360.hg.1	UBE2D1	ubiquitin-conjugating enzyme E2D 1	7321	0.817	0.0225
	TC11001309.hg.1	TRIM21	tripartite motif containing 21	6737	0.814	0.0225
	TC07000723.hg.1	CAPZA2	capping protein (actin filament) muscle Z-line, alpha 2	830	0.813	0.00814
	TC01002512.hg.1	CSF3R	colony stimulating factor 3 receptor (granulocyte)	1441	0.813	0.0367
	TC02002853.hg.1	SP110	SP110 nuclear body protein	3431	0.812	0.0279
	TC17001342.hg.1	EVI2A	ecotropic viral integration site 2A	2123	0.811	0.02
	TC12001269.hg.1	PLBD1	phospholipase B domain containing 1	79887	0.81	0.0266
	TC11000957.hg.1	BIRC2	baculoviral IAP repeat containing 2	329	0.809	0.0387
	TC01003261.hg.1	S100A8	S100 calcium binding protein A8	6279	0.809	0.0199
	TC02000894.hg.1	SPOPL	speckle-type POZ protein-like	339745	0.805	0.0199
	TC11002977.hg.1	LINC01001	long intergenic non-protein coding RNA 1001	100133161	0.804	0.0355
	TC20000468.hg.1	TUBB1	tubulin, beta 1 class VI	81027	0.804	0.0328
	TC22000700.hg.1	APOL3	apolipoprotein L, 3	80833	0.801	0.0273
	TC06001573.hg.1	PSMB8	proteasome (prosome, macropain) subunit, beta type, 8	5696	0.801	0.00814
	TC01001399.hg.1	FCGR2A	Fc fragment of IgG, low affinity IIa, receptor (CD32)	2212	0.799	0.0058
	TC10000415.hg.1	SRGN	serglycin	5552	0.798	0.00544
	TC01004036.hg.1	LINC01347	long intergenic non-protein coding RNA 1347	731275	0.795	0.0246
	TC02005063.hg.1	BAZ2B	bromodomain adjacent to zinc finger domain, 2B	29994	0.79	0.0267
	TC0X000066.hg.1	MOSPD2	motile sperm domain containing 2	158747	0.79	0.0193
	TC21000651.hg.1	BACH1	BTB and CNC homology 1, basic leucine zipper transcription factor 1	571	0.789	0.00814
	TC02001174.hg.1	CFLAR	CASP8 and FADD-like apoptosis regulator	8837	0.789	0.00863
	TC10001626.hg.1	NT5C2	5'-nucleotidase, cytosolic II	22978	0.784	0.011
	TC04001137.hg.1	RBM47	RNA binding motif protein 47	54502	0.775	0.00814
	TC19000585.hg.1	CEACAM3	carcinoembryonic antigen-related cell adhesion molecule 3	1084	0.773	0.0446
	TC20000553.hg.1	SIRPD	signal-regulatory protein delta	128646	0.77	0.00814
	TC14001917.hg.1	LINC00641	long intergenic non-protein coding RNA 641	283624	0.767	0.0183
	TC07001217.hg.1	SKAP2	src kinase associated phosphoprotein 2	8935	0.767	0.0254
	TC03001907.hg.1	P2RY12	purinergic receptor P2Y, G-protein coupled, 12	64805	0.766	0.0321
	TC09001571.hg.1	DENND1A	DENN/MADD domain containing 1A	57706	0.765	0.011
	TC06000581.hg.1	UBR2	ubiquitin protein ligase E3 component n-recognin 2	23304	0.765	0.00712
	TC6_dbb_hap3000114.hg.1	IFITM4P	interferon induced transmembrane protein 4 pseudogene	340198	0.764	0.0247
	TC09000308.hg.1	CBWD3	COBW domain containing 3	445571	0.762	0.0415
	TC12000276.hg.1	FAR2	fatty acyl CoA reductase 2	55711	0.761	0.0145
	TC09001537.hg.1	MEGF9	multiple EGF-like-domains 9	1955	0.76	0.0267
	TC09000571.hg.1	SLC31A2	solute carrier family 31 (copper transporter), member 2	1318	0.755	0.0313
	TC11000208.hg.1	FAR1	fatty acyl CoA reductase 1	84188	0.754	0.00814
	TC01001581.hg.1	NPL	N-acetylneuraminate pyruvate lyase (dihydrodipicolinate synthase)	80896	0.749	0.0246
	TC08000200.hg.1	BNIP3L	BCL2/adenovirus E1B 19kDa interacting protein 3-like	665	0.748	0.0484
	TC03000231.hg.1	ABHD5	abhydrolase domain containing 5	51099	0.747	0.0226
	TC01003607.hg.1	RNASEL	ribonuclease L (2',5'-oligoisoadenylate synthetase-dependent)	6041	0.746	0.023
	TC10001499.hg.1	FAS-AS1	FAS antisense RNA 1	100302740	0.744	0.0225
	TC02002577.hg.1	SESTD1	SEC14 and spectrin domains 1	91404	0.742	0.0428
	TC11001407.hg.1	SBF2	SET binding factor 2	81846	0.739	0.02
	TC10001559.hg.1	PIK3AP1	phosphoinositide-3-kinase adaptor protein 1	118788	0.736	0.04
	TC0X000939.hg.1	CXorf21	chromosome X open reading frame 21	80231	0.734	0.0305
	TC08000531.hg.1	CA2	carbonic anhydrase II	760	0.733	0.0267
	TC08001887.hg.1	ADAM9	ADAM metallopeptidase domain 9	8754	0.73	0.0439
	TC03002038.hg.1	GNB4	guanine nucleotide binding protein (G protein), beta polypeptide 4	59345	0.73	0.0468
	TC01001463.hg.1	DCAF6	DDB1 and CUL4 associated factor 6	55827	0.729	0.0336
	TC18000047.hg.1	RAB31	RAB31, member RAS oncogene family	11031	0.726	0.0297
	TC05001638.hg.1	ST8SIA4	ST8 alpha-N-acetyl-neuraminide alpha-2,8-sialyltransferase 4	7903	0.726	0.0104
	TC13000109.hg.1	FRY	furry homolog (Drosophila)	10129	0.724	0.00971
	TC08000403.hg.1	SDCBP	syndecan binding protein (syntenin)	6386	0.723	0.00804
	TC14000914.hg.1	LINC00641	long intergenic non-protein coding RNA 641	283624	0.722	0.031
	TC03000963.hg.1	TTC14	tetratricopeptide repeat domain 14	151613	0.722	0.0457
	TC15000362.hg.1	BLOC1S6	biogenesis of lysosomal organelles complex-1, subunit 6, pallidin	26258	0.721	0.0297
	TC19001677.hg.1	CARD8	caspase recruitment domain family, member 8	22900	0.721	0.00406
	TC07001016.hg.1	NUB1	negative regulator of ubiquitin-like proteins 1	51667	0.721	0.0389
	TC08000591.hg.1	CPQ	carboxypeptidase Q	10404	0.71	0.0087
	TC10000661.hg.1	EXOC6	exocyst complex component 6	54536	0.71	0.013
	TC11000544.hg.1	BEST1	bestrophin 1	7439	0.709	0.0243
	TC09000463.hg.1	HIATL1	hippocampus abundant transcript-like 1	84641	0.705	0.0385
	TC08000402.hg.1	UBXN2B	UBX domain protein 2B	137886	0.705	0.0103
	TC01002819.hg.1	CTBS	chitobiase, di-N-acetyl-	1486	0.702	0.0178
	TC04001057.hg.1	FBXL5	F-box and leucine-rich repeat protein 5	26234	0.697	0.0199
	TC12001636.hg.1	AVIL	advillin	10677	0.695	0.0207
	TC01002320.hg.1	EIF4G3	eukaryotic translation initiation factor 4 gamma, 3	8672	0.694	0.0418
	TC11002168.hg.1	OR7E2P	olfactory receptor, family 7, subfamily E, member 2 pseudogene	8587	0.694	0.0204
	TC11002123.hg.1	PAK1	p21 protein (Cdc42/Rac)-activated kinase 1	5058	0.694	0.0281
	TC20001753.hg.1	ATP5E	ATP synthase, H+ transporting, mitochondrial F1 complex, epsilon subunit	514	0.693	0.0281
	TC06001298.hg.1	KIF13A	kinesin family member 13A	63971	0.692	0.0239
	TC02000284.hg.1	RHOQ	ras homolog family member Q	23433	0.689	0.0138
	TC08002587.hg.1	UBE2W	ubiquitin-conjugating enzyme E2W (putative)	55284	0.688	0.0162
	TC03000583.hg.1	ATP6V1A	ATPase, H+ transporting, lysosomal 70kDa, V1 subunit A	523	0.687	0.00712
	TC17000631.hg.1	CALCOCO2	calcium binding and coiled-coil domain 2	10241	0.687	0.0221
	TC11001341.hg.1	TRIM5	tripartite motif containing 5	85363	0.687	0.0433
	TC02000046.hg.1	ASAP2	ArfGAP with SH3 domain, ankyrin repeat and PH domain 2	8853	0.686	0.0231
	TC10000836.hg.1	FAM160B1	family with sequence similarity 160, member B1	57700	0.685	0.0245
	TC05000398.hg.1	ZFYVE16	zinc finger, FYVE domain containing 16	9765	0.681	0.0225
	TC04002690.hg.1	LINC01061	long intergenic non-protein coding RNA 1061	401149	0.68	0.0291
	TC11002136.hg.1	GAB2	GRB2-associated binding protein 2	9846	0.678	0.0145
	TC03000926.hg.1	FNDC3B	fibronectin type III domain containing 3B	64778	0.676	0.0173
	TC13000091.hg.1	POMP	proteasome maturation protein	51371	0.668	0.0307
	TC05001294.hg.1	RICTOR	RPTOR independent companion of MTOR, complex 2	253260	0.668	0.015
	TC20000402.hg.1	LINC01270	long intergenic non-protein coding RNA 1270	284751	0.666	0.0483
	TC03003320.hg.1	NFKBIZ	nuclear factor of kappa light polypeptide gene enhancer in B-cells inhibitor, zeta	64332	0.666	0.0321
	TC0X001325.hg.1	LAMP2	lysosomal-associated membrane protein 2	3920	0.665	0.0164
	TC01000721.hg.1	DLEU2L	deleted in lymphocytic leukemia 2-like	79469	0.663	0.0279
	TC06001273.hg.1	NEDD9	neural precursor cell expressed, developmentally down-regulated 9	4739	0.662	0.0193
	TC12000765.hg.1	APAF1	apoptotic peptidase activating factor 1	317	0.66	0.0204
	TC01001498.hg.1	DNM3	dynamin 3	26052	0.658	0.0301
	TC01002903.hg.1	DPYD	dihydropyrimidine dehydrogenase	1806	0.657	0.0243
	TC17001341.hg.1	EVI2B	ecotropic viral integration site 2B	2124	0.654	0.0147
	TC06000844.hg.1	PRDM1	PR domain containing 1, with ZNF domain	639	0.654	0.02
	TC15001596.hg.1	ANP32A-IT1	ANP32A intronic transcript 1 (non-protein coding)	80035	0.653	0.0167
	TC01005104.hg.1	TSNAX-DISC1	TSNAX-DISC1 readthrough (NMD candidate)	100303453	0.653	0.0448
	TC20000391.hg.1	SLC9A8	solute carrier family 9, subfamily A (NHE8, cation proton antiporter 8), member 8	23315	0.652	0.0071
	TC05002125.hg.1	CLK4	CDC-like kinase 4	57396	0.651	0.0259
	TC17001029.hg.1	CXCL16	chemokine (C-X-C motif) ligand 16	58191	0.651	0.0257
	TC07003097.hg.1	LINC01004	long intergenic non-protein coding RNA 1004	100216546	0.651	0.0499
	TC09000316.hg.1	PIP5K1B	phosphatidylinositol-4-phosphate 5-kinase, type I, beta	8395	0.647	0.0405
	TC08000547.hg.1	DECR1	2,4-dienoyl CoA reductase 1, mitochondrial	1666	0.645	0.0257
	TC17000373.hg.1	RHOT1	ras homolog family member T1	55288	0.643	0.0454
	TC01003968.hg.1	EGLN1	egl-9 family hypoxia-inducible factor 1	54583	0.642	0.0225
	TC14001288.hg.1	NUMB	numb homolog (Drosophila)	8650	0.641	0.00819
	TC07003314.hg.1	PILRA	paired immunoglobin-like type 2 receptor alpha	29992	0.641	0.0232
	TC04000699.hg.1	GAB1	GRB2-associated binding protein 1	2549	0.64	0.0199
	TC11002245.hg.1	LOC643733	caspase 4, apoptosis-related cysteine peptidase pseudogene	643733	0.64	0.0224
	TC05000958.hg.1	CREBRF	CREB3 regulatory factor	153222	0.637	0.028
	TC01000733.hg.1	PDE4B	phosphodiesterase 4B, cAMP-specific	5142	0.631	0.0319
	TC10000257.hg.1	LINC00999	long intergenic non-protein coding RNA 999	399744	0.63	0.0359
	TC08000383.hg.1	LYN	LYN proto-oncogene, Src family tyrosine kinase	4067	0.627	0.0112
	TC06000189.hg.1	BTN2A1	butyrophilin, subfamily 2, member A1	11120	0.625	0.00859
	TC05000636.hg.1	C5orf56	chromosome 5 open reading frame 56	441108	0.625	0.0428
	TC04000439.hg.1	LINC01094	long intergenic non-protein coding RNA 1094	100505702	0.625	0.0199
	TC09001473.hg.1	TXN	thioredoxin	7295	0.624	0.0273
	TC10001641.hg.1	ITPRIP	inositol 1,4,5-trisphosphate receptor interacting protein	85450	0.621	0.0226
	TC10001394.hg.1	MICU1	mitochondrial calcium uptake 1	10367	0.621	0.0161
	TC12000730.hg.1	PLXNC1	plexin C1	10154	0.621	0.0173
	TC22000701.hg.1	APOL4	apolipoprotein L, 4	80832	0.619	0.0446
	TC04000577.hg.1	C4orf32	chromosome 4 open reading frame 32	132720	0.619	0.015
	TC07000178.hg.1	CREB5	cAMP responsive element binding protein 5	9586	0.619	0.0305
	TC08000768.hg.1	PHF20L1	PHD finger protein 20-like 1	51105	0.619	0.0415
	TC11001941.hg.1	AP5B1	adaptor-related protein complex 5, beta 1 subunit	91056	0.618	0.0455
	TC05001393.hg.1	ELOVL7	ELOVL fatty acid elongase 7	79993	0.618	0.0389
	TC02002432.hg.1	STAM2	signal transducing adaptor molecule (SH3 domain and ITAM motif) 2	10254	0.618	0.0387
	TC14000417.hg.1	KIAA0247	KIAA0247	9766	0.616	0.0224
	TC04001805.hg.1	IRF2	interferon regulatory factor 2	3660	0.614	0.0179
	TC0X000921.hg.1	ACOT9	acyl-CoA thioesterase 9	23597	0.613	0.0448
	TC01001857.hg.1	H3F3A	H3 histone, family 3A	3020	0.613	0.0091
	TC01003498.hg.1	F5	coagulation factor V (proaccelerin, labile factor)	2153	0.612	0.0245
	TC13000411.hg.1	ATP11A	ATPase, class VI, type 11A	23250	0.608	0.0266
	TC05000186.hg.1	CARD6	caspase recruitment domain family, member 6	84674	0.608	0.038
	TC03000111.hg.1	RAB5A	RAB5A, member RAS oncogene family	5868	0.606	0.0243
	TC17001700.hg.1	SPAG9	sperm associated antigen 9	9043	0.604	0.0202
	TC09000202.hg.1	GLIPR2	GLI pathogenesis-related 2	152007	0.6	0.0269
	TC0X000006.hg.1	CSF2RA	colony stimulating factor 2 receptor, alpha, low-affinity (granulocyte-macrophage)	1438	0.599	0.0358
	TC08001641.hg.1	ASAP1	ArfGAP with SH3 domain, ankyrin repeat and PH domain 1	50807	0.598	0.02
	TC12000297.hg.1	FGD4	FYVE, RhoGEF and PH domain containing 4	121512	0.596	0.0267
	TC07000556.hg.1	GNG11	guanine nucleotide binding protein (G protein), gamma 11	2791	0.596	0.0171
	TC04000826.hg.1	KLHL2	kelch-like family member 2	11275	0.593	0.0447
	TC10000145.hg.1	PLXDC2	plexin domain containing 2	84898	0.593	0.0336
	TC08001464.hg.1	STK3	serine/threonine kinase 3	6788	0.592	0.0183
	TC21000129.hg.1	IFNGR2	interferon gamma receptor 2 (interferon gamma transducer 1)	3460	0.59	0.00683
	TC01006307.hg.1	FCGR3A	Fc fragment of IgG, low affinity IIIa, receptor (CD16a)	2214	0.588	0.0149
	TC05000782.hg.1	ARHGAP26	Rho GTPase activating protein 26	23092	0.587	0.00712
	TC02000366.hg.1	LGALSL	lectin, galactoside-binding-like	29094	0.586	0.00814
	TC03000809.hg.1	RNF13	ring finger protein 13	11342	0.584	0.0122
	TC06001313.hg.1	MBOAT1	membrane bound O-acyltransferase domain containing 1	154141	0.583	0.00814
	TC03000714.hg.1	ACPP	acid phosphatase, prostate	55	0.582	0.0195
	TC04000470.hg.1	AFF1	AF4/FMR2 family, member 1	4299	0.58	0.0403
	TC20000685.hg.1	RALGAPA2	Ral GTPase activating protein, alpha subunit 2 (catalytic)	57186	0.578	0.0335
	TC02002606.hg.1	TFPI	tissue factor pathway inhibitor (lipoprotein-associated coagulation inhibitor)	7035	0.575	0.0298
	TC16000918.hg.1	GDE1	glycerophosphodiester phosphodiesterase 1	51573	0.572	0.0287
	TC11002344.hg.1	AMICA1	adhesion molecule, interacts with CXADR antigen 1	120425	0.566	0.0471
	TC17002899.hg.1	LOC440434	aminopeptidase puromycin sensitive pseudogene	440434	0.565	0.0367
	TC17001531.hg.1	STAT3	signal transducer and activator of transcription 3 (acute-phase response factor)	6774	0.564	0.0268
	TC11000027.hg.1	TALDO1	transaldolase 1	6888	0.564	0.0306
	TC02004325.hg.1	PCBP1-AS1	PCBP1 antisense RNA 1	400960	0.56	0.0199
	TC01003996.hg.1	LYST	lysosomal trafficking regulator	1130	0.559	0.0225
	TC01003191.hg.1	HIST2H2BC	histone cluster 2, H2bc (pseudogene)	337873	0.558	0.0191
	TC07001169.hg.1	SNX13	sorting nexin 13	23161	0.557	0.0243
	TC12000854.hg.1	ANKRD13A	ankyrin repeat domain 13A	88455	0.555	0.00364
	TC08000720.hg.1	FAM91A1	family with sequence similarity 91, member A1	157769	0.555	0.0298
	TC12001079.hg.1	SLC6A12	solute carrier family 6 (neurotransmitter transporter), member 12	6539	0.554	0.0297
	TC04000542.hg.1	TET2	tet methylcytosine dioxygenase 2	54790	0.552	0.00712
	TC08001644.hg.1	ASAP1-IT1	ASAP1 intronic transcript 1 (non-protein coding)	29065	0.551	0.0297
	TC06002062.hg.1	MAN1A1	mannosidase, alpha, class 1A, member 1	4121	0.551	0.0382
	TC12003210.hg.1	ETV6	ets variant 6	2120	0.55	0.0243
	TC0X000222.hg.1	RP2	retinitis pigmentosa 2 (X-linked recessive)	6102	0.549	0.0263
	TC11003442.hg.1	TRIM34	tripartite motif containing 34	53840	0.541	0.0354
	TC10001709.hg.1	WDR11-AS1	WDR11 antisense RNA 1	283089	0.539	0.0271
	TC02001171.hg.1	NDUFB3	NADH dehydrogenase (ubiquinone) 1 beta subcomplex, 3, 12kDa	4709	0.534	0.0225
	TC08001496.hg.1	RRM2B	ribonucleotide reductase M2 B (TP53 inducible)	50484	0.534	0.0455
	TC03001270.hg.1	CMTM6	CKLF-like MARVEL transmembrane domain containing 6	54918	0.532	0.0286
	TC05001295.hg.1	FYB	FYN binding protein	2533	0.532	0.0338
	TC16002071.hg.1	MVP	major vault protein	9961	0.532	0.0281
	TC11001397.hg.1	DENND5A	DENN/MADD domain containing 5A	23258	0.53	0.0254
	TC06003493.hg.1	DTNBP1	dystrobrevin binding protein 1	84062	0.529	0.0394
	TC03001976.hg.1	PDCD10	programmed cell death 10	11235	0.529	0.0389
	TC01000730.hg.1	LEPR	leptin receptor	3953	0.528	0.0478
	TC06002114.hg.1	STX7	syntaxin 7	8417	0.528	0.0355
	TC02001769.hg.1	SLC8A1	solute carrier family 8 (sodium/calcium exchanger), member 1	6546	0.526	0.0149
	TC13000200.hg.1	ARL11	ADP-ribosylation factor-like 11	115761	0.525	0.0399
	TC01002652.hg.1	NRD1	nardilysin (N-arginine dibasic convertase)	4898	0.525	0.0246
	TC10001636.hg.1	OBFC1	oligonucleotide/oligosaccharide-binding fold containing 1	79991	0.524	0.0473
	TC16000482.hg.1	NLRC5	NLR family, CARD domain containing 5	84166	0.523	0.0386
	TC12001157.hg.1	C1RL	complement component 1, r subcomponent-like	51279	0.522	0.0252
	TC04001431.hg.1	UBE2D3	ubiquitin-conjugating enzyme E2D 3	7323	0.52	0.0266
	TC04000809.hg.1	RAPGEF2	Rap guanine nucleotide exchange factor (GEF) 2	9693	0.518	0.02
	TC09000565.hg.1	HSDL2	hydroxysteroid dehydrogenase like 2	84263	0.517	0.0288
	TC04001267.hg.1	SULT1B1	sulfotransferase family, cytosolic, 1B, member 1	27284	0.517	0.0481
	TC10001725.hg.1	CHST15	carbohydrate (N-acetylgalactosamine 4-sulfate 6-O) sulfotransferase 15	51363	0.513	0.0246
	TC20000206.hg.1	HCK	HCK proto-oncogene, Src family tyrosine kinase	3055	0.513	0.0212
	TC22001384.hg.1	NUP50-AS1	NUP50 antisense RNA 1 (head to head)	100506714	0.507	0.0233
	TC02001922.hg.1	RAB1A	RAB1A, member RAS oncogene family	5861	0.507	0.0459
	TC22001185.hg.1	RPL23AP82	ribosomal protein L23a pseudogene 82	284942	0.507	0.0356
	TC06001929.hg.1	AKIRIN2	akirin 2	55122	0.506	0.0428
	TC20000924.hg.1	ZNFX1	zinc finger, NFX1-type containing 1	57169	0.502	0.0448
	TC05001518.hg.1	LHFPL2	lipoma HMGIC fusion partner-like 2	10184	0.499	0.0103
	TC10000192.hg.1	RAB18	RAB18, member RAS oncogene family	22931	0.496	0.0281
	TC12001214.hg.1	CLEC1A	C-type lectin domain family 1, member A	51267	0.495	0.0284
	TC04001577.hg.1	ELF2	E74-like factor 2 (ets domain transcription factor)	1998	0.493	0.0267
	TC02001993.hg.1	MOB1A	MOB kinase activator 1A	55233	0.492	0.0283
	TC14001466.hg.1	SERPINA1	serpin peptidase inhibitor, clade A (alpha-1 antiproteinase, antitrypsin), member 1	5265	0.492	0.014
	TC06002729.hg.1	PSMB8-AS1	PSMB8 antisense RNA 1 (head to head)	100507463	0.49	0.0138
	TC06001079.hg.1	SUMO4	small ubiquitin-like modifier 4	387082	0.488	0.0419
	TC08000608.hg.1	VPS13B	vacuolar protein sorting 13 homolog B (yeast)	157680	0.488	0.0315
	TC04000486.hg.1	HERC3	HECT and RLD domain containing E3 ubiquitin protein ligase 3	8916	0.486	0.0281
	TC09002685.hg.1	HIATL2	hippocampus abundant transcript-like 2	84278	0.486	0.0264
	TC03000495.hg.1	ST3GAL6	ST3 beta-galactoside alpha-2,3-sialyltransferase 6	10402	0.483	0.033
	TC11000412.hg.1	PTPRJ	protein tyrosine phosphatase, receptor type, J	5795	0.482	0.0191
	TC02001148.hg.1	COQ10B	coenzyme Q10 homolog B (S. cerevisiae)	80219	0.481	0.0482
	TC12000263.hg.1	STK38L	serine/threonine kinase 38 like	23012	0.481	0.0188
	TC02001177.hg.1	CASP8	caspase 8, apoptosis-related cysteine peptidase	841	0.478	0.0296
	TC11001332.hg.1	HBBP1	hemoglobin, beta pseudogene 1	3044	0.476	0.0384
	TC11002346.hg.1	MPZL2	myelin protein zero-like 2	10205	0.475	0.048
	TC13000189.hg.1	ITM2B	integral membrane protein 2B	9445	0.474	0.0173
	TC01006339.hg.1	FCGR2C	Fc fragment of IgG, low affinity IIc, receptor for (CD32) (gene/pseudogene)	9103	0.473	0.0499
	TC05002050.hg.1	LCP2	lymphocyte cytosolic protein 2 (SH2 domain containing leukocyte protein of 76kDa)	3937	0.471	0.048
	TC01005067.hg.1	H3F3AP4	H3 histone, family 3A, pseudogene 4	440926	0.47	0.0266
	TC07001871.hg.1	LINC-PINT	long intergenic non-protein coding RNA, p53 induced transcript	378805	0.467	0.0319
	TC01001315.hg.1	SLC25A44	solute carrier family 25, member 44	9673	0.466	0.0218
	TC15000320.hg.1	SNAP23	synaptosomal-associated protein, 23kDa	8773	0.466	0.0206
	TC14000165.hg.1	GMPR2	guanosine monophosphate reductase 2	51292	0.465	0.02
	TC11001230.hg.1	IFITM3	interferon induced transmembrane protein 3	10410	0.461	0.0213
	TC08001638.hg.1	FAM49B	family with sequence similarity 49, member B	51571	0.458	0.0356
	TC01001830.hg.1	BROX	BRO1 domain and CAAX motif containing	148362	0.455	0.034
	TC02002670.hg.1	FAM126B	family with sequence similarity 126, member B	285172	0.455	0.0102
	TC22000476.hg.1	BID	BH3 interacting domain death agonist	637	0.454	0.0193
	TC16000650.hg.1	HSBP1	heat shock factor binding protein 1	3281	0.453	0.0321
	TC05000253.hg.1	GAPT	GRB2-binding adaptor protein, transmembrane	202309	0.452	0.0315
	TC21001059.hg.1	IL10RB	interleukin 10 receptor, beta	3588	0.452	0.0193
	TC0X000393.hg.1	NHSL2	NHS-like 2	340527	0.446	0.0302
	TC11000864.hg.1	TMEM126B	transmembrane protein 126B	55863	0.443	0.0495
	TC04002945.hg.1	HSD17B11	hydroxysteroid (17-beta) dehydrogenase 11	51170	0.44	0.0457
	TC19000256.hg.1	CD97	CD97 molecule	976	0.438	0.0208
	TC03000729.hg.1	CEP63	centrosomal protein 63kDa	80254	0.437	0.0432
	TC03001540.hg.1	FRMD4B	FERM domain containing 4B	23150	0.435	0.0273
	TC03003400.hg.1	PCYT1A	phosphate cytidylyltransferase 1, choline, alpha	5130	0.434	0.0284
	TC10000452.hg.1	MCU	mitochondrial calcium uniporter	90550	0.433	0.0263
	TC01003412.hg.1	TSTD1	thiosulfate sulfurtransferase (rhodanese)-like domain containing 1	100131187	0.433	0.0279
	TC12003283.hg.1	TMBIM4	transmembrane BAX inhibitor motif containing 4	51643	0.432	0.0289
	TC01003413.hg.1	USF1	upstream transcription factor 1	7391	0.431	0.044
	TC03000065.hg.1	ATG7	autophagy related 7	10533	0.43	0.0267
	TC0X001156.hg.1	FTX	FTX transcript, XIST regulator (non-protein coding)	100302692	0.429	0.0253
	TC01001414.hg.1	ATF6	activating transcription factor 6	22926	0.427	0.0316
	TC03001549.hg.1	EIF4E3	eukaryotic translation initiation factor 4E family member 3	317649	0.423	0.0484
	TC17000565.hg.1	TMUB2	transmembrane and ubiquitin-like domain containing 2	79089	0.422	0.0343
	TC14000332.hg.1	PELI2	pellino E3 ubiquitin protein ligase family member 2	57161	0.421	0.045
	TC10000922.hg.1	PTPRE	protein tyrosine phosphatase, receptor type, E	5791	0.421	0.02
	TC01002681.hg.1	TMEM59	transmembrane protein 59	9528	0.421	0.0127
	TC05001687.hg.1	PGGT1B	protein geranylgeranyltransferase type I, beta subunit	5229	0.419	0.0365
	TC01001993.hg.1	EFCAB2	EF-hand calcium binding domain 2	84288	0.418	0.0457
	TC11002165.hg.1	PICALM	phosphatidylinositol binding clathrin assembly protein	8301	0.411	0.037
	TC15000342.hg.1	B2M	beta-2-microglobulin	567	0.41	0.0372
	TC11000256.hg.1	HTATIP2	HIV-1 Tat interactive protein 2, 30kDa	10553	0.403	0.0421
	TC05002101.hg.1	UIMC1	ubiquitin interaction motif containing 1	51720	0.402	0.0298
	TC0X002316.hg.1	HNRNPH2	heterogeneous nuclear ribonucleoprotein H2 (H')	3188	0.401	0.0226
	TC14001225.hg.1	MAX	MYC associated factor X	4149	0.4	0.0187
	TC08000546.hg.1	OSGIN2	oxidative stress induced growth inhibitor family member 2	734	0.4	0.0443
	TC11001716.hg.1	PHF21A	PHD finger protein 21A	51317	0.4	0.0298
	TC01001178.hg.1	PLEKHO1	pleckstrin homology domain containing, family O member 1	51177	0.4	0.0455
	TC20000044.hg.1	PANK2	pantothenate kinase 2	80025	0.398	0.0425
	TC0X001024.hg.1	GRIPAP1	GRIP1 associated protein 1	56850	0.394	0.0367
	TC14002028.hg.1	FLJ31306	uncharacterized LOC379025	379025	0.392	0.0408
	TC11000010.hg.1	IFITM2	interferon induced transmembrane protein 2	10581	0.39	0.0393
	TC07000877.hg.1	TBXAS1	thromboxane A synthase 1 (platelet)	6916	0.388	0.0296
	TC01000990.hg.1	CAPZA1	capping protein (actin filament) muscle Z-line, alpha 1	829	0.387	0.0273
	TC01001209.hg.1	PSMB4	proteasome (prosome, macropain) subunit, beta type, 4	5692	0.385	0.0459
	TC01003677.hg.1	LINC00862	long intergenic non-protein coding RNA 862	554279	0.381	0.0283
	TC15001634.hg.1	NPTN	neuroplastin	27020	0.377	0.0404
	TC09000004.hg.1	DOCK8	dedicator of cytokinesis 8	81704	0.374	0.0418
	TC17002893.hg.1	USP32P2	ubiquitin specific peptidase 32 pseudogene 2	220594	0.374	0.0282
	TC14000784.hg.1	RCOR1	REST corepressor 1	23186	0.373	0.0367
	TC11000911.hg.1	C11orf54	chromosome 11 open reading frame 54	28970	0.37	0.0365
	TC03001271.hg.1	DYNC1LI1	dynein, cytoplasmic 1, light intermediate chain 1	51143	0.366	0.0346
	TC20001758.hg.1	RTFDC1	replication termination factor 2 domain containing 1	51507	0.363	0.0246
	TC09001228.hg.1	GNAQ	guanine nucleotide binding protein (G protein), q polypeptide	2776	0.362	0.0279
	TC17002871.hg.1	USP32P1	ubiquitin specific peptidase 32 pseudogene 1	162632	0.362	0.0266
	TC01000968.hg.1	CD53	CD53 molecule	963	0.357	0.0421
	TC01001185.hg.1	PRPF3	pre-mRNA processing factor 3	9129	0.357	0.0362
	TC6_mcf_hap5000215.hg.1	UBD	ubiquitin D	10537	0.353	0.0209
	TC06003719.hg.1	COX7A2	cytochrome c oxidase subunit VIIa polypeptide 2 (liver)	1347	0.346	0.0496
	TC05001553.hg.1	TMEM167A	transmembrane protein 167A	153339	0.346	0.0492
	TC13000876.hg.1	CARS2	cysteinyl-tRNA synthetase 2, mitochondrial (putative)	79587	0.344	0.0337
	TC19000583.hg.1	CEACAM5	carcinoembryonic antigen-related cell adhesion molecule 5	1048	0.341	0.0455
	TC03001038.hg.1	LPP	LIM domain containing preferred translocation partner in lipoma	4026	0.336	0.0454
	TC17000973.hg.1	CRK	v-crk avian sarcoma virus CT10 oncogene homolog	1398	0.329	0.044
	TC14001116.hg.1	SOS2	son of sevenless homolog 2 (Drosophila)	6655	0.327	0.047
	TC13000642.hg.1	LCP1	lymphocyte cytosolic protein 1 (L-plastin)	3936	0.326	0.0458
	TC01000124.hg.1	RBP7	retinol binding protein 7, cellular	116362	0.326	0.0204
	TC19001922.hg.1	CHMP2A	charged multivesicular body protein 2A	27243	0.324	0.0333
	TC03003390.hg.1	COX17	COX17 cytochrome c oxidase copper chaperone	10063	0.321	0.0465
	TC12001177.hg.1	LINC00937	long intergenic non-protein coding RNA 937	389634	0.309	0.038
	TC16000295.hg.1	KIAA0556	KIAA0556	23247	0.299	0.0418
	TC01002171.hg.1	RERE	arginine-glutamic acid dipeptide (RE) repeats	473	0.282	0.049
	TC02005035.hg.1	CHMP3	charged multivesicular body protein 3	51652	0.272	0.0379
	TC17001079.hg.1	DVL2	dishevelled segment polarity protein 2	1856	-0.23	0.0428
	TC17001295.hg.1	POLDIP2	polymerase (DNA-directed), delta interacting protein 2	26073	-0.243	0.0492
	TC19000084.hg.1	CCDC94	coiled-coil domain containing 94	55702	-0.245	0.0438
	TC08001525.hg.1	TMEM74	transmembrane protein 74	157753	-0.246	0.049
	TC07000144.hg.1	GPNMB	glycoprotein (transmembrane) nmb	10457	-0.247	0.0415
	TC07000011.hg.1	HEATR2	HEAT repeat containing 2	54919	-0.247	0.045
	TC09002324.hg.1	LINC00094	long intergenic non-protein coding RNA 94	266655	-0.247	0.0491
	TC22001484.hg.1	KLHL22	kelch-like family member 22	84861	-0.249	0.045
	TC17001888.hg.1	TRIM65	tripartite motif containing 65	201292	-0.249	0.0415
	TC01000889.hg.1	SNX7	sorting nexin 7	51375	-0.255	0.0453
	TC16000979.hg.1	GTF3C1	general transcription factor IIIC, polypeptide 1, alpha 220kDa	2975	-0.258	0.0392
	TC08000839.hg.1	GPAA1	glycosylphosphatidylinositol anchor attachment 1	8733	-0.263	0.0478
	TC17000921.hg.1	RPTOR	regulatory associated protein of MTOR, complex 1	57521	-0.263	0.0471
	TC12003214.hg.1	CNPY2	canopy FGF signaling regulator 2	10330	-0.265	0.0403
	TC01006326.hg.1	HIST2H2AC	histone cluster 2, H2ac	8338	-0.265	0.0408
	TC19000363.hg.1	KLHL26	kelch-like family member 26	55295	-0.268	0.0443
	TC04000071.hg.1	LOC93622	Morf4 family associated protein 1-like 1 pseudogene	93622	-0.272	0.0433
	TC04001330.hg.1	PRKG2	protein kinase, cGMP-dependent, type II	5593	-0.272	0.0278
	TC19000937.hg.1	ZNF460	zinc finger protein 460	10794	-0.272	0.0382
	TC11001311.hg.1	TRIM68	tripartite motif containing 68	55128	-0.274	0.0385
	TC22000988.hg.1	BCRP2	breakpoint cluster region pseudogene 2	400892	-0.276	0.044
	TC16000059.hg.1	TSC2	tuberous sclerosis 2	7249	-0.276	0.0463
	TC01002285.hg.1	ATP13A2	ATPase type 13A2	23400	-0.281	0.0324
	TC22000843.hg.1	TCF20	transcription factor 20 (AR1)	6942	-0.282	0.0368
	TC17001973.hg.1	FASN	fatty acid synthase	2194	-0.285	0.0389
	TC19001127.hg.1	CD320	CD320 molecule	51293	-0.286	0.036
	TC19002699.hg.1	HNRNPL	heterogeneous nuclear ribonucleoprotein L	3191	-0.288	0.0315
	TC06000985.hg.1	ENPP1	ectonucleotide pyrophosphatase/phosphodiesterase 1	5167	-0.29	0.0487
	TC03002861.hg.1	PLCD1	phospholipase C, delta 1	5333	-0.292	0.0393
	TC17000854.hg.1	TSEN54	TSEN54 tRNA splicing endonuclease subunit	283989	-0.292	0.0279
	TC07001997.hg.1	ZNF425	zinc finger protein 425	155054	-0.292	0.0225
	TC20000584.hg.1	ADRA1D	adrenoceptor alpha 1D	146	-0.293	0.0389
	TC01000427.hg.1	HDAC1	histone deacetylase 1	3065	-0.295	0.0421
	TC16001220.hg.1	PDF	peptide deformylase (mitochondrial)	64146	-0.295	0.0355
	TC0X000270.hg.1	PPP1R3F	protein phosphatase 1, regulatory subunit 3F	89801	-0.295	0.0443
	TC01004513.hg.1	LINC01140	long intergenic non-protein coding RNA 1140	339524	-0.297	0.0307
	TC06001550.hg.1	EHMT2	euchromatic histone-lysine N-methyltransferase 2	10919	-0.298	0.0233
	TC14000834.hg.1	PACS2	phosphofurin acidic cluster sorting protein 2	23241	-0.298	0.036
	TC18000094.hg.1	GATA6	GATA binding protein 6	2627	-0.299	0.04
	TC0X001516.hg.1	BCAP31	B-cell receptor-associated protein 31	10134	-0.3	0.032
	TC0X000914.hg.1	KLHL34	kelch-like family member 34	257240	-0.3	0.048
	TC07002288.hg.1	CCM2	cerebral cavernous malformation 2	83605	-0.301	0.0484
	TC17002872.hg.1	SARM1	sterile alpha and TIR motif containing 1	23098	-0.301	0.0276
	TC06000347.hg.1	TUBB	tubulin, beta class I	203068	-0.303	0.0335
	TC19001114.hg.1	XAB2	XPA binding protein 2	56949	-0.303	0.0386
	TC02002113.hg.1	SEMA4C	sema domain, immunoglobulin domain (Ig), transmembrane domain (TM) and short cytoplasmic domain, (semaphorin) 4C	54910	-0.304	0.038
	TC01000084.hg.1	KCNAB2	potassium voltage-gated channel, shaker-related subfamily, beta member 2	8514	-0.307	0.0492
	TC17000853.hg.1	KIAA0195	KIAA0195	9772	-0.307	0.0459
	TC19001215.hg.1	FARSA	phenylalanyl-tRNA synthetase, alpha subunit	2193	-0.308	0.0246
	TC03001216.hg.1	RFTN1	raftlin, lipid raft linker 1	23180	-0.308	0.0374
	TC07000043.hg.1	FOXK1	forkhead box K1	221937	-0.309	0.0425
	TC15002516.hg.1	EIF3J-AS1	EIF3J antisense RNA 1 (head to head)	645212	-0.31	0.0418
	TC19000182.hg.1	ILF3	interleukin enhancer binding factor 3, 90kDa	3609	-0.311	0.0377
	TC20000094.hg.1	ISM1	isthmin 1, angiogenesis inhibitor	140862	-0.312	0.0483
	TC16000555.hg.1	PRMT7	protein arginine methyltransferase 7	54496	-0.312	0.044
	TC10000621.hg.1	PAPSS2	3'-phosphoadenosine 5'-phosphosulfate synthase 2	9060	-0.315	0.0489
	TC11000637.hg.1	SIPA1	signal-induced proliferation-associated 1	6494	-0.316	0.0282
	TC17001972.hg.1	DUS1L	dihydrouridine synthase 1-like (S. cerevisiae)	64118	-0.318	0.0468
	TC19001703.hg.1	GYS1	glycogen synthase 1 (muscle)	2997	-0.319	0.0297
	TC05000736.hg.1	VTRNA1-3	vault RNA 1-3	56662	-0.32	0.0305
	TC12002096.hg.1	NCOR2	nuclear receptor corepressor 2	9612	-0.322	0.0314
	TC02000168.hg.1	CAD	carbamoyl-phosphate synthetase 2, aspartate transcarbamylase, and dihydroorotase	790	-0.323	0.0298
	TC11000652.hg.1	SF3B2	splicing factor 3b, subunit 2, 145kDa	10992	-0.324	0.0267
	TC07001543.hg.1	POMZP3	POM121 and ZP3 fusion	22932	-0.327	0.0458
	TC0X001065.hg.1	HSD17B10	hydroxysteroid (17-beta) dehydrogenase 10	3028	-0.328	0.0469
	TC09000450.hg.1	PHF2	PHD finger protein 2	5253	-0.328	0.0443
	TC19001162.hg.1	RAVER1	ribonucleoprotein, PTB-binding 1	125950	-0.33	0.0419
	TC17001934.hg.1	SGSH	N-sulfoglucosamine sulfohydrolase	6448	-0.33	0.0307
	TC09002699.hg.1	ALG2	ALG2, alpha-1,3/1,6-mannosyltransferase	85365	-0.331	0.0171
	TC12000536.hg.1	DTX3	deltex 3, E3 ubiquitin ligase	196403	-0.331	0.0493
	TC16001343.hg.1	PIEZO1	piezo-type mechanosensitive ion channel component 1	9780	-0.331	0.033
	TC17000207.hg.1	ALKBH5	AlkB family member 5, RNA demethylase	54890	-0.332	0.0302
	TC16000308.hg.1	ATXN2L	ataxin 2-like	11273	-0.332	0.0338
	TC01002103.hg.1	C1orf233	chromosome 1 open reading frame 233	643988	-0.332	0.0136
	TC19001048.hg.1	PIP5K1C	phosphatidylinositol-4-phosphate 5-kinase, type I, gamma	23396	-0.334	0.0266
	TC01000057.hg.1	SKI	SKI proto-oncogene	6497	-0.334	0.0475
	TC11000693.hg.1	AIP	aryl hydrocarbon receptor interacting protein	9049	-0.335	0.0415
	TC22000260.hg.1	MCM5	minichromosome maintenance complex component 5	4174	-0.335	0.0202
	TC10000068.hg.1	TAF3	TAF3 RNA polymerase II, TATA box binding protein (TBP)-associated factor, 140kDa	83860	-0.335	0.0367
	TC14000280.hg.1	ARF6	ADP-ribosylation factor 6	382	-0.336	0.0308
	TC04000636.hg.1	FAT4	FAT atypical cadherin 4	79633	-0.338	0.0433
	TC22000494.hg.1	SLC25A1	solute carrier family 25 (mitochondrial carrier; citrate transporter), member 1	6576	-0.338	0.0478
	TC07000476.hg.1	RHBDD2	rhomboid domain containing 2	57414	-0.339	0.0297
	TC02001437.hg.1	ACKR3	atypical chemokine receptor 3	57007	-0.34	0.0428
	TC19001238.hg.1	GIPC1	GIPC PDZ domain containing family, member 1	10755	-0.34	0.0259
	TC22001027.hg.1	BCRP3	breakpoint cluster region pseudogene 3	644165	-0.341	0.0288
	TC14000837.hg.1	CRIP2	cysteine-rich protein 2	1397	-0.341	0.0423
	TC12001545.hg.1	RARG	retinoic acid receptor, gamma	5916	-0.341	0.02
	TC12000883.hg.1	RPH3A	rabphilin 3A	22895	-0.341	0.0457
	TC19000257.hg.1	PKN1	protein kinase N1	5585	-0.342	0.0157
	TC19000041.hg.1	REEP6	receptor accessory protein 6	92840	-0.342	0.0488
	TC02001685.hg.1	PPM1G	protein phosphatase, Mg2+/Mn2+ dependent, 1G	5496	-0.343	0.0275
	TC01006373.hg.1	RORC	RAR-related orphan receptor C	6097	-0.346	0.0418
	TC22000913.hg.1	SBF1	SET binding factor 1	6305	-0.347	0.0243
	TC19000144.hg.1	CERS4	ceramide synthase 4	79603	-0.349	0.0281
	TC22001433.hg.1	PI4KA	phosphatidylinositol 4-kinase, catalytic, alpha	5297	-0.35	0.0297
	TC12002009.hg.1	C12orf49	chromosome 12 open reading frame 49	79794	-0.351	0.0217
	TC12001060.hg.1	FBRSL1	fibrosin-like 1	57666	-0.351	0.0314
	TC03001920.hg.1	GPR149	G protein-coupled receptor 149	344758	-0.351	0.0398
	TC16000364.hg.1	SETD1A	SET domain containing 1A	9739	-0.353	0.0491
	TC22000650.hg.1	SF3A1	splicing factor 3a, subunit 1, 120kDa	10291	-0.353	0.0282
	TC09000187.hg.1	TESK1	testis-specific kinase 1	7016	-0.354	0.0291
	TC11002334.hg.1	PCSK7	proprotein convertase subtilisin/kexin type 7	9159	-0.356	0.031
	TC17001433.hg.1	PIP4K2B	phosphatidylinositol-5-phosphate 4-kinase, type II, beta	8396	-0.357	0.0233
	TC19000190.hg.1	SMARCA4	SWI/SNF related, matrix associated, actin dependent regulator of chromatin, subfamily a, member 4	6597	-0.359	0.0204
	TC0X000628.hg.1	STK26	serine/threonine protein kinase 26	51765	-0.36	0.0457
	TC16000294.hg.1	IL21R	interleukin 21 receptor	50615	-0.362	0.0264
	TC07000946.hg.1	OR6B1	olfactory receptor, family 6, subfamily B, member 1	135946	-0.363	0.0178
	TC07002004.hg.1	ZNF777	zinc finger protein 777	27153	-0.365	0.0348
	TC17001552.hg.1	VAT1	vesicle amine transport 1	10493	-0.366	0.0283
	TC02001967.hg.1	CLEC4F	C-type lectin domain family 4, member F	165530	-0.368	0.0178
	TC22000624.hg.1	TTC28	tetratricopeptide repeat domain 28	23331	-0.368	0.02
	TC12000621.hg.1	KCNMB4	potassium large conductance calcium-activated channel, subfamily M, beta member 4	27345	-0.369	0.0487
	TC17001028.hg.1	PELP1	proline, glutamate and leucine rich protein 1	27043	-0.37	0.0143
	TC19001095.hg.1	KHSRP	KH-type splicing regulatory protein	8570	-0.371	0.0419
	TC15001194.hg.1	LPCAT4	lysophosphatidylcholine acyltransferase 4	254531	-0.371	0.0382
	TC21000768.hg.1	PFKL	phosphofructokinase, liver	5211	-0.372	0.0438
	TC12001632.hg.1	AGAP2	ArfGAP with GTPase domain, ankyrin repeat and PH domain 2	116986	-0.373	0.0204
	TC16001330.hg.1	FBXO31	F-box protein 31	79791	-0.375	0.0309
	TC19000934.hg.1	ZNF264	zinc finger protein 264	9422	-0.375	0.0225
	TC17001913.hg.1	TMC6	transmembrane channel-like 6	11322	-0.379	0.0224
	TC17001875.hg.1	MIF4GD	MIF4G domain containing	57409	-0.38	0.0392
	TC09000846.hg.1	NELFB	negative elongation factor complex member B	25920	-0.38	0.0153
	TC17000089.hg.1	ACAP1	ArfGAP with coiled-coil, ankyrin repeat and PH domains 1	9744	-0.387	0.0403
	TC14000554.hg.1	CALM1	calmodulin 1 (phosphorylase kinase, delta)	801	-0.387	0.0283
	TC08002614.hg.1	ZNF395	zinc finger protein 395	55893	-0.387	0.0419
	TC08001835.hg.1	CCAR2	cell cycle and apoptosis regulator 2	57805	-0.388	0.0321
	TC0X001530.hg.1	FLNA	filamin A, alpha	2316	-0.389	0.0446
	TC12002034.hg.1	GCN1L1	GCN1 general control of amino-acid synthesis 1-like 1 (yeast)	10985	-0.389	0.0191
	TC12000961.hg.1	ORAI1	ORAI calcium release-activated calcium modulator 1	84876	-0.39	0.0316
	TC11001844.hg.1	PRPF19	pre-mRNA processing factor 19	27339	-0.392	0.0429
	TC20000764.hg.1	NOL4L	nucleolar protein 4-like	140688	-0.395	0.0193
	TC0X000321.hg.1	TSR2	TSR2, 20S rRNA accumulation, homolog (S. cerevisiae)	90121	-0.395	0.0471
	TC19001155.hg.1	OLFM2	olfactomedin 2	93145	-0.397	0.0259
	TC06000424.hg.1	SYNGAP1	synaptic Ras GTPase activating protein 1	8831	-0.397	0.0395
	TC02002106.hg.1	SNRNP200	small nuclear ribonucleoprotein 200kDa (U5)	23020	-0.398	0.0415
	TC17001922.hg.1	USP36	ubiquitin specific peptidase 36	57602	-0.399	0.0343
	TC11003186.hg.1	HNRNPUL2-BSCL2	HNRNPUL2-BSCL2 readthrough	100534595	-0.4	0.0104
	TC15001669.hg.1	IMP3	IMP3, U3 small nucleolar ribonucleoprotein	55272	-0.401	0.0322
	TC03000320.hg.1	RBM15B	RNA binding motif protein 15B	29890	-0.401	0.0256
	TC16000543.hg.1	RLTPR	RGD motif, leucine rich repeats, tropomodulin domain and proline-rich containing	146206	-0.401	0.0267
	TC02000671.hg.1	SOWAHC	sosondowah ankyrin repeat domain family member C	65124	-0.401	0.03
	TC19001233.hg.1	LPHN1	latrophilin 1	22859	-0.402	0.0218
	TC19000442.hg.1	GPI	glucose-6-phosphate isomerase	2821	-0.404	0.0374
	TC16000734.hg.1	JMJD8	jumonji domain containing 8	339123	-0.404	0.0356
	TC05000715.hg.1	CXXC5	CXXC finger protein 5	51523	-0.406	0.0321
	TC16000736.hg.1	FBXL16	F-box and leucine-rich repeat protein 16	146330	-0.406	0.0379
	TC16000328.hg.1	MAZ	MYC-associated zinc finger protein (purine-binding transcription factor)	4150	-0.41	0.0159
	TC11000395.hg.1	DGKZ	diacylglycerol kinase, zeta	8525	-0.411	0.0203
	TC16000699.hg.1	RPL13	ribosomal protein L13	6137	-0.413	0.0419
	TC02001419.hg.1	DGKD	diacylglycerol kinase, delta 130kDa	8527	-0.415	0.0226
	TC0X001067.hg.1	HUWE1	HECT, UBA and WWE domain containing 1, E3 ubiquitin protein ligase	10075	-0.415	0.0454
	TC11000375.hg.1	TSPAN18	tetraspanin 18	90139	-0.415	0.0315
	TC05000664.hg.1	JADE2	jade family PHD finger 2	23338	-0.417	0.0419
	TC02001792.hg.1	LOC728819	hCG1645220	728819	-0.417	0.0426
	TC11003459.hg.1	VPS51	vacuolar protein sorting 51 homolog (S. cerevisiae)	738	-0.418	0.0208
	TC07002021.hg.1	GIMAP6	GTPase, IMAP family member 6	474344	-0.419	0.0451
	TC09000480.hg.1	HABP4	hyaluronan binding protein 4	22927	-0.419	0.0359
	TC22000867.hg.1	LDOC1L	leucine zipper, down-regulated in cancer 1-like	84247	-0.419	0.0225
	TC12000512.hg.1	IL23A	interleukin 23, alpha subunit p19	51561	-0.42	0.0443
	TC01002741.hg.1	JAK1	Janus kinase 1	3716	-0.42	0.0307
	TC16001938.hg.1	CHTF8	CTF8, chromosome transmission fidelity factor 8 homolog (S. cerevisiae)	54921	-0.421	0.0343
	TC20000518.hg.1	PPDPF	pancreatic progenitor cell differentiation and proliferation factor	79144	-0.421	0.0367
	TC16002097.hg.1	NPIPA8	nuclear pore complex interacting protein family, member A8	101059953	-0.423	0.0273
	TC20001062.hg.1	NOP56	NOP56 ribonucleoprotein	10528	-0.425	0.0225
	TC16000314.hg.1	LAT	linker for activation of T cells	27040	-0.427	0.0295
	TC15001825.hg.1	MFGE8	milk fat globule-EGF factor 8 protein	4240	-0.429	0.0478
	TC08001737.hg.1	PLEC	plectin	5339	-0.429	0.0193
	TC01003330.hg.1	UBQLN4	ubiquilin 4	56893	-0.429	0.0224
	TC02002348.hg.1	FAM168B	family with sequence similarity 168, member B	130074	-0.43	0.0361
	TC01003985.hg.1	IRF2BP2	interferon regulatory factor 2 binding protein 2	359948	-0.43	0.0438
	TC07003337.hg.1	PVRIG	poliovirus receptor related immunoglobulin domain containing	79037	-0.433	0.0373
	TC01001220.hg.1	LOC100132111	uncharacterized LOC100132111	100132111	-0.435	0.0272
	TC15000285.hg.1	BAHD1	bromo adjacent homology domain containing 1	22893	-0.436	0.0193
	TC12000597.hg.1	DYRK2	dual-specificity tyrosine-(Y)-phosphorylation regulated kinase 2	8445	-0.436	0.0487
	TC17000488.hg.1	THRA	thyroid hormone receptor, alpha	7067	-0.436	0.0151
	TC12001481.hg.1	FMNL3	formin-like 3	91010	-0.438	0.0305
	TC14001324.hg.1	C14orf1	chromosome 14 open reading frame 1	11161	-0.44	0.0465
	TC19001555.hg.1	EXOSC5	exosome component 5	56915	-0.44	0.0224
	TC11003462.hg.1	FAM89B	family with sequence similarity 89, member B	23625	-0.44	0.0269
	TC17001263.hg.1	USP22	ubiquitin specific peptidase 22	23326	-0.442	0.0299
	TC11001934.hg.1	LTBP3	latent transforming growth factor beta binding protein 3	4054	-0.444	0.0253
	TC11002049.hg.1	NUMA1	nuclear mitotic apparatus protein 1	4926	-0.444	0.0199
	TC02002276.hg.1	BIN1	bridging integrator 1	274	-0.445	0.02
	TC03000690.hg.1	HMCES	5-hydroxymethylcytosine (hmC) binding, ES cell-specific	56941	-0.446	0.0281
	TC01002211.hg.1	DHRS3	dehydrogenase/reductase (SDR family) member 3	9249	-0.447	0.0202
	TC19001659.hg.1	TMEM160	transmembrane protein 160	54958	-0.447	0.0204
	TC12001051.hg.1	EP400	E1A binding protein p400	57634	-0.448	0.0386
	TC12000137.hg.1	PHC1	polyhomeotic homolog 1 (Drosophila)	1911	-0.449	0.0219
	TC22000825.hg.1	TOB2	transducer of ERBB2, 2	10766	-0.45	0.0316
	TC19001527.hg.1	FCGBP	Fc fragment of IgG binding protein	8857	-0.454	0.0206
	TC17001576.hg.1	UBTF	upstream binding transcription factor, RNA polymerase I	7343	-0.456	0.0252
	TC10001744.hg.1	ADAM12	ADAM metallopeptidase domain 12	8038	-0.458	0.0103
	TC01003901.hg.1	ITPKB	inositol-trisphosphate 3-kinase B	3707	-0.46	0.0396
	TC02001950.hg.1	AAK1	AP2 associated kinase 1	22848	-0.461	0.0387
	TC09001757.hg.1	DPP7	dipeptidyl-peptidase 7	29952	-0.463	0.0167
	TC19001256.hg.1	RASAL3	RAS protein activator like 3	64926	-0.463	0.0225
	TC17001015.hg.1	ATP2A3	ATPase, Ca++ transporting, ubiquitous	489	-0.464	0.0355
	TC16001427.hg.1	PKD1P1	polycystic kidney disease 1 (autosomal dominant) pseudogene 1	339044	-0.465	0.0171
	TC07000430.hg.1	POM121	POM121 transmembrane nucleoporin	9883	-0.465	0.0492
	TC07001530.hg.1	POM121C	POM121 transmembrane nucleoporin C	100101267	-0.465	0.0456
	TC02000594.hg.1	ZAP70	zeta-chain (TCR) associated protein kinase 70kDa	7535	-0.47	0.0451
	TC17001088.hg.1	ZBTB4	zinc finger and BTB domain containing 4	57659	-0.471	0.0282
	TC17000194.hg.1	MPRIP	myosin phosphatase Rho interacting protein	23164	-0.472	0.022
	TC14002314.hg.1	CRIP1	cysteine-rich protein 1 (intestinal)	1396	-0.474	0.013
	TC02000055.hg.1	KLF11	Kruppel-like factor 11	8462	-0.475	0.0225
	TC10002118.hg.1	SLC29A3	solute carrier family 29 (equilibrative nucleoside transporter), member 3	55315	-0.476	0.0469
	TC0X000231.hg.1	USP11	ubiquitin specific peptidase 11	8237	-0.477	0.0292
	TC17002850.hg.1	VAMP2	vesicle-associated membrane protein 2 (synaptobrevin 2)	6844	-0.477	0.047
	TC01006348.hg.1	IFFO2	intermediate filament family orphan 2	126917	-0.479	0.0303
	TC17001319.hg.1	ABHD15	abhydrolase domain containing 15	116236	-0.48	0.0199
	TC15000622.hg.1	SMAD3	SMAD family member 3	4088	-0.481	0.0387
	TC19001016.hg.1	ABHD17A	abhydrolase domain containing 17A	81926	-0.482	0.0216
	TC19000669.hg.1	ARHGAP35	Rho GTPase activating protein 35	2909	-0.482	0.0316
	TC17001453.hg.1	PGAP3	post-GPI attachment to proteins 3	93210	-0.482	0.0195
	TC03001772.hg.1	PLXND1	plexin D1	23129	-0.482	0.0161
	TC22000890.hg.1	CERK	ceramide kinase	64781	-0.483	0.0176
	TC14000828.hg.1	PLD4	phospholipase D family, member 4	122618	-0.483	0.0207
	TC19000250.hg.1	IL27RA	interleukin 27 receptor, alpha	9466	-0.484	0.023
	TC11000030.hg.1	RPLP2	ribosomal protein, large, P2	6181	-0.486	0.0267
	TC09001042.hg.1	SIGMAR1	sigma non-opioid intracellular receptor 1	10280	-0.486	0.0327
	TC17000120.hg.1	CHD3	chromodomain helicase DNA binding protein 3	1107	-0.487	0.0188
	TC19000008.hg.1	GZMM	granzyme M (lymphocyte met-ase 1)	3004	-0.487	0.0243
	TC20000303.hg.1	PLCG1	phospholipase C, gamma 1	5335	-0.487	0.0212
	TC07003080.hg.1	TAF6	TAF6 RNA polymerase II, TATA box binding protein (TBP)-associated factor, 80kDa	6878	-0.488	0.0253
	TC17000892.hg.1	TNRC6C	trinucleotide repeat containing 6C	57690	-0.488	0.047
	TC15000198.hg.1	KLF13	Kruppel-like factor 13	51621	-0.49	0.0267
	TC19001051.hg.1	MATK	megakaryocyte-associated tyrosine kinase	4145	-0.494	0.0308
	TC05001024.hg.1	LOC728554	THO complex 3 pseudogene	728554	-0.495	0.0394
	TC03001077.hg.1	FAM43A	family with sequence similarity 43, member A	131583	-0.496	0.048
	TC12002398.hg.1	SHMT2	serine hydroxymethyltransferase 2 (mitochondrial)	6472	-0.497	0.0405
	TC19000792.hg.1	PPP2R1A	protein phosphatase 2, regulatory subunit A, alpha	5518	-0.498	0.0199
	TC11002005.hg.1	C11orf24	chromosome 11 open reading frame 24	53838	-0.504	0.0157
	TC01002186.hg.1	CLSTN1	calsyntenin 1	22883	-0.504	0.0283
	TC15000687.hg.1	MPI	mannose phosphate isomerase	4351	-0.504	0.0292
	TC11003513.hg.1	BET1L	Bet1 golgi vesicular membrane trafficking protein-like	51272	-0.506	0.0291
	TC14000630.hg.1	EVL	Enah/Vasp-like	51466	-0.507	0.0104
	TC19000971.hg.1	TRIM28	tripartite motif containing 28	10155	-0.508	0.0228
	TC01002370.hg.1	RUNX3	runt-related transcription factor 3	864	-0.51	0.0273
	TC19001501.hg.1	MAP4K1	mitogen-activated protein kinase kinase kinase kinase 1	11184	-0.514	0.0226
	TC17000981.hg.1	PRPF8	pre-mRNA processing factor 8	10594	-0.516	0.0443
	TC03001445.hg.1	DUSP7	dual specificity phosphatase 7	1849	-0.519	0.02
	TC17001783.hg.1	LIMD2	LIM domain containing 2	80774	-0.521	0.0264
	TC12000060.hg.1	CCND2	cyclin D2	894	-0.522	0.0375
	TC22001495.hg.1	SUN2	Sad1 and UNC84 domain containing 2	25777	-0.523	0.0227
	TC19000125.hg.1	ARHGEF18	Rho/Rac guanine nucleotide exchange factor (GEF) 18	23370	-0.524	0.00872
	TC19001158.hg.1	EIF3G	eukaryotic translation initiation factor 3, subunit G	8666	-0.526	0.0374
	TC16002043.hg.1	NPIPA1	nuclear pore complex interacting protein family, member A1	9284	-0.527	0.0199
	TC07002084.hg.1	ESYT2	extended synaptotagmin-like protein 2	57488	-0.529	0.0247
	TC19001018.hg.1	BTBD2	BTB (POZ) domain containing 2	55643	-0.53	0.0252
	TC02003047.hg.1	TRIB2	tribbles pseudokinase 2	28951	-0.535	0.0286
	TC07003306.hg.1	OR2A7	olfactory receptor, family 2, subfamily A, member 7	401427	-0.546	0.0263
	TC19000988.hg.1	RNF126	ring finger protein 126	55658	-0.548	0.0213
	TC02001916.hg.1	SERTAD2	SERTA domain containing 2	9792	-0.548	0.0385
	TC09001748.hg.1	CLIC3	chloride intracellular channel 3	9022	-0.549	0.0381
	TC17001111.hg.1	CTC1	CTS telomere maintenance complex component 1	80169	-0.55	0.0245
	TC01001092.hg.1	LIX1L	Lix1 homolog (chicken) like	128077	-0.55	0.0288
	TC12003284.hg.1	RHOF	ras homolog family member F (in filopodia)	54509	-0.55	0.0187
	TC07003219.hg.1	ARHGEF34P	Rho guanine nucleotide exchange factor (GEF) 34, pseudogene	728377	-0.557	0.028
	TC02002865.hg.1	NMUR1	neuromedin U receptor 1	10316	-0.558	0.00991
	TC17002887.hg.1	PLSCR3	phospholipid scramblase 3	57048	-0.559	0.0252
	TC03001188.hg.1	NUP210	nucleoporin 210kDa	23225	-0.56	0.0124
	TC09000749.hg.1	PRRC2B	proline-rich coiled-coil 2B	84726	-0.56	0.0222
	TC11001231.hg.1	SIGIRR	single immunoglobulin and toll-interleukin 1 receptor (TIR) domain	59307	-0.562	0.0068
	TC12003269.hg.1	LPAR5	lysophosphatidic acid receptor 5	57121	-0.568	0.0311
	TC16001226.hg.1	NOB1	NIN1/RPN12 binding protein 1 homolog (S. cerevisiae)	28987	-0.577	0.0329
	TC16000300.hg.1	SBK1	SH3 domain binding kinase 1	388228	-0.579	0.0387
	TC17001912.hg.1	TNRC6C-AS1	TNRC6C antisense RNA 1	100131096	-0.581	0.0161
	TC01002347.hg.1	ID3	inhibitor of DNA binding 3, dominant negative helix-loop-helix protein	3399	-0.583	0.0415
	TC10002813.hg.1	CALHM2	calcium homeostasis modulator 2	51063	-0.584	0.0243
	TC17000885.hg.1	SEPT9	septin 9	10801	-0.585	0.0193
	TC16000485.hg.1	ARL2BP	ADP-ribosylation factor-like 2 binding protein	23568	-0.589	0.0288
	TC15001507.hg.1	RORA	RAR-related orphan receptor A	6095	-0.592	0.0384
	TC07001102.hg.1	CARD11	caspase recruitment domain family, member 11	84433	-0.597	0.0178
	TC01001274.hg.1	ATP8B2	ATPase, aminophospholipid transporter, class I, type 8B, member 2	57198	-0.6	0.0315
	TC11002896.hg.1	IL10RA	interleukin 10 receptor, alpha	3587	-0.605	0.0269
	TC09001609.hg.1	ENG	endoglin	2022	-0.617	0.0209
	TC22001338.hg.1	MFNG	MFNG O-fucosylpeptide 3-beta-N-acetylglucosaminyltransferase	4242	-0.622	0.0387
	TC13000901.hg.1	RASA3	RAS p21 protein activator 3	22821	-0.622	0.02
	TC19000741.hg.1	PRR12	proline rich 12	57479	-0.624	0.0173
	TC0X001128.hg.1	CXCR3	chemokine (C-X-C motif) receptor 3	2833	-0.627	0.00712
	TC20000040.hg.1	CDC25B	cell division cycle 25B	994	-0.628	0.00814
	TC6_apd_hap1000081.hg.1	LTB	lymphotoxin beta (TNF superfamily, member 3)	4050	-0.63	0.0212
	TC09000993.hg.1	LINGO2	leucine rich repeat and Ig domain containing 2	158038	-0.632	0.00814
	TC17002467.hg.1	TMEM256-PLSCR3	TMEM256-PLSCR3 readthrough (NMD candidate)	100529211	-0.632	0.0374
	TC10000070.hg.1	GATA3	GATA binding protein 3	2625	-0.635	0.0368
	TC15000866.hg.1	CRTC3	CREB regulated transcription coactivator 3	64784	-0.641	0.0389
	TC19002097.hg.1	FXYD5	FXYD domain containing ion transport regulator 5	53827	-0.648	0.0416
	TC01000426.hg.1	LCK	LCK proto-oncogene, Src family tyrosine kinase	3932	-0.65	0.02
	TC11003489.hg.1	PTPRCAP	protein tyrosine phosphatase, receptor type, C-associated protein	5790	-0.655	0.02
	TC01003490.hg.1	XCL2	chemokine (C motif) ligand 2	6846	-0.655	0.0415
	TC09001012.hg.1	AQP3	aquaporin 3 (Gill blood group)	360	-0.657	0.0124
	TC12001255.hg.1	DUSP16	dual specificity phosphatase 16	80824	-0.668	0.0257
	TC03001767.hg.1	H1FX	H1 histone family, member X	8971	-0.668	0.0161
	TC19002003.hg.1	TECR	trans-2,3-enoyl-CoA reductase	9524	-0.67	0.0212
	TC19001041.hg.1	AES	amino-terminal enhancer of split	166	-0.676	0.0227
	TC19000321.hg.1	KLF2	Kruppel-like factor 2	10365	-0.686	0.0225
	TC17001978.hg.1	CD7	CD7 molecule	924	-0.689	0.00736
	TC14000371.hg.1	PRKCH	protein kinase C, eta	5583	-0.69	0.0418
	TC02002891.hg.1	ARL4C	ADP-ribosylation factor-like 4C	10123	-0.694	0.0442
	TC17000894.hg.1	TMC8	transmembrane channel-like 8	147138	-0.703	0.015
	TC12000926.hg.1	PEBP1	phosphatidylethanolamine binding protein 1	5037	-0.705	0.0171
	TC17001459.hg.1	NR1D1	nuclear receptor subfamily 1, group D, member 1	9572	-0.719	0.0257
	TC05000657.hg.1	TCF7	transcription factor 7 (T-cell specific, HMG-box)	6932	-0.726	0.0428
	TC17000794.hg.1	PITPNC1	phosphatidylinositol transfer protein, cytoplasmic 1	26207	-0.736	0.0371
	TC11000526.hg.1	CD5	CD5 molecule	921	-0.739	0.038
	TC09000695.hg.1	SPTAN1	spectrin, alpha, non-erythrocytic 1	6709	-0.742	0.0125
	TC11002439.hg.1	ETS1	v-ets avian erythroblastosis virus E26 oncogene homolog 1	2113	-0.746	0.0243
	TC04000469.hg.1	PTPN13	protein tyrosine phosphatase, non-receptor type 13 (APO-1/CD95 (Fas)-associated phosphatase)	5783	-0.747	0.0348
	TC11001867.hg.1	AHNAK	AHNAK nucleoprotein	79026	-0.758	0.0254
	TC13001719.hg.1	FOXO1	forkhead box O1	2308	-0.763	0.0381
	TC20000942.hg.1	NFATC2	nuclear factor of activated T-cells, cytoplasmic, calcineurin-dependent 2	4773	-0.769	0.0359
	TC11002355.hg.1	BCL9L	B-cell CLL/lymphoma 9-like	283149	-0.773	0.00736
	TC19001871.hg.1	TMEM238	transmembrane protein 238	388564	-0.784	0.0192
	TC10001376.hg.1	SPOCK2	sparc/osteonectin, cwcv and kazal-like domains proteoglycan (testican) 2	9806	-0.796	0.0102
	TC12000504.hg.1	ESYT1	extended synaptotagmin-like protein 1	23344	-0.798	0.0104
	TC0X002306.hg.1	P2RY8	purinergic receptor P2Y, G-protein coupled, 8	286530	-0.818	0.0216
	TC06001531.hg.1	NCR3	natural cytotoxicity triggering receptor 3	259197	-0.819	0.00814
	TC14001497.hg.1	BCL11B	B-cell CLL/lymphoma 11B (zinc finger protein)	64919	-0.87	0.0374
	TC01003653.hg.1	B3GALT2	UDP-Gal:betaGlcNAc beta 1,3-galactosyltransferase, polypeptide 2	8707	-0.879	0.0276
	TC22000722.hg.1	IL2RB	interleukin 2 receptor, beta	3560	-0.88	0.0068
	TC09001618.hg.1	FAM102A	family with sequence similarity 102, member A	399665	-0.89	0.0405
	TC06000168.hg.1	HIST1H1E	histone cluster 1, H1e	3008	-0.98	0.018
	TC01000909.hg.1	S1PR1	sphingosine-1-phosphate receptor 1	1901	-0.997	0.0296
