# Supplementary material for: Mapping immune variation and var gene switching in naive hosts infected with Plasmodium falciparum
Source: eLife. 2021 Mar 2;10:e62800. doi: 10.7554/eLife.62800 (PMC7924948; doi:10.7554/eLife.62800)
Supplement: Supplementary file 7. — These data underpin the heatmap in Figure 2—figure supplement 1a. On sheet two we highlight the volunteers in which EdgeR identified these genes as differentially expressed. And on sheet three we look at the 21 genes that were most upregulated in inflammatory volunteers after blood challenge. [file elife-62800-supp7.xlsx]

## Sheet: 117-gene superset
			uninfected control					v1037					v1068					v1073					v1074					v1076
	ID	symbol	day -1	day 6	day 9	day 10	day 11	day -1	day 6	day 9	day 10	day 11	day -1	day 6	day 9	day 10	day 11	day -1	day 6	day 9	day 10	day 11	day -1	day 6	day 9	day 10	day 11	day -1	day 6	day 9	day 10	day 11
	ENSG00000129673	AANAT	-0.283152	-1.04059	-0.514177	-1.04951	-0.215709	-0.825091	-1.35415	-0.013344	0.257014	2.53747	-0.676149	-0.742476	0.234972	1.3881	2.15408	-0.0278819	-0.228787	0.515738	0.832598	1.78507	-1.0893	-0.936413	-0.694666	0.572862	1.1396	-0.858899	-0.808176	-0.0485847	0.0643331	-0.0747687
	ENSG00000248431	AC005150.1	0.321942	-0.236319	0.586843	0.718217	0.804289	-1.38888	-1.38115	-0.631795	0.354113	1.27249	-1.11516	-1.19368	-0.408513	0.681319	0.706607	-0.634964	-0.610176	0.634796	1.65954	1.95723	-0.747243	-0.954458	0.0400812	1.04203	1.95135	-1.27077	-1.09407	-0.698984	-0.354769	-0.00991423
	ENSG00000262633	AC005670.2	-1.31772	-1.25144	-0.150616	1.4375	0.0746145	0.716711	-1.31421	-1.36017	0.912336	0.529248	-0.254824	-1.25572	0.520714	-1.24435	1.22566	-1.14137	-1.07234	-0.325253	0.229178	1.9384	0.268034	0.330735	0.797907	1.08073	1.1408	0.411804	-0.289557	-0.669967	-1.22389	1.25704
	ENSG00000258864	AC008575.1	-0.7192	-0.86771	-0.60552	-0.0499158	0.733944	-0.723406	0.277047	0.630341	1.31997	2.24692	-0.998494	-0.850547	-0.970768	0.442033	0.433955	2.13622	-0.738287	-1.14177	1.03903	-0.308036	0.214433	-0.533498	1.33461	0.304195	1.296	-1.21004	-1.24511	-0.88877	-0.806394	0.24877
	ENSG00000224789	AC012363.1	-0.0413147	-0.730466	-0.484102	-0.778688	-0.495306	-0.59863	-0.819702	-0.263353	1.39494	2.81876	-0.790894	-0.53762	0.212057	0.704618	2.18249	-0.769138	-0.644206	-0.00619088	0.816848	1.42306	-0.81814	-0.680002	-0.645622	0.705485	1.63952	-0.755143	-0.77993	-0.45622	-0.287313	-0.515792
	ENSG00000256948	AC026369.3	-0.442708	-0.717311	0.0416179	-0.0141609	-0.316087	-0.555992	-0.704649	1.01349	1.90693	2.39103	-0.775676	-1.00738	-0.477908	0.705809	1.80585	-0.936237	-0.683551	-0.272974	1.17664	1.47555	-0.979926	-1.33201	-0.642685	0.141486	0.754091	-1.21985	-1.01355	0.263295	0.139619	0.27723
	ENSG00000250806	AC027315.1	-0.627292	-0.539681	-0.622915	-0.481649	-0.218668	-0.574261	-0.625243	-0.652335	-0.631312	2.06551	-0.492498	-0.5914	-0.590033	1.7917	2.14711	-0.473177	-0.489504	-0.476581	1.18384	1.85148	-0.624005	-0.516737	-0.658238	0.914587	2.10393	-0.516273	-0.482752	-0.6073	0.0118784	-0.578173
	ENSG00000282418	AC092811.2	-0.451904	-1.10557	-0.00156347	-0.0802037	0.00925697	-0.981473	-1.1008	-0.358426	0.712892	1.6979	-1.03062	-1.05377	0.197933	1.24631	1.61205	-0.387988	-0.187257	0.660013	1.1692	1.62998	-1.04305	-1.09541	-0.351913	0.931145	1.70973	-1.09491	-1.73976	-0.314126	0.489049	0.313292
	ENSG00000237568	AC099063.1	0.369887	-0.77963	0.126135	-0.306358	0.258606	-1.13022	-1.34928	0.197096	1.19184	1.78703	-0.951743	-1.03923	0.612074	1.3432	1.5843	-0.512989	-0.844514	0.358528	1.22312	1.33261	-1.24329	-1.23348	-0.488144	0.650678	1.25243	-1.20055	-1.44071	-0.466549	0.344024	0.355119
	ENSG00000241886	AC112496.1	-0.0744899	-0.66703	-0.730306	-0.251838	0.606065	-1.22471	-0.918963	-0.553967	1.13615	3.13186	-0.38079	-0.323907	0.200156	1.22677	1.37999	0.543215	-0.383007	0.362128	0.586126	0.998466	-1.30949	-1.12252	-0.893834	0.470491	1.34888	-0.591077	-0.874363	-1.03303	-0.401496	-0.25547
	ENSG00000234571	AC239798.2	-0.000854759	-0.649068	0.134844	-0.21185	0.0482279	-1.04705	-1.24956	0.323313	1.201	2.45326	-1.21572	-0.980872	0.178011	0.753673	1.22065	-0.873605	-1.04088	-0.300439	0.803429	0.893726	-0.902793	-0.958482	0.0346948	1.26934	2.03296	-1.17356	-1.03624	-0.248958	0.617703	-0.0748942
	ENSG00000233030	AC243772.2	0.181441	-0.653836	-0.403549	-0.238917	0.213456	-1.14378	-1.33433	-0.289426	0.974083	2.24045	-0.292614	-0.76578	0.601282	1.24384	1.71358	-0.171958	-0.839912	0.394425	0.952743	1.54347	-1.20752	-1.16012	-0.381834	0.746579	1.43565	-1.45938	-1.12927	-0.667665	0.024925	-0.126027
	ENSG00000233029	AC244453.2	0.271927	-0.635289	-0.266003	-0.279792	0.299436	-1.03679	-1.2846	-0.129603	1.0797	2.00995	-0.644339	-0.83251	0.466459	1.21882	1.57293	-0.769176	-0.793657	0.44906	1.08426	1.52626	-1.22066	-1.24301	-0.484127	0.797143	1.25388	-1.31356	-1.49401	-0.497003	0.59023	0.304073
	ENSG00000234998	AC244453.3	-0.418504	-0.937677	-0.0112913	-0.40785	0.295344	-0.698187	-0.895013	-1.29092	0.862738	2.64541	-0.843285	-0.499904	0.511999	0.532953	1.85713	-0.483438	-0.85228	0.376441	0.771028	1.42318	-1.24291	-1.05369	0.0636373	0.936516	1.35877	-0.898173	-1.19102	-0.543838	0.642646	-0.00981457
	ENSG00000102794	ACOD1	-0.547493	-0.865215	-0.578458	-0.616823	-0.799508	-0.799059	-0.794659	-0.336927	1.06743	2.54352	-0.630133	-0.658801	-0.255377	1.12225	2.05999	-0.606404	-0.518849	-0.192035	0.930955	1.57338	-0.746708	-0.71589	-0.493262	0.717058	2.03254	-0.732558	-0.756374	-0.346362	-0.0112051	-0.0450271
	ENSG00000163568	AIM2	-0.298446	-0.85453	-0.163627	-0.492895	-0.423758	-0.885601	-1.06949	0.203869	1.30064	2.12685	-0.609114	-0.957259	0.214099	1.23494	1.75336	-1.11101	-1.00191	0.204206	1.29143	1.31605	-0.739381	-0.74703	-0.0668899	0.89505	1.35912	-1.57165	-1.24509	-0.163771	0.207338	0.294508
	ENSG00000258521	AL157871.2	0.203797	-0.896279	-0.282027	-0.241691	-0.719017	-1.09233	-0.708421	-0.135134	1.02605	2.459	-0.792706	-0.843049	-0.350397	0.91371	1.77923	-0.600978	-0.778076	0.0564963	1.35397	2.05529	-0.99991	-1.04683	-0.34227	0.647276	1.36406	-0.801877	-0.696018	-0.660331	0.322705	-0.194239
	ENSG00000258666	AL157871.4	0.0426307	-0.683	-0.18529	-0.896407	-0.894544	-0.0810239	-0.88413	0.0565709	0.957904	2.50262	-0.920645	-1.1029	-0.136388	1.21644	1.84046	-1.32428	-0.998492	-0.100582	1.50703	1.33392	-0.623182	-0.587773	-0.723665	0.51233	1.17926	-0.388606	-1.10855	-0.0645263	0.874031	-0.319219
	ENSG00000225886	AL445490.1	1.00533	-0.531887	0.00678589	-0.580161	-0.180256	0.102455	-0.131294	0.841573	1.25536	2.44805	-1.48026	-1.29871	0.0390166	0.990459	1.59447	-0.413119	-0.450227	0.178804	1.03151	1.22772	-0.884204	-1.374	-0.579656	0.0212596	1.07696	-1.10979	-1.63154	-0.676903	-0.324518	-0.173221
	ENSG00000226004	AL591468.1	-0.00444398	-0.789075	-0.139771	-0.399052	-0.595537	-0.894736	-0.989314	-0.120659	0.9759	2.01299	-0.948017	-1.04291	-0.0494487	1.2849	1.77765	-0.75976	-0.732928	0.398369	1.52779	1.85119	-0.935196	-0.848439	0.0562358	0.843557	1.39507	-1.14342	-1.17304	-0.268921	-0.426062	0.137081
	ENSG00000244255	AL645922.1	-0.378638	-0.676627	-0.366014	-0.278391	-1.23505	-0.812353	-1.22794	0.714564	1.28679	2.00611	-0.882864	-1.08418	0.154117	1.02462	1.04324	-1.24372	-1.07562	0.37533	1.45731	1.65267	-1.14677	-0.53599	0.629076	0.509749	1.31342	-1.22509	-0.794837	-0.0175284	0.546926	0.267686
	ENSG00000163016	ALMS1P1	-0.60792	-0.756578	-0.267835	-0.478428	0.0534523	-0.701512	-0.515304	-0.462116	0.107462	3.25449	-0.605739	-0.864254	-0.559574	1.05135	2.69914	-0.360335	-0.768841	-0.682262	0.37881	1.40369	0.0113395	-0.0786631	-0.411761	-0.171709	1.11888	0.165181	-0.768959	-0.532994	0.171266	-0.820284
	ENSG00000152766	ANKRD22	-0.282388	-1.00874	-0.111169	-0.421871	-0.407451	-1.11502	-1.179	0.277899	1.25874	1.8997	-0.939246	-0.9651	0.306797	1.32175	1.63598	-0.99602	-0.879787	0.283579	1.21914	1.48894	-1.16137	-1.08615	-0.13073	0.789214	1.39376	-1.10284	-0.968997	-0.103563	0.509388	0.474537
	ENSG00000138772	ANXA3	0.555246	-0.24769	-1.09199	-0.682339	0.399631	-0.84605	-0.588503	-0.810902	0.531203	2.44822	0.493288	0.884927	1.03678	1.62645	2.20661	0.0335219	-0.126742	-0.36859	-0.0734061	0.586407	-0.780227	-0.83073	-0.966822	0.572404	0.951229	-0.978481	-1.17392	-1.36448	-0.520929	-0.874114
	ENSG00000100342	APOL1	-0.303646	-0.798375	-0.245163	-0.278272	-0.122906	-0.979927	-0.928913	0.269412	1.2245	2.37718	-0.745239	-0.900578	0.246643	1.33166	1.80376	-1.09845	-0.863646	0.123737	0.811441	1.27884	-1.27854	-1.10749	-0.253879	0.818412	1.46802	-1.11486	-1.09913	-0.103268	0.364363	0.104308
	ENSG00000100336	APOL4	-0.836877	-1.13986	-0.182232	-0.517112	-0.611124	-1.13213	-1.2864	0.536306	1.4677	2.07753	-1.11234	-1.08125	0.0849421	0.946051	1.4878	-0.948547	-0.892094	0.0336325	1.10453	1.33032	-0.583716	-0.767506	0.184506	0.98797	1.64149	-0.835934	-0.822626	-0.0349501	0.502676	0.399239
	ENSG00000162772	ATF3	-0.191135	-1.23509	0.00106166	-0.244157	-0.421106	-1.11118	-1.26725	0.419564	1.28751	2.21251	-0.924686	-0.97316	-0.10171	0.9975	1.47668	-1.02832	-1.03597	0.24969	1.16121	1.61788	-0.969568	-0.906494	0.091224	0.880438	1.4298	-0.86159	-0.979847	-0.112279	0.401242	0.137219
	ENSG00000129244	ATP1B2	-0.91457	-1.0038	-0.650696	-0.630541	-0.760683	-0.111033	-0.0140248	0.108561	1.38044	3.0254	-0.652222	-0.577992	-0.900028	0.161974	1.30009	-0.151615	-0.129334	0.280428	1.429	1.9363	-0.401065	-0.89466	-0.603102	0.274496	1.47761	-0.808884	-0.683469	-0.397579	-0.440589	-0.648412
	ENSG00000168062	BATF2	-0.301834	-0.884817	0.0532428	-0.0599764	0.110486	-0.962713	-1.10804	0.422451	1.21463	1.81868	-1.21499	-1.11886	0.364284	1.1133	1.45064	-1.04784	-0.807502	0.506456	1.0558	1.41933	-1.26327	-1.27346	-0.158422	0.870192	1.31703	-1.37354	-1.19227	-0.0411954	0.618192	0.474012
	ENSG00000121380	BCL2L14	-0.160722	-0.596455	-0.263585	-0.153653	-0.348432	-0.846822	-1.39483	-0.837197	0.792361	2.328	-0.189063	-0.823678	-0.344299	1.34159	2.33818	-0.806685	-0.968336	-0.233758	1.00163	2.04156	-1.09369	-0.602668	-0.275157	0.519534	1.01522	-0.439456	-0.921503	-0.270289	0.165052	0.0271624
	ENSG00000102010	BMX	-0.647128	-0.9476	-0.836916	-0.422386	-0.139406	-0.97109	-0.738127	-0.844257	0.434435	2.46956	-0.455306	0.485776	0.652081	1.62956	2.2651	-0.0571221	0.449704	0.191461	0.464549	1.47988	-0.932312	-1.05535	-1.3502	0.202302	1.24692	-0.937223	-0.479736	-0.420374	-0.234519	-0.502274
	ENSG00000173369	C1QB	0.281921	0.00465108	0.822093	0.697097	0.525834	-1.71466	-1.10697	0.269774	0.805221	1.0113	-1.08233	-1.02416	-0.0505259	0.402131	1.19203	-1.61396	-1.30627	-0.0588681	1.21621	1.31171	-1.56718	-1.36546	-0.49586	0.286921	0.467476	-0.92627	-0.48853	1.03294	0.951902	1.52183
	ENSG00000159189	C1QC	0.29625	0.0753688	0.532212	0.772691	0.720818	-1.20423	-1.45369	0.756869	1.12039	0.995252	-1.17563	-0.817924	0.153461	0.105968	1.42713	-1.23195	-1.07177	-0.465271	0.749844	1.37079	-1.56786	-1.21836	-0.783577	0.351736	0.198864	-1.25752	-0.912281	1.09333	0.786841	1.65224
	ENSG00000166278	C2	-0.23449	-1.02813	-0.114487	-0.15102	-0.311641	-0.91341	-1.37401	0.618076	1.27791	1.67514	-1.23871	-1.2277	-0.10172	0.748855	1.17833	-0.778405	-0.651831	0.697589	1.47868	1.67031	-1.27213	-1.14744	0.124444	0.916548	1.20436	-1.18734	-1.18896	0.313139	0.375249	0.642796
	ENSG00000224389	C4B	0.41465	-0.0447602	-0.0468076	-0.146153	0.239225	0.017887	0.180192	0.816429	1.13369	2.50692	-1.43819	-0.16193	-0.505281	1.15509	0.717819	0.198246	-0.240051	0.745966	-0.50376	1.31859	-0.966099	-0.88616	-1.37123	0.590293	1.19751	-0.187022	-0.762821	-1.98338	-0.0668162	-1.92204
	ENSG00000188820	CALHM6	-0.0751687	-0.699961	0.159966	-0.216351	-0.425066	-1.13478	-1.2545	0.544965	1.39596	1.8596	-1.15763	-1.23824	-0.119818	0.95262	1.27045	-1.25834	-1.0107	0.107069	1.30822	1.26026	-1.03644	-1.24403	0.028331	0.940318	1.4032	-1.13374	-0.810003	0.260505	0.661333	0.66198
	ENSG00000137757	CASP5	0.973928	-0.549564	-0.409042	-0.22981	0.510634	-1.18434	-0.832738	0.169853	1.20047	2.4216	-0.18588	0.234798	0.604725	1.36342	1.64397	-0.991301	-1.44265	-0.585246	0.280613	0.183577	-1.4569	-1.49715	-0.745695	0.851552	1.02618	-1.34603	-0.677871	-0.11513	0.470655	0.313383
	ENSG00000269720	CCDC194	0.0617014	-0.274732	-0.67318	-0.252508	0.308755	-1.23506	-0.0666812	0.0906469	0.855532	3.78607	-0.987557	-0.586682	-0.0849325	0.369158	2.10215	-0.0686111	-0.507844	-0.243728	-0.360375	1.19084	-0.849701	-0.799367	0.067108	0.404626	0.541308	-1.13866	-0.420445	-0.299964	-0.724896	-0.202964
	ENSG00000108691	CCL2	-0.379939	-0.886123	-0.199761	-0.283598	-0.674991	-0.850637	-0.698437	0.851146	1.9815	2.84779	-1.09847	-1.18186	-0.645885	0.441118	0.886695	-1.01395	-0.751428	-0.0949085	0.875826	1.03054	-0.370827	-0.813972	-0.30148	0.649506	1.98246	-0.805781	-0.426666	0.0528841	-0.00653545	-0.114225
	ENSG00000121797	CCRL2	-0.772343	-0.825648	-0.460634	-0.225113	-0.657953	-1.1332	-1.09168	0.154463	1.11804	2.58301	-0.819313	-0.980568	-0.334836	0.829707	1.63427	-1.01779	-0.357783	0.205222	1.14059	1.72416	-0.901686	-0.417285	-0.118275	0.799513	1.3482	-1.52514	-0.222199	-0.0155032	0.42395	-0.0841618
	ENSG00000120217	CD274	0.102989	-0.776469	-0.231121	-0.246883	-0.082793	-0.752563	-0.933803	0.205414	1.3729	2.46872	-0.863706	-0.887587	0.238382	1.27923	1.69144	-0.878688	-0.805072	0.0264864	0.965313	1.39672	-1.04113	-0.924545	-0.582436	0.773299	1.44629	-1.19767	-1.20453	-0.722609	0.194062	-0.029635
	ENSG00000099834	CDHR5	-0.609965	-0.889984	-0.260303	-0.917944	-0.616182	-0.614999	-0.67765	-0.0377654	0.900257	1.7631	-0.944113	-0.735042	-0.413595	1.68259	2.23579	-0.632767	-0.516647	0.12859	1.26828	1.67956	-0.914991	-0.807985	-0.639443	0.884397	1.7357	-0.436958	-1.0156	-0.545234	-0.14253	0.0914284
	ENSG00000079385	CEACAM1	0.134021	-0.761267	-0.391157	-0.285033	-0.0532705	-1.21771	-1.0513	-0.357578	0.75213	2.53197	-0.605212	-0.331441	0.261263	1.54992	2.2449	-0.534732	-0.318968	0.163722	0.912382	1.37954	-1.30275	-1.02789	-1.07626	0.66478	1.12034	-0.844826	-0.814889	-0.564167	0.000764042	-0.177295
	ENSG00000243649	CFB	-0.764313	-0.661332	-0.427334	-1.03284	-0.564547	-0.69651	-1.0813	-0.334518	1.61451	2.32743	-0.792713	-0.771882	-0.616412	0.571679	1.76227	-0.276279	-0.0932046	0.332794	1.41628	1.42252	-1.07945	-0.915649	-0.299444	1.16482	1.60108	-0.441373	-1.03431	-0.273751	-0.0734803	0.0172625
	ENSG00000205846	CLEC6A	-0.206578	-0.935013	-0.188266	-0.272447	-0.214665	-0.402681	-1.26943	-0.00860208	0.94805	2.33653	-0.985153	-1.00152	0.447477	1.60461	2.08194	-1.45682	-0.746913	-0.404805	0.647882	0.483334	-0.932702	-1.46456	-0.106341	0.584344	1.57723	-0.697094	-0.565531	0.280904	0.210572	0.656256
	ENSG00000134326	CMPK2	0.330806	-0.852632	-0.245968	-0.0805217	-0.343331	-0.413003	-0.545381	0.777895	1.45513	2.36332	-1.5206	-1.33702	-0.396306	0.909368	1.32838	-1.1071	-0.697025	0.297724	1.03153	1.48758	-1.02132	-0.935704	-0.448647	0.709332	1.31805	-1.29256	-1.02891	-0.240241	0.192074	0.305101
	ENSG00000169245	CXCL10	-0.266233	-0.894815	-0.0311772	-0.62322	-0.682987	-1.14698	-1.20255	0.402663	1.36921	2.01889	-1.14305	-1.18628	0.0239642	0.81274	1.25699	-0.953875	-0.730309	0.201339	1.22237	1.46116	-1.04593	-1.02212	0.164802	0.842511	1.68901	-0.998505	-0.827229	-0.0635254	0.697675	0.655488
	ENSG00000169248	CXCL11	-0.425325	-0.766581	-0.28852	-0.548863	-0.697746	-0.886992	-0.830959	0.247681	1.31709	2.6309	-0.960695	-0.83235	-0.462302	0.795407	1.70934	-0.879533	-0.741894	0.0491845	0.999594	1.40592	-0.829086	-0.720578	-0.252005	0.522495	2.11149	-0.807539	-0.593441	-0.574736	-0.0626621	0.372701
	ENSG00000138755	CXCL9	-0.411697	-0.643466	-0.533278	-0.57702	-0.981328	-0.980637	-1.19275	0.249652	1.14441	1.77117	-1.39701	-1.06781	0.20506	1.23302	1.59309	-1.12591	-0.901567	0.273044	1.04736	1.28851	-1.10409	-0.978579	0.314116	0.86181	1.66847	-0.639225	-0.628437	-0.0552877	0.782735	0.785654
	ENSG00000010030	ETV7	0.174666	-0.538196	0.136705	-0.0609392	0.141709	-0.738303	-0.746934	0.61512	1.39116	1.88542	-0.948205	-1.02336	0.354546	1.19602	1.42555	-1.03354	-1.01402	0.285912	1.08242	1.35867	-1.19159	-1.15766	-0.107796	0.849909	1.32161	-1.69026	-1.59936	-0.501907	0.163759	-0.0311117
	ENSG00000108950	FAM20A	-0.60747	-0.749642	-0.804085	-1.0457	-0.760903	-0.855881	-0.492872	-0.375101	0.524283	2.51389	-0.806257	-0.321284	-0.508677	1.01128	2.07641	-0.107419	-0.208982	-0.292187	1.32054	1.72204	-0.713127	-0.598988	-0.00358821	0.604385	1.86386	-1.22518	-0.710096	-0.353314	-0.0162807	-0.0796372
	ENSG00000231528	FAM225A	-0.598546	-0.989755	-0.217116	-0.106852	-0.721745	-0.833415	-1.09671	0.710726	1.37332	1.5677	-0.734826	-1.14607	0.557581	1.13433	1.50604	-1.09886	-0.837078	0.701252	1.40192	1.51889	-1.50095	-1.381	-0.202388	0.555519	0.655667	-1.00872	-0.890228	0.197821	0.908951	0.574543
	ENSG00000215784	FAM72D	0.343755	-0.511085	0.968642	-0.585307	-0.445579	-1.8391	-1.04059	-0.635427	-0.843963	1.8059	0.612098	-1.17004	0.0015109	1.56128	0.88465	-0.663827	0.796799	-0.716225	0.298275	1.34833	-1.82781	-1.56785	0.545067	0.370821	1.32987	0.163981	-0.589326	0.585445	1.03608	-0.216376
	ENSG00000150337	FCGR1A	-0.119037	-0.782431	-0.0970733	-0.246777	0.140707	-1.11596	-1.44082	0.171594	1.09183	1.83212	-0.850544	-1.01071	0.405869	1.23929	1.53598	-1.00582	-0.943674	0.239527	1.00184	1.31366	-1.10727	-1.1082	0.144304	0.947361	1.50458	-1.43533	-1.28441	-0.0565222	0.564581	0.471326
	ENSG00000198019	FCGR1B	0.0229328	-0.843226	0.00935815	-0.407586	0.221992	-1.20092	-1.38992	0.0380639	1.05879	1.69413	-0.908343	-1.01984	0.47286	1.13487	1.38984	-0.718595	-0.734428	0.36837	1.07026	1.4375	-1.21652	-1.23516	0.0108747	0.902271	1.49603	-1.4547	-1.42561	-0.0269613	0.655585	0.598099
	ENSG00000265531	FCGR1CP	0.195132	-0.569813	0.00852639	-0.149417	0.328959	-0.984674	-1.07974	0.323953	1.1768	2.03599	-1.04531	-0.981191	0.11662	1.11824	1.26682	-1.42004	-1.17972	-0.269591	0.51035	0.877637	-1.01478	-0.833494	0.38809	1.31739	1.95838	-1.33653	-1.2681	-0.327761	0.450452	0.386822
	ENSG00000172159	FRMD3	-0.189128	-1.29205	-0.299899	-0.44037	-0.629716	-1.1563	-1.37482	0.0712227	1.13008	2.10519	-0.901526	-0.899487	-0.0676458	1.06013	1.4884	-0.618705	-0.151849	0.427325	1.39442	1.48491	-1.03744	-1.06291	-0.135109	1.04673	1.41655	-0.92945	-1.23327	0.125719	0.237288	0.431724
	ENSG00000117228	GBP1	-0.309432	-0.860862	-0.04379	-0.25819	-0.283406	-1.01386	-1.14741	0.351979	1.29652	1.9661	-1.10772	-1.14423	0.240048	1.14254	1.43009	-1.09618	-0.981159	0.27223	1.12136	1.38595	-1.15072	-1.08175	0.0152846	0.874962	1.47344	-1.19028	-1.06387	0.0351227	0.668248	0.458993
	ENSG00000225492	GBP1P1	-0.304445	-1.05707	-0.0266967	-0.20947	-0.24832	-0.970426	-1.14302	0.488843	1.28563	1.97313	-1.03391	-1.18048	0.186342	1.15331	1.51476	-1.02213	-1.09617	0.196427	1.14195	1.33643	-1.17349	-1.13588	0.0996254	0.857957	1.43968	-1.08528	-1.00616	0.0439005	0.478725	0.496255
	ENSG00000162654	GBP4	-0.194286	-1.05701	-0.106187	-0.412288	-0.570064	-1.07017	-1.23842	0.30327	1.26312	2.07573	-1.05448	-1.10278	0.14263	1.22392	1.504	-1.01231	-1.07792	0.230237	1.17369	1.35936	-1.04725	-0.996251	-0.0910465	0.881158	1.42583	-0.811723	-0.932687	0.079002	0.676652	0.436284
	ENSG00000154451	GBP5	-0.113961	-0.932345	-0.0476497	-0.247228	0.0230039	-1.197	-1.33056	-0.0549143	0.996574	1.60561	-0.94082	-0.965458	0.316497	1.39556	1.66635	-1.01962	-0.950769	0.372148	1.23099	1.51124	-1.22228	-1.10357	-0.236313	0.927313	1.4932	-1.11325	-1.01291	-0.132683	0.65768	0.425155
	ENSG00000131979	GCH1	-0.566612	-0.872414	-0.414752	-0.483012	-0.871393	-1.01382	-1.09481	0.230318	1.27557	2.22475	-0.809522	-1.19932	-0.185879	1.09123	1.55801	-0.997148	-0.959681	0.171316	1.21593	1.4115	-0.824073	-0.839174	0.0313039	0.963729	1.63895	-0.925944	-0.71138	0.133704	0.501748	0.320886
	ENSG00000259169	GNRHR2P1	-1.07244	-0.109333	-1.06588	0.889535	1.08575	-1.07479	0.806294	-0.133116	1.33089	1.51849	-1.03504	-1.01808	-1.01598	1.1094	-1.05931	0.35258	-0.714167	0.300985	-0.894984	0.964616	-1.06751	0.0234343	1.84714	-1.08343	0.114351	0.965039	-1.02194	-0.922627	1.41191	0.568229
	ENSG00000139572	GPR84	-0.685437	-0.718449	-0.672792	-0.44686	-0.542441	-1.08985	-1.05778	-0.196294	1.09585	2.21811	-0.581252	-0.923616	-0.0522915	1.41494	2.06756	-0.68439	-0.496418	0.071778	1.11899	1.57258	-1.07746	-1.01381	-0.42983	0.781035	1.66674	-0.652674	-0.690617	-0.050299	0.120164	-0.0651806
	ENSG00000198785	GRIN3A	-0.467618	-0.636372	-0.340542	-0.507164	-0.451578	-0.730554	-1.1627	0.0942158	1.19816	2.52396	-0.844965	-0.954645	-0.430606	0.651508	1.62405	-0.896611	-0.713582	0.170502	1.16656	1.91254	-0.818755	-0.92701	-0.266951	0.855067	1.49802	-1.18728	-0.81603	-0.0847922	0.443112	0.100055
	ENSG00000204389	HSPA1A	-0.80449	-0.417737	-0.729691	-0.123636	-0.00875518	-0.806071	-0.602213	0.255175	1.20998	4.54363	-0.375042	-0.499754	-0.396058	0.0044045	1.22573	-0.380649	-0.215669	-0.121756	0.60521	-0.0650176	-0.673854	-0.480853	-0.282477	-0.127258	0.711943	-0.373465	-0.275321	-0.153604	-0.115971	-0.526729
	ENSG00000204388	HSPA1B	-1.16487	-0.307869	-0.51251	0.450224	-0.411904	-0.189332	0.0125174	0.814426	2.21747	3.35663	-0.487665	-1.09663	-0.840207	-0.745845	0.821008	-1.43296	-0.602158	-0.0543066	0.867532	0.154619	-0.471587	0.266481	0.0792437	0.174352	0.975004	-1.33157	0.13853	-0.173884	0.0845728	-0.589316
	ENSG00000131203	IDO1	-0.381056	-0.959969	-0.328306	-0.3849	-0.565149	-0.951577	-0.799347	-0.120766	1.16418	2.26427	-1.04412	-0.699015	-0.0813968	1.72528	1.99225	-0.839147	-0.639001	-0.254402	1.10785	1.31299	-0.878704	-0.895253	-0.289768	1.00626	1.62912	-0.782262	-0.695117	-0.461827	0.00548862	-0.1566
	ENSG00000188676	IDO2	-0.434918	-0.621162	-0.354329	-0.501521	-0.922199	-0.921522	-1.00995	0.0757836	1.17477	1.67395	-0.779296	-0.418984	-0.130449	2.17233	2.12152	-1.04795	-0.544824	-0.123706	1.30921	0.719838	-0.73564	-0.406609	-0.728119	0.995266	1.96505	-0.722937	-0.585955	-0.535407	-0.296272	-0.385971
	ENSG00000165949	IFI27	-0.31575	-0.599012	-0.457603	-0.413537	-0.711551	-0.150565	-0.391335	0.788961	1.54179	2.74247	-1.25695	-0.886191	-0.720931	0.566713	1.44765	-0.117978	0.336627	0.328933	1.07777	1.84733	-1.12698	-0.979583	-0.639522	0.436878	0.979062	-1.26186	-1.05203	-0.379893	-0.403073	-0.229842
	ENSG00000137959	IFI44L	0.593437	-0.728595	-0.0696514	-0.0832485	-0.474898	-0.0748773	-0.20074	0.955095	1.54908	2.19005	-1.48684	-1.39378	-0.579322	1.02438	1.39596	-1.01915	-0.843589	-0.00232802	1.15832	1.32959	-1.0122	-1.09811	-0.471246	0.674561	1.16213	-1.20664	-1.25298	-0.204795	-0.0533178	0.223695
	ENSG00000119917	IFIT3	0.326249	-0.711516	-0.082819	-0.0515523	0.124411	-0.458564	-0.366812	0.678117	1.26878	2.21549	-1.24981	-0.856347	0.0591117	1.07486	1.38631	-0.961926	-0.529469	0.374102	1.00402	1.33162	-1.39712	-1.39155	-0.625154	0.663478	1.20071	-1.74043	-1.46747	-0.286541	0.220483	0.249331
	ENSG00000136231	IGF2BP3	-0.229641	-1.04593	-0.375523	-0.68573	-0.130654	-0.697408	-1.09049	0.49168	1.05611	2.22755	-1.36328	-0.461915	0.200824	1.23852	1.525	-0.623819	-0.420895	0.29781	1.18844	1.25417	-1.0862	-1.19391	-0.253119	0.961125	1.5321	-1.27426	-1.33613	-0.286375	0.197467	0.384471
	ENSG00000197272	IL27	-0.208744	-1.27486	-0.252226	-0.46521	-0.675632	-0.816734	-1.17951	0.372582	1.05569	2.03495	-0.789528	-1.03634	0.0902844	1.12497	1.19177	-1.01771	-0.384287	0.108758	1.41364	1.65808	-0.993049	-1.28879	0.0282037	0.760271	1.55412	-1.15207	-1.12472	0.354418	0.584587	0.3271
	ENSG00000164509	IL31RA	-0.409015	-1.11404	-0.761723	-0.642827	-1.02107	-0.850741	-1.04416	0.0148722	0.953548	2.43381	-0.597167	-0.688018	-0.106333	1.21591	1.69059	-0.489866	-0.752634	0.30395	1.36227	1.33945	-1.04166	-0.81409	-0.143207	0.951062	1.63227	-0.843239	-0.916156	-0.274088	0.432607	0.179676
	ENSG00000177807	KCNJ10	0.193327	-0.263917	0.390922	-0.0563762	-0.115562	-0.713709	-0.804867	0.560659	1.35961	2.84387	-0.715864	-0.696506	-0.139277	1.4865	2.67803	-0.850026	-0.765288	-0.356501	0.780631	0.815992	-0.909269	-0.741689	-1.01568	-0.678529	-0.32948	-0.616317	-0.700914	-0.458076	-0.347804	0.166119
	ENSG00000156113	KCNMA1	-0.940448	-1.4172	-1.02627	-1.06221	-1.57975	-0.600155	-0.711011	0.784234	1.33169	1.20793	-0.648727	-0.338178	0.178002	1.07961	1.30615	-1.00696	-0.472258	0.439478	1.29145	1.45686	-0.65765	-0.583571	0.570961	1.35236	1.48902	-0.907738	-1.27052	-0.0506438	0.106929	0.678596
	ENSG00000151364	KCTD14	-0.674745	-0.707388	-0.393307	-0.712513	-0.583991	-0.881813	-0.670785	0.370032	1.6043	3.36087	-0.434767	-0.709687	-0.14622	0.65423	1.57958	-0.698925	-0.64777	-0.496854	0.392746	1.83157	-0.873911	-0.57118	-0.643428	0.322209	1.19454	-0.279005	-0.238912	-0.190998	-0.466272	-0.287599
	ENSG00000183762	KREMEN1	0.239288	-0.128695	-0.324079	-0.0919923	0.480207	-1.65052	-1.33219	-0.735237	0.317739	1.27496	0.158716	0.557395	0.895909	1.63694	2.20682	-0.275536	-0.138513	0.415689	1.05245	1.4474	-1.72239	-1.41379	-1.20876	0.0362586	0.585419	-1.14589	-1.11313	-0.415263	0.402675	-0.011867
	ENSG00000218153	KRT18P22	-0.375826	-0.792577	-0.561647	-0.514548	-0.775056	-0.774624	-0.770381	0.755105	0.836805	3.31811	-0.743484	-0.730172	-0.109735	1.52278	1.57566	-0.723063	-0.604336	-0.424915	0.480307	1.13536	-0.768927	-0.638569	0.0566511	0.561694	1.46434	-0.70988	-0.733204	0.029397	-0.271051	-0.714217
	ENSG00000078081	LAMP3	0.361596	-0.843287	-0.290121	-0.341337	-0.628923	-0.635285	-0.544492	0.399116	1.24739	2.82413	-1.2027	-1.04978	-0.469469	1.36682	1.78488	-0.792204	-0.790375	-0.111574	0.890107	1.50284	-0.612891	-0.496797	-0.592569	0.672586	1.25165	-0.856555	-0.902131	-0.576395	-0.303152	-0.261072
	ENSG00000002549	LAP3	-0.276738	-0.967596	-0.121276	-0.352347	-0.36321	-0.852808	-0.900442	0.614885	1.40959	2.04504	-1.37621	-1.54299	-0.184093	0.786504	1.12914	-0.950144	-0.896994	0.272695	1.17246	1.29926	-1.02273	-1.10594	0.199709	0.956943	1.5637	-1.03105	-0.992005	0.206825	0.693308	0.58652
	ENSG00000223387	LINC02068	-0.427361	-0.795146	-0.217024	-0.697188	-0.432035	-0.648777	-0.759193	0.117793	1.69493	3.21846	-0.477449	-0.694172	-0.336175	-0.323415	-0.0211431	-0.815046	-0.490187	0.325004	1.28596	1.5436	-0.317426	-0.545903	-0.13759	1.13749	1.88117	-0.661376	-0.829707	-0.378746	-0.53097	-0.668386
	ENSG00000260943	LINC02555	0.233611	-0.631755	-0.241215	-0.611723	0.0966359	-0.932415	-1.01185	-0.171057	0.776212	2.06378	-0.45715	-0.185829	0.348987	1.66355	2.08754	-1.07318	-0.889818	-0.0731412	1.08669	1.04447	-0.834951	-0.845111	-0.0821928	1.1762	1.48623	-1.53548	-1.29242	-0.583972	-0.452301	-0.158351
	ENSG00000173239	LIPM	-0.567464	-0.864183	-0.215122	-0.630103	-0.571214	-0.961565	-0.913442	0.170994	1.43935	2.33473	-0.718841	-0.776682	0.265997	1.64869	2.00228	-0.85102	-0.851912	-0.489513	0.367593	0.628078	-0.653889	-0.892283	-0.254682	0.912093	1.74132	-1.02781	-0.908736	-0.388936	0.530936	0.49534
	ENSG00000170439	METTL7B	-0.421509	-0.542386	-0.654476	-0.773947	0.207957	-0.503161	-0.939311	-0.487679	0.0907268	1.86647	-0.518851	-0.873246	-0.40235	1.60629	2.85586	-0.659616	-0.326824	0.06766	0.747625	1.78663	-0.839108	-0.113663	-0.296411	-0.0985017	1.98549	-0.734811	-0.678709	-0.447541	-0.445068	-0.457548
	ENSG00000138119	MYOF	-0.937418	-1.31661	-0.792722	-1.09021	-1.04474	-0.875078	-0.751488	0.448534	1.25254	1.97527	-0.850684	-0.764929	-0.00711629	1.17873	1.61982	-0.909282	-0.612892	0.317138	1.25546	1.39867	-0.855901	-0.607593	0.237399	0.951789	1.48498	-1.12098	-0.603937	0.110742	0.421367	0.489154
	ENSG00000144035	NAT8	-0.207698	-0.531825	-0.492718	-0.126903	-0.0771723	-0.353587	-0.656656	-0.546441	0.605537	3.79224	-0.620696	-0.60292	-0.431407	0.774514	2.55706	-0.42284	-0.0484106	-0.515375	0.671604	0.500214	-0.343435	-0.480813	-0.707973	0.0365387	1.03544	-0.575847	-0.785371	-0.463767	-0.399652	-0.581632
	ENSG00000064300	NGFR	-0.19861	-0.776322	-0.148058	-0.455411	-0.390675	-1.17374	-1.27414	0.128664	1.27506	1.02811	-0.773711	-1.17823	-0.421673	0.436954	0.86427	-1.04554	-0.701944	0.39864	2.04474	2.18472	-0.84348	-1.13988	-0.329452	1.50964	1.41763	-0.975607	-0.745439	0.440769	0.352975	0.48974
	ENSG00000124785	NRN1	-0.283489	-0.936134	-0.954374	-0.613271	-0.771402	-1.01639	-1.09777	-0.638942	0.54943	2.32809	-0.847753	-1.04859	-0.172732	1.29648	2.30732	-0.549943	-0.918211	-0.0314072	0.791317	1.28657	-0.115044	-0.227516	-0.196593	1.14019	1.91482	-0.333476	-0.276104	-0.48388	-0.138493	0.0372942
	ENSG00000174944	P2RY14	0.0817817	-0.943984	-0.256107	-0.228375	-0.287786	-0.713299	-0.586819	-0.0565128	1.10272	2.47479	-1.14369	-0.630014	0.0255841	1.50767	1.82191	-0.741408	-0.568729	-0.102225	1.2256	1.50398	-0.981427	-0.973392	-0.77217	0.723014	1.4198	-1.00478	-0.956813	-0.88407	0.0240995	-0.0793517
	ENSG00000197646	PDCD1LG2	-0.363913	-0.868031	-0.298477	-0.732944	-0.575685	-0.697375	-0.743315	0.141001	1.3149	2.46552	-0.986998	-0.82464	-0.271393	0.979537	1.58778	-0.779898	-0.81335	0.0296626	1.04154	1.51167	-0.713426	-0.744235	-0.0655267	1.13439	1.91243	-1.10225	-0.971158	-0.457358	0.113671	-0.222128
	ENSG00000114698	PLSCR4	-0.51666	-0.768507	-0.50396	-0.873364	-0.522265	-1.184	-0.510721	0.277631	0.819358	3.10316	-0.662855	-0.199618	-0.866986	0.577818	1.54208	-0.179745	-0.357389	-0.749978	0.726609	1.23541	0.0635	-0.180007	-0.23786	0.509917	2.38342	-0.360311	-0.418538	-0.458229	-1.08849	-0.59942
	ENSG00000279296	PRAL	0.170624	-0.749491	-0.698568	-0.811687	-0.531171	-0.131772	-0.87418	0.419043	1.39989	2.50328	0.205105	-0.116022	-0.485167	0.66091	0.837232	-1.44403	-1.02432	0.012294	2.2332	1.52271	-1.64456	-0.437194	-0.719014	0.397048	0.356506	-0.662303	-0.785643	-0.732401	0.563254	0.56643
	ENSG00000152229	PSTPIP2	-0.465953	-1.05491	-0.367257	-0.559824	-0.367123	-1.14476	-1.02003	0.112552	1.26759	2.00977	-1.13716	-0.906765	0.326061	1.26814	1.71806	-0.927937	-0.578378	0.305374	1.23503	1.33842	-1.02384	-0.976845	-0.0297631	0.837547	1.58776	-1.18259	-0.863676	-0.160861	0.333875	0.427473
	ENSG00000171570	RAB4B-EGLN2	-1.44038	-0.424305	-0.274497	-1.37524	-0.153066	-1.44331	0.974782	-1.48689	1.87639	1.4776	-0.201053	-1.37226	-0.155413	0.647694	0.0234656	0.5327	-1.16981	0.752154	1.51309	0.264711	0.417993	0.12363	0.73332	0.622265	0.654985	0.695279	1.08847	-0.218385	-1.3372	-1.34673
	ENSG00000090104	RGS1	-0.0844456	-1.12213	-0.341375	-0.888093	-0.883511	-0.969398	-0.485386	-0.14033	0.776174	2.38996	-0.910665	-0.93097	-0.0630714	1.64017	1.88125	-0.428294	-0.631459	-0.485491	0.884674	1.29208	-0.25098	-0.787566	0.161192	0.994534	1.89602	0.113488	-1.11811	-0.557855	-0.375006	-0.575419
	ENSG00000175643	RMI2	-0.517609	-0.909022	-0.524097	-0.340734	-0.626113	-0.287691	-0.554617	0.187306	1.36627	2.35292	-0.959675	-0.718059	-0.00616372	1.30734	2.01493	-1.0907	-1.0953	-0.816538	0.64524	1.18676	-0.243403	-0.322635	0.0964221	1.16406	1.76053	-0.751666	-1.0025	-0.975128	-0.136347	-0.203789
	ENSG00000183638	RP1L1	-0.294696	-0.585697	-0.556063	-0.514029	-0.564855	-0.297543	-0.290972	0.29087	1.06108	3.62964	-0.121444	0.142013	0.145311	-0.658493	-0.153958	-0.356639	0.116597	0.509824	1.10129	2.80522	-0.704054	-0.241884	-0.474145	-0.71634	-0.44621	-0.488025	-0.515401	-0.684661	-0.48614	-0.650602
	ENSG00000134321	RSAD2	0.644425	-0.486845	0.012933	0.267724	-0.000773933	-0.162621	-0.345628	0.767437	1.39453	2.48011	-1.313	-1.27267	-0.416706	0.951906	1.46023	-1.06947	-0.832623	0.0987239	0.838697	1.37491	-1.12919	-1.01556	-0.706964	0.619193	1.2104	-1.40958	-1.22495	-0.535337	-0.0829532	-0.116332
	ENSG00000020577	SAMD4A	-0.510489	-1.07446	-0.329567	-0.328049	-0.992309	-0.818479	-1.11454	0.58179	1.4441	1.94363	-1.01884	-1.39159	-0.0836953	0.842147	1.16715	-1.03369	-0.774911	0.349516	1.35948	1.58022	-0.813674	-0.628318	0.194047	0.964877	1.52276	-1.13725	-0.946219	0.0808587	0.676753	0.288752
	ENSG00000108387	SEPT4	-0.140156	-0.905453	-0.302092	-0.429813	-0.127529	-0.754899	-0.888669	0.119205	1.27915	2.60914	-0.554508	-0.568954	-0.0852263	1.30146	2.16005	-0.751848	-0.649511	-0.259076	0.711247	1.49694	-0.87183	-0.685715	-0.529519	0.678584	1.53843	-0.962614	-1.13993	-0.726573	-0.243488	-0.316808
	ENSG00000149131	SERPING1	0.161339	-0.843539	-0.0800785	-0.0579319	-0.0152915	-0.684126	-0.812715	0.679911	1.3748	1.95896	-1.13021	-0.983431	0.116197	1.11239	1.46521	-1.07069	-0.927159	0.30042	1.13185	1.41764	-1.29158	-1.32638	-0.179831	0.827325	1.26924	-1.47086	-1.35701	-0.101608	0.274663	0.242491
	ENSG00000158714	SLAMF8	-0.490813	-0.845603	-0.0630117	-0.256377	-0.391846	-1.13757	-1.18364	0.18541	1.09612	1.90419	-0.903746	-0.922178	0.211433	1.19346	1.68701	-1.1585	-1.01094	0.168992	1.29278	1.47735	-1.0338	-0.961049	-0.0816404	0.786439	1.51211	-1.177	-1.04938	0.0179764	0.53889	0.594949
	ENSG00000111181	SLC6A12	-0.568014	-0.947234	-0.271235	-0.404592	-0.461404	-0.846277	-1.10069	0.360383	1.40172	1.95001	-0.957986	-1.25128	-0.240495	0.938207	1.43688	-0.656629	-0.546132	0.470216	1.54113	1.67907	-1.44348	-0.94627	-0.181533	0.797298	1.33078	-1.18383	-0.829471	0.0880939	0.382882	0.459866
	ENSG00000145147	SLIT2	-0.562392	-0.600774	-0.907658	-0.993736	-0.67809	-0.917875	-0.911663	-0.149879	1.35427	2.6978	-0.872319	-0.597621	-0.256751	1.43512	2.22801	-0.710218	-0.831056	-0.351394	0.384241	0.941033	-0.785133	-0.718906	-0.738339	0.563296	1.18135	-0.440144	-0.373717	0.39158	0.436404	0.78455
	ENSG00000181625	SLX1B	-0.695407	-0.517413	0.00226481	0.473081	-0.0296893	0.392611	-1.19521	0.482699	1.01403	0.701355	-0.708771	-2.18189	0.762017	-2.01513	0.17801	1.02045	0.692131	0.952154	1.31861	1.0759	-2.32873	-1.66847	0.40376	0.58683	0.00094885	-0.21032	0.188483	0.587481	0.232977	0.485239
	ENSG00000214872	SMTNL1	0.134204	-0.990573	-0.472869	-0.610101	-0.39886	-0.134557	-0.515577	0.883055	1.72958	2.55786	-0.382368	-0.283728	0.659912	1.60373	1.89119	-0.960674	-0.834351	-0.042709	0.581771	0.954214	-1.29241	-1.35921	-0.731265	0.206938	0.419583	-0.891252	-1.32334	-0.372399	-0.0886625	0.062851
	ENSG00000185338	SOCS1	-0.609088	-0.641328	-0.3879	-0.0976415	-0.61814	-0.596222	-0.602671	0.00876856	1.32124	2.8419	-0.979165	-1.0369	-0.35168	0.9343	1.75999	-0.928457	-0.650743	-0.250853	0.83913	1.7874	-0.719765	-0.494286	-0.194031	0.741981	1.55976	-0.866809	-0.704741	-0.803321	0.0254478	-0.286182
	ENSG00000198959	TGM2	-0.365202	-1.20116	-0.243249	-0.600967	-0.715003	-1.16306	-1.15404	0.337223	1.27352	2.2358	-0.785831	-0.654267	-0.32167	0.993078	1.40834	-0.568195	-0.316785	0.0833018	1.17041	1.37101	-1.36539	-1.2818	-0.258954	1.25213	1.37362	-1.00561	-0.788868	0.382202	0.292249	0.61718
	ENSG00000248592	TMEM110-MUSTN1	-1.2022	-1.2292	0.773545	-1.14677	-1.2053	-1.20471	0.796097	-0.0847155	0.771852	1.457	-1.16232	-1.14423	-1.142	1.23054	1.66877	0.822189	-0.739626	0.982085	0.0679386	0.347511	-0.154823	-1.01981	0.2879	1.04453	1.54308	0.272899	-1.14835	1.05004	-0.396476	-0.135458
	ENSG00000123610	TNFAIP6	-0.0243774	-0.887956	-0.59899	-0.451272	-0.39326	-0.610328	-0.632009	0.215561	1.44922	2.75109	-0.658663	-0.398452	0.197874	1.53303	1.78144	-0.810382	-0.565915	-0.148742	0.684543	1.13943	-1.09942	-1.11968	-0.735299	0.832904	1.34034	-1.12964	-0.973352	-0.601931	-0.00799264	-0.077774
	ENSG00000213886	UBD	-0.60769	-0.62397	-0.169362	-0.574227	-0.609557	-0.609202	-0.605713	-0.2206	-0.611561	3.11452	-0.583619	-0.572696	-0.333935	1.17013	2.60218	-0.566867	-0.469955	0.832705	1.10733	1.07095	-0.604517	-0.497805	-0.637217	-0.614757	1.32824	-0.556065	-0.575184	0.062397	-0.554747	-0.0892125
	ENSG00000182168	UNC5C	-0.436999	-0.225162	-0.430072	-0.382023	-0.440058	-0.439476	0.267159	0.57933	0.456684	4.68359	-0.397482	-0.659229	-0.65771	-0.651998	-0.689102	-0.652659	0.105604	-0.290531	1.09947	0.574804	-0.695033	-0.574582	0.174068	-0.448574	-0.0180052	-0.352056	-0.121783	0.534722	-0.0781362	0.165238
	ENSG00000168899	VAMP5	-0.522344	-0.805935	-0.252614	-0.357442	-0.420424	-0.971118	-0.994628	0.439769	1.37029	2.16653	-0.916283	-1.14974	-0.18687	1.0544	1.47034	-0.987628	-0.817142	0.213378	1.33608	1.5825	-0.785998	-0.848375	0.165246	1.05501	1.48901	-1.18141	-1.20061	-0.122745	0.106328	0.0724332
	ENSG00000140105	WARS	-0.331069	-0.968771	-0.172862	-0.501589	-0.566432	-1.00862	-1.06339	0.397325	1.29116	1.90607	-1.28757	-1.31339	-0.0843678	1.07638	1.46148	-1.07225	-0.957474	0.219961	1.25355	1.39726	-0.965377	-0.936611	0.14207	1.01304	1.54187	-0.931827	-0.824887	0.2086	0.623603	0.454109
	ENSG00000212643	ZRSR2P1	0.663499	-0.787153	-0.276054	-0.725826	0.750492	-0.768854	0.166262	-0.41572	-0.771772	2.38598	-0.737342	2.40727	1.49619	-0.716104	1.72184	-0.716821	-0.5993	-0.658525	-0.627883	1.51143	-0.655426	-0.632919	-0.803642	0.206062	0.513857	-0.275536	0.499064	-0.743081	-0.702021	-0.707964

## Sheet: EdgeR differential expression
			n = 1	n = 100	n = 62	n = 45	n = 51	n = 10
	ID	symbol	control	v1037	v1068	v1073	v1074	v1076
	ENSG00000129673	AANAT							< black square indicates that the gene was called as differentially expressed by EdgeR
	ENSG00000248431	AC005150.1
	ENSG00000262633	AC005670.2
	ENSG00000258864	AC008575.1
	ENSG00000224789	AC012363.1
	ENSG00000256948	AC026369.3
	ENSG00000250806	AC027315.1
	ENSG00000282418	AC092811.2
	ENSG00000237568	AC099063.1
	ENSG00000241886	AC112496.1
	ENSG00000234571	AC239798.2
	ENSG00000233030	AC243772.2
	ENSG00000233029	AC244453.2
	ENSG00000234998	AC244453.3
	ENSG00000102794	ACOD1
	ENSG00000163568	AIM2
	ENSG00000258521	AL157871.2
	ENSG00000258666	AL157871.4
	ENSG00000225886	AL445490.1
	ENSG00000226004	AL591468.1
	ENSG00000244255	AL645922.1
	ENSG00000163016	ALMS1P1
	ENSG00000152766	ANKRD22
	ENSG00000138772	ANXA3
	ENSG00000100342	APOL1
	ENSG00000100336	APOL4
	ENSG00000162772	ATF3
	ENSG00000129244	ATP1B2
	ENSG00000168062	BATF2
	ENSG00000121380	BCL2L14
	ENSG00000102010	BMX
	ENSG00000173369	C1QB
	ENSG00000159189	C1QC
	ENSG00000166278	C2
	ENSG00000224389	C4B
	ENSG00000188820	CALHM6
	ENSG00000137757	CASP5
	ENSG00000269720	CCDC194
	ENSG00000108691	CCL2
	ENSG00000121797	CCRL2
	ENSG00000120217	CD274
	ENSG00000099834	CDHR5
	ENSG00000079385	CEACAM1
	ENSG00000243649	CFB
	ENSG00000205846	CLEC6A
	ENSG00000134326	CMPK2
	ENSG00000169245	CXCL10
	ENSG00000169248	CXCL11
	ENSG00000138755	CXCL9
	ENSG00000010030	ETV7
	ENSG00000108950	FAM20A
	ENSG00000231528	FAM225A
	ENSG00000215784	FAM72D
	ENSG00000150337	FCGR1A
	ENSG00000198019	FCGR1B
	ENSG00000265531	FCGR1CP
	ENSG00000172159	FRMD3
	ENSG00000117228	GBP1
	ENSG00000225492	GBP1P1
	ENSG00000162654	GBP4
	ENSG00000154451	GBP5
	ENSG00000131979	GCH1
	ENSG00000259169	GNRHR2P1
	ENSG00000139572	GPR84
	ENSG00000198785	GRIN3A
	ENSG00000204389	HSPA1A
	ENSG00000204388	HSPA1B
	ENSG00000131203	IDO1
	ENSG00000188676	IDO2
	ENSG00000165949	IFI27
	ENSG00000137959	IFI44L
	ENSG00000119917	IFIT3
	ENSG00000136231	IGF2BP3
	ENSG00000197272	IL27
	ENSG00000164509	IL31RA
	ENSG00000177807	KCNJ10
	ENSG00000156113	KCNMA1
	ENSG00000151364	KCTD14
	ENSG00000183762	KREMEN1
	ENSG00000218153	KRT18P22
	ENSG00000078081	LAMP3
	ENSG00000002549	LAP3
	ENSG00000223387	LINC02068
	ENSG00000260943	LINC02555
	ENSG00000173239	LIPM
	ENSG00000170439	METTL7B
	ENSG00000138119	MYOF
	ENSG00000144035	NAT8
	ENSG00000064300	NGFR
	ENSG00000124785	NRN1
	ENSG00000174944	P2RY14
	ENSG00000197646	PDCD1LG2
	ENSG00000114698	PLSCR4
	ENSG00000279296	PRAL
	ENSG00000152229	PSTPIP2
	ENSG00000171570	RAB4B-EGLN2
	ENSG00000090104	RGS1
	ENSG00000175643	RMI2
	ENSG00000183638	RP1L1
	ENSG00000134321	RSAD2
	ENSG00000020577	SAMD4A
	ENSG00000108387	SEPT4
	ENSG00000149131	SERPING1
	ENSG00000158714	SLAMF8
	ENSG00000111181	SLC6A12
	ENSG00000145147	SLIT2
	ENSG00000181625	SLX1B
	ENSG00000214872	SMTNL1
	ENSG00000185338	SOCS1
	ENSG00000198959	TGM2
	ENSG00000248592	TMEM110-MUSTN1
	ENSG00000123610	TNFAIP6
	ENSG00000213886	UBD
	ENSG00000182168	UNC5C
	ENSG00000168899	VAMP5
	ENSG00000140105	WARS
	ENSG00000212643	ZRSR2P1

## Sheet: comparison to blood challenge
							n = 0	n = 18	n = 17	n = 14	n = 16	n = 4
		symbol	description	log FC	adj p		control	v1037	v1068	v1073	v1074	v1076	< mosquito challenge
	1	CXCL10	chemokine (C-X-C motif) ligand 10	4.64101	1.19e-11
	2	ANKRD22	ankyrin repeat domain 22	4.26778	3.55e-12
	3	SERPING1	serpin peptidase inhibitor, clade G (C1 inhibitor), member 1	3.45839	2.44e-09
	4	FCGR1A	Fc fragment of IgG, high affinity Ia, receptor (CD64)	3.33943	2.89e-09
	5	IFI44L	interferon-induced protein 44-like	3.28562	0.000122301
	6	FCGR1C	Fc fragment of IgG, high affinity Ic, receptor (CD64), pseudogene	3.24683	5.14e-09
	7	FCGR1B	Fc fragment of IgG, high affinity Ib, receptor (CD64)	3.16636	3.36e-09
	8	CD274	CD274 molecule	3.11219	1.33e-11
	9	P2RY14	purinergic receptor P2Y, G-protein coupled, 14	2.97906	6.43e-12
	10	RSAD2	radical S-adenosyl methionine domain containing 2	2.85349	0.000131374
	11	GBP1	guanylate binding protein 1, interferon-inducible	2.74049	6.48e-09
	12	GBP5	guanylate binding protein 5	2.63407	2.57e-08
	13	TNFAIP6	tumor necrosis factor, alpha-induced protein 6	2.58718	3.13e-07
	14	GBP4	guanylate binding protein 4	2.51661	1.74e-09
	15	GBP1P1	guanylate binding protein 1, interferon-inducible pseudogene 1	2.49644	2.06e-10
	16	CARD17	caspase recruitment domain family, member 17	2.42341	2.13e-08
	17	IFIT3	interferon-induced protein with tetratricopeptide repeats 3	2.3777	1.3e-05
	18	IFI44	interferon-induced protein 44	2.34527	0.000698197
	19	IDO1	indoleamine 2,3-dioxygenase 1	2.30515	3.48e-11
	20	MYOF	myoferlin	2.27082	2.52e-10
	21	CXCL9	chemokine (C-X-C motif) ligand 9	2.26348	5.8e-13
		^ top 21 upregulated genes @ diagnosis in the inflammatory group [ blood challenge ]						^ black square indicates that the gene was called as differentially expressed by EdgeR
