# Supplementary material for: Mapping immune variation and var gene switching in naive hosts infected with Plasmodium falciparum
Source: eLife. 2021 Mar 2;10:e62800. doi: 10.7554/eLife.62800 (PMC7924948; doi:10.7554/eLife.62800)
Supplement: Supplementary file 8. — GO terms are arranged into their functional groups and groups are ordered by size. On sheet two we highlight the top 20 GO terms as ordered by p value. [file elife-62800-supp8.xlsx]

## Sheet: 117-gene superset GO goups
GO term	GO ID	GO term p value (Bonferroni step down corrected)	number of associated genes	associated genes	% of associated genes	GO levels	ontology source	GO group	group p value (Bonferroni step down corrected)
tolerance induction	GO:0002507	0.00889374	3	[ACOD1, CD274, IDO1]	9.67742	[2, 3, 5, 6]	GO_BiologicalProcess	[Group10]	3.67e-09
positive regulation of type 2 immune response	GO:0002830	0.0290037	2	[IDO1, RSAD2]	11.7647	[4, 5, 6]	GO_BiologicalProcess	[Group10]	3.67e-09
negative regulation of interleukin-10 production	GO:0032693	0.00530905	3	[CD274, IDO1, PDCD1LG2]	12	[4, 5, 6]	GO_BiologicalProcess	[Group10]	3.67e-09
T-helper 2 cell cytokine production	GO:0035745	0.0270374	2	[IL31RA, RSAD2]	13.3333	[4, 6, 8]	GO_BiologicalProcess	[Group10]	3.67e-09
tryptophan catabolic process to kynurenine	GO:0019441	0.00728106	2	[IDO1, IDO2]	33.3333	[5, 6, 7, 8, 9, 10]	GO_BiologicalProcess	[Group10]	3.67e-09
indolalkylamine metabolic process	GO:0006586	0.00225098	3	[AANAT, IDO1, IDO2]	16.6667	[5, 6, 7]	GO_BiologicalProcess	[Group10]	3.67e-09
'de novo' NAD biosynthetic process from tryptophan	GO:0034354	0.00923815	2	[IDO1, IDO2]	28.5714	[6, 7, 8, 9, 10, 11, 12, 13]	GO_BiologicalProcess	[Group10]	3.67e-09
tryptophan 2,3-dioxygenase activity	GO:0004833	0.00359655	2	[IDO1, IDO2]	50	[6]	GO_BiologicalProcess	[Group10]	3.67e-09
indoleamine 2,3-dioxygenase activity	GO:0033754	0.000670171	2	[IDO1, IDO2]	100	[6]	GO_BiologicalProcess	[Group10]	3.67e-09
negative regulation of endoplasmic reticulum stress-induced intrinsic apoptotic signaling pathway	GO:1902236	0.0404491	2	[HSPA1A, HSPA1B]	7.69231	[4, 5, 6, 7, 8, 9, 10]	GO_BiologicalProcess	[Group09]	0.0336
microtubule nucleation	GO:0007020	0.0164991	3	[HSPA1A, HSPA1B, LAP3]	7.31707	[4, 5, 6, 8]	GO_BiologicalProcess	[Group09]	0.0336
negative regulation of inclusion body assembly	GO:0090084	0.0235776	2	[HSPA1A, HSPA1B]	15.3846	[4, 5, 6]	GO_BiologicalProcess	[Group09]	0.0336
positive regulation of endoribonuclease activity	GO:1902380	0.000670171	2	[HSPA1A, HSPA1B]	100	[5, 6, 7, 8, 9, 10, 11]	GO_BiologicalProcess	[Group09]	0.0336
regulation of mitotic spindle assembly	GO:1901673	0.0389642	2	[HSPA1A, HSPA1B]	7.14286	[5, 6, 7, 8, 9, 10]	GO_BiologicalProcess	[Group09]	0.0336
negative regulation of extrinsic apoptotic signaling pathway in absence of ligand	GO:2001240	0.0193741	2	[HSPA1A, HSPA1B]	4.44444	[5, 6, 7, 8, 9, 10]	GO_BiologicalProcess	[Group09]	0.0336
cellular heat acclimation	GO:0070370	0.00509042	2	[HSPA1A, HSPA1B]	40	[5, 6]	GO_BiologicalProcess	[Group09]	0.0336
positive regulation of nucleotide-binding oligomerization domain containing 2 signaling pathway	GO:0070434	0.00193748	2	[HSPA1A, HSPA1B]	66.6667	[6, 7, 8, 9, 10, 11, 12, 13, 14, 15]	GO_BiologicalProcess	[Group09]	0.0336
positive regulation of defense response to virus by host	GO:0002230	0.0340635	2	[AIM2, IL27]	5.88235	[5, 6, 7, 8, 9]	GO_BiologicalProcess	[Group08]	0.00134
pyrimidine nucleotide biosynthetic process	GO:0006221	0.0288447	3	[ACOD1, CMPK2, CXCL9]	4.83871	[6, 7, 8, 9]	GO_BiologicalProcess	[Group08]	0.00134
cellular response to interferon-beta	GO:0035458	0.0404491	2	[ACOD1, AIM2]	7.69231	[6]	GO_BiologicalProcess	[Group08]	0.00134
'de novo' pyrimidine nucleobase biosynthetic process	GO:0006207	0.0191181	2	[ACOD1, CXCL9]	18.1818	[7, 8, 9]	GO_BiologicalProcess	[Group08]	0.00134
pyrimidine nucleoside triphosphate biosynthetic process	GO:0009148	0.0379941	2	[ACOD1, CMPK2]	6.45161	[7, 8, 9]	GO_BiologicalProcess	[Group08]	0.00134
cytidylate kinase activity	GO:0004127	0.00728106	2	[CMPK2, CXCL9]	33.3333	[8, 9, 10, 11]	GO_BiologicalProcess	[Group08]	0.00134
UMP biosynthetic process	GO:0006222	0.0235776	2	[ACOD1, CXCL9]	15.3846	[8, 9, 10, 11]	GO_BiologicalProcess	[Group08]	0.00134
uridylate kinase activity	GO:0009041	0.00509042	2	[CMPK2, CXCL9]	40	[8, 9, 10, 11]	GO_BiologicalProcess	[Group08]	0.00134
negative regulation of T cell receptor signaling pathway	GO:0050860	0.0281105	2	[CEACAM1, GBP1]	5.26316	[4, 5, 6, 7, 8, 9, 10, 11, 12]	GO_BiologicalProcess	[Group07]	3.76e-06
regulation of immune response to tumor cell	GO:0002837	0.0290037	2	[CD274, CEACAM1]	11.7647	[4, 5, 6]	GO_BiologicalProcess	[Group07, Group10]	3.76e-06
negative regulation of vascular permeability	GO:0043116	0.0290037	2	[CEACAM1, SLIT2]	11.7647	[4, 6]	GO_BiologicalProcess	[Group07]	3.76e-06
negative regulation of granulocyte differentiation	GO:0030853	0.0191181	2	[C1QC, CEACAM1]	18.1818	[6, 7, 8, 9, 10, 11, 12]	GO_BiologicalProcess	[Group07]	3.76e-06
negative regulation of CD8-positive, alpha-beta T cell activation	GO:2001186	0.00728106	2	[CD274, SOCS1]	33.3333	[7, 8, 9, 10]	GO_BiologicalProcess	[Group07, Group10]	3.76e-06
positive regulation of T cell apoptotic process	GO:0070234	0.0289949	2	[CD274, IDO1]	10.5263	[8, 9, 10]	GO_BiologicalProcess	[Group07, Group10]	3.76e-06
negative regulation of leukocyte chemotaxis	GO:0002689	0.00889374	3	[CCL2, SLAMF8, SLIT2]	9.67742	[4, 5, 6, 7, 8, 9]	GO_BiologicalProcess	[Group06]	2.55e-07
myoblast fusion	GO:0007520	0.022495	3	[CXCL10, CXCL9, MYOF]	6	[4, 5, 6, 7]	GO_BiologicalProcess	[Group06]	2.55e-07
monocyte chemotaxis	GO:0002548	0.0147465	4	[CCL2, CXCL10, SLAMF8, SLIT2]	4.54545	[4, 6, 7]	GO_BiologicalProcess	[Group06]	2.55e-07
positive regulation of calcium ion transmembrane transport	GO:1904427	0.0190681	4	[CXCL10, CXCL11, CXCL9, STIMATE-MUSTN1]	4.0404	[5, 6, 7, 8, 9, 10, 11]	GO_BiologicalProcess	[Group06]	2.55e-07
chemokine-mediated signaling pathway	GO:0070098	0.000530647	6	[CCL2, CCRL2, CXCL10, CXCL11, CXCL9, SLIT2]	5.26316	[5, 6, 7]	GO_BiologicalProcess	[Group06]	2.55e-07
response to interferon-gamma	GO:0034341	8.66064e-07	11	[ACOD1, CCL2, FCGR1A, FCGR1B, FCGR1CP, GBP1, GBP4, GBP5, GCH1, SOCS1, UBD]	4.43548	[4, 5]	GO_BiologicalProcess	[Group05]	2.55e-07
interferon-gamma-mediated signaling pathway	GO:0060333	0.00485844	5	[FCGR1A, FCGR1B, FCGR1CP, GBP1, SOCS1]	4.46429	[5, 6, 7]	GO_BiologicalProcess	[Group05]	2.55e-07
cellular response to interferon-gamma	GO:0071346	3.89368e-05	9	[ACOD1, CCL2, FCGR1A, FCGR1B, FCGR1CP, GBP1, GBP4, GBP5, SOCS1]	4	[5, 6]	GO_BiologicalProcess	[Group05]	2.55e-07
potassium ion homeostasis	GO:0055075	0.0115569	3	[ATP1B2, KCNJ10, KCNMA1]	8.57143	[8]	GO_BiologicalProcess	[Group04]	0.00243
apoptotic cell clearance	GO:0043277	0.00376541	4	[C2, C4B, CCL2, TGM2]	7.14286	[6]	GO_BiologicalProcess	[Group03]	0.000869
myeloid dendritic cell differentiation	GO:0043011	0.0370768	2	[BATF2, UBD]	8.69565	[5, 6, 7, 8, 9, 10]	GO_BiologicalProcess	[Group02]	0.0106
regulation of humoral immune response	GO:0002920	2.53098e-05	8	[ACOD1, C1QB, C1QC, C2, C4B, CFB, CXCL10, SERPING1]	5.12821	[4, 5]	GO_BiologicalProcess	[Group01]	6.14e-06
ER-nucleus signaling pathway	GO:0006984	0.0277443	3	[ATF3, CCL2, PLSCR4]	5.26316	[3, 4, 5]	GO_BiologicalProcess	[Group00]	0.00757

## Sheet: top 20 GO terms
	GO term	GO ID	GO term p value (Bonferroni step down corrected)	number of associated genes	associated genes	% of associated genes	GO levels	ontology source
1	response to interferon-gamma	GO:0034341	8.66064e-07	11	[ACOD1, CCL2, FCGR1A, FCGR1B, FCGR1CP, GBP1, GBP4, GBP5, GCH1, SOCS1, UBD]	4.43548	[4, 5]	GO_BiologicalProcess
2	regulation of humoral immune response	GO:0002920	2.53098e-05	8	[ACOD1, C1QB, C1QC, C2, C4B, CFB, CXCL10, SERPING1]	5.12821	[4, 5]	GO_BiologicalProcess
3	cellular response to interferon-gamma	GO:0071346	3.89368e-05	9	[ACOD1, CCL2, FCGR1A, FCGR1B, FCGR1CP, GBP1, GBP4, GBP5, SOCS1]	4	[5, 6]	GO_BiologicalProcess
4	chemokine-mediated signaling pathway	GO:0070098	0.000530647	6	[CCL2, CCRL2, CXCL10, CXCL11, CXCL9, SLIT2]	5.26316	[5, 6, 7]	GO_BiologicalProcess
5	indoleamine 2,3-dioxygenase activity	GO:0033754	0.000670171	2	[IDO1, IDO2]	100	[6]	GO_BiologicalProcess
6	positive regulation of endoribonuclease activity	GO:1902380	0.000670171	2	[HSPA1A, HSPA1B]	100	[5, 6, 7, 8, 9, 10, 11]	GO_BiologicalProcess
7	positive regulation of nucleotide-binding oligomerization domain containing 2 signaling pathway	GO:0070434	0.00193748	2	[HSPA1A, HSPA1B]	66.6667	[6, 7, 8, 9, 10, 11, 12, 13, 14, 15]	GO_BiologicalProcess
8	indolalkylamine metabolic process	GO:0006586	0.00225098	3	[AANAT, IDO1, IDO2]	16.6667	[5, 6, 7]	GO_BiologicalProcess
9	tryptophan 2,3-dioxygenase activity	GO:0004833	0.00359655	2	[IDO1, IDO2]	50	[6]	GO_BiologicalProcess
10	apoptotic cell clearance	GO:0043277	0.00376541	4	[C2, C4B, CCL2, TGM2]	7.14286	[6]	GO_BiologicalProcess
11	interferon-gamma-mediated signaling pathway	GO:0060333	0.00485844	5	[FCGR1A, FCGR1B, FCGR1CP, GBP1, SOCS1]	4.46429	[5, 6, 7]	GO_BiologicalProcess
12	cellular heat acclimation	GO:0070370	0.00509042	2	[HSPA1A, HSPA1B]	40	[5, 6]	GO_BiologicalProcess
13	uridylate kinase activity	GO:0009041	0.00509042	2	[CMPK2, CXCL9]	40	[8, 9, 10, 11]	GO_BiologicalProcess
14	negative regulation of interleukin-10 production	GO:0032693	0.00530905	3	[CD274, IDO1, PDCD1LG2]	12	[4, 5, 6]	GO_BiologicalProcess
15	tryptophan catabolic process to kynurenine	GO:0019441	0.00728106	2	[IDO1, IDO2]	33.3333	[5, 6, 7, 8, 9, 10]	GO_BiologicalProcess
16	cytidylate kinase activity	GO:0004127	0.00728106	2	[CMPK2, CXCL9]	33.3333	[8, 9, 10, 11]	GO_BiologicalProcess
17	negative regulation of CD8-positive, alpha-beta T cell activation	GO:2001186	0.00728106	2	[CD274, SOCS1]	33.3333	[7, 8, 9, 10]	GO_BiologicalProcess
18	tolerance induction	GO:0002507	0.00889374	3	[ACOD1, CD274, IDO1]	9.67742	[2, 3, 5, 6]	GO_BiologicalProcess
19	negative regulation of leukocyte chemotaxis	GO:0002689	0.00889374	3	[CCL2, SLAMF8, SLIT2]	9.67742	[4, 5, 6, 7, 8, 9]	GO_BiologicalProcess
20	'de novo' NAD biosynthetic process from tryptophan	GO:0034354	0.00923815	2	[IDO1, IDO2]	28.5714	[6, 7, 8, 9, 10, 11, 12, 13]	GO_BiologicalProcess
